# Supplementary material for: Multi-objective optimization strategy for green solvent design via a deep generative model learned from pre-set molecule pairs
Source: Royal Society of Chemistry journal article supplement (doi:10.1039/d3gc04354a), 2023-12-06
Supplement: d3gc04354a1.xlsx [file d3gc04354a1.xlsx]

## Sheet: Supporting Cover
	Multi-objective Optimization Strategy for Green Solvent Design via Deep Generative Model Learned from Pre-set Molecule Pairs
	Jun Zhanga, Qin Wangb,*, Huaqiang Wena,Vincent Gerbaudc, Saimeng Jina,and Weifeng Shena,*
	aSchool of Chemistry and Chemical Engineering, Chongqing University, Chongqing 400044, China
	bSchool of Chemistry and Chemical Engineering, Chongqing University of Science and Technology, Chongqing 401331, China
	cLaboratoire de Génie Chimique, Université de Toulouse, CNRS, INP, UPS, Toulouse, France
	*Corresponding author: E-mail: wangq356@mail2.sysu.edu.cn (Qin Wang), and shenweifeng@cqu.edu.cn (Weifeng Shen)
	Total number of tables:6 (Table S1, S2, S3, S4, S5, S6 and S7)

## Sheet: Table of contents
Table of contents ( Tables S1, S2, S3, S4 and S5)
Table S1. The quantum mechanical derived VCOSMO and σ-profile of 2130 compounds from UD database.
Table S2. The infinite dilution activity coefficient in benzene and cyclohexane of 2130 compounds.
Table S3. The optimal hyperparameter combinations for the random forest and support vector machine-based prediction models of the IDAC-benzene and IDAC-cyclohexane.
Table S4. The training molecule pairs for solvent molecular optimization.
Table S5. The SMILES information of the optimized extractive distillation solvent molecules.
Table S6. Operating parameters of extractive distillation with different solvents.
Table S7. The selectivity and solution capacity information of the molecular fragments.

## Sheet: Table S1
Table S1. The quantum mechanical derived VCOSMO and σ-profile of 2130 compounds from UD database.1
2125 molecules for training
No.	SMILES	Names	Vcosmo_A3	-0.025	-0.024	-0.023	-0.022	-0.021	-0.02	-0.019	-0.018	-0.017	-0.016	-0.015	-0.014	-0.013	-0.012	-0.011	-0.01	-0.009	-0.008	-0.007	-0.006	-0.005	-0.004	-0.003	-0.002	-0.001	0	0.001	0.002	0.003	0.004	0.005	0.006	0.007	0.008	0.009	0.01	0.011	0.012	0.013	0.014	0.015	0.016	0.017	0.018	0.019	0.02
1	CC=O	ACETALDEHYDE	64.2681	0	0	0	0	0	0	0	0	0	0	0	0	0	0	0	0	0	1.09743	5.48211	12.5063	8.47571	6.40412	6.02596	5.88683	5.82479	4.438	2.35365	1.23663	0.948222	0.422109	1.02138	0.841191	1.59655	1.44696	2.96912	4.57951	3.83271	2.93862	2.02611	0.441574	0	0	0	0	0	0
2	CC#N	ACETONITRILE	64.207	0	0	0	0	0	0	0	0	0	0	0	0	0	0	0	0.712612	6.87448	7.7117	4.5233	3.93171	8.5293	8.47993	1.76739	2.90561	2.762	0	0.828092	4.33878	2.03308	0.279464	1.92564	0.863868	2.48485	2.40659	4.91392	5.82258	4.43568	3.30903	1.23222	0	0	0	0	0	0	0
3	CC(C)=O	ACETONE	86.4189	0	0	0	0	0	0	0	0	0	0	0	0	0	0	0	0	0	0	4.56223	10.9593	11.2311	9.57762	8.37472	7.56531	12.5345	7.74583	5.33911	1.12642	1.60852	1.01067	0.133535	0.753192	0.807198	1.75385	1.49442	2.95608	5.07606	3.58303	2.24555	2.07253	0.134414	0	0	0	0	0
4	NCCN	ETHYLENEDIAMINE	90.4016	0	0	0	0	0	0	0	0	0	0	0	0	0	0	0.741928	4.92314	5.13904	3.25175	6.30804	4.91029	3.49464	7.01757	10.1839	13.1374	9.08347	5.5935	4.76427	2.33627	2.62999	3.19709	0.327591	1.01322	1.93901	0.803535	1.3876	2.09774	1.09179	0.298312	0.437253	2.47168	2.24285	0.506678	1.0491	0.961755	1.21633	1.60912
5	[O][N]N1CCCCC1	1-NITROSOPIPERIDINE	145.423	0	0	0	0	0	0	0	0	0	0	0	0	0	0	0	0	0	0	0.953448	6.8326	13.5402	20.93	23.0547	17.9587	12.6637	9.80463	6.41369	2.37171	1.77337	1.28671	2.01795	2.28406	2.59634	3.80554	3.84928	6.80844	4.41958	2.22687	1.77343	1.18493	0.153046	0	0	0	0	0
6	CCCO[C@@H](C)CO	2-PROPOXY-1-PROPANOL	168.613	0	0	0	0	0	0	0	0	0	0	0	0	0	0	0.213811	0.313108	0.930446	0.600705	0.856184	2.18245	10.8662	21.3233	25.9227	21.5194	18.4105	15.2733	13.408	11.0141	2.75221	1.76447	1.56458	2.93487	1.67284	1.04854	1.97084	2.48974	2.49606	2.30333	3.37767	3.1428	1.56955	0.47003	0	0	0	0
7	CCC/C=C/CCCC	TRANS-4-NONENE	205.642	0	0	0	0	0	0	0	0	0	0	0	0	0	0	0	0	0	0	0	0	0.311606	5.47374	24.5272	36.7114	38.3251	27.8278	25.929	27.3751	11.5476	3.06062	5.08626	1.80172	1.67602	2.34563	1.07849	0.034762	0	0	0	0	0	0	0	0	0	0
8	CCO	ETHANOL	70.1995	0	0	0	0	0	0	0	0	0	0.294716	0.627925	1.65843	0.234822	0.695635	0.929357	1.19294	0.840455	0.530297	0.838516	1.04973	3.99609	9.56714	10.292	9.76024	8.00148	6.44161	7.35531	4.79337	1.29113	1.46174	1.63447	1.08839	0.499964	1.14244	1.02748	1.29706	1.15088	1.56519	2.31584	2.14273	1.93338	0.755815	0	0	0	0
9	CCOCC	DIETHYL_ETHER	113.813	0	0	0	0	0	0	0	0	0	0	0	0	0	0	0	0	0	0	0	0	2.34497	11.3577	23.1961	21.8023	15.8238	14.5211	14.6662	10.0685	2.56044	1.19152	0.459343	1.47117	1.18394	0.333341	0.627281	1.45728	2.54674	1.86774	0.947223	1.83619	0.385406	0	0	0	0	0
10	C1CO1	ETHYLENE_OXIDE	62.1299	0	0	0	0	0	0	0	0	0	0	0	0	0	0	0	0	0	0	3.92429	10.1445	8.36267	5.52541	7.57341	6.6131	6.07578	4.40356	4.27923	2.89499	1.04693	1.1661	1.8624	0.50498	0.596263	2.47516	2.30522	3.15584	2.84536	3.15113	1.03074	0.270173	0	0	0	0	0	0
11	C=CCO	ALLYL_ALCOHOL	86.8692	0	0	0	0	0	0	0	0	0.152434	0.874525	1.01545	1.02185	0.697665	0.438749	1.21608	1.13117	0.843404	0.247106	1.069	7.62589	10.1646	9.79357	7.46795	6.0859	5.50711	4.55633	3.63371	6.29389	5.05778	3.50461	4.30592	4.08091	2.61996	3.44517	1.40912	1.02844	1.40146	1.89322	2.09857	2.14502	1.27764	0.072611	0	0	0	0
12	O=CO	FORMIC_ACID	53.3466	0	0	0	0	0	0	0.717978	1.14665	0.449786	1.58037	1.62483	0.309799	0.061355	0.39353	1.11708	2.90635	3.78329	2.07424	1.92221	1.51696	2.43377	2.72144	3.36904	3.16053	2.57151	2.94373	0.941606	2.35774	2.51613	3.12535	2.22059	1.19814	4.14151	3.84563	3.84102	6.12074	3.49685	1.38757	0.181289	0	0	0	0	0	0	0
13	CCOC=O	ETHYL_FORMATE	97.1818	0	0	0	0	0	0	0	0	0	0	0	0	0	0	0	0.025506	2.64359	2.70564	1.86593	6.01546	10.6162	12.5068	11.9276	10.1635	7.38555	9.5219	5.65233	1.65897	2.55058	2.25541	1.88021	3.34687	2.22208	3.28014	2.72598	4.51618	4.94622	2.55283	0.633638	0	0	0	0	0	0	0
14	Nc1ccccc1	ANILINE	125.425	0	0	0	0	0	0	0	0	0	0	0	0.287511	1.6384	2.81659	2.3732	2.36917	3.00587	2.51837	4.21045	7.73836	9.75399	9.84546	7.4582	6.09759	5.95124	5.98864	4.33265	4.34504	7.7874	7.16048	5.76011	12.7848	7.84392	6.61653	1.67885	0.594384	1.48632	0.442503	0.345541	0.83513	0.827704	0.472742	0	0	0	0
15	COc1ccccc1	ANISOLE	142.778	0	0	0	0	0	0	0	0	0	0	0	0	0	0	0	0	0	0.301074	4.48343	15.8902	16.3638	12.1227	11.5338	9.50517	8.34728	5.40392	7.92189	4.0182	9.62472	8.01581	10.7775	9.0939	10.0038	3.12591	1.35104	2.14217	0.442184	0	0	0	0	0	0	0	0	0
16	Cc1ccccn1	2-METHYLPYRIDINE	126.747	0	0	0	0	0	0	0	0	0	0	0	0	0	0	0	0	0	0.662695	6.91144	10.7344	13.1805	10.8359	8.35366	6.86319	10.2287	10.7551	10.1231	8.15667	9.10052	12.4569	5.1669	2.0465	0.661299	0.857712	2.04085	0.467421	0.977277	1.52271	1.14982	1.16854	0.337567	0.620968	0.939359	0.336394	0.009098	0
17	CC1=CC[C@H]2C[C@@H]1C2(C)C	ALPHA-PINENE	198.779	0	0	0	0	0	0	0	0	0	0	0	0	0	0	0	0	0	0	0	0	0.552717	7.16115	18.8077	27.7604	29.0438	25.4839	27.4743	24.2575	14.8255	3.09389	2.5334	2.24299	0.714063	0.573998	0.018855	0	0	0	0	0	0	0	0	0	0	0
18	CCOC(C)=O	ETHYL_ACETATE	118.169	0	0	0	0	0	0	0	0	0	0	0	0	0	0	0	0	0	0.139035	3.17962	6.66326	14.0389	14.8695	14.6314	14.362	14.3143	10.5526	6.66571	3.2054	1.93151	2.64263	1.63271	2.15765	3.3951	2.00645	3.89766	2.39702	4.73538	4.02867	2.00821	0.1629	0	0	0	0	0	0
19	CC[C@H](C)O	2-BUTANOL	113.742	0	0	0	0	0	0	0	0	0	0.156554	0.49774	1.55463	0.462253	0.779764	0.437957	1.31274	1.03718	0.500426	0.59475	1.25686	2.21986	7.51078	15.7412	18.0854	13.9155	10.6831	12.5386	13.3527	6.71411	1.80018	1.02635	0.769418	1.2861	0.854886	1.01709	0.450136	1.41742	2.14958	2.30832	1.4727	1.19131	0.570727	0	0	0	0
20	OCc1ccccc1	BENZYL_ALCOHOL	142.876	0	0	0	0	0	0	0	0	0	0.406875	1.0922	1.32731	0	0.454307	1.47385	1.02385	0.921614	0.146656	2.35324	11.9914	15.713	12.9395	9.41661	8.86002	8.70554	7.34299	6.44765	7.5874	8.61157	6.20407	12.0903	7.15297	6.10479	1.1596	1.14039	2.24841	0.809829	1.40726	1.95198	2.04172	0.840568	0.015828	0	0	0	0
21	CCc1ccccc1	ETHYLBENZENE	152.985	0	0	0	0	0	0	0	0	0	0	0	0	0	0	0	0	0	0	0.377624	6.35067	10.3093	18.5345	16.2618	16.4534	12.7093	12.714	12.4806	9.07534	8.80397	5.91867	7.25554	9.28892	8.63315	3.00952	0.018727	0	0	0	0	0	0	0	0	0	0	0
22	CC(=O)O[C@@H](C)[C@@H](C)OC(C)=O	2,3-BUTANEDIOLDIACETATE	224.93	0	0	0	0	0	0	0	0	0	0	0	0	0	0	0	0	0	0.290535	6.60644	10.7556	22.3221	20.6195	22.2015	25.9136	25.6337	18.0585	10.6766	5.89881	2.34719	2.71114	3.87635	4.79192	3.64687	5.88524	5.32233	3.34822	10.181	4.97768	2.51994	0.007018	0	0	0	0	0	0
23	Clc1ccccc1	MONOCHLOROBENZENE	132.836	0	0	0	0	0	0	0	0	0	0	0	0	0	0	0	0	0.004387	2.48983	9.60322	10.533	8.86537	7.23712	7.43055	5.98103	4.58279	7.46085	10.6176	10.8181	15.5119	20.4012	16.7985	2.72874	0	0	0	0	0	0	0	0	0	0	0	0	0	0
24	Clc1ccc(Cl)cc1	P-DICHLOROBENZENE	155.596	0	0	0	0	0	0	0	0	0	0	0	0	0	0	0	0	2.81197	8.60918	7.80116	5.0239	6.18152	4.7345	7.60314	4.93132	3.28298	17.7436	11.164	23.6881	27.6792	23.4493	5.73248	0	0	0	0	0	0	0	0	0	0	0	0	0	0	0
25	N#Cc1ccccc1	BENZONITRILE	136.279	0	0	0	0	0	0	0	0	0	0	0	0	0	0	0	0	2.37731	8.27222	12.0807	10.151	6.04878	5.54727	6.07367	9.47198	9.26225	10.3984	8.8427	11.7337	12.2679	8.22215	1.25211	1.96388	2.42359	4.3699	4.54949	4.68394	3.98897	2.13313	0.105965	0	0	0	0	0	0	0
26	O=[N+]([O-])c1ccccc1	NITROBENZENE	141.475	0	0	0	0	0	0	0	0	0	0	0	0	0	0	0	0	0.333056	8.08109	11.1076	10.5443	7.23442	7.53973	8.52051	6.79671	7.29134	14.5983	5.65574	13.8185	11.2122	6.19427	3.48793	9.69466	5.53663	4.03236	2.22096	2.29696	2.88342	0.569935	0	0	0	0	0	0	0	0
27	C#N	HYDROGEN_CYANIDE	44.0306	0	0	0	0	0	0	0	0	1.81549	2.87431	1.06946	0.7983	1.12999	0.086939	1.4505	2.21449	0.034433	0.12321	2.78703	3.13477	0.644648	0	3.21475	4.82841	0.040218	0.153186	4.33185	3.42718	0.40343	2.61915	1.61766	2.9141	5.33521	6.19074	4.18254	3.01827	1.45879	0	0	0	0	0	0	0	0	0
28	C=C1CC[C@@H]2C[C@H]1C2(C)C	BETA-PINENE	198.775	0	0	0	0	0	0	0	0	0	0	0	0	0	0	0	0	0	0	0	0.016094	2.6315	11.6146	23.0579	28.7116	24.7073	19.3573	20.9941	23.0449	11.7152	4.96026	2.57869	2.66827	3.25073	1.86182	1.25164	0.620365	0	0	0	0	0	0	0	0	0	0
29	O=C(O)c1ccc([N+](=O)[O-])cc1	3-NITROBENZOICACID	177.565	0	0	0	0	0	0.038343	1.02699	0.701173	0.756281	1.4954	1.22928	0.34413	0.1324	0.367575	1.0308	0.988886	3.9334	7.27287	8.38063	4.98966	5.26065	10.5324	9.78296	12.6432	14.571	15.2067	13.3677	5.63913	5.34068	6.74251	7.91505	11.4063	9.11839	3.25517	4.33072	9.33572	3.27654	0.378963	0	0	0	0	0	0	0	0
30	CCCCOCCO	2-BUTOXYETHANOL	168.257	0	0	0	0	0	0	0	0	0.071772	0.54313	1.63912	0.533103	0.692187	0.745306	1.1249	1.04045	0.617318	0.877358	1.09	2.23188	4.97236	13.5381	25.7483	24.8442	23.0795	16.7516	12.5282	13.5264	5.67648	2.08183	2.12651	1.76228	1.32078	1.61132	2.20592	4.36728	3.03923	2.92299	3.70828	2.6414	1.06337	0	0	0	0	0
31	CCCCO	1-BUTANOL	113.874	0	0	0	0	0	0	0	0	0	0.268247	0.653823	1.56247	0.125944	0.925957	0.932367	1.11935	0.774813	0.62491	0.827746	0.991913	2.31357	6.83955	17.354	18.5348	16.886	12.3873	10.9635	11.8919	4.26642	1.549	1.07876	1.28585	0.828813	1.07249	1.16875	0.772587	1.26927	1.9824	1.6643	2.41643	1.97809	0.805567	0	0	0	0
32	CCC(C)=O	METHYL_ETHYL_KETONE	107.21	0	0	0	0	0	0	0	0	0	0	0	0	0	0	0	0	0	0.024346	2.21982	8.87949	11.271	12.6534	11.4868	14.177	13.8397	8.84299	6.84576	7.14791	1.21842	1.75691	0.96926	0.568313	0.89877	1.64476	2.44262	0.466617	4.59509	4.20238	2.21536	1.94415	0.500665	0	0	0	0	0
33	CCCC	N-BUTANE	102.433	0	0	0	0	0	0	0	0	0	0	0	0	0	0	0	0	0	0	0	0	0	0.956381	11.1544	17.9363	23.0528	16.1559	17.5113	17.2389	12.7017	0.635667	0	0	0	0	0	0	0	0	0	0	0	0	0	0	0	0
34	Cl/C=C\Cl	CIS-1,2-DICHLOROETHYLENE	97.5568	0	0	0	0	0	0	0	0	0	0	0	0	0	0	0.931519	5.39884	4.14173	2.76545	1.87655	1.78396	2.63696	4.46951	4.65896	3.09671	8.69421	6.84024	4.79673	10.3123	22.5592	18.9876	7.21642	0.241186	0	0	0	0	0	0	0	0	0	0	0	0	0	0
35	OCCCl	2-CHLOROETHANOL	93.3623	0	0	0	0	0	0	0	0	0.381613	0.981902	1.62002	0.829028	0.202073	1.1615	1.61871	1.25658	0.981405	3.36173	5.54331	6.99254	7.00949	5.41999	5.7729	4.69371	5.94531	2.23153	3.03542	6.61354	4.93146	2.53708	9.17862	9.04494	6.35624	0.951783	1.68702	0.988493	1.69067	2.01976	2.07149	1.5478	0.016726	0	0	0	0	0
36	CC(C)CCl	ISOBUTYL_CHLORIDE	125.857	0	0	0	0	0	0	0	0	0	0	0	0	0	0	0	0	0	0.157974	2.50249	4.0513	4.44067	12.9859	16.5551	15.6995	11.027	11.455	10.2787	13.7758	6.27324	1.84465	3.62197	10.6636	6.15679	2.28935	0	0	0	0	0	0	0	0	0	0	0	0
37	CCCCCl	N-BUTYL_CHLORIDE	126.212	0	0	0	0	0	0	0	0	0	0	0	0	0	0	0	0	0	0.192553	2.78229	3.99162	4.15746	10.454	19.5186	18.3784	13.1261	12.2766	8.8378	12.1705	5.97163	2.11103	2.61222	11.1134	7.40076	2.89781	0	0	0	0	0	0	0	0	0	0	0	0
38	ClC(Cl)Cl	CHLOROFORM	105.651	0	0	0	0	0	0	0	0	0	0	0	0.199974	2.88654	1.37537	0.969829	1.83051	0.307674	0.485606	0.458605	2.52526	5.79265	5.20327	1.89842	10.5293	6.95611	2.16656	9.1734	23.7247	25.392	15.5684	0	0	0	0	0	0	0	0	0	0	0	0	0	0	0	0
39	N#CCl	CYANOGEN_CHLORIDE	64.7177	0	0	0	0	0	0	0	0	0	0	0	0	0	0.146726	0.406691	2.42037	0.540404	0.443452	3.49532	1.77178	3.4072	9.69166	15.6189	7.82201	4.38039	4.35794	0.798221	0.857408	1.92755	1.3332	1.76823	3.64631	3.9883	5.79811	4.42457	3.2686	0.418529	0	0	0	0	0	0	0	0	0
40	Cc1cccc(O)c1	M-CRESOL	142.604	0	0	0	0	0	0	0.082456	0.782382	1.27294	0.57197	0.782729	1.31407	0.848741	0.650568	0.830132	0.841657	0.768847	1.28119	2.34001	6.29736	12.3806	10.8706	11.3607	7.53035	7.4683	11.5026	10.4273	5.30803	8.04106	8.20445	9.60862	10.7774	7.57201	3.94469	0.980546	2.47969	2.59294	0.452934	0	0	0	0	0	0	0	0
41	C1CCCC1	CYCLOPENTANE	109.293	0	0	0	0	0	0	0	0	0	0	0	0	0	0	0	0	0	0	0	0	0	0.360494	9.86707	18.8427	23.8649	22.6403	14.2936	15.5821	14.3869	0.166834	0	0	0	0	0	0	0	0	0	0	0	0	0	0	0	0
42	C1=CCCCC1	CYCLOHEXENE	121.826	0	0	0	0	0	0	0	0	0	0	0	0	0	0	0	0	0	0	0	0	0.938016	7.78959	17.4552	20.2215	21.0535	15.8876	17.6751	9.36702	3.80904	3.63741	2.17316	2.61761	2.73012	1.76665	2.19014	0.448659	0	0	0	0	0	0	0	0	0	0
43	CC1CCCCC1	METHYLCYCLOHEXANE	150.418	0	0	0	0	0	0	0	0	0	0	0	0	0	0	0	0	0	0	0	0	0	0.31114	8.86489	25.2783	33.8033	25.9163	22.69	18.558	14.3691	1.08724	0	0	0	0	0	0	0	0	0	0	0	0	0	0	0	0
44	CC1CCCC1	METHYLCYCLOPENTANE	132.254	0	0	0	0	0	0	0	0	0	0	0	0	0	0	0	0	0	0	0	0	0	0.606554	11.0587	21.776	28.7009	24.3363	18.3041	16.1714	16.7709	0.715156	0	0	0	0	0	0	0	0	0	0	0	0	0	0	0	0
45	ClCCOCCCl	DI(2-CHLOROETHYL)ETHER	160.234	0	0	0	0	0	0	0	0	0	0	0	0	0	0	0	0	0.296141	5.88886	8.56266	10.5288	17.573	11.1771	14.3477	10.6504	7.5091	3.0311	8.8506	10.3652	5.43847	5.76234	20.8253	15.3717	8.18825	2.90964	0.427829	1.33726	1.33616	0.009218	0	0	0	0	0	0	0	0
46	CCCCOCCCC	DI-N-BUTYL_ETHER	200.867	0	0	0	0	0	0	0	0	0	0	0	0	0	0	0	0	0	0	0	0	0	5.34061	33.0066	42.0067	35.6827	26.7198	20.5593	23.6342	8.89112	1.38937	0.417022	1.30453	1.22684	0.278707	0.55036	1.21491	2.44157	2.33506	0.787055	1.74565	0.543523	0	0	0	0	0
47	CCCCCCCCCC	N-DECANE	233.483	0	0	0	0	0	0	0	0	0	0	0	0	0	0	0	0	0	0	0	0	0	0.949013	14.6661	38.2561	53.0876	39.9168	37.5679	25.7165	25.349	1.42828	0	0	0	0	0	0	0	0	0	0	0	0	0	0	0	0
48	CCNCC	DIETHYLAMINE	118.168	0	0	0	0	0	0	0	0	0	0	0	0	0	0	0	0.290355	1.21905	0.872375	1.62351	0.835527	1.56962	9.07128	13.7528	20.1501	20.6793	16.2206	15.622	16.333	3.80972	1.95952	1.28757	0.123029	0.406289	0.740745	0.39727	0.396348	0.546228	0.515155	0.234756	1.1767	1.23669	0.019682	0.767245	0.199154	0.445542	0.650574
49	CN(C)c1ccccc1	N,N-DIMETHYLANILINE	167.784	0	0	0	0	0	0	0	0	0	0	0	0	0	0	0	0	0	0.00201	2.98783	8.90305	16.2844	17.7267	16.9128	15.2966	17.2739	10.4842	6.80456	7.03778	5.57775	7.33375	6.60793	9.23813	9.58087	7.42299	4.2859	0.154785	0	0	0	0	0	0	0	0	0	0
50	CC(Cl)Cl	1,1-DICHLOROETHANE	104.626	0	0	0	0	0	0	0	0	0	0	0	0	0	0	0.546937	3.11618	1.1151	1.31124	4.26966	6.77527	6.73571	6.18447	6.58497	8.5336	6.22727	6.36387	8.00157	3.06221	6.35589	17.2607	15.1174	8.64907	0	0	0	0	0	0	0	0	0	0	0	0	0	0
51	ClCCCl	1,2-DICHLOROETHANE	104.326	0	0	0	0	0	0	0	0	0	0	0	0	0	0	0	0	3.54418	9.39581	5.98485	5.5306	6.8423	4.56954	4.22685	4.62969	5.26386	1.70721	10.6591	7.87426	4.00177	9.12472	18.6019	13.8999	1.62367	0	0	0	0	0	0	0	0	0	0	0	0	0
52	Cl/C=C/Cl	TRANS-1,2-DICHLOROETHYLENE	98.0879	0	0	0	0	0	0	0	0	0	0	0	0	0	0	1.47441	5.01607	2.71434	1.60588	2.65551	1.54964	2.50309	5.71062	3.45762	2.78019	9.16617	9.73422	7.3465	11.9261	24.6249	18.7217	2.33059	0	0	0	0	0	0	0	0	0	0	0	0	0	0	0
53	ClCCl	DICHLOROMETHANE	82.7465	0	0	0	0	0	0	0	0	0	0	0	0	0	0	2.7589	5.47889	2.1303	3.64347	2.11408	2.67296	1.68488	2.42676	6.32208	2.97693	3.46612	9.0986	3.85111	0.741642	14.0724	14.1068	18.4086	2.4296	0	0	0	0	0	0	0	0	0	0	0	0	0	0
54	C[C@@H](Cl)CCl	1,2-DICHLOROPROPANE	129.192	0	0	0	0	0	0	0	0	0	0	0	0	0	0	0	0	0.569426	5.4675	7.61626	7.62189	10.7533	9.89102	7.26632	6.6593	10.3141	4.08631	6.71815	8.55854	4.36133	4.48781	15.9587	14.5392	7.12081	1.85221	0	0	0	0	0	0	0	0	0	0	0	0
55	CN(C)C=O	N,N-DIMETHYLFORMAMIDE	102.005	0	0	0	0	0	0	0	0	0	0	0	0	0	0	0	0	0	0.6497	4.99034	9.1657	14.3158	11.8073	9.9092	16.0165	12.0096	3.95057	4.44485	2.645	2.89629	2.02028	0.057198	0.250632	1.04653	0.958241	0.933726	1.26735	2.20947	1.90125	4.89508	5.36781	1.77246	0.555063	0	0	0	0
56	COCOC	METHYLAL	105.016	0	0	0	0	0	0	0	0	0	0	0	0	0	0	0	0	0	0	0.657108	3.7482	15.5238	23.042	14.523	15.5376	10.9035	3.48479	4.01056	2.23639	1.53227	2.32628	1.42163	1.90628	1.45957	1.15282	2.89686	1.66272	2.6954	2.54556	7.75209	1.15196	0	0	0	0	0	0
57	CC(C)CC(C)C	2,4-DIMETHYLPENTANE	168.829	0	0	0	0	0	0	0	0	0	0	0	0	0	0	0	0	0	0	0	0	0	1.24188	15.7573	26.5328	35.2414	23.5662	20.3958	21.2792	20.6919	2.67611	0	0	0	0	0	0	0	0	0	0	0	0	0	0	0	0
58	C1COCCO1	1,4-DIOXANE	110.138	0	0	0	0	0	0	0	0	0	0	0	0	0	0	0	0	0	0	0.168846	8.38899	11.9235	19.9086	18.0485	10.988	9.03735	6.02393	3.22237	2.57181	1.98651	2.47071	2.1761	2.57081	0.928771	2.82234	3.58243	1.50623	3.48138	3.93602	3.95248	0.773427	0	0	0	0	0	0
59	Cc1cccc(C)n1	2,6-DIMETHYLPYRIDINE	147.988	0	0	0	0	0	0	0	0	0	0	0	0	0	0	0	0	0	0.155346	4.0344	7.75078	14.8749	13.0296	15.9186	9.89782	10.7234	16.8796	13.4333	8.91553	8.84863	10.7566	8.47278	1.41	1.54548	0.444243	1.24411	1.04844	0.867644	1.40482	0.649055	1.77723	0.50266	0.468812	0.553039	0.34464	0	0
60	CCCCCCCCCCCC	N-DODECANE	276.861	0	0	0	0	0	0	0	0	0	0	0	0	0	0	0	0	0	0	0	0	0	0.93305	15.8071	44.818	63.3913	47.6181	44.3906	28.74	29.1853	1.77478	0	0	0	0	0	0	0	0	0	0	0	0	0	0	0	0
61	O=Cc1ccccc1	BENZALDEHYDE	137.045	0	0	0	0	0	0	0	0	0	0	0	0	0	0	0	0	0	2.29616	13.0298	15.1298	9.64573	8.14041	8.53807	6.44529	7.265	7.35742	11.1785	8.84239	12.1615	11.1192	4.33058	1.21196	1.059	2.40283	2.47538	3.77236	4.61084	2.5424	1.00599	0.385949	0	0	0	0	0	0
62	CCCCOC(C)=O	N-BUTYL_ACETATE	162.665	0	0	0	0	0	0	0	0	0	0	0	0	0	0	0	0	0	0.117039	3.2312	6.45576	8.69412	12.3679	22.0758	24.0086	24.8226	15.9125	11.9802	11.9759	3.07793	2.03943	1.89613	2.51507	2.63421	2.52693	4.204	2.26362	3.82572	3.95848	1.75528	0.127094	0	0	0	0	0	0
63	CC(=O)OC1CCCCC1	CYCLOHEXYL_ACETATE	187.781	0	0	0	0	0	0	0	0	0	0	0	0	0	0	0	0	0	0	1.18035	5.10247	6.41232	9.5372	26.9676	32.4957	28.4674	22.8566	15.1366	9.28648	1.43376	1.72116	1.92823	2.83506	2.30104	2.50335	4.17603	2.23265	4.84982	3.34598	1.41293	0.045744	0	0	0	0	0	0
64	COC(C)=O	METHYL_ACETATE	97.0004	0	0	0	0	0	0	0	0	0	0	0	0	0	0	0	0	0	0.65316	5.30165	10.5415	11.1761	8.50414	11.3889	14.8343	10.1354	5.34039	2.75917	1.87706	1.84617	3.15409	1.63266	2.52527	3.03683	2.63133	3.4453	1.88469	4.8752	3.96848	1.84433	0.19861	0	0	0	0	0	0
65	CC(=O)O	ACETIC_ACID	74.6883	0	0	0	0	0	0	0.039176	0.967933	0.759381	0.553395	1.41507	1.42994	0.375748	0.139824	0.330555	0.848279	0.913335	1.52763	5.50714	5.87446	5.01505	5.68692	4.62892	9.55357	7.1954	2.62354	2.44982	0.709637	3.03456	2.65641	3.01961	2.16614	1.00138	4.87901	3.88552	3.70899	5.72802	2.87701	1.04308	0	0	0	0	0	0	0
66	O=Cc1ccco1	FURFURAL	115.002	0	0	0	0	0	0	0	0	0	0	0	0	0	0	1.26443	3.82036	5.14051	6.4627	7.81312	7.12071	5.6055	4.65403	6.80419	6.79084	6.10048	7.92436	11.4343	7.44662	6.58051	4.80351	2.26545	2.13734	2.18011	2.73331	2.73922	3.27424	5.36943	3.5017	2.89468	0.720452	0	0	0	0	0	0
67	CCCNCCC	DI-N-PROPYLAMINE	162.107	0	0	0	0	0	0	0	0	0	0	0	0	0	0	0	0.353471	1.23409	0.856399	1.51642	0.943617	1.09328	5.87743	20.7266	26.5756	30.4478	22.348	20.4727	22.8149	6.08573	2.6258	1.40707	0.228271	0.438267	0.681354	0.521807	0.429288	0.380139	0.536817	0.284963	0.717915	1.46478	0.543058	0.407513	0.314781	0.385039	0.360456
68	C=CCCCCCCCCCCCCCC	1-HEXADECENE	361.17	0	0	0	0	0	0	0	0	0	0	0	0	0	0	0	0	0	0	0	0.714119	4.23636	7.85396	25.6159	57.6194	71.6039	56.6076	50.1498	30.3961	29.4341	5.31637	2.48671	3.34474	3.12343	1.97929	2.2499	0.111742	0	0	0	0	0	0	0	0	0	0
69	CCCCCC	N-HEXANE	146.129	0	0	0	0	0	0	0	0	0	0	0	0	0	0	0	0	0	0	0	0	0	0.941002	12.2497	24.8328	33.0897	23.9932	24.2984	19.8874	16.9846	0.911195	0	0	0	0	0	0	0	0	0	0	0	0	0	0	0	0
70	CCCCCCC	N-HEPTANE	167.981	0	0	0	0	0	0	0	0	0	0	0	0	0	0	0	0	0	0	0	0	0	0.921001	12.8652	28.1878	38.1209	27.8597	27.5202	21.1864	19.4674	0.805663	0	0	0	0	0	0	0	0	0	0	0	0	0	0	0	0
71	CCCCCC(C)=O	2-HEPTANONE	173.128	0	0	0	0	0	0	0	0	0	0	0	0	0	0	0	0	0	0	1.5597	9.62357	9.83666	9.69916	18.5281	25.5566	28.3542	18.9587	15.3095	13.9258	7.29708	1.93413	0.481989	0.636121	0.936393	1.75045	1.98811	1.34257	4.62244	4.16093	2.09242	1.98634	0.090536	0	0	0	0	0
72	NN	HYDRAZINE	47.9806	0	0	0	0	0	0	0	0	0	0	0	0	0	0	2.20922	7.04396	4.20342	5.95782	5.1607	5.2379	2.38456	2.51452	2.68804	2.59782	0.959867	0.726601	1.19612	1.12763	0.33654	1.64809	1.04359	1.90709	1.0342	2.10034	0.785253	0.742581	0.74334	3.06434	0.610816	1.70235	0.611593	2.00368	1.50417	1.91328	0.54397	1.11633
73	CCC(C)C	ISOPENTANE	124.677	0	0	0	0	0	0	0	0	0	0	0	0	0	0	0	0	0	0	0	0	0	1.36411	14.1356	20.0535	26.3915	16.872	17.8562	19.4512	15.642	1.67725	0	0	0	0	0	0	0	0	0	0	0	0	0	0	0	0
74	CC(C)O	ISOPROPANOL	92.4135	0	0	0	0	0	0	0	0	0	0.182422	0.431774	1.81649	0.187477	0.465476	1.00644	1.69786	0.422492	0.575785	1.032	1.2534	2.67306	10.0087	13.1473	14.5484	8.64791	7.92179	10.9082	10.8807	2.54183	1.35868	1.12217	0.952505	1.05964	0.405232	0.984607	0.438147	1.82604	2.23176	1.20999	1.88248	2.25586	1.12315	0	0	0	0
75	CC(C)OC(C)C	DIISOPROPYL_ETHER	159.525	0	0	0	0	0	0	0	0	0	0	0	0	0	0	0	0	0	0	0	0	2.24212	17.1328	21.5358	27.6088	17.5865	16.7326	14.7144	26.423	7.90008	0.855168	1.04549	0.318654	1.05369	1.59238	0.291272	0.229404	1.78345	1.50345	0.831782	1.38956	1.06423	0.07877	0	0	0	0
76	CC(C)CC(C)(C)C	2,2,4-TRIMETHYLPENTANE	191.139	0	0	0	0	0	0	0	0	0	0	0	0	0	0	0	0	0	0	0	0	0	2.05401	19.6749	29.9534	36.2384	19.6866	19.3885	22.7558	26.0536	3.79454	0	0	0	0	0	0	0	0	0	0	0	0	0	0	0	0
77	C=CC(=C)C	ISOPRENE	113.208	0	0	0	0	0	0	0	0	0	0	0	0	0	0	0	0	0	0	0.301523	5.58456	12.6971	13.9269	11.3242	8.79061	8.56226	9.00645	9.80597	9.71859	6.05061	6.52979	7.92193	6.42242	4.99913	3.13816	0.092286	0	0	0	0	0	0	0	0	0	0	0
78	C=CCCCC	1-HEXENE	141.288	0	0	0	0	0	0	0	0	0	0	0	0	0	0	0	0	0	0	0	0.699901	4.2971	8.11187	20.0218	23.1028	21.7134	16.864	16.1465	15.4695	9.16338	4.40114	2.09888	3.27828	3.65534	1.68342	2.26336	0.075317	0	0	0	0	0	0	0	0	0	0
79	CC(C)NC(C)C	DIISOPROPYLAMINE	164.809	0	0	0	0	0	0	0	0	0	0	0	0	0	0	0	0.072085	0.570742	0.842238	1.02855	1.24766	0.883861	8.32666	24.3329	25.2548	24.5388	16.8639	15.6721	21.1125	13.3302	2.21005	1.5371	1.15393	0.641653	0.365103	0.643691	1.24293	0.537693	0.105733	0.413695	0.169205	0.663765	0.565007	0.237355	0.64233	0.463737	0.173895
80	CCCCCCN	N-HEXYLAMINE	162.962	0	0	0	0	0	0	0	0	0	0	0	0	0	0	0.061893	1.36668	2.9978	1.46724	2.9395	2.66248	2.64399	3.50046	17.7984	27.7588	29.0988	21.5988	18.3105	15.6202	10.938	1.04582	1.54428	0.428924	1.00129	0.780135	0.508529	1.15827	0.678586	0.289678	0.138768	0.598621	1.38283	0.292865	0.851295	0.426642	1.23715	0.375137
81	Cc1cccc2ccccc12	1-METHYLNAPHTHALENE	188.772	0	0	0	0	0	0	0	0	0	0	0	0	0	0	0	0	0	0	2.91034	14.7373	20.2753	15.7084	13.4008	10.8045	9.48459	10.8335	12.564	10.7619	10.1093	12.9955	20.1525	15.7199	4.18924	0	0	0	0	0	0	0	0	0	0	0	0	0
82	Cc1ccc2ccccc2c1	2-METHYLNAPHTHALENE	189.078	0	0	0	0	0	0	0	0	0	0	0	0	0	0	0	0	0	0	3.10362	15.1219	18.9658	15.509	14.8012	9.44021	10.835	13.812	12.2754	9.13488	11.0773	12.2672	21.6565	15.9979	3.23103	0	0	0	0	0	0	0	0	0	0	0	0	0
83	CO	METHANOL	48.771	0	0	0	0	0	0	0	0	0.069536	0.709983	1.40696	0.848034	0.797305	0.479231	0.838825	1.3964	0.851284	0.765436	0.486886	1.91212	3.94914	6.38771	6.99273	4.63372	6.98311	5.43581	1.87473	2.28371	0.928576	1.33915	1.73926	1.21514	0.681159	0.909788	0.725364	1.8499	0.903892	1.38784	2.81258	2.10495	1.83358	0.367752	0	0	0	0
84	CCCC(C)C	2-METHYLPENTANE	146.475	0	0	0	0	0	0	0	0	0	0	0	0	0	0	0	0	0	0	0	0	0	1.17758	14.9231	23.624	31.507	20.5222	21.078	20.7376	17.634	1.99656	0	0	0	0	0	0	0	0	0	0	0	0	0	0	0	0
85	CCC(C)CC	3-METHYLPENTANE	145.621	0	0	0	0	0	0	0	0	0	0	0	0	0	0	0	0	0	0	0	0	0	1.99653	15.0789	21.8449	29.3686	20.1157	21.3915	24.8544	15.0082	1.34345	0	0	0	0	0	0	0	0	0	0	0	0	0	0	0	0
86	COCCO	2-METHOXYETHANOL	104.069	0	0	0	0	0	0	0	0	0.163244	0.549229	1.51106	0.36897	0.928825	0.760223	1.33285	0.835558	0.649016	0.458277	1.5577	3.22574	9.50416	16.3371	13.1386	9.85149	12.343	8.19624	4.01287	2.62057	2.91888	2.4133	2.56616	1.41491	1.33944	2.1451	2.58598	4.34955	1.82491	3.33498	4.39799	2.28666	0.907887	0	0	0	0	0
87	C1COCCN1	MORPHOLINE	113.816	0	0	0	0	0	0	0	0	0	0	0	0	0	0	0.837754	2.01734	0.730423	1.56311	0.914808	2.67878	9.91303	13.4372	15.5039	19.703	12.9262	9.90283	3.36065	2.24143	4.09985	1.93562	1.3912	1.35279	1.57657	0.932485	1.44898	3.09654	1.13257	2.22003	2.85436	2.65607	0.258519	0.378024	1.21012	0.398132	0.308489	0.327531
88	CC(=O)CC(C)(C)O	DIACETONE_ALCOHOL	161.674	0	0	0	0	0	0	0	0	0	0	0	0	0	0	0	0	0	0.286171	5.49233	11.7989	12.5683	17.0518	16.0147	17.6222	15.1337	10.169	12.7304	8.21508	4.08885	1.4506	2.34839	2.43333	2.34317	2.53429	3.6601	3.08292	2.74879	3.06646	2.25255	1.84131	2.40003	0.483305	0	0	0	0
89	CCCCc1ccccc1	N-BUTYLBENZENE	196.409	0	0	0	0	0	0	0	0	0	0	0	0	0	0	0	0	0	0	0.386556	6.44892	9.43135	15.2469	22.3584	25.4159	22.6047	16.9775	17.4235	15.0349	11.8847	6.51912	6.80965	9.54911	7.79138	3.72574	0.086207	0	0	0	0	0	0	0	0	0	0	0
90	CC(=O)CC(C)C	METHYL_ISOBUTYL_KETONE	151.696	0	0	0	0	0	0	0	0	0	0	0	0	0	0	0	0	0	0.02338	1.72372	7.84658	10.7098	11.5889	17.1385	19.8465	19.4468	15.5169	11.0784	13.5979	6.90904	2.07219	1.37834	0.6741	0.992458	1.42695	2.37081	1.06728	4.11578	3.84049	1.67872	1.36255	0.402121	0	0	0	0	0
91	Cc1cccnc1	3-METHYLPYRIDINE	127.454	0	0	0	0	0	0	0	0	0	0	0	0	0	0	0	0	0	0.470316	5.65165	10.5357	14.9691	11.3755	8.14457	7.45797	11.7339	11.4671	8.42596	7.58493	9.16243	11.1084	4.08239	1.98195	0.93542	0.872066	2.60703	0.499315	1.02997	1.72318	0.980012	0.907619	0.834729	1.23846	0.652576	0.26633	0	0
92	Cc1ccncc1	4-METHYLPYRIDINE	128.05	0	0	0	0	0	0	0	0	0	0	0	0	0	0	0	0	0	0.225333	5.13586	11.4429	14.7993	12.2899	7.75559	8.41373	11.2506	10.399	9.58981	5.97527	9.75841	12.4679	3.1257	2.01854	0.809491	0.932875	2.59209	0.455262	0.922273	2.18861	0.847821	0.734847	0.986244	1.21288	0.708599	0.290266	0	0
93	CC(C)CO	2-METHYL-1-PROPANOL	113.934	0	0	0	0	0	0	0	0	0	0.283656	0.762573	1.85793	0.295147	0.491119	0.972401	0.888432	1.14634	0.571907	0.779111	0.843162	0.392633	5.55995	17.6892	17.683	15.9201	11.3862	8.54904	10.8105	10.1179	2.76823	1.49357	1.23541	1.77632	0.370133	0.903341	0.591211	1.24335	1.41921	3.13507	1.9117	0.487128	0.003682	0	0	0	0
94	C=C(C)c1ccccc1	ALPHA-METHYLSTYRENE	167.895	0	0	0	0	0	0	0	0	0	0	0	0	0	0	0	0	0	0	3.98194	12.6037	16.7678	14.5134	12.7271	10.5026	9.44705	11.8142	12.2546	8.54101	11.3392	9.20138	15.0898	11.6025	8.25918	1.00679	0	0	0	0	0	0	0	0	0	0	0	0
95	c1ccc2ccccc2c1	NAPHTHALENE	166.908	0	0	0	0	0	0	0	0	0	0	0	0	0	0	0	0	0	0	1.30036	13.5517	16.6387	15.8262	11.3173	7.8721	10.3186	8.00242	9.64551	11.1816	14.6618	23.7939	20.2482	3.712	0	0	0	0	0	0	0	0	0	0	0	0	0	0
96	C[N+](=O)[O-]	NITROMETHANE	69.9605	0	0	0	0	0	0	0	0	0	0	0	0	0	0	0.749564	3.11397	5.68196	6.95728	5.38663	4.8663	8.34945	4.46371	2.08773	1.27555	1.22917	1.33674	1.03277	2.55352	1.3761	1.46465	5.8353	8.77404	8.28325	5.29919	3.32081	2.38477	2.38083	0.275286	0	0	0	0	0	0	0	0
97	CCC[N+](=O)[O-]	1-NITROPROPANE	112.87	0	0	0	0	0	0	0	0	0	0	0	0	0	0	0	0.264236	4.21538	4.93394	4.59365	3.90544	8.5714	13.5967	12.2482	8.20629	8.36781	6.20361	9.34716	4.14532	1.41632	1.86659	3.81912	8.50595	8.80339	4.99316	3.49467	2.33377	2.81739	0.514802	0	0	0	0	0	0	0	0
98	CCCCCCCCCO	1-NONANOL	223.353	0	0	0	0	0	0	0	0	0	0.248522	0.595714	1.7655	0.197019	0.649576	0.904267	1.22614	0.721958	0.639521	0.739128	1.04144	2.27843	5.8929	20.0653	37.3223	42.3906	32.5573	26.3266	18.7564	14.9234	2.0012	1.56526	1.11573	0.729928	0.881404	1.04853	1.19682	1.21541	1.53098	2.33268	2.20617	1.84158	0.865051	0	0	0	0
99	CCCCCCCC	N-OCTANE	189.793	0	0	0	0	0	0	0	0	0	0	0	0	0	0	0	0	0	0	0	0	0	0.927726	13.4669	31.3622	43.344	31.797	31.1529	22.8038	20.9034	1.27056	0	0	0	0	0	0	0	0	0	0	0	0	0	0	0	0
100	C=CCCCCCC	1-OCTENE	185.24	0	0	0	0	0	0	0	0	0	0	0	0	0	0	0	0	0	0	0	0.694349	4.27403	7.81973	21.1056	30.7456	31.3827	24.8026	22.2	18.3919	13.9668	4.1849	2.60815	2.84542	3.20425	2.17338	2.17473	0.113871	0	0	0	0	0	0	0	0	0	0
101	Cc1ccccc1O	O-CRESOL	141.948	0	0	0	0	0	0	0	0	0.569242	0.30871	0.651668	1.13919	0.385054	0.832252	0.320974	0.545963	1.52403	1.42762	3.44543	11.5586	11.574	12.4518	8.39347	7.7701	8.39525	10.3569	7.53444	4.91807	8.32338	8.14708	9.35809	9.87401	7.33676	4.78112	1.3279	2.34156	2.57627	0.193672	0	0	0	0	0	0	0	0
102	C=CCCCCCCCCCCCCCCCC	1-OCTADECENE	403.721	0	0	0	0	0	0	0	0	0	0	0	0	0	0	0	0	0	0	0	0.109877	2.84149	6.19589	21.9431	62.6772	86.6145	71.8753	57.0448	35.9823	31.1053	3.22551	3.7289	3.50927	3.25375	1.55203	0.024701	0	0	0	0	0	0	0	0	0	0	0
103	Cc1ccc(O)cc1	P-CRESOL	143.403	0	0	0	0	0	0	0	0.250686	0.89582	1.68282	0.38159	0.397665	1.09222	0.958365	1.05336	0.601367	0.182292	0.285388	2.4444	7.60739	11.9863	11.4869	11.7114	8.17555	9.92521	11.974	10.6038	5.63375	9.41195	8.31211	10.8602	8.13743	5.14854	0.913442	2.07827	1.61018	1.89852	2.10103	1.65582	0.005804	0	0	0	0	0	0
104	CCCCC	N-PENTANE	124.302	0	0	0	0	0	0	0	0	0	0	0	0	0	0	0	0	0	0	0	0	0	0.903237	11.6334	21.6503	27.9804	20.0723	20.8485	18.5779	14.736	0.852361	0	0	0	0	0	0	0	0	0	0	0	0	0	0	0	0
105	CCCCCO	1-PENTANOL	135.911	0	0	0	0	0	0	0	0	0	0.252541	0.629514	1.77838	0.165944	0.644987	0.962227	1.11665	0.779242	0.649752	0.78821	0.946349	2.24188	6.07517	17.9736	23.1016	22.7394	16.2987	13.2225	13.5017	6.1914	1.6556	1.63867	1.0859	0.692918	0.920657	1.03467	1.24975	1.1146	1.60052	2.33753	2.16976	1.8243	0.864516	0	0	0	0
106	CCCC(C)=O	2-PENTANONE	129.357	0	0	0	0	0	0	0	0	0	0	0	0	0	0	0	0	0	0.007056	1.95139	7.82588	10.9166	12.3394	15.9449	17.7825	16.8183	12.7128	9.9238	10.3238	2.44053	1.82959	0.780822	0.603624	0.994282	1.67739	1.74139	1.28547	4.76501	4.08897	2.0693	1.78076	0.455579	0	0	0	0	0
107	Oc1ccccc1	PHENOL	121.087	0	0	0	0	0	0	0.207212	0.963898	1.13672	0.648094	0.706692	1.364	0.783092	0.760596	0.841209	0.720668	0.940238	1.56983	3.38343	10.4322	9.5076	7.96904	6.41702	5.33582	5.95655	5.51898	5.36529	5.35848	9.3211	7.75825	10.8522	10.2258	8.71962	2.42979	1.43959	2.28823	2.5035	0.141285	0	0	0	0	0	0	0	0
108	O=C(Cl)Cl	PHOSGENE	87.4585	0	0	0	0	0	0	0	0	0	0	0	0	0	0	0	0	0	0.288828	2.38158	6.79632	2.4845	5.76002	8.74581	3.84942	9.17458	13.7159	17.4902	13.2811	2.96344	3.28436	5.72358	5.48572	1.52002	0	0	0	0	0	0	0	0	0	0	0	0	0
109	CCCO	1-PROPANOL	92.1061	0	0	0	0	0	0	0	0	0	0.258162	0.645107	1.73689	0.202384	0.677325	0.871557	1.24476	0.729678	0.622311	0.769089	1.09772	2.39951	8.33884	14.379	14.8744	11.1279	10.3203	9.14572	9.05297	1.94006	1.48071	1.54312	1.10217	0.709281	0.904337	1.0152	1.28913	1.24686	1.46598	2.37479	2.23209	1.82997	0.761067	0	0	0	0
110	CCC(=O)O	PROPIONIC_ACID	96.2038	0	0	0	0	0	0	8e-05	0.884922	0.881488	0.417896	1.39729	1.40186	0.513121	0.161839	0.296388	0.725052	0.973412	0.670993	2.99391	5.03616	5.01024	8.95098	10.8175	11.0015	8.44574	5.89351	8.31896	3.0678	2.91546	2.8773	3.03976	2.98232	0.957172	4.25203	3.62115	3.58105	5.92259	2.90558	0.596035	0	0	0	0	0	0	0
111	C[C@H]1CO1	1,2-PROPYLENE_OXIDE	83.6613	0	0	0	0	0	0	0	0	0	0	0	0	0	0	0	0	0	0	1.13065	6.42674	11.4179	10.525	11.1386	9.3936	8.21239	9.52557	7.91577	3.62189	1.14311	0.939364	1.9525	0.716683	0.855257	1.85568	1.87601	2.70221	3.87821	2.35332	1.83173	0.615591	0	0	0	0	0	0
112	c1ccncc1	PYRIDINE	105.664	0	0	0	0	0	0	0	0	0	0	0	0	0	0	0	0	0	1.82094	10.5039	12.6295	9.5788	6.85311	5.09811	4.78117	7.04322	3.86531	8.4728	7.01134	11.5668	12.6718	2.43892	1.26103	0.842857	1.59399	1.87325	0.492964	1.24701	1.62315	0.894813	0.769864	1.04076	1.05333	0.568952	0.167096	0	0
113	O=[N+]([O-])O	NITRIC_ACID	59.4379	0	0	0	0	0	0.849176	0.909642	1.53076	0.646175	1.12313	0.436337	0.585357	1.06057	0.717915	0.300299	0.30376	0.649925	1.5411	1.88147	2.51796	1.95371	1.61987	3.44751	1.99785	2.47504	2.03739	2.05815	4.26384	9.6439	12.551	10.5871	9.16122	2.14945	0	0	0	0	0	0	0	0	0	0	0	0	0
114	COC(=O)c1ccccc1O	METHYL_SALICYLATE	176.049	0	0	0	0	0	0	0	0	0	0	0	0	0	0	0	0	0	0.403488	6.91436	15.4848	13.8588	12.1052	14.0661	13.9497	9.98684	10.1001	13.9658	14.0446	13.3994	13.7909	7.69087	3.4658	3.22163	3.47908	4.47354	3.82641	1.49898	0	0	0	0	0	0	0	0	0
115	CC[C@H](C)C(C)(C)O	2,3-DIMETHYL-2-PENTANOL	177.167	0	0	0	0	0	0	0	0	0	0.045604	0.343843	1.01664	0.77259	0.413428	0.882261	1.16725	0.615376	0.469248	1.01327	1.14453	2.78448	10.983	18.6946	21.3288	20.5077	17.252	19.0425	23.5254	12.6825	2.93677	1.47086	1.15601	1.27672	0.123838	0.263073	1.04921	1.62941	1.82975	1.91615	1.84543	0.465451	0.047106	0	0	0	0
116	C=Cc1ccccc1	STYRENE	147.5	0	0	0	0	0	0	0	0	0	0	0	0	0	0	0	0	0	0.62414	6.1552	14.8381	14.9582	11.0864	9.21166	8.15354	7.55133	8.51506	7.89874	10.9455	7.60822	11.0486	16.0507	12.3397	6.12875	1.3702	0	0	0	0	0	0	0	0	0	0	0	0
117	O=C(O)CCc1ccccc1	3-PHENYLPROPANOICACID	192.71	0	0	0	0	0	0	0.067384	1.03842	0.660687	0.640964	1.42609	1.38958	0.345464	0.127354	0.34987	0.924381	0.86825	1.12211	5.11324	13.2633	19.8953	17.9434	12.1174	10.443	10.5268	9.96738	7.94618	6.11473	11.3453	8.34164	12.4016	8.92552	8.72612	5.99563	3.31072	3.7545	5.7154	2.05713	0.213846	0	0	0	0	0	0	0
118	CC(C)(C)O	2-METHYL-2-PROPANOL	114.852	0	0	0	0	0	0	0	0	0	0.10848	0.419415	1.18063	0.52904	0.786452	0.566831	1.1519	0.988908	0.365604	1.1492	1.03187	3.86863	13.0462	12.861	17.5423	9.01682	8.883	12.2326	16.4633	4.96993	1.13944	1.15446	0.548747	1.04319	0.762811	1.05985	0.40777	0.662871	2.83171	1.64545	1.06384	2.3811	1.33304	0.004339	0	0	0
119	CCCCCCCCCCCCCC	N-TETRADECANE	321.26	0	0	0	0	0	0	0	0	0	0	0	0	0	0	0	0	0	0	0	0	0	0.929968	16.8655	51.7192	72.9614	55.8589	51.897	32.4067	32.0089	2.35075	0	0	0	0	0	0	0	0	0	0	0	0	0	0	0	0
120	C1CC[C@H]2CCCC[C@@H]2C1	TRANS-DECAHYDRONAPHTHALENE	198.106	0	0	0	0	0	0	0	0	0	0	0	0	0	0	0	0	0	0	0	0	0	0	6.72275	31.5583	42.6516	37.6257	28.1685	22.0255	15.017	0.679583	0	0	0	0	0	0	0	0	0	0	0	0	0	0	0	0
121	c1ccc2c(c1)CCCC2	1,2,3,4-TETRAHYDRONAPHTHALENE	179.807	0	0	0	0	0	0	0	0	0	0	0	0	0	0	0	0	0	0	0.028096	4.04282	7.37109	17.8335	21.7635	22.1539	19.6776	17.4726	15.5168	10.2275	6.74735	6.6501	4.84506	10.858	4.85404	5.51852	0.862359	0	0	0	0	0	0	0	0	0	0	0
122	ClC(Cl)(Cl)Cl	CARBON_TETRACHLORIDE	127.862	0	0	0	0	0	0	0	0	0	0	0	0	0	0	0	0	0	1.0756	1.8053	9.97125	1.20461	1.65932	13.7881	7.19955	0.662615	12.0226	29.1952	43.3343	11.7505	0	0	0	0	0	0	0	0	0	0	0	0	0	0	0	0	0
123	OC[C@H]1CCCO1	TETRAHYDROFURFURYL_ALCOHOL	133.058	0	0	0	0	0	0	0	0	0	0.384133	1.49552	1.23033	0.37008	0.86048	0.960686	0.982713	0.947365	0.830733	0.664815	0.816949	4.04102	15.1653	22.6434	21.3228	12.3091	10.4558	10.576	3.40098	2.77795	2.22804	1.59397	3.1632	0.880005	2.01513	2.39656	3.77633	2.64617	3.20655	4.78695	2.22725	0.219937	0	0	0	0	0
124	C1CCOC1	TETRAHYDROFURAN	99.7117	0	0	0	0	0	0	0	0	0	0	0	0	0	0	0	0	0	0	0	0	3.78146	13.5664	19.5692	20.5609	13.7549	11.8683	8.99095	3.00654	1.715	0.758151	1.06153	1.57949	0.766509	0.162931	1.99019	0.933623	1.49109	1.15772	2.22191	1.91972	1.75567	0.007908	0	0	0	0
125	Cc1ccccc1	TOLUENE	132.248	0	0	0	0	0	0	0	0	0	0	0	0	0	0	0	0	0	0	0.537516	7.69806	14.1503	15.2634	13.6424	8.93276	9.30174	10.8312	12.3796	5.08637	9.17381	5.99953	8.31053	8.95118	7.96308	2.68456	0.004387	0	0	0	0	0	0	0	0	0	0	0
126	CCN(CC)CC	TRIETHYLAMINE	162.433	0	0	0	0	0	0	0	0	0	0	0	0	0	0	0	0	0	0	0	0	1.64041	9.98933	15.5396	21.7195	26.4443	29.9089	24.6166	22.3353	3.61492	3.19255	1.71769	0.168321	0.180469	0.130631	0.37326	1.2178	0	0	0	0.844414	1.62215	0.078597	0.193663	0	0	0
127	ClCC(Cl)Cl	1,1,2-TRICHLOROETHANE	127.444	0	0	0	0	0	0	0	0	0	0	0	0	0	1.05496	2.6942	4.03833	6.0134	3.05715	4.00138	2.44939	3.49887	4.02519	6.1723	4.70376	6.53333	11.0923	8.64764	5.44595	17.7896	22.9039	15.3552	5.26277	0.065809	0	0	0	0	0	0	0	0	0	0	0	0	0
128	ClC(Cl)=C(Cl)Cl	TETRACHLOROETHYLENE	141.316	0	0	0	0	0	0	0	0	0	0	0	0	0	0	0	0	0	0.328339	1.81922	7.34673	4.56247	0.288272	10.2604	15.0026	9.6544	11.737	33.8017	36.9721	15.5468	0	0	0	0	0	0	0	0	0	0	0	0	0	0	0	0	0
129	CC(Cl)(Cl)Cl	1,1,1-TRICHLOROETHANE	127.338	0	0	0	0	0	0	0	0	0	0	0	0	0	0	0	0	0.199402	4.10429	3.99844	6.70408	6.42993	9.80769	6.50934	5.6512	12.1201	6.51318	4.97615	16.064	20.4359	26.1445	2.93291	0	0	0	0	0	0	0	0	0	0	0	0	0	0	0
130	ClC=C(Cl)Cl	TRICHLOROETHYLENE	120.084	0	0	0	0	0	0	0	0	0	0	0	0	0	0.354471	2.33026	1.27008	0.898571	1.54973	1.37447	2.34718	6.84024	2.95934	3.12127	10.4512	10.9947	7.6107	20.6024	27.8878	23.3459	6.92998	0	0	0	0	0	0	0	0	0	0	0	0	0	0	0	0
131	FC(F)(F)c1ccccc1	BENZOTRIFLUORIDE	154.388	0	0	0	0	0	0	0	0	0	0	0	0	0	0	0	0	0.316356	3.71341	10.0049	10.9678	8.34479	5.6865	6.08928	3.68135	6.07268	8.38162	12.9296	20.4591	37.5045	18.9159	4.56382	0	0	0	0	0	0	0	0	0	0	0	0	0	0	0
132	CC(C)CCC(C)(C)C	2,2,5-TRIMETHYLHEXANE	212.467	0	0	0	0	0	0	0	0	0	0	0	0	0	0	0	0	0	0	0	0	0	1.56325	21.9942	33.3573	41.8682	22.1476	22.9227	25.8238	27.5522	4.37038	0	0	0	0	0	0	0	0	0	0	0	0	0	0	0	0
133	CC(C)C(C)(C)C	2,2,3-TRIMETHYLBUTANE	166.638	0	0	0	0	0	0	0	0	0	0	0	0	0	0	0	0	0	0	0	0	0	2.12113	21.3643	23.7858	29.0145	17.0438	18.629	20.0679	23.0078	4.1265	0	0	0	0	0	0	0	0	0	0	0	0	0	0	0	0
134	C=COC(C)=O	VINYL_ACETATE	113.025	0	0	0	0	0	0	0	0	0	0	0	0	0	0	0	0	0.060972	3.05242	8.32252	11.1636	9.38385	7.65717	9.91488	12.8736	8.90127	6.9084	4.69538	4.35516	5.52647	6.17043	7.30963	4.93765	5.51059	1.9103	1.91722	5.39945	2.65789	1.17789	0.078918	0	0	0	0	0	0	0
135	Cc1cccc(C)c1	M-XYLENE	153.766	0	0	0	0	0	0	0	0	0	0	0	0	0	0	0	0	0	0	0.063961	3.71369	14.1762	18.3213	18.7915	11.8364	10.6574	14.4407	18.8245	8.15732	7.30617	6.75129	6.17172	10.2672	6.61066	3.65982	0.222083	0	0	0	0	0	0	0	0	0	0	0
136	CC[N+](=O)[O-]	NITROETHANE	90.7104	0	0	0	0	0	0	0	0	0	0	0	0	0	0	0	0.58739	5.1691	5.33842	4.49245	6.31276	10.8459	7.7878	7.10237	4.63442	4.848	5.36748	3.28537	2.18071	1.81864	1.953	3.62525	8.54908	8.5441	5.22261	3.48032	2.4787	2.66636	0.564171	0	0	0	0	0	0	0	0
137	CN	METHYLAMINE	53.5803	0	0	0	0	0	0	0	0	0	0	0	0	0	0	0.531745	2.52727	2.44501	1.90063	2.60098	2.46192	4.34267	5.89915	6.18464	5.77491	5.72538	5.90082	7.68045	3.75113	1.59894	1.60599	0.475662	0.542262	1.47638	0.652156	0.271419	0.752831	1.01274	0.723078	0.305892	0.2528	1.05302	0.458167	1.12604	0.241541	0.97213	0.259761
138	CNC	DIMETHYLAMINE	75.651	0	0	0	0	0	0	0	0	0	0	0	0	0	0	0.299324	1.82767	0.915296	0.882325	1.27092	0.64577	2.71708	7.79744	9.68894	13.3612	12.6636	10.3863	13.3271	4.17839	1.07258	1.10794	1.59079	0.711841	0.603672	0.226628	0.863183	0.913828	0.704626	0.188938	1.32313	0.385198	0.327583	0.318619	0.992433	1.03344	0.188999	0.41912
139	Fc1ccccc1	FLUOROBENZENE	118.588	0	0	0	0	0	0	0	0	0	0	0	0	0	0	0	0	0.166443	2.94447	8.99243	9.93336	8.94517	7.24475	5.07747	5.93649	4.13064	5.97928	8.85095	10.7316	11.6173	13.8925	18.1048	6.52706	0.036685	0	0	0	0	0	0	0	0	0	0	0	0	0
140	C=CCN=C=S	ALLYLISOTHIOCYANATE	130.794	0	0	0	0	0	0	0	0	0	0	0	0	0	0	0	0	0.814437	4.41526	6.36467	9.20207	10.0029	7.95877	8.59208	6.90524	7.95972	11.0447	11.5365	11.6381	12.3378	10.4251	12.7875	11.8814	2.02488	0.97536	0	0	0	0	0	0	0	0	0	0	0	0
141	C1OCOCO1	TRIOXANE	100.09	0	0	0	0	0	0	0	0	0	0	0	0	0	0	0	0	1.26498	7.71261	9.95446	12.2444	9.03224	10.3649	6.80685	2.80841	3.89359	3.18501	2.8413	2.57997	3.70821	1.64668	2.27959	3.18723	4.07881	3.80534	3.78462	6.19516	7.27787	3.29593	0	0	0	0	0	0	0	0
142	CCCCOC	METHYL_N-BUTYL_ETHER	136.655	0	0	0	0	0	0	0	0	0	0	0	0	0	0	0	0	0	0	0	0.914078	1.91991	9.79352	24.211	25.6615	24.4139	17.7779	11.8477	13.3628	4.95941	1.02704	1.20759	1.4585	0.869454	0.820725	0.758877	1.18455	2.52606	1.31766	1.40959	2.16531	0.208859	0	0	0	0	0
143	O=C(Cl)C(Cl)(Cl)Cl	TRICHLOROACETYL_CHLORIDE	153.58	0	0	0	0	0	0	0	0	0	0	0	0	0	0	0	0	0	0.934741	2.116	10.4717	3.45129	4.82218	15.5308	8.40483	4.40865	21.7227	27.6559	30.8676	8.61218	4.02666	3.83789	4.98362	1.40348	0.023561	0	0	0	0	0	0	0	0	0	0	0	0
144	ClC(Cl)C(Cl)Cl	1,1,2,2-TETRACHLOROETHANE	149.629	0	0	0	0	0	0	0	0	0	0	0	0	1.14013	5.14188	1.07261	2.87166	2.98508	0.381254	1.15484	2.07036	3.20799	9.62702	4.59088	5.50559	17.7934	7.7127	2.82841	21.7868	27.5969	29.3846	3.90497	0	0	0	0	0	0	0	0	0	0	0	0	0	0	0
145	CCOC(=O)CC	ETHYL_PROPIONATE	138.944	0	0	0	0	0	0	0	0	0	0	0	0	0	0	0	0	0	0	0.858682	5.40634	12.4237	18.4754	18.984	17.9257	16.6095	11.9663	12.7059	6.11148	2.52654	2.18456	2.42575	2.02209	3.58846	2.05847	2.8575	2.94341	3.86312	4.60607	1.5439	0.133452	0	0	0	0	0	0
146	CC(=O)OCCC(C)C	ISOPENTYL_ACETATE	184.381	0	0	0	0	0	0	0	0	0	0	0	0	0	0	0	0	0	0.390366	3.15794	5.20193	9.79887	14.9463	24.8246	30.374	23.3367	15.1742	12.4683	14.6263	6.45487	2.59587	1.8698	1.89163	3.55292	2.46672	3.06172	2.54712	4.4547	4.11379	2.15103	0.32671	0	0	0	0	0	0
147	CCCCOC(=O)CC	N-BUTYL_PROPIONATE	182.507	0	0	0	0	0	0	0	0	0	0	0	0	0	0	0	0	0	0	0.991614	4.32561	7.7378	18.2272	27.773	28.9181	24.0792	16.8527	16.7957	14.6825	3.83164	2.15551	2.81775	1.84415	3.26836	2.02662	3.51708	2.36472	3.50171	5.16496	1.48503	0.100758	0	0	0	0	0	0
148	C=CCl	VINYL_CHLORIDE	76.4248	0	0	0	0	0	0	0	0	0	0	0	0	0	0	0	0.371973	2.21207	4.13123	4.74227	5.46596	2.45801	4.23583	5.06367	4.72485	4.48636	6.70804	5.60432	4.07867	9.81344	13.3	12.5917	3.20638	0.254945	0	0	0	0	0	0	0	0	0	0	0	0	0
149	COCCOC	1,2-DIMETHOXYETHANE	126.379	0	0	0	0	0	0	0	0	0	0	0	0	0	0	0	0	0	0	0.055154	2.77185	7.48004	25.9089	21.0446	15.9258	18.4777	11.7471	5.94427	2.70727	2.13299	3.75502	1.9781	1.54198	1.68114	1.63557	3.56005	4.73273	1.46137	3.7068	3.72383	0.294453	0	0	0	0	0	0
150	FC(F)(Cl)C(Cl)(Cl)Cl	1,1,1,2-TETRACHLORODIFLUOROETHANE	164.386	0	0	0	0	0	0	0	0	0	0	0	0	0	0	0	0	0	1.21151	2.17858	10.1046	0.562065	3.57369	13.59	5.1833	1.71482	23.7344	38.1454	56.1207	2.06703	0	0	0	0	0	0	0	0	0	0	0	0	0	0	0	0	0
151	CC(C)(C)Cl	TERT-BUTYL_CHLORIDE	125.364	0	0	0	0	0	0	0	0	0	0	0	0	0	0	0	0	0	0	0	1.39312	13.001	15.4284	15.4175	9.35454	11.8563	16.98	12.9287	2.14894	3.4471	4.41143	2.41642	5.40024	8.84572	7.02134	0.224288	0	0	0	0	0	0	0	0	0	0	0
152	FC(F)(Cl)C(F)(Cl)Cl	1,1,2-TRICHLOROTRIFLUOROETHANE	150.87	0	0	0	0	0	0	0	0	0	0	0	0	0	0	0	0	0	1.10278	2.62375	6.59727	0.16996	4.86886	9.58614	2.89635	3.36352	27.8838	53.6755	36.3369	0	0	0	0	0	0	0	0	0	0	0	0	0	0	0	0	0	0
153	OO	HYDROGEN_PEROXIDE	38.883	0	0	0	0	0	0	0	0.544683	2.01456	2.93423	1.98456	1.05893	2.03406	2.38488	0.708082	1.43246	1.31628	0.825539	1.19924	0.382747	0.60787	1.51377	0.652524	1.67272	0.739809	0.967858	2.78473	1.20688	1.33618	1.2456	1.17287	3.2862	2.04985	3.23747	5.71983	3.96675	3.8223	2.51061	0.832913	0	0	0	0	0	0	0
154	C1CCCNCC1	HEXAMETHYLENEIMINE	144.555	0	0	0	0	0	0	0	0	0	0	0	0	0	0	0.140903	0.693203	2.045	0.345456	1.13803	1.44947	0.983697	3.17732	10.9969	23.0269	26.8133	23.4674	21.1911	15.5849	5.56164	0.826188	0.957221	0.863712	0.383883	0.559658	0.517871	0.540679	0.105917	0.335982	0.692966	0.601459	0.314567	0.743165	0.405809	0.575697	0.224994	0.243997
155	C=O	FORMALDEHYDE	43.4832	0	0	0	0	0	0	0	0	0	0	0	0	0	0	0	0	0	1.68517	12.0405	9.41715	4.31689	1.84844	2.16622	1.74716	1.4936	2.36619	1.27781	0.940418	0.397643	1.83026	0.902491	1.88015	1.38458	3.71473	4.14842	3.58324	3.14057	1.41716	0.189211	0	0	0	0	0	0	0
156	CNC=O	N-METHYLFORMAMIDE	80.0767	0	0	0	0	0	0	0	0	0	0	0.806354	1.38122	0.860596	1.39306	1.19532	0.628611	0.124783	0.978571	6.68698	8.69515	9.89941	7.62327	5.81229	9.75321	6.13974	2.84475	1.97141	2.33681	3.66223	1.87594	0.622619	0.456789	1.6018	1.35291	1.27348	0.620011	1.94181	1.95994	6.34401	4.31063	2.76857	0.524657	0	0	0	0
157	CC(=O)N(C)C	N,N-DIMETHYLACETAMIDE	122.708	0	0	0	0	0	0	0	0	0	0	0	0	0	0	0	0	0	0	1.94325	9.27383	14.7111	17.1752	12.0677	15.9699	15.2305	11.4344	4.54066	4.92048	2.40358	2.16367	1.49043	0.182283	0.756947	0.528541	0.31197	1.2922	2.16672	2.1975	1.77644	5.68373	3.00066	1.77828	0.103762	0	0	0
158	C=CC#N	ACRYLONITRILE	80.2467	0	0	0	0	0	0	0	0	0	0	0	0	0	0	0.171199	2.89502	5.66116	6.93309	4.68487	4.48936	2.92268	4.68661	5.84282	5.72058	5.4083	6.31465	6.03512	6.58403	2.80183	1.75313	1.06653	2.35859	2.26186	4.63685	4.74926	4.54834	3.8601	2.04393	0.08894	0	0	0	0	0	0	0
159	C=CC=O	ACROLEIN	80.762	0	0	0	0	0	0	0	0	0	0	0	0	0	0	0	0	0.867192	4.75356	9.04562	8.88535	5.31213	5.78032	5.95109	7.82189	6.02882	4.82229	7.93555	3.63413	3.78316	1.73638	0.960456	0.928623	1.51574	1.99398	2.52534	4.07494	4.36652	2.81456	2.1599	0.46376	0	0	0	0	0	0
160	C=C(C)C(=O)O	METHACRYLIC_ACID	112.363	0	0	0	0	0	0	0.055787	1.13527	0.575429	0.541899	1.70485	1.15459	0.397747	0.15799	0.35017	0.785919	0.91198	1.2788	2.74468	5.95242	7.46239	7.41148	6.88543	10.5299	10.7889	11.2524	8.75027	5.04939	6.47408	5.80582	3.34399	2.25434	2.60251	4.1704	2.90647	1.4427	6.83754	2.4532	0.27004	0	0	0	0	0	0	0
161	CC(=O)OC(C)=O	ACETIC_ANHYDRIDE	123.685	0	0	0	0	0	0	0	0	0	0	0	0	0	0	0	0	0.547083	5.11766	9.09046	13.2363	11.3227	11.8114	13.3468	15.3036	7.9011	3.13747	2.03886	3.80523	2.08466	3.21616	2.56319	2.88984	2.87476	3.62472	5.53933	9.35255	5.46136	2.59513	1.89063	0.190976	0	0	0	0	0	0
162	CCCC(=O)O	N-BUTYRIC_ACID	117.708	0	0	0	0	0	0	0	0.407552	1.30918	0.133749	1.42006	1.2874	0.836813	0.236235	0.279599	0.379119	1.20909	0.753513	1.23231	5.14751	4.07542	7.48798	15.6939	16.222	12.3579	9.97679	9.62349	7.10334	3.82065	2.47154	3.52355	2.50977	1.13754	5.16074	2.93792	4.6076	5.43364	2.22981	0.209789	0	0	0	0	0	0	0
163	CCC	PROPANE	80.703	0	0	0	0	0	0	0	0	0	0	0	0	0	0	0	0	0	0	0	0	0	0.916731	10.8541	13.9089	18.5866	11.9433	15.0274	15.3606	10.3729	0.655236	0	0	0	0	0	0	0	0	0	0	0	0	0	0	0	0
164	CCCOC(C)=O	N-PROPYL_ACETATE	140.075	0	0	0	0	0	0	0	0	0	0	0	0	0	0	0	0	0	0.144084	3.2008	5.63511	9.92698	17.5241	17.9747	21.2538	16.9759	13.526	9.40318	6.66202	2.47718	2.46295	1.54027	2.29287	3.3891	2.04183	3.62012	2.54503	4.75189	3.94827	2.06688	0.152459	0	0	0	0	0	0
165	CCCCCCCCCCCCCCCC(=O)O	N-HEXADECANOIC_ACID	381.669	0	0	0	0	0	0.284264	0.886132	0.988654	0.5078	0.902327	1.26561	1.07672	0.189375	0.373497	1.16031	1.28019	1.17085	2.56919	4.24534	3.82091	4.07716	5.19719	23.9349	56.2297	71.726	53.1585	46.1096	27.4497	26.4856	3.0052	1.99945	2.78525	1.63981	2.61576	4.15804	6.54085	6.73197	2.97833	2.22333	0.629142	0	0	0	0	0	0
166	CCCCN	N-BUTYLAMINE	118.262	0	0	0	0	0	0	0	0	0	0	0	0	0	0	0.1569	1.39944	3.4784	1.21368	2.78266	2.35819	3.05056	3.46991	12.8556	19.3004	22.2172	14.9863	13.6704	11.6644	6.27595	1.79442	0.990738	0.537865	1.1454	1.03363	0.012455	0.833406	0.632063	0.363848	0.158787	0.435516	2.09545	0.337714	0.423999	0.347837	0.790956	0.510312
167	O=C1CCCC1	CYCLOPENTANONE	113.801	0	0	0	0	0	0	0	0	0	0	0	0	0	0	0	0	0	0	1.33084	6.78732	9.80223	17.6259	17.2237	13.9428	11.2397	10.6103	9.75426	1.44328	0.397099	2.40202	0.499085	0.751818	0.786443	1.87436	1.74706	2.05691	5.43231	3.38356	2.90811	1.94741	0.363436	0	0	0	0	0
168	CCCCCCCC/C=C\CCCCCCCC(=O)O	OLEIC_ACID	420.144	0	0	0	0	0	0	0	0.415178	1.3108	0.145355	1.39145	1.30004	0.829446	0.236836	0.279198	0.371595	1.20748	0.75914	1.37219	5.03991	4.07369	8.64069	34.3123	67.66	76.6475	57.432	38.4474	33.0456	21.8023	5.34936	6.24805	6.04068	3.66915	7.06781	3.81268	4.43615	5.55269	2.28793	0.251516	0	0	0	0	0	0	0
169	C1CCNCC1	PIPERIDINE	122.328	0	0	0	0	0	0	0	0	0	0	0	0	0	0	0.151494	1.21709	1.83073	0.211922	1.77138	0.352992	1.39622	4.53082	13.036	18.205	24.4723	21.97	16.9697	9.69352	2.32733	1.95406	1.01789	0.904135	0.080757	0.425943	0.413531	0.505875	0.403886	0.762596	0.556607	0.425835	0.942967	0.318073	0.311179	1.20265	0.283823	0.341535
170	FC(F)Cl	CHLORODIFLUOROMETHANE	76.422	0	0	0	0	0	0	0	0	0	0	0	0	1.68108	3.48441	1.41862	1.189	1.08428	0.501735	1.43131	1.60281	2.32586	3.35767	1.37854	3.80784	3.73963	2.14637	9.09448	18.2262	28.0135	8.87469	0	0	0	0	0	0	0	0	0	0	0	0	0	0	0	0
171	FC(F)(Cl)Cl	DICHLORODIFLUOROMETHANE	98.2407	0	0	0	0	0	0	0	0	0	0	0	0	0	0	0	0	0	0.74125	1.60326	4.64601	0.037865	2.88383	6.81922	2.83888	3.39576	24.5031	38.2627	24.8409	0	0	0	0	0	0	0	0	0	0	0	0	0	0	0	0	0	0
172	FC(F)=C(F)C(F)(F)F	HEXAFLUOROPROPYLENE	123.294	0	0	0	0	0	0	0	0	0	0	0	0	0	0	0	0	0	0	2.01797	5.61278	4.46198	4.2523	4.03562	4.5517	9.765	22.7657	37.5974	35.277	3.83098	0	0	0	0	0	0	0	0	0	0	0	0	0	0	0	0	0
173	FC1(F)C(F)(F)C(F)(F)C1(F)F	OCTAFLUOROCYCLOBUTANE	156.685	0	0	0	0	0	0	0	0	0	0	0	0	0	0	0	0.486269	1.4826	1.50527	2.34205	2.0984	1.29135	3.95181	4.7992	3.24924	11.8292	27.0547	71.6972	23.7066	0	0	0	0	0	0	0	0	0	0	0	0	0	0	0	0	0	0
174	NNc1ccccc1	PHENYLHYDRAZINE	141.333	0	0	0	0	0	0	0	0	0	0	0	0.139649	1.24068	2.74746	4.92471	4.10648	3.34842	4.91652	4.22259	7.01059	9.26553	9.51945	8.5704	5.86337	5.4708	6.31236	5.49379	5.46974	6.6041	8.73853	7.14099	11.8899	9.35733	8.80751	3.20477	0.923502	1.93192	1.52523	0.939064	0.488635	0.008915	0	0	0	0	0
175	O=C1CCCCC1	CYCLOHEXANONE	133.577	0	0	0	0	0	0	0	0	0	0	0	0	0	0	0	0	0	0	0.334411	4.68007	7.2676	18.3668	21.7381	18.9139	16.9238	13.9475	9.51275	3.29296	1.014	1.42196	0.267733	0.637234	0.893253	1.21734	1.88648	2.11414	5.28816	3.95574	2.12023	2.47114	0.391076	0	0	0	0	0
176	O=C1CCCCCN1	EPSILON-CAPROLACTAM	148.708	0	0	0	0	0	0	0	0	0	0	0	0.676719	1.20351	0.389514	2.01947	0.355423	1.20184	0.940758	1.54284	4.17476	7.70125	16.3032	20.7303	21.2955	15.8266	13.1022	9.58618	4.53313	2.13565	2.64189	0.904411	0.849293	0.512229	1.12738	1.14231	1.78146	0.514565	2.18101	2.55819	5.71176	3.16326	3.14213	0.143154	0	0	0
177	OC1CCCCC1	CYCLOHEXANOL	139.417	0	0	0	0	0	0	0	0	0	0.153111	0.388257	1.74886	0.241744	0.602426	0.806304	1.5467	0.640749	0.681325	0.442953	1.4911	0.810946	4.03077	18.0701	24.1001	23.5912	15.4341	14.8164	12.4249	3.37619	1.46149	0.942075	0.557737	1.69062	0.31566	1.01369	0.611489	1.66769	2.36445	0.956265	1.90383	2.61227	0.877702	0	0	0	0
178	CC(C)[N+](=O)[O-]	2-NITROPROPANE	113.318	0	0	0	0	0	0	0	0	0	0	0	0	0	0	0	0.462101	3.06498	2.40689	2.3024	7.32159	12.3834	12.6683	10.0333	7.27379	9.42225	11.9111	4.88312	1.51784	3.03049	1.69572	3.8229	8.26455	10.1173	3.8015	2.35691	2.10794	2.9474	0.686482	0	0	0	0	0	0	0	0
179	C=CCCC	1-PENTENE	119.253	0	0	0	0	0	0	0	0	0	0	0	0	0	0	0	0	0	0	0	0.71763	4.30562	8.76671	19.1223	18.5469	16.1858	13.2398	14.4197	13.3832	7.19335	4.0585	2.4447	2.7455	3.28184	2.1286	2.15391	0.11016	0	0	0	0	0	0	0	0	0	0
180	BrC(Br)Br	TRIBROMOMETHANE	125.38	0	0	0	0	0	0	0	0	0	0	0	0.271114	2.69861	1.05395	0.734348	1.786	0.484134	1.73285	2.66726	7.63449	1.50064	1.82806	12.4069	8.39602	1.66624	2.40636	14.6137	21.066	23.9949	25.6618	0	0	0	0	0	0	0	0	0	0	0	0	0	0	0	0
181	C=C(C)C(=O)OC	METHYL_METHACRYLATE	134.588	0	0	0	0	0	0	0	0	0	0	0	0	0	0	0	0	0	0.475325	4.1057	10.1343	12.4123	12.0115	12.0998	15.0057	12.795	13.129	10.8504	5.22447	5.4332	6.65674	4.30479	2.48753	2.75508	1.04625	3.47741	1.4866	3.97197	4.79093	0.422338	0	0	0	0	0	0	0
182	CC=C(C)C	2-METHYL-2-BUTENE	117.658	0	0	0	0	0	0	0	0	0	0	0	0	0	0	0	0	0	0	0	0.360697	2.5801	13.5564	14.8227	19.2431	11.9659	12.4047	17.7037	14.9331	7.03513	3.33676	3.52862	2.86981	2.26452	2.06929	1.31727	0	0	0	0	0	0	0	0	0	0	0
183	C=C(C)CC	2-METHYL-1-BUTENE	118.27	0	0	0	0	0	0	0	0	0	0	0	0	0	0	0	0	0	0	0	0.050601	2.44145	13.3248	18.484	17.8269	12.3019	13.7986	16.1129	12.0597	4.60994	4.64607	3.33848	3.00689	2.22715	2.32854	2.27112	0.426414	0	0	0	0	0	0	0	0	0	0
184	CCCCCCCCCCCCCCCCCC(=O)O	N-OCTADECANOIC_ACID	425.424	0	0	0	0	0	0.277826	0.892595	0.988629	0.39343	0.830161	1.46067	1.07333	0.101278	0.54157	0.645959	1.71159	1.31558	2.56893	4.24383	3.38861	4.45827	5.28621	25.2363	62.948	81.0175	61.5901	52.5055	30.0397	30.6599	3.53002	1.96273	2.82363	1.59245	2.79785	4.10853	6.81082	6.63931	2.88903	2.17151	0.572894	0	0	0	0	0	0
185	CC(C)CCO	3-METHYL-1-BUTANOL	135.989	0	0	0	0	0	0	0	0	0	0.206216	0.694093	1.91526	0.383743	0.543329	0.88654	1.17681	0.904376	0.486466	1.14135	0.545286	0.510867	5.21668	18.4697	23.3893	22.6905	13.5892	11.4813	16.236	7.10226	1.22698	0.612749	1.34911	1.17728	0.534281	0.731251	0.708248	2.67724	1.51642	1.6617	2.45753	1.88193	0.185067	0	0	0	0
186	CCCCCC(=O)O	N-HEXANOIC_ACID	161.232	0	0	0	0	0	0	0	0.40566	1.3123	0.107833	1.44308	1.2807	0.841839	0.241284	0.279092	0.363179	1.21093	0.77814	1.81242	4.28679	4.03993	5.75546	14.4015	23.1247	24.3863	15.6872	17.7578	12.4342	6.17733	2.8168	2.9993	2.43716	1.36417	5.3718	3.09528	4.16526	5.26887	1.55493	0.074771	0	0	0	0	0	0	0
187	CCCCCCCC(=O)O	N-OCTANOIC_ACID	205.183	0	0	0	0	0	0	0	0.43682	1.28348	0.046195	1.61889	1.24217	0.80309	0.228132	0.305086	0.404138	1.06612	0.882883	1.07328	4.18624	3.77725	6.38069	19.0008	32.3312	32.7073	24.0605	21.229	15.4954	8.38475	2.838	2.09817	2.91961	2.35011	4.60207	2.07494	2.83612	6.14941	2.87073	1.30435	0.127516	0	0	0	0	0	0
188	Nc1ccc(-c2ccc(N)cc2)cc1	BENZIDINE	234.47	0	0	0	0	0	0	0	0	0	0	0.5312	3.14945	5.84155	3.55669	4.58194	4.3021	5.16788	6.38527	9.63944	12.0582	13.0422	9.44618	8.32064	9.41212	6.51268	4.8324	9.82648	9.63069	8.93412	12.0722	12.8397	22.3159	22.999	15.621	4.55989	1.63445	0.256289	0	0	0	0	0	0	0	0	0
189	O=C(Cl)CCl	CHLOROACETYL_CHLORIDE	109.426	0	0	0	0	0	0	0	0	0	0	0	0	0.09795	3.70644	4.17877	3.16617	3.81519	3.17659	2.13338	1.58596	3.03743	2.73131	6.79269	4.69241	6.39846	8.69687	5.66988	8.53004	17.0154	10.4572	11.4562	6.11113	5.86776	2.30008	0.195428	0	0	0	0	0	0	0	0	0	0	0
190	CCOCCO	2-ETHOXYETHANOL	124.711	0	0	0	0	0	0	0	0	0.084074	0.559313	1.65391	0.490983	0.701906	0.745962	1.12275	1.02942	0.671999	0.831985	1.07002	2.18704	6.49267	16.8091	19.9428	14.6586	13.8008	9.87284	10.5211	5.97105	2.84519	1.89894	2.14243	1.68356	1.50956	1.6726	2.2972	4.53939	2.70861	3.0338	3.95484	2.36764	1.05889	0	0	0	0	0
191	CC(C)CN	ISOBUTYLAMINE	118.527	0	0	0	0	0	0	0	0	0	0	0	0	0	0	0.221025	1.76488	2.57474	1.45808	2.18647	3.29181	2.42411	4.82371	13.4726	17.665	20.0317	13.5167	11.0323	13.9549	7.36079	1.60548	0.730607	0.277838	1.04839	0.891901	0.716055	0.761763	0.778768	0.049679	0.132592	0.543492	1.37667	0.690302	0.384624	0.487485	0.781651	0.375743
192	OCc1ccco1	FURFURYL_ALCOHOL	120.519	0	0	0	0	0	0	0	0	0.07964	0.458736	1.3718	0.837701	0.173682	0.902812	0.892484	1.63401	1.92115	4.45098	6.2045	9.28057	8.76036	7.06457	7.89065	6.35494	6.76598	5.67424	4.59962	6.98029	7.10864	7.81233	8.92165	6.78281	5.77004	2.86351	2.07793	1.01443	1.55636	1.75329	2.07458	1.7924	0.403005	0	0	0	0	0
193	Cc1cccc(O)c1C	2,3-XYLENOL	161.863	0	0	0	0	0	0	0	0	0.722783	0.592339	0.276227	0.866388	1.08452	1.02648	0.213205	0.564295	0.862396	1.21682	1.9045	6.87631	13.6073	14.597	13.3022	12.0946	12.1925	13.1972	10.0255	7.07638	5.61071	8.24239	8.10105	9.59929	7.12678	5.85195	1.52223	2.37073	2.6949	0.66979	0	0	0	0	0	0	0	0
194	Cc1ccc(O)c(C)c1	2,4-XYLENOL	163.964	0	0	0	0	0	0	0	0	0.506537	0.297923	0.621499	0.967	0.614069	0.783033	0.405007	0.399067	1.25049	1.62349	2.41798	8.74122	11.162	16.5345	12.2769	10.5684	10.3702	14.0053	14.3017	7.44411	7.69175	7.40492	9.15195	10.1512	7.26132	3.98426	1.08117	2.39233	2.67227	0.689824	0	0	0	0	0	0	0	0
195	Cc1cccc(C)c1O	2,6-XYLENOL	162.603	0	0	0	0	0	0	0	0	0.31988	0.452504	0.623414	1.11643	0.260352	0.599357	0.568352	0.97227	0.883374	1.56882	2.23371	7.69032	11.2588	15.2976	13.0545	10.6394	10.8699	13.7553	12.6806	9.46307	6.58192	10.1595	6.56411	8.18729	7.25351	6.86523	2.62967	1.38756	1.34922	0.017075	0	0	0	0	0	0	0	0
196	Cc1cc(C)cc(O)c1	3,5-XYLENOL	164.796	0	0	0	0	0	0	0.014558	0.712465	1.28609	0.527188	0.768627	1.31383	0.940848	0.57662	0.70614	0.931862	0.659364	1.29281	1.512	2.94541	12.8567	14.6812	16.096	10.2066	10.0761	12.839	17.5806	9.13308	5.34302	7.79745	9.9688	10.2942	7.74412	3.914	0.933281	2.42814	2.6027	0.864198	0	0	0	0	0	0	0	0
197	C=C(C)C#N	METHACRYLONITRILE	101.704	0	0	0	0	0	0	0	0	0	0	0	0	0	0	0	0	1.44782	4.20578	7.84258	8.20674	7.91695	6.25415	7.40128	9.55804	13.8719	7.48386	5.31278	6.51452	3.63583	1.8113	1.30002	2.05459	2.16613	4.45791	4.50811	4.83796	4.12875	2.25876	0.13249	0	0	0	0	0	0	0
198	C[C@H](O)CO	1,2-PROPYLENE_GLYCOL	102.477	0	0	0	0	0	0	0	0	0.168502	0.673325	1.76446	0.337864	0.604969	1.29681	1.67766	2.03725	1.24198	0.705285	1.30796	5.43005	8.77537	13.9337	11.0291	7.76632	7.31062	6.0861	8.90194	3.7584	1.85243	2.30127	2.1812	1.18209	2.51338	1.20674	2.93593	2.15635	1.80077	3.60699	3.18538	3.34132	2.13852	0.682194	0	0	0	0
199	CN1CCCC1=O	N-METHYL-2-PYRROLIDONE	130.782	0	0	0	0	0	0	0	0	0	0	0	0	0	0	0	0	0	0	0.001502	3.50412	15.426	24.8542	19.9866	15.3649	15.9275	10.5429	5.12871	3.2881	2.18452	0.951359	0.737481	0.935793	0.760641	0.622716	0.172537	2.08763	1.43577	2.24675	2.17569	5.92223	3.63713	1.55178	0.292914	0	0	0
200	CCC(=O)CC	3-PENTANONE	128.575	0	0	0	0	0	0	0	0	0	0	0	0	0	0	0	0	0	0	0.262848	8.79124	9.73189	12.7489	15.5798	17.6891	17.8362	10.8758	9.61751	13.2399	2.53402	1.93189	0.609029	0.784876	0.919196	2.0281	2.06504	0.569541	3.98735	4.07542	2.45372	1.50716	0	0	0	0	0	0
201	CCCC(=O)CC	3-HEXANONE	150.322	0	0	0	0	0	0	0	0	0	0	0	0	0	0	0	0	0	0	0.2275	7.46119	9.8759	12.1389	19.9526	21.8022	20.8541	13.4059	12.6506	16.5554	3.59381	2.10274	0.640506	0.754989	1.31724	1.38755	1.92443	0.975413	4.14402	3.80933	2.85835	1.21185	0	0	0	0	0	0
202	CCCC(=O)CCC	4-HEPTANONE	171.881	0	0	0	0	0	0	0	0	0	0	0	0	0	0	0	0	0	0	0.050459	6.56698	9.617	11.2458	24.2194	26.1475	24.2114	15.9335	15.263	20.5957	4.39325	2.02047	0.79545	0.79102	1.00292	1.6759	2.32751	0.504717	3.71015	4.35898	2.46211	1.41993	0.029386	0	0	0	0	0
203	CCCCOC=O	N-BUTYL_FORMATE	141.217	0	0	0	0	0	0	0	0	0	0	0	0	0	0	0	0.029521	2.66597	2.69515	1.69523	4.10279	6.24116	12.7856	21.9198	21.1033	14.5661	13.3491	10.6814	9.36847	4.0845	2.17954	1.91809	3.34714	2.25415	3.17646	2.73183	4.53925	4.95063	2.5556	0.633499	0	0	0	0	0	0	0
204	COC=O	METHYL_FORMATE	76.2423	0	0	0	0	0	0	0	0	0	0	0	0	0	0	0	0.28955	3.09218	2.96545	5.50249	7.77552	6.80475	6.79413	9.98949	7.85191	3.38725	4.43858	3.00451	1.2569	2.66903	1.83335	2.22947	3.23156	2.13639	3.94371	1.98075	5.1832	4.5397	2.04858	0.514843	0	0	0	0	0	0	0
205	CNC(C)=O	N-METHYLACETAMIDE	100.895	0	0	0	0	0	0	0	0	0	0.059195	0.663282	1.8384	0.468956	1.17189	1.39643	0.854954	0.604782	1.01375	2.33434	6.02847	10.4123	13.019	8.34973	8.64501	12.5502	10.4345	4.51227	3.76621	4.19186	2.79269	0.910703	0.78045	0.902325	0.462112	0.16342	1.98703	1.7149	2.20122	2.19381	6.37209	2.66335	1.36267	0.13459	0	0	0
206	O=C(O)CCl	CHLOROACETIC_ACID	97.1553	0	0	0	0	0	0.066077	1.04486	0.743716	0.738862	1.49225	1.25529	0.331338	0.100038	0.371622	3.13321	5.86604	3.53814	3.04719	4.5028	3.23245	1.83688	3.11641	4.77413	5.03018	3.50834	3.32439	5.33608	4.70534	3.77438	10.4281	6.38517	6.99547	6.82182	2.6493	4.11805	5.21968	3.10423	1.25546	0.057731	0	0	0	0	0	0	0
207	CCCCCCO	1-HEXANOL	157.51	0	0	0	0	0	0	0	0	0	0.289534	0.717034	1.515	0.069267	0.802017	1.02878	1.22199	0.642664	0.609748	0.74104	1.18329	2.21198	6.12427	18.5609	26.7297	27.175	20.2369	15.9411	15.1439	8.7207	1.77787	1.03991	1.2302	0.971916	1.04709	1.14304	0.875549	1.14228	1.94551	1.71999	2.39818	1.96412	0.840064	0	0	0	0
208	Fc1c(F)c(F)c(F)c(F)c1F	HEXAFLUOROBENZENE	159.996	0	0	0	0	0	0	0	0	0	0	0	0	0	0	0	0	0	0	0	0	11.3473	25.3474	7.47461	4.39807	5.69483	9.17513	25.096	51.8336	22.9717	0	0	0	0	0	0	0	0	0	0	0	0	0	0	0	0	0
209	C=CC(=O)O	ACRYLIC_ACID	90.8583	0	0	0	0	0	0	0.184641	1.3167	0.285164	1.16723	1.43718	0.929257	0.293351	0.198377	0.358085	1.06844	1.21845	3.83311	6.59163	4.69522	3.69925	4.02922	5.16111	6.60076	9.44806	6.08385	4.35465	5.33409	6.63934	6.33495	2.66388	1.67207	1.50964	5.075	3.92592	1.97893	6.72304	2.19283	0.210423	0	0	0	0	0	0	0
210	O=C=Nc1ccc(Cc2ccc(N=C=O)cc2)cc1	DIPHENYLMETHANE-4,4'-DIISOCYANATE	304.183	0	0	0	0	0	0	0	0	0	0	0	0	0	0	0	0	0.989111	4.19059	12.3607	18.2282	19.258	19.1901	16.7816	23.3541	18.7077	15.1061	16.3345	26.2398	20.9436	26.8243	21.4573	17.604	10.6092	0	0	0	0	0	0	0	0	0	0	0	0	0
211	NC1CCCCC1	CYCLOHEXYLAMINE	144.572	0	0	0	0	0	0	0	0	0	0	0	0	0	0	0.049273	0.972101	2.80516	1.35637	2.53231	2.894	2.49479	3.17892	15.4903	22.7952	26.1267	16.6937	16.3643	13.4025	5.5919	1.40863	1.15451	0.578795	0.976428	1.05909	0.31273	0.665995	0.896551	0.21882	0.138353	0.006437	2.21984	0.601019	0.509483	0.227323	0.705504	0.601767
212	CC[C@H](C)C(C)C	2,3-DIMETHYLPENTANE	167.02	0	0	0	0	0	0	0	0	0	0	0	0	0	0	0	0	0	0	0	0	0	1.67802	18.9302	22.2345	33.9509	20.4398	21.7444	25.4598	18.071	2.49617	0	0	0	0	0	0	0	0	0	0	0	0	0	0	0	0
213	CC(C)C(=O)O	ISOBUTYRIC_ACID	118.631	0	0	0	0	0	0	0	0.812697	0.953793	0.390729	1.38821	1.41728	0.505198	0.186816	0.296091	0.698829	1.02064	0.623966	0.420334	2.17085	5.81107	12.2527	14.3083	13.0199	12.4527	9.8141	12.4267	4.99164	2.61567	2.54086	3.59974	3.45309	0.93367	4.22053	3.19276	2.29184	6.58437	2.70463	0.64032	0	0	0	0	0	0	0
214	C[C@@H](O)CC(C)(C)O	HEXYLENE_GLYCOL	166.499	0	0	0	0	0	0	0	0	0	0.239464	0.965369	0.681847	0.656747	0.593898	1.34281	0.788896	0.985377	1.45791	1.19911	1.89986	4.43421	14.5156	20.3331	23.3947	13.6389	13.7921	21.9127	13.8814	3.14405	2.89111	1.36453	1.39921	1.86572	1.54989	1.48689	1.68583	3.57308	2.17917	1.91416	2.07046	2.34186	0.573434	0	0	0	0
215	COC(=O)c1ccccc1	METHYL_BENZOATE	168.557	0	0	0	0	0	0	0	0	0	0	0	0	0	0	0	0	0	0.605908	9.20315	16.672	13.9572	11.0929	12.1665	13.0717	11.2449	8.68609	10.9436	10.8052	12.0141	13.4391	11.3756	2.88919	1.5096	1.73185	3.0045	1.29747	5.59155	2.51042	0.220273	0	0	0	0	0	0	0
216	COC(=O)c1cccc(C(=O)OC)c1	DIMETHYL_ISOPHTHALATE	228.14	0	0	0	0	0	0	0	0	0	0	0	0	0	0	0	0	0.68078	7.03214	15.4991	17.4942	14.2089	16.3528	16.6235	16.7555	13.1818	14.9872	15.3812	15.1524	12.3491	3.43665	1.90287	3.48773	4.47427	4.98721	3.67656	6.52171	11.344	3.22852	1.95793	1.42288	0.218072	0	0	0	0	0
217	CCCC=O	BUTANAL	108.165	0	0	0	0	0	0	0	0	0	0	0	0	0	0	0	0	0	0	1.22822	6.91173	10.0744	16.0846	14.78	14.3281	9.69434	10.1603	8.25822	6.96396	1.58987	1.01028	1.25938	1.16557	1.54477	1.45512	2.60403	4.47077	3.89569	2.91354	1.99339	0.483811	0	0	0	0	0	0
218	C1=CCC=C1	CYCLOPENTADIENE	96.9589	0	0	0	0	0	0	0	0	0	0	0	0	0	0	0	0	0	0	1.52539	8.59933	12.018	9.68668	7.45319	8.52122	11.1748	6.55125	4.5936	7.70012	3.67643	5.59479	6.22645	3.30373	6.67117	5.71241	1.29789	0	0	0	0	0	0	0	0	0	0	0
219	C1CC[C@H]2CCCC[C@H]2C1	CIS-DECAHYDRONAPHTHALENE	200.932	0	0	0	0	0	0	0	0	0	0	0	0	0	0	0	0	0	0	0	0	0	0	7.37062	33.8793	39.0293	40.4649	24.034	23.518	17.5653	0.036997	0	0	0	0	0	0	0	0	0	0	0	0	0	0	0	0
220	CC(C)C	ISOBUTANE	103.408	0	0	0	0	0	0	0	0	0	0	0	0	0	0	0	0	0	0	0	0	0	1.07378	13.1692	17.6727	23.2358	14.0218	13.723	14.8142	16.3917	1.59293	0	0	0	0	0	0	0	0	0	0	0	0	0	0	0	0
221	C=CC(=O)OCCCC	N-BUTYL_ACRYLATE	177.695	0	0	0	0	0	0	0	0	0	0	0	0	0	0	0	0	0.047752	2.13351	5.17058	6.49374	7.754	13.1482	23.4482	24.1647	20.8772	17.5503	13.588	14.1399	6.91891	6.4821	3.85061	2.23352	2.98726	2.49332	3.57659	1.85817	4.15778	4.71183	0.405183	0	0	0	0	0	0	0
222	C=CC(=O)OCC	ETHYL_ACRYLATE	134.005	0	0	0	0	0	0	0	0	0	0	0	0	0	0	0	0	0.041266	2.11418	5.1903	8.04214	11.9538	13.5857	13.9532	13.2257	13.4544	13.4846	8.99247	6.00983	5.23042	6.64848	4.06574	2.20565	2.83316	2.62561	3.62265	1.80561	4.13374	4.72544	0.394956	0	0	0	0	0	0	0
223	C#CCCCCCC#C	1,8-NONADIYNE	191.326	0	0	0	0	0	0	0	0	0	0	0	0	0.096931	1.11999	2.9554	3.65178	2.10751	0.707394	3.0524	8.35163	10.8726	16.8259	22.8805	25.1449	12.9015	7.07415	9.17911	10.6604	6.91793	4.7459	5.20004	12.9152	10.1034	16.8862	5.74784	0	0	0	0	0	0	0	0	0	0	0
224	CCN	ETHYLAMINE	75.2703	0	0	0	0	0	0	0	0	0	0	0	0	0	0	0.08301	1.48704	3.03228	1.36121	3.02025	2.71971	2.53381	6.38806	13.0374	11.5855	8.50295	7.87624	6.32418	8.65152	2.85112	0.880473	1.46435	0.367198	1.00008	0.748361	0.611126	1.10304	0.665889	0.292898	0.094545	0.630933	1.40853	0.244707	0.867141	0.456812	1.19619	0.379281
225	CCCl	ETHYL_CHLORIDE	81.8662	0	0	0	0	0	0	0	0	0	0	0	0	0	0	0	0	0	0.340539	3.75807	5.62417	7.57347	10.0065	9.8575	7.49819	5.76776	9.00533	3.23373	4.09977	5.41716	1.3868	3.22839	10.7819	7.54314	2.87673	0	0	0	0	0	0	0	0	0	0	0	0
226	CCCCOCCOC(C)=O	ETHYLENE_GLYCOL_MONOBUTYL_ETHER_ACETATE	216.77	0	0	0	0	0	0	0	0	0	0	0	0	0	0	0	0	0	0.622417	4.18857	7.92629	12.6766	20.0898	28.165	34.3669	29.8121	16.587	12.8646	13.9728	5.93196	3.3884	2.44146	4.15689	2.92017	3.41487	5.1695	3.44721	6.82632	4.79967	2.60456	0.093725	0	0	0	0	0	0
227	CCCCC(=O)O	N-PENTANOIC_ACID	140.146	0	0	0	0	0	0	0	0.400307	1.30813	0.118111	1.43675	1.27335	0.854945	0.238183	0.279285	0.359642	1.21831	0.76064	1.23875	5.07782	4.05579	6.07349	17.2503	20.8727	18.6161	12.2731	11.7212	10.2713	5.24984	2.5149	3.5557	2.49951	1.05717	5.23875	2.93848	4.50302	5.50409	2.26871	0.233822	0	0	0	0	0	0	0
228	CNc1ccccc1	N-METHYLANILINE	146.289	0	0	0	0	0	0	0	0	0	0	0	0.450258	1.73494	0.602426	1.13036	1.05696	1.32686	1.59781	3.77136	6.36977	13.0099	14.9019	12.2854	11.5965	11.3546	6.48635	6.71183	7.5413	4.84733	7.12176	7.16681	10.6136	10.1722	6.54116	5.29803	0.500726	0	0	0	0	0	0	0	0	0	0
229	CCC#N	PROPIONITRILE	85.129	0	0	0	0	0	0	0	0	0	0	0	0	0	0	0	0	2.43774	5.73623	4.63956	5.5473	12.3769	11.898	5.28546	6.29838	6.46119	6.1464	1.75881	3.96574	2.06661	0.571353	1.92014	0.939466	2.41453	2.43923	4.87309	5.77517	4.45897	3.31947	1.25611	0	0	0	0	0	0	0
230	C=CC(=C)Cl	CHLOROPRENE	113.883	0	0	0	0	0	0	0	0	0	0	0	0	0	0	0	0	0.850873	4.54508	7.31881	7.6828	5.48282	6.0308	6.81615	6.79146	5.68676	9.0775	8.21384	8.88118	12.3362	17.5541	14.3046	4.23731	0.173929	0	0	0	0	0	0	0	0	0	0	0	0	0
231	C=CCCCCCCC	1-NONENE	207.444	0	0	0	0	0	0	0	0	0	0	0	0	0	0	0	0	0	0	0	0.699994	4.28322	7.67676	21.6091	34.3894	36.339	29.0722	25.4448	19.7118	16.0669	4.28372	2.6042	2.84312	3.19622	2.19859	2.15494	0.114816	0	0	0	0	0	0	0	0	0	0
232	CC(C)Cl	ISOPROPYL_CHLORIDE	103.726	0	0	0	0	0	0	0	0	0	0	0	0	0	0	0	0	0	0	1.33541	3.38921	10.8539	12.9431	12.6599	9.91092	8.5079	14.2989	7.03092	2.55157	5.19177	3.1678	2.03671	8.00793	8.29557	5.44738	0	0	0	0	0	0	0	0	0	0	0	0
233	C=CCCl	3-CHLOROPROPENE	98.2835	0	0	0	0	0	0	0	0	0	0	0	0	0	0	0	0	0.723316	3.60535	6.04326	7.1688	10.1021	6.92758	5.52567	4.97282	6.56999	5.41201	9.14085	8.01598	4.46912	5.54111	11.932	9.07359	7.52979	0.470474	0	0	0	0	0	0	0	0	0	0	0	0
234	c1ccoc1	FURAN	87.678	0	0	0	0	0	0	0	0	0	0	0	0	0	0	0	0.525158	2.99423	6.69466	6.4004	5.96856	3.77184	5.51416	5.34395	3.75616	4.77285	5.70362	4.30564	5.60934	6.08482	6.33321	9.88556	7.73021	6.97843	3.42806	0.244959	0	0	0	0	0	0	0	0	0	0	0
235	CCCCl	N-PROPYL_CHLORIDE	103.989	0	0	0	0	0	0	0	0	0	0	0	0	0	0	0	0	0	0.198356	2.80514	3.99124	4.97762	13.4434	13.6762	13.1361	9.41723	10.4003	7.69018	7.19108	4.98813	2.11522	2.74797	11.0281	7.5206	2.6682	0	0	0	0	0	0	0	0	0	0	0	0
236	C[C@H](O)c1ccccc1	ALPHA-METHYLBENZYL_ALCOHOL	165.589	0	0	0	0	0	0	0	0	0	0.370474	0.962736	1.14036	0.038775	0.801116	1.04953	1.0656	0.506382	0.524049	2.1017	9.5389	15.154	15.2736	15.5338	10.176	10.4645	8.18863	14.4053	9.45651	8.30737	6.02623	10.4124	9.2331	5.84655	0.975508	0.982299	1.8384	1.42726	0.648496	2.40123	1.90007	0.830751	0.08973	0	0	0	0
237	CCCCNCCCC	DI-N-BUTYLAMINE	205.661	0	0	0	0	0	0	0	0	0	0	0	0	0	0	0	0.362401	1.17424	0.825371	1.48254	0.886215	1.09218	4.55173	23.2216	34.115	42.1773	29.1822	25.4154	25.3796	10.7527	2.73754	1.60489	0.288144	0.382992	0.691102	0.542945	0.452969	0.305105	0.566929	0.347352	0.648438	1.34724	0.643167	0.419827	0.362177	0.280872	0.387639
238	CCCOCC	ETHYL_PROPYL_ETHER	135.345	0	0	0	0	0	0	0	0	0	0	0	0	0	0	0	0	0	0	0	0	1.20261	10.0184	25.7994	27.5524	19.9865	17.54	16.0326	14.3597	3.76756	1.02092	0.457452	1.27664	1.29218	0.304923	0.588406	1.27827	2.59047	1.94107	0.882157	1.94405	0.363166	0	0	0	0	0
239	CCCOCCC	DI-N-PROPYL_ETHER	157.046	0	0	0	0	0	0	0	0	0	0	0	0	0	0	0	0	0	0	0	0	0.087365	8.85062	27.84	33.85	23.7728	21.0893	17.5563	18.713	4.47898	1.19087	0.428844	1.47251	0.999815	0.291587	0.587492	1.16687	2.5847	2.06779	0.739255	1.70019	0.645251	0	0	0	0	0
240	CCCCOCC	N-BUTYL_ETHYL_ETHER	157.206	0	0	0	0	0	0	0	0	0	0	0	0	0	0	0	0	0	0	0	0	1.16973	8.06101	28.5468	31.6945	25.8803	20.438	17.5279	16.5854	6.2392	1.01158	0.505809	1.26383	1.33163	0.283173	0.588247	1.17473	2.4579	2.11123	0.819726	1.80745	0.576228	0	0	0	0	0
241	CCCCCCCO	1-HEPTANOL	179.608	0	0	0	0	0	0	0	0	0	0.219047	0.62447	1.71756	0.226049	0.613603	1.04456	1.16543	0.746249	0.626223	0.770429	0.996555	2.22026	5.98886	18.9031	30.6459	32.3043	24.7464	19.2596	16.0991	10.7626	1.78336	1.60734	1.10273	0.713503	0.898907	1.04154	1.20154	1.21402	1.53766	2.33755	2.21054	1.84173	0.848941	0	0	0	0
242	CCCCCCCCO	1-OCTANOL	201.335	0	0	0	0	0	0	0	0	0	0.296601	0.720465	1.50431	0.06946	0.79806	1.02312	1.20291	0.663748	0.623874	0.761408	1.12526	2.25948	6.11638	19.5666	33.6985	37.034	28.3091	22.7354	17.7734	13.0564	1.92282	1.05448	1.23311	0.991292	1.02506	1.15659	0.847294	1.14962	1.96005	1.69863	2.40933	1.97283	0.845607	0	0	0	0
243	CCCCCCCCCCO	1-DECANOL	244.959	0	0	0	0	0	0	0	0	0	0.281432	0.700094	1.53581	0.073506	0.801684	1.02232	1.21346	0.652267	0.612536	0.737589	1.1929	2.18542	6.09567	20.7511	40.336	47.3599	35.9726	29.7368	20.6713	16.9496	2.22607	1.04874	1.22289	0.951795	1.07251	1.14243	0.877291	1.17954	1.89455	1.74857	2.45854	1.97888	0.781744	0	0	0	0
244	CCCCCCCCCCCC(=O)O	N-DODECANOIC_ACID	290.982	0	0	0	0	0	0	0	0.404826	1.30882	0.124435	1.42178	1.28352	0.846652	0.239439	0.278065	0.358269	1.22036	0.760951	1.22735	5.02935	3.93646	5.7035	18.7256	44.8417	56.1412	42.7303	32.7841	22.5435	18.054	2.55232	3.54274	2.53254	1.03615	5.23505	2.97616	4.49502	5.52651	2.27351	0.222594	0	0	0	0	0	0	0
245	CCCCCCCCCCCCCC(=O)O	N-TETRADECANOIC_ACID	337.506	0	0	0	0	0	0.226785	0.822868	1.12902	0.313565	0.864342	1.49459	1.10645	0.410779	0.300059	0.393947	1.85867	1.28798	2.72491	4.26308	3.3602	4.39289	5.06101	22.7911	49.2869	61.2244	46.042	39.1604	23.8746	23.0251	2.51541	1.90511	2.65728	1.84669	2.92438	3.57131	7.30778	6.4183	2.92212	2.20592	0.591606	0	0	0	0	0	0
246	CCCCCCCCCCCC(=O)OC	METHYL_DODECANOATE	315.721	0	0	0	0	0	0	0	0	0	0	0	0	0	0	0	0	0	0.110536	2.43132	8.83973	8.84741	10.2492	26.0814	51.9887	55.9663	41.0581	34.8508	22.2192	20.4719	3.37214	2.17168	2.28262	3.54962	1.8293	3.40866	2.54625	4.07933	4.28008	1.31601	0.043076	0	0	0	0	0	0
247	OC[C@@H]1CO1	2,3-EPOXY-1-PROPANOL	95.4326	0	0	0	0	0	0	0	0	0.234641	0.943909	1.47417	0.594759	0.763998	0.730434	1.63084	1.1548	0.665604	0.986276	5.89597	12.4858	9.88255	6.86211	6.51298	6.45728	5.83347	3.97741	3.4288	3.11698	2.23327	3.4091	2.42457	2.33848	1.87626	2.91009	3.21855	4.13952	4.53771	4.48719	2.82629	2.28367	0.344325	0	0	0	0	0
248	CC(C)c1ccccc1	CUMENE	173.995	0	0	0	0	0	0	0	0	0	0	0	0	0	0	0	0	0	0	0.815352	7.39081	11.8757	15.7377	17.8807	17.5211	15.3064	14.4205	14.1348	13.7825	10.0349	7.18064	6.68991	9.09189	8.71392	2.85974	0.003299	0	0	0	0	0	0	0	0	0	0	0
249	C=CCCCCCCCC	1-DECENE	229.25	0	0	0	0	0	0	0	0	0	0	0	0	0	0	0	0	0	0	0	0.694017	4.22487	7.85898	22.2951	37.3116	41.4942	33.1999	28.9151	20.8555	18.2615	4.20439	2.27748	3.52245	3.3734	1.5968	2.40843	0.114196	0	0	0	0	0	0	0	0	0	0
250	C=CC(C)C	3-METHYL-1-BUTENE	119.008	0	0	0	0	0	0	0	0	0	0	0	0	0	0	0	0	0	0	0	0.49256	3.69628	10.5794	18.6002	18.2527	14.1908	12.7529	11.394	14.6533	7.52763	4.10945	1.9407	2.85766	3.13693	2.12996	2.03367	0.332173	0	0	0	0	0	0	0	0	0	0
251	C=C/C=C/C	TRANS-1,3-PENTADIENE	113.275	0	0	0	0	0	0	0	0	0	0	0	0	0	0	0	0	0	0	0.04698	3.91606	13.1496	15.7084	13.2899	9.4055	9.73655	10.1865	10.8023	7.38787	6.48959	6.46757	4.63156	8.09371	5.89667	3.39018	0.812882	0	0	0	0	0	0	0	0	0	0	0
252	CCC=C(C)C	2-METHYL-2-PENTENE	139.904	0	0	0	0	0	0	0	0	0	0	0	0	0	0	0	0	0	0	0	0.116631	2.15708	11.3793	18.6553	23.1973	16.6784	15.376	19.674	19.3054	7.64024	4.20481	3.33948	2.54692	2.92312	1.59189	1.00302	0	0	0	0	0	0	0	0	0	0	0
253	CCC(=O)C(C)C	ETHYL_ISOPROPYL_KETONE	151.247	0	0	0	0	0	0	0	0	0	0	0	0	0	0	0	0	0	0	0.451063	3.6529	9.10689	17.8114	20.1851	21.8214	16.3165	13.2793	15.683	14.2209	3.15755	1.50985	0.96551	0.734666	1.22944	1.30386	2.21941	1.03463	3.53871	4.48865	2.82487	0.827137	0	0	0	0	0	0
254	CCCC[C@@H](C)CO	2-METHYL-1-HEXANOL	179.332	0	0	0	0	0	0	0	0	0	0.217725	0.643557	1.94552	0.392504	0.459461	0.925104	1.08385	1.02006	0.467702	0.877362	0.801154	0.473587	2.98797	17.9765	30.5614	30.922	23.7455	19.9735	20.2292	10.5224	2.28859	0.960736	1.0982	0.83575	0.617581	0.913326	0.711603	2.68182	1.92368	1.82413	1.39366	1.01294	0.157155	0	0	0	0
255	C=CC=C	1,3-BUTADIENE	91.7371	0	0	0	0	0	0	0	0	0	0	0	0	0	0	0	0	0	0	0.014081	4.63193	11.2959	13.2707	7.3185	6.9871	7.34973	7.01896	9.09278	9.29696	5.91146	8.86739	8.6817	7.03272	1.86605	0	0	0	0	0	0	0	0	0	0	0	0	0
256	C#CC=C	VINYLACETYLENE	86.7539	0	0	0	0	0	0	0	0	0	0	0	0	0.546356	1.40452	1.96654	1.04838	0.527447	3.25189	5.9564	6.65575	4.25377	4.33857	6.29181	3.8835	4.64494	4.92694	7.78513	4.66103	6.17938	8.55793	11.5528	7.63505	8.72077	0.28701	0	0	0	0	0	0	0	0	0	0	0	0
257	CC(C)C(C)C	2,3-DIMETHYLBUTANE	145.975	0	0	0	0	0	0	0	0	0	0	0	0	0	0	0	0	0	0	0	0	0	1.62522	16.5894	22.7978	27.8791	18.6936	18.1629	20.3756	18.3761	2.84705	0	0	0	0	0	0	0	0	0	0	0	0	0	0	0	0
258	C=CCC	1-BUTENE	97.4552	0	0	0	0	0	0	0	0	0	0	0	0	0	0	0	0	0	0	0	0.747702	4.54169	10.969	15.1985	14.8291	10.5789	12.0402	11.3946	10.4377	5.64356	3.75101	2.41214	3.25912	3.53607	1.69182	2.15518	0.079175	0	0	0	0	0	0	0	0	0	0
259	CCCc1ccccc1	N-PROPYLBENZENE	174.979	0	0	0	0	0	0	0	0	0	0	0	0	0	0	0	0	0	0	0.371551	6.53403	9.88808	15.923	20.8691	20.3217	17.5497	14.058	15.6122	12.3839	10.7157	6.01255	7.43842	9.09424	7.94971	3.47029	0.046794	0	0	0	0	0	0	0	0	0	0	0
260	CCC(C)(C)C	2,2-DIMETHYLBUTANE	146.22	0	0	0	0	0	0	0	0	0	0	0	0	0	0	0	0	0	0	0	0	0	1.70737	17.3614	24.0784	28.1744	14.6885	16.8002	19.8081	20.6949	2.95716	0	0	0	0	0	0	0	0	0	0	0	0	0	0	0	0
261	CCCC(=O)OCC	ETHYL_N-BUTYRATE	160.608	0	0	0	0	0	0	0	0	0	0	0	0	0	0	0	0	0	0	0.585924	4.45784	11.9654	17.879	24.0041	21.8952	18.9408	16.1664	14.1912	10.4876	3.47369	2.3226	2.64189	1.98112	3.52884	1.65277	3.38562	2.68406	3.51425	4.99402	1.44592	0.127943	0	0	0	0	0	0
262	CC(=O)c1ccccc1	ACETOPHENONE	157.134	0	0	0	0	0	0	0	0	0	0	0	0	0	0	0	0	0	1.48755	11.4255	14.4419	13.7383	11.6063	9.24996	9.313	11.8009	9.51098	10.026	7.64938	11.4934	11.5821	9.05045	1.322	0.872028	1.79446	2.57068	2.64667	4.12073	3.78269	1.1969	1.00224	0	0	0	0	0	0
263	CC(=O)OCC(C)C	ISOBUTYL_ACETATE	162.832	0	0	0	0	0	0	0	0	0	0	0	0	0	0	0	0	0	0.211884	3.09618	5.17685	9.96564	16.2351	21.1379	22.4085	20.4857	14.4532	11.5603	14.2702	4.62662	2.11675	2.47544	1.47526	2.91729	1.88866	2.5891	2.12267	4.32784	4.31124	1.99656	0.38176	0	0	0	0	0	0
264	O=C1C=CC(=O)O1	MALEIC_ANHYDRIDE	103.217	0	0	0	0	0	0	0	0	0	0	0	0	0	0.309049	4.4015	5.30917	2.42892	3.79692	6.83933	7.56277	7.71448	7.14851	6.29693	5.99196	1.46091	2.94288	1.51842	2.9815	2.7646	5.63271	5.85595	6.86218	8.73978	10.6567	7.16145	2.86562	0.121194	0	0	0	0	0	0	0	0	0
265	CN=C=O	METHYL_ISOCYANATE	74.952	0	0	0	0	0	0	0	0	0	0	0	0	0	0	0	0	0	0	3.92259	7.83836	7.60651	8.0062	9.34938	6.95411	7.90272	6.93646	2.55068	3.83843	2.06581	3.94016	2.55245	6.00231	7.288	7.53965	0.083953	0	0	0	0	0	0	0	0	0	0	0
266	CC(C)N	ISOPROPYLAMINE	97.1161	0	0	0	0	0	0	0	0	0	0	0	0	0	0	0.100271	1.24096	2.99866	1.49714	2.64172	2.60134	3.56599	7.25006	9.49779	15.4135	14.0207	10.3503	7.83624	13.3859	5.27102	1.90633	1.03092	0.754938	0.838643	0.668995	0.158416	1.37508	0.587688	0.11454	0.090518	0.576444	1.84033	0.565285	0.180168	0.259855	0.763552	0.493127
267	CCCN	N-PROPYLAMINE	96.5877	0	0	0	0	0	0	0	0	0	0	0	0	0	0	0.163789	1.7844	3.11653	1.22746	2.91828	2.5146	2.18056	4.48583	11.4682	15.8459	16.4308	11.598	10.9046	11.1827	3.53446	1.9519	0.998642	0.283889	0.950125	0.675682	0.503523	0.980185	0.610217	0.343167	0.142929	0.499111	1.72184	0.379348	0.548937	0.202689	0.980571	0.246648
268	CCC[C@H](CC)CCO	2-ETHYL-1-HEXANOL	201.82	0	0	0	0	0	0	0	0	0	0.327686	1.0279	1.63324	0.210487	0.649044	0.973637	1.01813	1.04029	0.37451	1.00948	0.668332	0.68901	6.39473	21.3177	31.9462	34.2275	23.6447	20.4425	20.3095	12.0595	2.36625	0.601824	1.03161	1.50071	0.264594	1.00933	0.398906	2.27768	1.75949	1.22663	2.01787	2.36281	1.00627	0	0	0	0
269	CC(=O)OC(C)C	ISOPROPYL_ACETATE	140.705	0	0	0	0	0	0	0	0	0	0	0	0	0	0	0	0	0	0.28607	2.78231	4.87685	11.8219	16.4044	18.9355	15.3944	18.3784	13.232	13.9084	5.34793	1.70581	1.96034	1.597	2.53055	3.42152	2.01612	3.70753	2.56676	3.14272	4.49489	1.91833	0.428726	0	0	0	0	0	0
270	C1CCCCCC1	CYCLOHEPTANE	149.983	0	0	0	0	0	0	0	0	0	0	0	0	0	0	0	0	0	0	0	0	0	0	3.75771	26.9524	31.5894	32.2295	23.8936	21.5225	8.98646	0	0	0	0	0	0	0	0	0	0	0	0	0	0	0	0	0
271	C1CCCCCCC1	CYCLOOCTANE	171.387	0	0	0	0	0	0	0	0	0	0	0	0	0	0	0	0	0	0	0	0	0	0	5.20782	31.5794	38.7499	28.5038	20.6241	26.7136	12.759	0	0	0	0	0	0	0	0	0	0	0	0	0	0	0	0	0
272	Clc1ccc(Cl)c(Cl)c1Cl	1,2,3,4-TETRACHLOROBENZENE	196.906	0	0	0	0	0	0	0	0	0	0	0	0	0	0	0	0.985418	5.17011	3.49964	2.77939	4.22293	6.73933	8.07247	2.51573	8.79792	30.3595	18.4465	16.9822	32.0598	29.3215	19.7225	0.654343	0	0	0	0	0	0	0	0	0	0	0	0	0	0	0
273	C[C@H](N)CN	1,2-PROPANEDIAMINE	113.384	0	0	0	0	0	0	0	0	0	0	0	0	0	0	0.321569	2.28985	4.4901	1.89192	4.94447	5.08287	5.19832	13.493	15.9849	12.273	8.30972	8.19326	7.50882	9.21631	2.94099	1.84121	0.541665	1.02804	2.87788	1.5085	0.929564	1.42918	1.32649	0.839755	0.634136	1.48315	2.52996	0.502694	0.79068	1.30223	1.27566	0.674967
274	Cc1cc(C)c(C)cc1C	1,2,4,5-TETRAMETHYLBENZENE	196.385	0	0	0	0	0	0	0	0	0	0	0	0	0	0	0	0	0	0	0	0.286944	10.1551	21.7942	26.1378	18.9244	16.895	15.916	27.1706	16.6478	8.13076	5.82962	5.20556	7.04138	6.85111	3.9406	1.53601	0.012664	0	0	0	0	0	0	0	0	0	0
275	CCCCCCCCCCCCC	N-TRIDECANE	299.236	0	0	0	0	0	0	0	0	0	0	0	0	0	0	0	0	0	0	0	0	0	0.894415	16.4582	48.6422	67.4141	51.9789	48.4756	30.4259	30.1839	2.39981	0	0	0	0	0	0	0	0	0	0	0	0	0	0	0	0
276	Cc1ccc(C(C)C)cc1	P-CYMENE	198.578	0	0	0	0	0	0	0	0	0	0	0	0	0	0	0	0	0	0	0.064526	3.86223	10.4947	20.0657	21.9924	22.1369	17.2822	17.598	19.2308	18.9738	10.4554	6.87527	5.64412	9.6603	6.27375	4.00055	0.232372	0	0	0	0	0	0	0	0	0	0	0
277	ClCC(Cl)CCl	1,2,3-TRICHLOROPROPANE	147.667	0	0	0	0	0	0	0	0	0	0	0	0	0	0	0	2.20561	10.6779	11.5749	5.13994	8.40973	4.42201	3.06536	2.49296	9.30676	1.8533	5.1483	15.1133	8.16378	2.40225	18.3658	22.6255	16.694	4.92137	0.18399	0	0	0	0	0	0	0	0	0	0	0	0
278	CN(C)CCO	DIMETHYLETHANOLAMINE	130.306	0	0	0	0	0	0	0	0	0	0.3901	1.06333	1.33369	0.1486	0.791297	1.08628	1.11647	0.750804	0.761268	0.532743	1.4373	10.3813	12.3499	14.8092	14.4498	16.819	16.0648	14.4841	3.78114	1.93549	1.77945	2.0751	2.31294	1.81502	1.0819	1.38104	1.69152	1.25548	3.1832	3.35404	2.27269	1.80612	1.198	0.191284	0.102985	0	0
279	C=C(C)C(=O)OCCCC	N-BUTYL_METHACRYLATE	200.027	0	0	0	0	0	0	0	0	0	0	0	0	0	0	0	0	0	0.231609	1.85526	4.78251	11.1428	16.4354	24.9867	26.2281	22.985	23.8907	19.4917	13.9361	8.56462	6.81158	5.31219	1.21872	1.43631	1.00081	2.88763	2.12932	3.17475	5.61798	0.650528	0	0	0	0	0	0	0
280	CC(C)c1ccc(C(C)C)cc1	P-DIISOPROPYLBENZENE	237.225	0	0	0	0	0	0	0	0	0	0	0	0	0	0	0	0	0	0	0.198123	4.4883	9.89535	17.4483	27.9164	26.4084	24.7716	23.7848	20.019	25.6268	10.2567	7.98157	5.79392	8.08542	6.91882	4.83941	0.569943	0	0	0	0	0	0	0	0	0	0	0
281	CCCCCCCCC	N-NONANE	211.7	0	0	0	0	0	0	0	0	0	0	0	0	0	0	0	0	0	0	0	0	0	0.924337	14.0035	34.8128	48.4647	35.6742	34.3098	24.1072	23.4426	1.19073	0	0	0	0	0	0	0	0	0	0	0	0	0	0	0	0
282	CCC=O	PROPANAL	85.8236	0	0	0	0	0	0	0	0	0	0	0	0	0	0	0	0	0	0	1.3459	7.96496	12.8676	13.4611	11.5307	8.06808	8.01929	5.45998	8.15004	2.07652	0.717435	0.894873	1.12525	1.03975	2.23028	1.50254	2.12913	4.81309	3.82549	2.78173	2.01299	0.44256	0	0	0	0	0	0
283	CCC(=O)OC	METHYL_PROPIONATE	118.163	0	0	0	0	0	0	0	0	0	0	0	0	0	0	0	0	0	0.116561	2.82142	9.95034	9.4428	13.6778	15.1026	17.4511	12.4158	7.74844	8.93853	4.40498	1.8115	2.94171	2.47472	1.9045	4.05676	1.67021	1.98733	1.9048	3.83005	4.80092	2.10275	0.639219	0.014408	0	0	0	0	0
284	CCC1CCCCC1	ETHYLCYCLOHEXANE	171.741	0	0	0	0	0	0	0	0	0	0	0	0	0	0	0	0	0	0	0	0	0	0.495904	10.2681	27.3953	36.5939	29.1498	26.2957	24.3952	13.7696	0.591778	0	0	0	0	0	0	0	0	0	0	0	0	0	0	0	0
285	CC(=O)Br	ACETYLBROMIDE	93.9265	0	0	0	0	0	0	0	0	0	0	0	0	0	0	0	0.811284	3.01686	5.48857	5.81015	5.48912	5.75021	8.10481	7.92677	3.67769	2.24993	5.39079	4.30439	3.55534	8.13134	11.1789	10.7908	8.16599	5.44539	2.68196	0.446662	0	0	0	0	0	0	0	0	0	0	0
286	CC(=O)I	ACETYLIODIDE	104.735	0	0	0	0	0	0	0	0	0	0	0	0	0	0	0	1.04491	3.09101	5.83478	5.72312	5.06126	6.26453	9.74139	7.9347	1.89587	4.83855	5.59345	3.40258	6.01758	9.40539	12.5414	14.5042	7.39673	5.15665	1.36778	0.015564	0	0	0	0	0	0	0	0	0	0	0
287	CCCCOCCOCCO	2-(2-BUTOXYETHOXY)ETHANOL	222.985	0	0	0	0	0	0	0	0	0.132116	0.507831	1.61701	0.391831	1.00059	0.68381	1.5237	0.410598	0.757068	1.15717	1.27445	2.11085	9.2694	24.2725	33.3836	29.5349	28.1308	21.1895	15.161	14.5217	6.81878	3.73983	2.41266	1.85166	1.54705	2.87112	5.07657	6.76214	3.52213	3.96151	4.77355	2.6127	0.7769	0	0	0	0	0
288	CCCCCCCCCC(=O)OC	METHYL_DECANOATE	271.771	0	0	0	0	0	0	0	0	0	0	0	0	0	0	0	0	0	0.111714	2.36011	8.76965	9.0992	10.2699	25.2435	44.471	46.1453	33.1542	27.6032	19.3071	16.1438	3.19384	2.04196	2.41961	3.14112	2.15646	3.685	2.05723	4.76147	4.10543	1.14932	0.048813	0	0	0	0	0	0
289	CC(C)(C)Br	2-BROMO-2-METHYLPROPANE	132.147	0	0	0	0	0	0	0	0	0	0	0	0	0	0	0	0	0	0	0	1.72349	13.2184	15.8953	15.1001	11.4738	12.4297	18.2979	9.20447	4.67863	4.44227	1.03403	4.52098	9.69485	5.95801	7.49493	0	0	0	0	0	0	0	0	0	0	0	0
290	SC1CCCC1	CYCLOPENTANETHIOL	139.234	0	0	0	0	0	0	0	0	0	0	0	0	0	0	0	0.04137	0.739854	1.84691	0.58023	2.16549	3.09571	9.14647	20.8294	21.9653	18.6141	12.3264	13.7368	12.3202	3.71976	3.42402	3.63339	2.077	3.4241	2.23417	2.31724	2.08146	1.99829	1.16092	0	0	0	0	0	0	0	0
291	C[C@H](CO)O[C@H](C)CO	DIPROPYLENE_GLYCOL	181.585	0	0	0	0	0	0	0	0	0	0	0	0	0.055585	0.668394	0.772377	2.24825	0.867926	0.751627	3.15866	3.72967	14.3425	21.2136	22.1867	17.6543	15.7246	14.3956	14.9522	7.39351	3.3182	5.0063	1.62475	1.5382	2.17577	1.9079	1.40964	3.43743	2.71613	2.9898	5.64455	3.79151	1.22609	0	0	0	0	0
292	c1ccc(-c2cccc3ccccc23)cc1	1-PHENYLNAPHTHALENE	262.286	0	0	0	0	0	0	0	0	0	0	0	0	0	0	0	0	0	0	7.43632	23.3567	22.9032	18.6362	14.378	14.2632	11.2695	10.9465	12.2049	18.8475	17.3225	24.861	25.8764	18.3935	2.75043	0.030032	0	0	0	0	0	0	0	0	0	0	0	0
293	CCCCCOC(C)=O	N-PENTYL_ACETATE	183.757	0	0	0	0	0	0	0	0	0	0	0	0	0	0	0	0	0	0.379911	3.08864	5.43484	9.4974	12.7104	25.0975	30.7338	28.227	16.8837	13.9939	12.4553	5.66148	2.97435	1.56038	1.97245	3.55303	2.44557	3.03037	2.71813	4.12442	4.39423	2.19379	0.310007	0	0	0	0	0	0
294	CC(C)CC(=O)CC(C)C	DIISOBUTYL_KETONE	218.213	0	0	0	0	0	0	0	0	0	0	0	0	0	0	0	0	0	0	0.268997	5.51201	9.02079	11.4148	25.8853	30.2317	29.3815	22.5959	17.4499	25.5144	14.9654	2.27073	1.30611	1.12826	0.772719	0.897238	1.74536	1.89866	2.42557	4.01414	2.01574	0.25366	0	0	0	0	0	0
295	CCCOC=O	N-PROPYL_FORMATE	119.165	0	0	0	0	0	0	0	0	0	0	0	0	0	0	0	0.0362	2.69554	2.6773	1.7032	4.07469	6.83008	16.0385	16.1631	16.1559	10.4805	11.5385	9.25027	4.89368	2.9055	2.1946	1.84141	3.45899	2.14302	3.24972	2.68996	4.63061	4.82129	2.55627	0.622729	0	0	0	0	0	0	0
296	NCCCCCCN	HEXAMETHYLENEDIAMINE	178.005	0	0	0	0	0	0	0	0	0	0	0	0	0	0	0.320927	3.50937	6.28712	2.33389	5.91851	5.07269	4.30709	6.35593	15.2587	29.4419	30.4727	22.6608	14.7524	9.42931	4.49546	3.5082	2.21783	0.703108	1.83733	1.28238	0.988017	2.05457	1.08495	0.849864	0.28675	0.917767	3.38642	0.8736	1.06003	0.473415	1.93446	0.501138
297	CCCCOC(=O)CCC	N-BUTYL_N-BUTYRATE	204.665	0	0	0	0	0	0	0	0	0	0	0	0	0	0	0	0	0	0	0.457521	3.98636	6.96436	17.4655	32.8748	33.3873	26.0327	20.7071	18.3306	18.8324	4.86372	2.20226	2.41408	2.04275	3.1764	2.4774	3.3481	2.16133	4.33038	4.54964	1.50241	0.03164	0	0	0	0	0	0
298	N#CCCCCC#N	ADIPONITRILE	155.785	0	0	0	0	0	0	0	0	0	0	0	0	0	0	0	0.258688	8.55536	10.4853	10.301	22.1229	20.1161	7.70022	4.59422	8.85075	3.54685	2.28434	3.02384	6.99637	3.19759	0.917309	4.69341	1.50806	4.8381	6.04659	9.38356	11.9832	8.34095	6.01941	1.60603	0	0	0	0	0	0	0
299	O=C(O)c1ccccc1	BENZOIC_ACID	146.815	0	0	0	0	0	0	0	0.895784	0.870716	0.158021	1.83403	1.1657	0.570484	0.20101	0.323659	0.648956	1.0018	0.73805	4.81966	10.4052	10.3463	7.41021	7.09536	9.70149	9.7219	8.62881	13.5484	13.1471	15.0847	10.0942	3.86421	2.43297	2.60208	3.99042	1.75232	3.59454	5.99447	0.95196	0.001474	0	0	0	0	0	0	0
300	CSC1CCCC1	CYCLOPENTYL-1-THIAETHANE	160.871	0	0	0	0	0	0	0	0	0	0	0	0	0	0	0	0	0	0	1.17973	2.24091	5.75766	12.122	20.4761	22.5861	26.2231	17.1206	13.688	12.7579	3.61736	2.70524	3.40341	3.03772	3.69567	2.15754	1.48639	2.27889	2.54785	1.52226	0.55495	0	0	0	0	0	0	0
301	CC(=O)C(C)C	METHYL_ISOPROPYL_KETONE	129.818	0	0	0	0	0	0	0	0	0	0	0	0	0	0	0	0	0	0.063091	1.351	5.41386	10.9677	15.3525	17.3969	15.62	15.2325	11.7234	11.28	8.80268	1.82766	1.98419	0.976236	0.625228	0.782941	1.90227	1.87906	1.45776	4.39094	3.77128	2.32705	1.7413	0.226801	0	0	0	0	0
302	c1ccc2scnc2c1	BENZOTHIAZOLE	155.843	0	0	0	0	0	0	0	0	0	0	0	0	0	0	1.57794	2.53612	2.28984	3.95641	7.77463	9.52448	8.98742	8.19274	5.83019	9.6272	9.04603	9.40429	8.9755	19.1152	13.9324	12.5383	8.96007	3.7378	2.31094	2.01162	1.05028	1.47029	0.989598	1.07087	1.45974	0.79911	0.69504	0.100604	0	0	0	0
303	CCCOC(=O)CC	N-PROPYL_PROPIONATE	160.879	0	0	0	0	0	0	0	0	0	0	0	0	0	0	0	0	0	0	0.861135	4.59002	8.30399	20.6795	22.5522	24.9319	19.1038	15.3024	15.4173	9.53258	3.06392	2.1432	2.33584	2.08027	3.57076	2.09666	2.65707	3.03293	3.85308	4.58049	1.56	0.127933	0	0	0	0	0	0
304	c1ccc2ncccc2c1	QUINOLINE	162.625	0	0	0	0	0	0	0	0	0	0	0	0	0	0	0	0	0.020176	2.5027	13.3098	15.2782	12.9272	9.5737	6.61281	7.61626	6.95983	8.39312	8.7627	16.7639	17.5742	14.9715	9.72174	2.51595	0.900344	1.10249	1.70234	0.816906	1.61163	1.42443	0.696143	0.958242	0.418079	1.17426	0.418692	0.033833	0	0
305	C#CCO	PROPARGYL_ALCOHOL	81.3897	0	0	0	0	0	0	0	0	0.376906	0.907745	1.38352	0.177844	0.937253	2.7401	3.0422	1.64577	1.16639	3.93169	5.76557	5.79979	3.40551	4.86502	4.83922	2.0671	2.72077	2.98939	4.76641	3.73152	2.84938	5.59956	7.45522	4.81325	9.116	3.01792	0.926343	1.23261	1.94551	2.30758	2.07806	1.2009	0.123589	0	0	0	0	0
306	c1ccc(C2CCCCC2)cc1	CYCLOHEXYLBENZENE	220.877	0	0	0	0	0	0	0	0	0	0	0	0	0	0	0	0	0	0	0.799386	7.02516	10.9719	11.6234	19.1489	26.7489	29.7626	22.1228	21.3313	14.1109	10.3059	6.91838	6.82376	9.18744	8.12555	3.69549	0.069133	0	0	0	0	0	0	0	0	0	0	0
307	ClC[C@H]1CO1	ALPHA-EPICHLOROHYDRIN	107.084	0	0	0	0	0	0	0	0	0	0	0	0	0	0	0	0	1.39936	6.97042	11.154	9.0213	7.00473	6.72772	6.65626	5.72909	6.25311	2.98924	6.64417	6.12243	2.87176	3.14268	12.1594	8.50656	4.37575	2.43601	2.36902	2.93626	2.84706	1.0817	0.206659	0	0	0	0	0	0	0
308	FC(F)(F)Cl	CHLOROTRIFLUOROMETHANE	84.7588	0	0	0	0	0	0	0	0	0	0	0	0	0	0	0	0	0	0.477591	1.28431	1.75229	0	2.85683	5.06355	3.34843	7.25232	25.2902	41.5134	11.5936	0	0	0	0	0	0	0	0	0	0	0	0	0	0	0	0	0	0
309	COCCOCCO	2-(2-METHOXYETHOXY)ETHANOL	159.139	0	0	0	0	0	0	0	0	0.179722	0.578803	1.54204	0.359119	0.892207	0.79568	1.63478	0.400726	0.739723	0.517794	1.61609	3.46774	13.373	27.6035	20.9535	14.5482	17.5452	12.4629	5.87627	3.92359	3.69306	3.95694	2.73209	1.68803	2.06182	3.17079	5.85168	6.04287	2.39132	5.22811	4.76333	2.28502	0.6886	0	0	0	0	0
310	C/C=C/C	TRANS-2-BUTENE	96.2258	0	0	0	0	0	0	0	0	0	0	0	0	0	0	0	0	0	0	0	0	1.93933	14.2037	14.0042	15.3846	10.4518	11.5524	14.5252	10.0359	4.64275	3.94494	3.47639	2.99862	2.18772	2.68993	1.19107	0	0	0	0	0	0	0	0	0	0	0
311	COC(=O)OC	DIMETHYL_CARBONATE	108.412	0	0	0	0	0	0	0	0	0	0	0	0	0	0	0	0	0	1.12875	7.51776	12.9209	10.626	11.2318	16.5311	10.5349	6.05642	3.72532	3.08021	3.41595	3.74887	3.12067	2.96103	3.37772	2.22668	2.04317	4.48672	3.10995	6.88867	3.32557	1.66014	0.24343	0	0	0	0	0	0
312	CCCCC(=O)CCCC	5-NONANONE	215.619	0	0	0	0	0	0	0	0	0	0	0	0	0	0	0	0	0	0	0.062175	6.19835	10.1611	9.32575	26.7946	34.3839	35.939	21.9474	20.5806	22.0208	10.008	2.28349	0.943428	0.851742	0.901154	1.99387	2.18011	0.687438	3.49624	4.40803	2.42341	1.46138	0.038793	0	0	0	0	0
313	C=Cc1ccccc1Br	O-BROMOVINYLBENZENE	175.145	0	0	0	0	0	0	0	0	0	0	0	0	0	0	0	0	0.048307	3.94819	9.45759	12.2712	11.3574	10.9515	6.54739	8.089	10.1951	8.67329	10.6285	16.9239	21.6147	22.5382	17.0471	3.23084	1.75916	0.026879	0	0	0	0	0	0	0	0	0	0	0	0
314	CCOCCOCCO	2-(2-ETHOXYETHOXY)ETHANOL	179.829	0	0	0	0	0	0	0	0	0.159435	0.540323	1.57993	0.372409	0.894734	0.796652	1.62354	0.408269	0.73611	0.536511	1.61517	2.27826	10.9772	27.509	27.49	19.4235	18.5389	14.659	12.8868	6.75504	4.24949	3.40696	2.43965	1.84018	1.67812	2.99489	5.49986	6.6837	3.39065	4.31484	4.62222	2.38344	0.747783	0	0	0	0	0
315	C=C(C)C	ISOBUTENE	97.7595	0	0	0	0	0	0	0	0	0	0	0	0	0	0	0	0	0	0	0	0.126181	4.93595	14.0835	16.3298	11.3408	8.67026	9.18204	16.4557	7.8586	4.05726	4.7072	4.09617	2.51581	2.58518	2.48337	1.86497	0.614387	0	0	0	0	0	0	0	0	0	0
316	CC(C)C=O	2-METHYLPROPANAL	108.12	0	0	0	0	0	0	0	0	0	0	0	0	0	0	0	0	0	0	0.810542	7.07088	10.4881	13.5826	15.998	13.0442	8.96031	8.04007	12.5086	6.21555	1.83654	0.631058	0.945863	1.21411	1.59503	2.2077	1.32152	4.39464	4.11381	3.05979	1.50317	0.338884	0	0	0	0	0	0
317	C/C=C\C	CIS-2-BUTENE	95.6677	0	0	0	0	0	0	0	0	0	0	0	0	0	0	0	0	0	0	0	0.347819	4.03872	13.4381	13.1329	13.3845	10.8694	10.8268	15.4211	9.34957	4.83949	2.81859	3.27089	2.19485	3.14284	2.51933	1.73721	0.306593	0	0	0	0	0	0	0	0	0	0
318	CC(C)(C)N	TERT-BUTYLAMINE	119.865	0	0	0	0	0	0	0	0	0	0	0	0	0	0	0.018902	0.981579	2.70063	1.53468	2.60207	2.77466	3.23792	10.1564	16.0212	15.3397	12.3897	9.63508	8.61758	18.1459	9.04355	2.01884	1.04288	0.789037	0.658347	0.659732	0.533431	0.888309	0.750562	0.272053	0.050962	0.29212	1.79289	0.909073	0.205925	0.183015	0.643188	0.443558
319	CCC[C@@H](C)CC	3-METHYLHEXANE	167.578	0	0	0	0	0	0	0	0	0	0	0	0	0	0	0	0	0	0	0	0	0	1.88088	15.839	25.2542	34.6542	23.6592	24.7994	26.1863	16.9184	1.80807	0	0	0	0	0	0	0	0	0	0	0	0	0	0	0	0
320	C=CC(=O)OC	METHYL_ACRYLATE	112.812	0	0	0	0	0	0	0	0	0	0	0	0	0	0	0	0	0.036614	2.62168	7.68403	11.7316	8.46496	7.65109	10.6602	11.8648	10.4777	8.02201	5.51172	6.29834	5.23855	6.26441	3.29086	3.50966	2.25197	1.57591	2.7797	1.52808	5.68154	3.19552	1.334	0	0	0	0	0	0	0
321	BrCCc1ccccc1	2-BROMOETHYLBENZENE	182.848	0	0	0	0	0	0	0	0	0	0	0	0	0	0	0	0	0.263752	3.18732	6.97628	15.5981	16.4938	15.3662	12.9254	9.67687	6.82912	9.19204	12.7654	7.37042	8.75709	9.39411	19.5971	14.8495	13.3443	0.721453	0	0	0	0	0	0	0	0	0	0	0	0
322	Clc1ccc(Cl)c(Cl)c1	1,2,4-TRICHLOROBENZENE	176.562	0	0	0	0	0	0	0	0	0	0	0	0	0	0	0.000415	1.04971	5.73739	5.34331	3.82925	5.04331	3.80027	8.07761	5.14867	2.76681	16.9903	18.4284	25.8715	22.3119	29.7121	19.2762	2.91809	0	0	0	0	0	0	0	0	0	0	0	0	0	0	0
323	CC(C)(C)C	NEOPENTANE	125.335	0	0	0	0	0	0	0	0	0	0	0	0	0	0	0	0	0	0	0	0	0	1.57576	16.413	22.3778	25.7029	11.2919	12.0671	15.201	23.0834	2.53693	0	0	0	0	0	0	0	0	0	0	0	0	0	0	0	0
324	CC(C)C[C@H](C)O	4-METHYL-2-PENTANOL	157.42	0	0	0	0	0	0	0	0	0	0.206401	0.468364	1.6059	0.366795	0.545104	0.873648	0.863821	0.787832	1.20502	0.656158	1.08191	3.35663	7.01074	21.7596	24.5945	20.3636	14.1743	13.9239	19.3992	9.05353	1.49501	0.858501	0.928084	1.45601	0.78796	0.955998	0.457659	1.77974	1.86023	1.31018	1.87196	2.36006	1.19001	0	0	0	0
325	c1ccc(-c2ccccc2)cc1	BIPHENYL	204.94	0	0	0	0	0	0	0	0	0	0	0	0	0	0	0	0	0	0	1.34552	14.7857	20.377	18.7915	14.3166	10.5191	12.8808	9.71015	10.7411	17.3822	15.8855	24.8644	18.9256	9.93092	0.415365	0	0	0	0	0	0	0	0	0	0	0	0	0
326	c1ccc(Cc2ccccc2)cc1	DIPHENYLMETHANE	225.424	0	0	0	0	0	0	0	0	0	0	0	0	0	0	0	0	0.730696	0.937744	4.36703	19.5803	23.5823	19.9484	15.4752	10.2593	8.99709	14.2387	13.1721	8.77502	17.7797	9.94401	19.8174	14.3051	15.0501	2.30953	0	0	0	0	0	0	0	0	0	0	0	0
327	c1ccc(CCc2ccccc2)cc1	1,2-DIPHENYLETHANE	247.003	0	0	0	0	0	0	0	0	0	0	0	0	0	0	0	0	0	0	1.26562	16.2159	26.9226	27.7917	21.4068	15.8624	12.6335	11.4287	14.1147	9.61244	17.0175	9.74472	17.6017	15.5998	16.5179	4.55704	0	0	0	0	0	0	0	0	0	0	0	0
328	CC[C@@H](C)c1ccccc1	SEC-BUTYLBENZENE	197.01	0	0	0	0	0	0	0	0	0	0	0	0	0	0	0	0	0	0	0.450198	7.30453	10.3225	16.6304	20.2361	21.6598	19.0582	16.327	17.4388	16.9497	11.626	5.90255	8.63792	7.79777	8.30088	3.18822	0.033787	0	0	0	0	0	0	0	0	0	0	0
329	C=C(C)CCC	2-METHYL-1-PENTENE	140.804	0	0	0	0	0	0	0	0	0	0	0	0	0	0	0	0	0	0	0	0	1.22769	9.80118	19.3558	23.054	18.6837	17.2085	20.9724	16.8262	5.7698	4.91938	3.42281	2.97153	2.97377	2.01792	0.217447	0	0	0	0	0	0	0	0	0	0	0
330	C=CCC(C)C	4-METHYL-1-PENTENE	141.581	0	0	0	0	0	0	0	0	0	0	0	0	0	0	0	0	0	0	0	0.828739	4.55186	9.69447	19.5224	22.1737	17.6419	15.3408	15.1785	16.7868	10.1115	4.24259	2.49666	2.83548	3.24699	2.22715	1.81287	0.11192	0	0	0	0	0	0	0	0	0	0
331	C=C[C@@H]1C[C@@H]2C=C[C@H]1C2	VINYLNORBORNENE	170.682	0	0	0	0	0	0	0	0	0	0	0	0	0	0	0	0	0	0	0.051561	2.18156	7.41691	16.1694	21.4712	20.4508	17.3209	17.1361	16.6799	12.8943	8.30363	6.80658	4.48611	5.19691	4.82629	2.62687	2.6815	0.724011	0	0	0	0	0	0	0	0	0	0
332	C/C=C1\C[C@@H]2C=C[C@H]1C2	5-ETHYLIDENE-2-NORBORNENE	169.362	0	0	0	0	0	0	0	0	0	0	0	0	0	0	0	0	0	0	0.115621	1.96737	5.291	17.0908	19.748	22.6196	16.8201	18.5217	20.0133	14.1148	7.44571	3.83035	5.60303	5.50872	3.60759	4.00601	1.86167	0.413672	0	0	0	0	0	0	0	0	0	0
333	N#CBr	CYANOGENBROMIDE	70.9288	0	0	0	0	0	0	0	0	0	0	0	0.058657	0.537393	1.24785	2.05753	0	0.558278	3.41604	2.28074	0.084748	0	10.8139	10.3701	12.3857	9.68146	3.62304	3.21648	0.437848	2.18338	0.926071	2.48839	3.17892	4.6039	6.07538	4.46627	3.14445	0.352761	0	0	0	0	0	0	0	0	0
334	C1=CCCC=CCC1	1,5-CYCLOOCTADIENE	157.794	0	0	0	0	0	0	0	0	0	0	0	0	0	0	0	0	0	0	0	0.063703	1.79547	14.7476	22.1237	27.5969	20.6788	17.8234	12.3626	5.84432	7.68035	5.5324	4.89919	4.75439	4.0616	4.57626	2.05541	0.275842	0	0	0	0	0	0	0	0	0	0
335	C1=C[C@@H]2[C@H]3C=C[C@H](C3)[C@@H]2C1	DICYCLOPENTADIENE	175.394	0	0	0	0	0	0	0	0	0	0	0	0	0	0	0	0	0	0	0	1.34675	5.7509	11.3508	18.5602	22.0656	20.8172	21.5262	20.7433	14.8004	8.29044	5.02414	6.82553	4.30456	3.89328	1.50495	0.604508	0.007746	0	0	0	0	0	0	0	0	0	0
336	CCCCCCCCCCCCCCCCCCCC	N-EICOSANE	452.325	0	0	0	0	0	0	0	0	0	0	0	0	0	0	0	0	0	0	0	0	0	0.910822	21.2066	70.7707	103.289	80.7235	71.0582	40.2694	44.014	4.29792	0	0	0	0	0	0	0	0	0	0	0	0	0	0	0	0
337	Cc1cc(C)cc(C)c1	MESITYLENE	175.554	0	0	0	0	0	0	0	0	0	0	0	0	0	0	0	0	0	0	0	0.898329	12.7644	20.1007	23.0664	16.7348	14.3008	14.5143	22.4138	15.5758	6.21788	6.31171	5.89482	8.94888	7.1138	3.24597	0.729084	0	0	0	0	0	0	0	0	0	0	0
338	CC(=O)OCc1ccccc1	BENZYL_ACETATE	191.938	0	0	0	0	0	0	0	0	0	0	0	0	0	0	0	0	0	0.998714	9.97041	16.8702	20.0916	13.7459	14.9957	15.9304	14.7116	9.35406	7.31981	8.09061	10.7873	9.14739	11.5249	10.2755	6.31011	1.69265	2.28134	2.36604	5.02047	3.18854	1.14592	0.082118	0	0	0	0	0	0
339	Cc1ccccc1[N+](=O)[O-]	O-NITROTOLUENE	161.873	0	0	0	0	0	0	0	0	0	0	0	0	0	0	0	0	0	4.0787	9.51043	11.767	11.2993	10.6829	9.96061	9.51107	12.1465	15.3765	9.70676	10.1122	12.7946	7.69385	3.24647	7.17913	5.77011	4.4199	2.88833	1.66326	3.22868	1.30087	0.033501	0	0	0	0	0	0	0
340	Cc1cccc([N+](=O)[O-])c1	M-NITROTOLUENE	163.095	0	0	0	0	0	0	0	0	0	0	0	0	0	0	0	0	0.004134	3.68559	7.88059	12.2817	12.1808	10.3147	11.2144	12.0916	10.9175	17.8831	9.4906	12.1077	10.2553	6.60818	3.377	9.40443	6.15515	4.40124	2.23357	2.07008	3.15384	0.77464	0	0	0	0	0	0	0	0
341	Cc1ccc([N+](=O)[O-])cc1	P-NITROTOLUENE	163.12	0	0	0	0	0	0	0	0	0	0	0	0	0	0	0	0	0.079836	4.11362	7.70219	12.9575	11.4222	11.2962	11.0733	11.0916	12.2338	17.4672	8.44437	11.0754	12.1865	4.8098	3.19584	8.09062	7.67108	4.34569	2.64655	1.97897	3.11334	1.29502	0.028802	0	0	0	0	0	0	0
342	ClCc1ccccc1	BENZYL_CHLORIDE	154.028	0	0	0	0	0	0	0	0	0	0	0	0	0	0	0	0	1.26811	4.32777	6.92063	13.0406	13.4543	8.68578	9.08496	6.42977	10.3692	5.94	8.33382	11.7215	10.2565	10.4851	18.3677	14.0637	6.17081	0	0	0	0	0	0	0	0	0	0	0	0	0
343	CCOCCOCCOCC	DIETHYLENE_GLYCOL_DIETHYL_ETHER	222.747	0	0	0	0	0	0	0	0	0	0	0	0	0	0	0	0	0	0	0	0.045142	8.00751	36.297	41.9731	30.5412	25.5864	20.6202	21.7843	9.83884	3.31895	3.80028	2.31779	2.2038	1.61463	2.1212	5.46023	7.80274	3.6076	3.82576	4.11506	0.640005	0	0	0	0	0	0
344	CCCCCCCCCC(=O)O	N-DECANOIC_ACID	246.864	0	0	0	0	0	0	0	0.408585	1.30973	0.148845	1.38679	1.29876	0.836553	0.239839	0.278558	0.364295	1.21297	0.760706	1.2358	5.01876	3.93437	5.68732	18.0726	38.6589	45.5197	33.8131	26.1677	19.7436	14.1427	2.5469	3.53235	2.55207	1.04659	5.24049	2.96136	4.53416	5.49411	2.26308	0.219545	0	0	0	0	0	0	0
345	c1ccc2cnccc2c1	ISOQUINOLINE	162.732	0	0	0	0	0	0	0	0	0	0	0	0	0	0	0	0	0	1.77182	15.3486	15.4973	12.0981	7.88682	7.83367	6.5826	7.07139	8.49488	10.2557	15.4594	18.7269	15.917	8.20332	1.28878	0.499671	2.19758	1.35444	0.596563	1.48038	1.23859	1.05294	0.725679	1.10668	1.00817	0.526114	0.121507	0	0
346	Cc1ccc2ccccc2n1	QUINALDINE	183.485	0	0	0	0	0	0	0	0	0	0	0	0	0	0	0	0	0	1.28964	9.56714	13.9125	15.553	14.9592	10.3317	10.3857	10.593	12.4767	11.175	14.2061	17.3521	15.85	11.165	4.43786	0.783661	0.589191	1.64429	0.885238	1.1787	1.69013	1.12794	0.958116	0.357358	0.801292	0.412607	0	0	0
347	c1ccc(Oc2ccccc2)cc1	DIPHENYL_ETHER	214.599	0	0	0	0	0	0	0	0	0	0	0	0	0	0	0.382448	1.02551	1.41006	2.23046	8.87384	18.0952	19.4351	11.5709	9.64442	11.1643	10.9125	11.9271	8.3395	19.2611	18.8282	14.5641	22.0721	17.3559	5.92526	0	0	0	0	0	0	0	0	0	0	0	0	0
348	CC(C)CCSCCC(C)C	DIISOPENTYLSULFIDE	262.706	0	0	0	0	0	0	0	0	0	0	0	0	0	0	0	0	0	0	0	0.377247	5.24672	14.9605	36.6539	40.5783	38.2093	27.8346	21.5839	27.1894	14.5959	3.696	4.02677	2.77123	4.77017	1.26585	2.26187	2.33604	2.40749	1.69951	0.568586	0	0	0	0	0	0	0
349	C=C1[C@@H]2CC[C@@H](C2)C1(C)C	CAMPHENE	198.543	0	0	0	0	0	0	0	0	0	0	0	0	0	0	0	0	0	0	0	0.014087	1.93321	11.5441	24.8218	28.463	22.5098	18.3069	18.3961	27.3731	11.6429	3.34472	3.20036	2.29412	2.50795	2.93433	0.973213	0.37835	0	0	0	0	0	0	0	0	0	0
350	CC1=CCC(=C(C)C)CC1	TERPINOLENE	202.527	0	0	0	0	0	0	0	0	0	0	0	0	0	0	0	0	0	0	0	0.229668	3.90721	17.1605	24.0065	31.1622	20.8914	21.102	24.7785	17.344	10.8718	5.73399	4.56233	5.08054	5.13947	3.20033	1.13151	0	0	0	0	0	0	0	0	0	0	0
351	CCCCCCCCCCCO	1-UNDECANOL	266.801	0	0	0	0	0	0	0	0	0	0.290042	0.712276	1.51871	0.069811	0.789345	1.03533	1.21259	0.651516	0.614737	0.745334	1.16751	2.2381	6.05165	21.3112	43.6891	52.3736	40.0716	32.8307	22.0811	19.0291	2.41671	1.05003	1.21417	0.978056	1.05061	1.14826	0.859979	1.1425	1.95595	1.70938	2.39434	1.97516	0.853586	0	0	0	0
352	CCCCCCCCCCCCCCCC	N-HEXADECANE	364.781	0	0	0	0	0	0	0	0	0	0	0	0	0	0	0	0	0	0	0	0	0	0.921542	18.1422	57.9705	83.4272	64.0945	58.0445	35.3539	36.2185	2.69248	0	0	0	0	0	0	0	0	0	0	0	0	0	0	0	0
353	CCCCOC(=O)c1ccccc1C(=O)OCCCC	DI-N-BUTYL_PHTHALATE	361.271	0	0	0	0	0	0	0	0	0	0	0	0	0	0	0	0	0	0.53995	5.66548	11.465	14.397	24.2226	47.871	45.712	35.9183	30.2193	27.862	34.3779	19.8009	2.94252	3.04932	4.4613	4.2048	6.55968	4.73743	8.25238	10.0681	1.72102	0	0	0	0	0	0	0	0
354	CCCCOC(=O)CCCCCCCCC(=O)OCCCC	DIBUTYL_SEBACATE	438.657	0	0	0	0	0	0	0	0	0	0	0	0	0	0	0	0	0	0	0.712773	7.89161	14.3171	29.5517	62.2609	73.7061	60.4275	45.0946	35.5753	30.157	10.5693	5.67639	6.87861	4.04237	4.16946	3.88774	3.67379	4.16389	6.18317	10.3482	4.98738	1.67176	0.152906	0	0	0	0	0
355	CC(C)C1=CC2=CC[C@H]3[C@](C)(C(=O)O)CCC[C@]3(C)[C@H]2CC1	ABIETIC_ACID	398.133	0	0	0	0	0	0	0	0.397234	1.20488	0.298743	1.25989	1.11314	1.00768	0.234021	0.280029	0.375456	1.04568	0.808593	0.452053	1.00435	2.37464	16.3208	44.4944	48.4051	41.793	40.0045	34.5446	28.5203	10.4057	7.53558	7.35086	8.54952	8.0963	4.5812	1.5901	3.20412	5.37951	1.56103	0.042104	0	0	0	0	0	0	0
356	c1ccc(-c2cccc(-c3ccccc3)c2)cc1	M-TERPHENYL	295.331	0	0	0	0	0	0	0	0	0	0	0	0	0	0	0	0	2.52427	5.08515	15.0422	23.4168	22.843	15.287	14.7573	8.55484	14.781	15.0183	9.25574	19.568	23.3175	26.2213	31.6826	23.1094	5.20049	0	0	0	0	0	0	0	0	0	0	0	0	0
357	Cc1ccc(C)c(C)c1	1,2,4-TRIMETHYLBENZENE	175.151	0	0	0	0	0	0	0	0	0	0	0	0	0	0	0	0	0	0	0	1.66959	12.4354	19.7693	22.6011	16.2794	14.1376	14.013	22.2133	14.6765	5.84986	6.69819	5.45357	8.36365	6.83362	4.18274	0.908335	0	0	0	0	0	0	0	0	0	0	0
358	Cc1cccc(C)c1C	1,2,3-TRIMETHYLBENZENE	173.478	0	0	0	0	0	0	0	0	0	0	0	0	0	0	0	0	0	0	0	2.91282	13.8118	18.919	19.9711	15.6681	14.4571	15.486	19.2903	12.7746	5.61711	8.06909	4.58338	8.69131	5.59742	5.18261	1.62845	0.001114	0	0	0	0	0	0	0	0	0	0
359	CN(C)C	TRIMETHYLAMINE	97.9956	0	0	0	0	0	0	0	0	0	0	0	0	0	0	0	0	0	0	0	0	3.89648	11.1671	13.1968	12.0322	16.9412	17.0089	18.7642	6.1939	1.31469	0.813961	1.33971	1.74797	0.669397	0.026775	0.099305	0.979295	0.052899	1.82169	0.811517	0.101562	0.230808	1.07393	0.601075	0.232619	0.078531	0
360	CCCCCCCCCCCCO	1-DODECANOL	288.374	0	0	0	0	0	0	0	0	0	0.290322	0.715767	1.51376	0.070994	0.811948	1.01403	1.20646	0.659256	0.616596	0.75319	1.18081	2.21225	6.1127	21.9274	46.7312	57.5582	43.9393	36.3814	23.5077	21.0159	2.59344	1.05214	1.22587	0.959836	1.06977	1.14659	0.848038	1.15431	1.95503	1.70484	2.3942	1.97806	0.851064	0	0	0	0
361	CCCCCCCCCc1ccccc1	N-NONYLBENZENE	305.336	0	0	0	0	0	0	0	0	0	0	0	0	0	0	0	0	0	0	0.381534	6.39531	9.42149	14.8691	25.4423	42.8122	47.849	36.8975	33.0751	21.9446	23.3371	6.59876	7.19907	9.29346	7.86874	3.69921	0.109726	0	0	0	0	0	0	0	0	0	0	0
362	FC(F)(F)C(F)(F)Cl	CHLOROPENTAFLUOROETHANE	122.791	0	0	0	0	0	0	0	0	0	0	0	0	0	0	0	0	0	0.488388	1.4583	1.5675	0.091341	3.34149	3.15186	1.72885	10.9519	47.6251	54.9522	4.17365	0	0	0	0	0	0	0	0	0	0	0	0	0	0	0	0	0	0
363	FC(F)(Cl)C(F)(F)Cl	1,2-DICHLOROTETRAFLUOROETHANE	136.203	0	0	0	0	0	0	0	0	0	0	0	0	0	0	0	0	0	0.746393	1.82529	4.4567	0	3.96403	6.24618	1.11327	6.80604	36.9875	62.8624	14.1468	0	0	0	0	0	0	0	0	0	0	0	0	0	0	0	0	0	0
364	FC(Cl)Cl	DICHLOROFLUOROMETHANE	90.8471	0	0	0	0	0	0	0	0	0	0	0	0	2.56409	2.29505	1.45884	1.20067	0.623273	0.561835	0.543376	2.47109	3.99453	4.8469	1.08987	7.21494	5.29179	2.11277	9.30242	21.038	26.0878	12.6441	0	0	0	0	0	0	0	0	0	0	0	0	0	0	0	0
365	CCCCCCCCCCCCCCCCC	N-HEPTADECANE	386.49	0	0	0	0	0	0	0	0	0	0	0	0	0	0	0	0	0	0	0	0	0	0.914224	18.5097	60.6869	89.5772	67.7802	61.4436	37.1783	37.8107	2.67855	0	0	0	0	0	0	0	0	0	0	0	0	0	0	0	0
366	CC(C)(C)OOC(C)(C)C	DI-T-BUTYL_PEROXIDE	217.579	0	0	0	0	0	0	0	0	0	0	0	0	0	0	0	0	0	0	0	0.226371	4.89008	20.8699	24.6875	29.8025	21.2522	19.2254	25.2671	31.1854	7.10985	1.951	1.69164	1.43011	2.60908	2.27041	1.75604	1.62361	1.29067	1.68306	1.67206	0.019998	0	0	0	0	0	0
367	CC(C)(C)OO	T-BUTYL_HYDROPEROXIDE	127.331	0	0	0	0	0	0	0	0.041273	0.382542	1.44064	0.510483	0.542457	1.07566	0.392623	1.20614	1.1842	0.275175	0.436613	0.453447	0.864279	5.30687	14.5202	17.1698	12.7086	9.6202	9.88243	18.4134	9.56666	2.44455	1.71032	1.27771	1.78208	1.30522	3.14566	3.28107	3.06341	2.80056	3.60709	1.94315	0.639627	0	0	0	0	0	0
368	CC(=O)C=C(C)C	MESITYL_OXIDE	143.283	0	0	0	0	0	0	0	0	0	0	0	0	0	0	0	0	0	0	0.726197	8.66479	16.1705	17.9919	12.5219	11.1274	14.6308	17.6359	13.5288	7.72687	4.86126	5.07151	3.58643	0.867409	0.510881	1.66385	1.48355	2.4793	2.27473	4.20284	2.27722	1.19061	1.171	0.026714	0	0	0	0
369	CCCCC#CO	2-Hexyn-1-ol	145.773	0	0	0	0	0.097184	1.01043	2.00593	0.281915	0.836839	1.68275	0.992955	0.429172	0.375989	0.261016	0.577251	0.183627	0.619782	0.715097	0.799218	0.507394	3.42231	5.87594	15.9441	18.7842	19.5948	13.1956	12.0814	12.648	7.27949	5.8595	8.56137	6.83847	10.0519	7.20368	1.23262	0	0	0	0	0	0	0	0	0	0	0
370	C=C(C)CC(C)(C)C	2,4,4-TRIMETHYL-1-PENTENE	185.003	0	0	0	0	0	0	0	0	0	0	0	0	0	0	0	0	0	0	0	0.018435	1.79931	9.78778	25.7024	28.9051	20.7435	15.8191	18.979	20.9869	15.8519	5.03041	3.59054	2.27394	2.2767	1.43401	0.783719	0.467666	0	0	0	0	0	0	0	0	0	0
371	CC(=O)OCCOC(C)=O	ETHYLENE_GLYCOL_DIACETATE	177.649	0	0	0	0	0	0	0	0	0	0	0	0	0	0	0	0	0	1.80858	13.8938	18.0702	16.9298	15.2746	15.8124	22.2667	14.8132	6.8712	3.63167	3.50724	5.88627	3.25798	5.32754	5.4136	4.96661	4.18014	4.64394	5.34342	10.4579	5.33056	2.16075	0.099889	0	0	0	0	0	0
372	FC(F)(F)P(Cl)C(F)(F)F	BIS(TRIFLUOROMETHYL)CHLOROPHOSPHINE	162.343	0	0	0	0	0	0	0	0	0	0	0	0	0	0	0	0	0	0.175666	2.20743	3.76762	5.57714	6.0778	4.43672	6.22324	7.93895	26.228	63.8664	30.6016	1.26767	0	0	0	0	0	0	0	0	0	0	0	0	0	0	0	0	0
373	FC(F)(F)P(I)C(F)(F)F	BIS(TRIFLUOROMETHYL)IODOPHOSPHINE	179.333	0	0	0	0	0	0	0	0	0	0	0	0	0	0	0	0.343573	0.512302	2.89254	0.908552	4.5076	5.66915	7.70266	5.25384	3.72853	9.32871	23.4385	55.2664	46.5301	3.57963	0	0	0	0	0	0	0	0	0	0	0	0	0	0	0	0	0
374	Br/C=C\Br	CIS-1,2-DIBROMOETHYLENE	110.696	0	0	0	0	0	0	0	0	0	0	0	0	0	0	1.41779	5.34134	3.97022	2.28838	3.2618	3.17375	5.68237	1.51935	2.54947	10.8614	7.41299	2.68441	3.75164	17.4833	16.7787	25.219	8.75297	0.193445	0	0	0	0	0	0	0	0	0	0	0	0	0	0
375	CC(C)COCC(C)C	DIISOBUTYL_ETHER	203.721	0	0	0	0	0	0	0	0	0	0	0	0	0	0	0	0	0	0	0	0	0	6.66767	30.5133	38.9712	28.9273	22.7306	19.4748	27.6285	15.5229	3.51127	1.65789	1.64017	0.958173	1.47867	0.977468	1.30929	1.80233	0.352626	0	0	0	0	0	0	0	0
376	Br/C=C/Br	TRANS-1,2-DIBROMOETHYLENE	111.039	0	0	0	0	0	0	0	0	0	0	0	0	0	0.117145	2.37327	4.90153	1.56161	2.25851	3.51099	2.84224	5.83817	1.8378	1.81894	11.8765	5.89789	5.4869	7.01274	19.242	18.8459	25.672	3.33833	0	0	0	0	0	0	0	0	0	0	0	0	0	0	0
377	I/C=C\I	CIS-1,2-DIIODOETHYLENE	131.298	0	0	0	0	0	0	0	0	0	0	0	0	0	0	1.21675	4.29676	3.94971	4.10212	5.4417	5.16348	1.67685	2.02913	9.34679	9.3747	3.95672	1.39003	11.2787	19.1954	17.9462	29.1729	8.07482	0.010662	0	0	0	0	0	0	0	0	0	0	0	0	0	0
378	I/C=C/I	TRANS-1,2-DIIODOETHYLENE	131.605	0	0	0	0	0	0	0	0	0	0	0	0	0	0.083362	2.76945	3.86184	2.71924	3.02151	5.19505	5.08982	0.914939	1.62709	11.0314	8.27009	3.44571	4.83477	13.4546	22.1529	19.758	28.8973	3.43528	0	0	0	0	0	0	0	0	0	0	0	0	0	0	0
379	CN=C=S	METHYLISOTHIOCYANATE	92.8803	0	0	0	0	0	0	0	0	0	0	0	0	0	0	0	0	0	2.59165	7.51004	7.54478	4.90966	7.2364	9.44013	6.43687	3.09253	7.57906	6.21581	7.91606	8.53544	10.2519	6.52088	13.0005	2.2517	0	0	0	0	0	0	0	0	0	0	0	0	0
380	Cc1cc(C)nc(C)c1	2,4,6-TRIMETHYLPYRIDINE	169.527	0	0	0	0	0	0	0	0	0	0	0	0	0	0	0	0	0	0	0.774894	5.24962	17.7226	16.9096	19.4092	13.0885	12.9262	22.3839	17.2727	9.52208	8.4241	9.83293	8.89212	1.16416	1.52991	0.676236	1.02299	1.19588	0.777071	1.47755	0.815256	1.32437	0.96237	0.508973	0.403389	0.629203	0.080873	0
381	COC	DIMETHYL_ETHER	71.2802	0	0	0	0	0	0	0	0	0	0	0	0	0	0	0	0	0	0	0	2.13929	4.48651	13.6988	13.4671	9.85865	13.99	8.70973	3.19391	2.01336	1.34989	1.92972	1.51149	1.11677	1.63814	0.415057	0.954582	2.1252	1.05116	2.19979	1.94994	1.50121	0	0	0	0	0	0
382	CCl	METHYL_CHLORIDE	60.396	0	0	0	0	0	0	0	0	0	0	0	0	0	0	0	0	0	2.48628	6.98006	5.55784	4.37201	4.12191	7.39861	4.75084	4.15351	2.10716	2.51922	5.09306	4.04889	0.089392	6.15914	9.43141	8.19268	0.669609	0	0	0	0	0	0	0	0	0	0	0	0
383	CCCCN=C=O	N-BUTYL_ISOCYANATE	140.22	0	0	0	0	0	0	0	0	0	0	0	0	0	0	0	0	0	0	0.480665	4.3134	6.0603	12.0371	20.8368	20.7789	19.043	15.4016	10.8791	12.7738	3.7106	4.25052	2.46864	5.80088	7.62292	7.83655	0.109132	0	0	0	0	0	0	0	0	0	0	0
384	C=CCCCCCCCCC	1-UNDECENE	251.487	0	0	0	0	0	0	0	0	0	0	0	0	0	0	0	0	0	0	0	0.69851	4.29215	7.67155	22.62	41.2626	46.4883	36.7134	32.6998	22.6156	19.8613	4.59318	2.59633	2.8553	3.18481	2.20566	2.16239	0.11628	0	0	0	0	0	0	0	0	0	0
385	CCOC(=O)c1ccccc1C(=O)OCC	DIETHYL_PHTHALATE	277.58	0	0	0	0	0	0	0	0	0	0	0	0	0	0	0	0	0	3.73173	9.56054	13.4094	22.2463	25.7971	24.0888	21.6701	15.6196	20.5291	12.4328	14.6163	15.9511	11.1971	4.45323	5.99415	5.28123	3.84475	3.84974	6.39296	9.24863	4.02892	0.816396	0	0	0	0	0	0	0
386	C#CCCCC	1-HEXYNE	135.915	0	0	0	0	0	0	0	0	0	0	0	0	0.036392	0.572068	1.36468	1.81387	1.17878	0.236861	1.43213	3.56657	5.21844	7.4212	18.486	21.2511	15.7224	10.4704	11.6167	14.6078	5.66549	2.71357	2.66884	6.15328	4.6175	8.67457	3.37954	0	0	0	0	0	0	0	0	0	0	0
387	C#CCCCCC	1-HEPTYNE	158.142	0	0	0	0	0	0	0	0	0	0	0	0	0.031459	0.577001	1.34218	1.82598	1.18918	0.253022	1.4245	3.59075	5.15185	6.31715	19.7201	25.0449	22.3053	13.4421	13.923	16.1443	7.84319	3.4936	2.22226	6.15916	4.88333	8.64886	3.21348	0	0	0	0	0	0	0	0	0	0	0
388	C1CCNC1	PYRROLIDINE	103.883	0	0	0	0	0	0	0	0	0	0	0	0	0	0	0.24068	1.4106	1.33847	0.923285	1.05625	0.606844	1.48371	4.43543	12.737	18.913	23.0641	14.5231	13.1712	9.60386	1.62108	0.616089	0.428959	0.877899	0.985258	0.532697	1.24277	0.254499	0.427515	0.71587	0.376998	0.95615	0.313237	0	0.951102	1.03252	0.653927	0.201743
389	C=CCOC(C)=O	ALLYL_ACETATE	134.534	0	0	0	0	0	0	0	0	0	0	0	0	0	0	0	0	0	0.650795	7.19656	13.077	15.395	12.1351	10.7416	14.1524	11.7222	7.60265	8.36752	5.83242	4.48904	3.82385	6.20959	5.44899	4.67355	3.34921	2.38138	2.06975	5.0109	3.26078	1.55373	0.149282	0	0	0	0	0	0
390	CC(C)=C(C)C	2,3-DIMETHYL-2-BUTENE	138.049	0	0	0	0	0	0	0	0	0	0	0	0	0	0	0	0	0	0	0	1.17868	3.08772	12.1441	16.5234	22.2695	12.9268	13.2957	17.494	21.9994	10.0403	3.72259	2.96283	2.98622	2.15154	2.09728	0.311417	0	0	0	0	0	0	0	0	0	0	0
391	c1cscn1	THIAZOLE	98.2556	0	0	0	0	0	0	0	0	0	0	0	0	0	0	0.347657	3.69184	5.15495	4.87031	5.22924	3.06869	5.99129	4.30497	4.17166	4.70813	7.98133	8.08346	6.90756	8.39384	9.92216	7.52223	5.20604	1.51068	1.80127	1.71946	0.950217	2.23325	1.56298	0.879345	1.0126	1.24283	1.16391	0.320886	0	0	0	0
392	BrCC(Br)CBr	1,2,3-TRIBROMOPROPANE	168.27	0	0	0	0	0	0	0	0	0	0	0	0	0	0	0.377415	3.48119	6.69796	7.94217	6.96861	6.75569	5.9694	7.88849	7.35313	2.25507	6.85044	15.0905	8.84304	5.33974	13.0943	22.577	20.9064	13.8037	1.6736	0	0	0	0	0	0	0	0	0	0	0	0	0
393	CCN=C=S	ETHYLISOTHIOCYANATE	114.155	0	0	0	0	0	0	0	0	0	0	0	0	0	0	0	0	0	0.189613	5.05248	5.95728	9.41714	10.2967	13.2595	10.0055	5.62583	12.0328	9.64894	8.49662	8.52626	10.649	6.61322	13.0612	2.63884	0	0	0	0	0	0	0	0	0	0	0	0	0
394	CC(C)C1CCCCC1	ISOPROPYLCYCLOHEXANE	193.438	0	0	0	0	0	0	0	0	0	0	0	0	0	0	0	0	0	0	0	0	0	0.889484	13.2465	28.1186	39.4637	30.6304	28.6814	25.3101	16.1297	1.41556	0	0	0	0	0	0	0	0	0	0	0	0	0	0	0	0
395	O=C(O)C(F)(F)F	TRIFLUOROACETIC_ACID	99.6044	0	0	0	0	0.516562	1.32845	0.82035	1.78848	1.24865	0.166189	0.157329	0.951995	1.40167	0.129508	0.512809	0.570171	0.211102	0.30651	1.43824	3.55217	3.65434	2.35928	1.36668	3.28393	4.23238	8.64124	23.6758	24.2601	3.72373	4.22902	5.23565	2.17241	3.13533	5.87991	2.72081	0.213698	0	0	0	0	0	0	0	0	0	0
396	C=CCCCCC	1-HEPTENE	163.396	0	0	0	0	0	0	0	0	0	0	0	0	0	0	0	0	0	0	0	0.701491	4.28079	7.91088	20.5964	26.9979	26.7329	21.0598	18.7758	16.957	11.4975	4.44606	2.25602	3.14113	3.6486	1.61335	2.34304	0.079369	0	0	0	0	0	0	0	0	0	0
397	C=CCCC=C	1,5-HEXADIENE	136.093	0	0	0	0	0	0	0	0	0	0	0	0	0	0	0	0	0	0	0	2.4119	11.6841	17.0091	19.9243	13.6299	14.7318	14.1677	8.63895	4.94252	11.1587	7.28212	3.14584	6.64496	5.74172	3.74389	3.71901	0.052249	0	0	0	0	0	0	0	0	0	0
398	CCCOC(=O)CCC	N-PROPYL_N-BUTYRATE	182.546	0	0	0	0	0	0	0	0	0	0	0	0	0	0	0	0	0	0	0.535689	3.73347	7.64371	20.2423	27.5868	29.3187	21.2002	19.089	16.8862	14.0114	3.8651	2.41057	2.08142	2.24944	3.52719	1.82199	3.0547	2.7765	3.98271	4.56956	1.50884	0.132862	0	0	0	0	0	0
399	C#CCCC	1-PENTYNE	114.009	0	0	0	0	0	0	0	0	0	0	0	0	0.03044	0.57802	1.35657	1.83706	1.16371	0.274558	1.44887	3.49976	5.32046	10.3421	13.7134	17.6316	9.76953	8.95981	9.92113	10.9455	4.07335	2.76624	2.61307	6.24615	4.68777	8.6665	3.17391	0	0	0	0	0	0	0	0	0	0	0
400	CCCCCCCCCCCCCCCCCCCCCC	N-DOCOSANE	495.483	0	0	0	0	0	0	0	0	0	0	0	0	0	0	0	0	0	0	0	0	0	0.949076	22.2665	76.9173	113.626	88.6265	77.7717	43.2808	47.6258	4.64595	0	0	0	0	0	0	0	0	0	0	0	0	0	0	0	0
401	CCOc1ccccc1	PHENETOLE	163.71	0	0	0	0	0	0	0	0	0	0	0	0	0	0	0	0	0	0.236535	2.51035	11.6415	18.1564	17.8109	15.8965	11.1131	11.2722	10.1554	12.3559	5.04671	9.42374	7.72799	10.6641	9.58369	9.28472	4.41383	1.08142	1.59764	1.03175	0	0	0	0	0	0	0	0	0
402	CCP(=O)(OC)OC	DIMETHYLETHYLPHOSPHONATE	169.458	0	0	0	0	0	0	0	0	0	0	0	0	0	0	0	0	0	0.48899	6.1283	13.3632	15.5009	14.694	21.3379	20.2959	13.5375	10.6174	9.75603	4.69212	4.16141	2.14715	2.89692	3.61146	4.4844	3.36131	2.53944	3.25567	2.60413	0.375481	3.13554	5.83016	2.27183	0.032186	0	0	0	0
403	CCCCCCCCOC(C)=O	N-OCTYL_ACETATE	249.441	0	0	0	0	0	0	0	0	0	0	0	0	0	0	0	0	0	0.381364	3.11441	5.27203	9.5512	12.4489	26.1829	42.6006	42.7263	29.4952	22.716	16.6943	12.3947	3.20054	1.69733	1.89166	3.63407	2.47452	2.92738	2.69215	4.33178	4.15301	2.19472	0.365387	0	0	0	0	0	0
404	CC1=CC(=O)CC(C)(C)C1	ISOPHORONE	194.38	0	0	0	0	0	0	0	0	0	0	0	0	0	0	0	0	0	0	0.388453	7.88318	14.3899	25.2855	22.0986	19.4052	15.9185	16.2113	16.2824	14.4183	5.91662	2.24315	2.05237	0.811685	0.241157	1.02662	0.967575	2.52151	1.74762	5.7204	3.63618	2.19302	2.50041	0.44904	0	0	0	0
405	CCCCC(C)=O	2-HEXANONE	151.389	0	0	0	0	0	0	0	0	0	0	0	0	0	0	0	0	0	0.019222	1.76654	8.37093	10.4771	11.3071	17.5774	22.3593	22.5567	15.1616	12.1681	12.1737	4.50959	1.98879	1.02363	0.618251	0.850219	1.52207	2.53022	0.567288	4.28095	4.49819	1.97296	2.12378	0.505876	0	0	0	0	0
406	CCOC(=O)CC(C)C	ETHYL_ISOVALERATE	182.918	0	0	0	0	0	0	0	0	0	0	0	0	0	0	0	0	0	0	1.19245	4.05824	11.6032	17.3558	24.6157	24.2936	22.7846	17.8591	14.8584	16.2815	5.66612	3.03557	1.9074	1.69319	3.96375	1.65128	3.69976	2.37152	3.4625	4.30663	1.3859	0	0	0	0	0	0	0
407	O=[N+]([O-])c1ccc(O)cc1	4-NITROPHENOL	151.757	0	0	0	0	0	0.207052	1.10133	1.13088	0.868505	0.947752	1.43245	0.762357	0.613251	0.907731	0.878693	1.26074	1.6348	6.03094	7.61069	5.74045	5.42508	5.77509	6.10717	9.59701	8.34403	16.1113	13.7336	10.7675	4.3885	3.94722	6.42738	5.83506	11.3056	7.41234	5.34881	2.14858	2.9606	1.76491	0.07975	0	0	0	0	0	0	0
408	ClCC(Cl)(Cl)Cl	1,1,1,2-TETRACHLOROETHANE	149.565	0	0	0	0	0	0	0	0	0	0	0	0	0	0.197732	2.94802	3.29399	1.84067	3.59988	2.41001	3.70898	8.14871	2.93055	3.61713	12.9349	10.9193	5.8346	12.4175	20.5051	28.0307	14.9783	9.65465	1.27859	0	0	0	0	0	0	0	0	0	0	0	0	0	0
409	ClC(Cl)C(Cl)(Cl)Cl	PENTACHLOROETHANE	169.904	0	0	0	0	0	0	0	0	0	0	0	0.037616	1.35581	1.77021	0.398809	2.02974	0.59	0.269773	1.9971	5.01014	8.6411	3.49936	8.852	16.2768	6.77946	5.99328	22.8008	28.5515	33.8065	14.5923	0.037872	0	0	0	0	0	0	0	0	0	0	0	0	0	0	0
410	Cc1nccs1	METHYL-2-THIAZOLE	119.635	0	0	0	0	0	0	0	0	0	0	0	0	0	0	0	0.71165	2.07724	3.62303	6.28738	7.63974	8.49874	8.22349	7.10955	8.1949	13.2074	10.5338	6.73561	8.5879	8.08691	7.66431	6.40151	3.06855	1.58302	2.6716	0.583575	1.56783	1.84065	0.729301	1.1902	0.964499	1.01409	0.696316	0.153506	0	0	0
411	N#CCCOCCC#N	BIS(CYANOETHYL)ETHER	167.488	0	0	0	0	0	0	0	0	0	0	0	0	0	0	0	2.9703	10.1996	9.10182	14.8229	19.3996	15.0143	10.2597	8.26301	6.55605	3.45643	3.1249	5.81105	5.79765	2.27548	2.93468	3.98149	5.55589	7.09242	8.73478	10.3905	11.5765	8.36476	4.81252	0.322325	0	0	0	0	0	0	0
412	O=C1CCCO1	GAMMA-BUTYROLACTONE	104.404	0	0	0	0	0	0	0	0	0	0	0	0	0	0	0	0	0	1.19445	7.3857	14.4012	16.9275	12.2377	8.85339	8.5953	6.17981	2.39255	1.80641	1.66884	2.16837	2.05279	0.661834	2.36743	2.25431	3.07929	3.67107	5.70125	6.82739	3.85774	2.64292	0.458978	0	0	0	0	0	0
413	CCOC(=O)CI	ETHYLIODOACETATE	159.19	0	0	0	0	0	0	0	0	0	0	0	0	0	0	0.081863	2.32872	4.09918	3.45696	2.53493	10.3395	14.0883	12.7591	12.118	14.4433	10.1458	9.08524	4.72203	8.98234	10.906	10.5754	14.2542	1.77773	4.05205	3.40344	1.70223	3.86282	4.78996	1.68481	0.201589	0	0	0	0	0	0	0
414	CCCC[C@@H](C)CC	3-METHYLHEPTANE	189.392	0	0	0	0	0	0	0	0	0	0	0	0	0	0	0	0	0	0	0	0	0	1.7952	16.0202	29.4062	39.5585	27.5083	27.7666	28.0275	18.9042	1.87217	0	0	0	0	0	0	0	0	0	0	0	0	0	0	0	0
415	COCCOCCOCCOC	TRIETHYLENE_GLYCOL_DIMETHYL_ETHER	236.372	0	0	0	0	0	0	0	0	0	0	0	0	0	0	0	0	0	0	0.070534	2.8401	16.9715	48.2199	36.0929	25.4865	27.8315	21.5107	9.36181	4.47176	4.19905	6.48867	2.76423	2.2972	2.82049	3.71454	10.9096	7.24529	2.71873	7.81208	3.70464	0.233062	0	0	0	0	0	0
416	Cc1ccccc1N	O-TOLUIDINE	146.897	0	0	0	0	0	0	0	0	0	0	0	0.176319	1.00694	2.15185	2.54234	1.82458	2.71018	2.93724	2.64723	6.08571	12.5012	12.3954	11.442	8.97067	7.746	9.07986	8.18611	7.87656	5.54165	7.18341	7.1246	9.194	8.44736	5.72783	4.20001	0.772441	0.608039	0.37796	0.809552	0.48074	0.901954	0.411179	0	0	0	0
417	Ic1sc(I)c(I)c1I	TETRAIODOTHIOPHENE	259.238	0	0	0	0	0	0	0	0	0	0	0	0	0	0	0.700509	1.49859	4.44759	8.44774	2.90885	0.202245	6.47497	15.7092	12.401	6.13292	6.59144	25.7023	50.7424	37.259	38.6067	15.3875	0	0	0	0	0	0	0	0	0	0	0	0	0	0	0	0
418	CCCCCCCC/C=C\CCCCCCCC(=O)OC	METHYL_OLEATE	439.329	0	0	0	0	0	0	0	0	0	0	0	0	0	0	0	0	0	0	1.01566	7.69083	10.4873	15.1165	37.0395	74.602	78.3243	61.4477	39.9538	35.2466	21.0356	5.36632	5.43628	5.40216	5.68817	4.80049	4.10265	2.55757	5.74622	2.6403	0.671254	0	0	0	0	0	0	0
419	C[C@H]1O[C@@H](C)O[C@@H](C)O1	PARALDEHYDE	163.959	0	0	0	0	0	0	0	0	0	0	0	0	0	0	0	0	0	0	0.0354	11.4372	21.866	21.1972	16.7206	12.7343	12.4643	21.6306	11.1936	3.01955	2.18427	3.83198	1.70068	1.03874	2.1597	3.9749	6.23109	6.72529	3.37792	5.95403	1.28282	0	0	0	0	0	0	0
420	C[C@H]1CCCS1	2-METHYLTHIACYCLOPENTANE	137.583	0	0	0	0	0	0	0	0	0	0	0	0	0	0	0	0	0	0	0	0.978528	5.95982	17.9457	20.7084	18.0113	16.319	15.4636	12.0353	5.26358	3.71972	3.32265	2.18832	4.21851	3.82482	1.69894	1.63809	1.89578	3.36118	1.09237	0.927196	0	0	0	0	0	0	0
421	C[C@H]1CCSC1	3-METHYLTHIACYCLOPENTANE	138.608	0	0	0	0	0	0	0	0	0	0	0	0	0	0	0	0	0	0	0	1.41649	6.57262	15.4632	22.2049	20.1604	15.4455	15.3755	10.4572	6.46389	3.64593	3.24076	1.97703	5.3212	3.82382	1.50721	1.20627	2.3234	3.69916	0.892603	0.753813	0	0	0	0	0	0	0
422	C1CCSCC1	THIACYCLOHEXANE	135.648	0	0	0	0	0	0	0	0	0	0	0	0	0	0	0	0	0	0	0.300223	3.34448	5.92348	10.0582	19.623	20.82	19.1192	16.7856	10.1166	5.33036	4.44354	1.82438	2.06058	4.05219	3.71279	1.96031	1.59902	2.13956	2.85422	1.37763	0.594953	0	0	0	0	0	0	0
423	CC[C@H](C)CS	2-METHYL-1-BUTANETHIOL	152.954	0	0	0	0	0	0	0	0	0	0	0	0	0	0	0	0.099496	1.4184	1.4232	1.23861	2.4575	4.0629	9.13933	22.6198	21.0327	17.175	15.5335	14.9	15.9474	6.10399	3.7776	4.10018	1.65644	2.62026	2.99128	1.84367	2.3562	2.06708	1.1449	0	0	0	0	0	0	0	0
424	CCCCCCCCCCCCCCCCCCC	N-NONADECANE	430.235	0	0	0	0	0	0	0	0	0	0	0	0	0	0	0	0	0	0	0	0	0	0.910177	20.1489	67.3725	98.8772	75.6646	68.3575	39.8249	41.4203	3.55664	0	0	0	0	0	0	0	0	0	0	0	0	0	0	0	0
425	CCC(C)(C)S	2-METHYL-2-BUTANETHIOL	152.901	0	0	0	0	0	0	0	0	0	0	0	0	0	0	0	0	0.575755	1.03527	1.20539	1.66122	3.67168	15.5137	20.6914	18.1384	13.0284	14.5709	20.1003	13.9506	5.11556	2.97329	2.35181	2.68285	3.3579	2.97064	2.22058	1.32435	1.96162	1.28639	0.007346	0	0	0	0	0	0	0
426	CC(C)[C@@H](C)S	3-METHYL-2-BUTANETHIOL	153.147	0	0	0	0	0	0	0	0	0	0	0	0	0	0	0	0	0.833519	0.962375	1.5397	3.22004	4.08257	12.5647	18.7578	19.3853	16.5897	14.0809	13.8456	18.2112	6.51797	3.94582	2.11509	1.71456	3.08677	3.1032	2.85807	1.11127	1.94949	1.11364	0	0	0	0	0	0	0	0
427	C[C@@H](O)C(=O)O	LACTIC_ACID	107.947	0	0	0	0	0	0	0.187545	1.39922	0.573355	2.03484	3.01173	1.12009	1.03079	1.78171	1.31588	1.91141	1.5721	1.81794	1.95076	6.86803	7.46894	5.60475	7.7176	7.07252	5.20647	7.08271	4.09661	5.24539	3.35001	4.18716	2.19888	1.71076	6.17795	4.41994	4.97316	8.66319	5.29252	2.97483	1.28105	0.093885	0	0	0	0	0	0
428	C#CCCCCCCC	1-NONYNE	202.261	0	0	0	0	0	0	0	0	0	0	0	0	0.025685	0.582775	1.39003	1.84946	1.11784	0.305515	1.37052	3.64319	5.04598	6.07775	20.5745	32.9589	31.9299	21.8496	19.5847	19.1078	12.3273	3.67466	2.25488	6.06863	4.69033	8.80298	3.30903	0	0	0	0	0	0	0	0	0	0	0
429	COC(=O)C(=O)OC	DIMETHYL-OXALATE	134.633	0	0	0	0	0	0	0	0	0	0	0	0	0	0	0	0	0.048211	4.71251	14.7657	13.2302	13.0154	14.8466	14.1343	8.33014	4.44035	3.98612	3.94594	2.47589	3.3648	3.5632	3.74901	4.06479	4.33226	5.45426	10.073	8.9662	4.05512	2.47623	0.244537	0	0	0	0	0	0	0
430	C=CCSCC=C	DIALLYL_SULFIDE	163.784	0	0	0	0	0	0	0	0	0	0	0	0	0	0	0	0	0	0	4.0527	15.5877	19.2185	13.6532	14.8081	12.6828	7.74966	7.71604	9.86506	13.4103	10.1456	6.65491	9.40055	9.31994	5.70471	6.43223	2.94398	1.72068	1.36865	0.188503	0	0	0	0	0	0	0	0
431	CC[C@@H](C)C(C)=O	3-METHYL-2-PENTANONE	151.085	0	0	0	0	0	0	0	0	0	0	0	0	0	0	0	0	0	0.066027	1.38098	5.04131	8.5931	16.5107	19.2285	21.09	17.5631	17.0363	11.9078	11.3293	2.93715	1.72458	1.04702	0.730968	0.875834	1.35146	2.11147	1.65955	4.1402	3.99774	2.22643	1.71602	0.319852	0	0	0	0	0
432	CC(=O)C(C)(C)C	3,3-DIMETHYL-2-BUTANONE	151.147	0	0	0	0	0	0	0	0	0	0	0	0	0	0	0	0	0	0.018246	1.80252	4.35679	9.37899	18.1014	18.8184	16.5682	16.0783	13.1331	16.1226	11.7748	2.45017	1.71984	0.964857	1.05838	0.694509	1.66873	2.12147	1.11414	4.57843	3.90106	2.11514	1.3905	0.197426	0	0	0	0	0
433	CC(C)C(=O)C(C)C	DIISOPROPYL_KETONE	172.919	0	0	0	0	0	0	0	0	0	0	0	0	0	0	0	0	0	0	0	0.90957	10.1752	18.4507	23.5508	23.6226	17.8277	16.5782	18.5458	14.7777	3.54439	0.776572	0.342053	0.955131	0.968656	1.4998	1.76672	1.23876	3.66461	5.5608	2.61761	0.358281	0	0	0	0	0	0
434	CC[C@H](C)CO	2-METHYL-1-BUTANOL	135.164	0	0	0	0	0	0	0	0	0	0.069339	0.373812	1.21226	0.648313	0.236035	0.751394	0.905134	1.05859	1.12517	0.346185	1.10312	2.29691	9.17519	18.4549	22.3311	16.7513	13.5694	15.3669	14.4173	4.59161	1.62923	0.838784	1.07779	1.02445	0.975032	1.08576	1.09553	1.26369	1.84255	1.78058	2.40806	1.90754	0.565184	0	0	0	0
435	CC(C)(C)CO	2,2-DIMETHYL-1-PROPANOL	135.695	0	0	0	0	0	0	0	0	0	0.023024	0.541526	0.782118	0.806389	0.48105	0.961073	0.554301	0.887286	0.879123	0.677714	0.829153	2.11267	9.79882	22.1334	19.4235	13.0932	11.3571	10.4853	16.3657	8.75373	1.91546	1.66815	1.29499	0.678036	0.706975	0.932148	1.66341	1.16968	1.09584	2.13557	2.04602	1.51182	0.431336	0	0	0	0
436	CCC[C@H](C)O	2-PENTANOL	135.063	0	0	0	0	0	0	0	0	0	0	0.231168	1.02025	0.66284	0.354476	0.528203	1.09634	0.991411	0.866666	0.593091	0.957779	1.68635	9.02997	20.8258	22.5642	18.2103	13.6401	13.847	15.9116	5.32968	1.70592	0.692078	0.5978	1.35429	0.479505	1.09692	0.351938	1.66598	2.50336	0.91275	1.74304	2.44687	1.00433	0	0	0	0
437	CCC(O)CC	3-PENTANOL	134.696	0	0	0	0	0	0	0	0	0	0	0.30524	0.741341	0.979268	0.229691	0.243095	1.19343	1.11586	0.959228	0.349624	1.02694	1.31495	8.24105	19.5299	22.7589	17.8841	13.8166	14.4508	15.2996	7.34585	1.90914	1.2439	0.545068	1.00357	0.483352	1.14352	0.561291	1.44207	2.50447	2.05375	1.48084	1.04561	0.574116	0	0	0	0
438	CC(C)[C@@H](C)O	3-METHYL-2-BUTANOL	135.757	0	0	0	0	0	0	0	0	0	0.055203	0.396237	1.3103	0.750599	0.361823	0.779589	1.44554	0.897332	0.48006	0.636282	1.65124	1.04538	5.67257	17.9532	18.8533	18.8293	13.9658	14.2142	15.0651	10.3948	2.56292	1.47014	1.25656	1.08067	0.19656	1.03648	0.9096	1.34874	2.12065	2.5099	1.48306	0.138012	0	0	0	0	0
439	CCC(C)(C)O	2-METHYL-2-BUTANOL	135.992	0	0	0	0	0	0	0	0	0	0.023866	0.558987	0.773985	0.801677	0.639107	0.358616	1.49513	0.787545	0.394411	0.760949	1.14422	2.8489	10.6165	16.9427	18.8953	13.43	12.8323	15.2623	18.0884	7.95437	1.61211	1.38385	0.356229	0.921281	0.602848	0.544037	1.22616	0.938795	2.04826	1.36544	0.879297	2.12427	1.0623	0.042951	0	0	0
440	CC(C)C(C)(C)S	2,3-DIMETHYL-2-BUTANETHIOL	173.159	0	0	0	0	0	0	0	0	0	0	0	0	0	0	0	0	0.655345	1.06404	1.51538	1.16656	4.37722	14.4264	22.3681	20.3462	16.8307	15.0901	19.2012	18.1006	6.90337	3.54117	1.94727	2.46293	3.52366	2.69671	2.48878	1.14298	1.95719	1.32132	0	0	0	0	0	0	0	0
441	CC(C)SC(C)C	2,4-DIMETHYL-3-THIAPENTANE	174.096	0	0	0	0	0	0	0	0	0	0	0	0	0	0	0	0	0	0	0	0.866855	7.25648	17.7691	22.5439	24.1513	18.0946	16.3997	25.075	14.006	3.12037	2.35069	2.78661	2.97937	1.98436	4.14398	2.62266	1.78687	1.29595	2.07207	0.914188	0	0	0	0	0	0	0
442	CCCC(C)(C)S	2-METHYL-2-PENTANETHIOL	174.909	0	0	0	0	0	0	0	0	0	0	0	0	0	0	0	0	0.493051	1.37036	1.16515	1.59497	4.32101	13.2816	21.9027	21.1801	18.6294	16.3847	22.2799	19.921	7.62714	3.62383	2.68109	2.33125	2.66888	3.05298	2.65735	1.67824	0.954389	0.749638	0.007542	0	0	0	0	0	0	0
443	CCOP(=O)(CC)OCC	DIETHYLETHYLPHOSPHONATE	212.863	0	0	0	0	0	0	0	0	0	0	0	0	0	0	0	0	0	0.212827	2.50478	5.83665	17.9653	24.2073	28.9316	25.4083	19.6989	20.9916	20.9398	6.67623	3.47635	3.21426	1.93495	3.04443	3.1168	3.38225	3.28006	3.39017	4.56471	0.920894	1.28638	6.0148	2.27283	0	0	0	0	0
444	C=CP(C=C)C=C	TRIVINYLPHOSPHINE	161.344	0	0	0	0	0	0	0	0	0	0	0	0	0	0	0	0	0	0.258223	6.45728	11.6134	14.114	11.8894	10.2464	11.8465	11.5907	11.5427	13.5899	10.7943	9.92185	8.03225	8.29235	6.8553	5.12544	5.06074	2.23324	0.038738	0.372073	1.30736	0.251895	0	0	0	0	0	0	0
445	CCC(C)(O)CC	3-METHYL-3-PENTANOL	156.67	0	0	0	0	0	0	0	0	0	0	0.348631	1.02683	0.461043	0.772787	0.835714	0.923103	0.96824	0.408624	0.457386	1.23517	1.85546	9.37119	19.7395	20.1904	17.7613	16.1271	18.7567	19.7814	10.0672	2.04856	1.44071	0.753557	0.622455	1.05083	0.579989	1.19337	0.936601	1.25081	1.35108	1.03404	1.77985	0.833872	0	0	0	0
446	CCCP(=O)(OCC)OCC	DIETHYLPROPYLPHOSPHONATE	235.353	0	0	0	0	0	0	0	0	0	0	0	0	0	0	0	0	0	0.252421	2.74179	6.20734	18.3004	28.825	33.5865	29.2043	17.8989	21.815	18.5264	11.3198	2.49077	1.79029	2.36432	3.4539	3.17986	2.27271	2.70466	2.65666	5.35192	1.14118	2.94823	5.98781	3.8674	0.432987	0	0	0	0
447	CC(C)OP(C)(=O)OC(C)C	DIISOPROPYLMETHYLPHOSPHATE	238.213	0	0	0	0	0	0	0	0	0	0	0	0	0	0	0	0	0	1.31736	4.40192	5.47324	15.3737	25.201	29.4169	22.5496	21.9799	20.2803	26.9255	9.28867	4.43574	3.16679	3.2539	2.10193	4.77504	3.09263	4.45818	1.78217	4.4965	1.01123	0.967259	4.94167	2.67951	0.275331	0	0	0	0
448	CCCC[C@H](C)O	2-HEXANOL	157.664	0	0	0	0	0	0	0	0	0	0.181826	0.506497	1.56746	0.447203	0.732097	0.498432	1.21531	1.03229	0.545734	0.789435	1.0704	2.12966	6.73444	18.2672	24.6554	24.9776	17.1899	18.5441	16.9003	10.7887	2.11734	1.2531	0.922607	1.07848	0.767071	1.16903	0.398591	1.18266	2.54627	1.99054	1.61322	1.1303	0.647061	0	0	0	0
449	CSc1ccccc1	METHYL_PHENYL_SULFIDE	162.347	0	0	0	0	0	0	0	0	0	0	0	0	0	0	0	0	0	0.384671	6.59586	13.7413	14.52	12.3674	10.3312	11.1382	11.2557	11.4698	6.95741	11.664	9.23416	12.506	12.739	10.4958	2.79397	1.82194	1.58167	2.31021	0.89802	0	0	0	0	0	0	0	0	0
450	ClCCCCl	1,3-DICHLOROPROPANE	127.073	0	0	0	0	0	0	0	0	0	0	0	0	0	0	0	0	0.136902	6.10961	12.6955	9.53211	11.766	7.32443	6.30051	4.64031	7.64989	2.57015	4.53093	10.7788	6.53545	2.37125	16.8446	16.0787	12.132	0	0	0	0	0	0	0	0	0	0	0	0	0
451	COc1ccccc1[N+](=O)[O-]	O-NITROANISOLE	173.946	0	0	0	0	0	0	0	0	0	0	0	0	0	0	0	0.070332	0.96341	6.98824	15.8222	13.6077	10.4917	10.0447	10.8813	10.8779	9.22868	10.2621	10.8688	8.66177	10.9261	8.56142	2.93532	4.04703	8.33133	7.25654	7.14225	3.50307	2.2526	2.5352	0.599928	0	0	0	0	0	0	0
452	O=C(c1ccccc1)c1ccccc1	BENZOPHENONE	229.122	0	0	0	0	0	0	0	0	0	0	0	0	0	0	0	0	0	0.991692	14.6358	20.0826	19.1658	12.9635	12.3784	12.8685	12.7349	12.9243	14.8767	12.8996	15.2113	21.4601	17.3573	4.00481	0.651357	2.34288	0.901344	3.1257	4.14753	3.408	1.4566	0.030807	0	0	0	0	0	0
453	c1ccc(Nc2ccccc2)cc1	DIPHENYLAMINE	217.762	0	0	0	0	0	0	0	0	0	0.324579	1.05966	1.23826	0.662658	1.00717	0.609804	2.01336	2.63049	3.12645	6.33977	15.189	17.8859	14.5202	11.1291	8.50286	11.3301	10.4648	9.59724	7.94292	19.9895	18.0316	13.709	17.7899	15.2355	4.50623	0	0	0	0	0	0	0	0	0	0	0	0
454	Cc1ccccc1Cl	O-CHLOROTOLUENE	153.449	0	0	0	0	0	0	0	0	0	0	0	0	0	0	0	0	0	0.477307	5.37122	9.04823	12.0771	11.8727	10.6245	10.2737	6.91181	14.7495	10.7088	12.1931	14.466	17.0827	14.8679	6.4888	0.169085	0	0	0	0	0	0	0	0	0	0	0	0	0
455	CCOC(=O)c1ccccc1	ETHYL_BENZOATE	190.865	0	0	0	0	0	0	0	0	0	0	0	0	0	0	0	0	0	0	2.70607	9.95489	18.0914	18.2729	16.4277	16.6539	14.588	16.217	16.5593	14.4565	15.9164	12.5465	4.02394	1.95054	1.66608	1.2269	3.31898	1.5293	5.66662	2.55495	0.176175	0	0	0	0	0	0	0
456	CCCOC[C@@H](C)O	PROPYLENE_GLYCOL_N-PROPYL_ETHER	168.784	0	0	0	0	0	0	0	0	0	0	0	0	0	0	0.650248	0.761341	0.43836	0.39102	0.767065	1.24426	3.30348	17.5724	31.4796	25.7759	21.954	17.3288	17.7243	11.2948	3.0846	2.4072	1.5534	2.25327	1.2575	1.37056	1.85915	3.64996	1.91769	2.22512	2.10773	2.60889	1.26382	0.1166	0	0	0	0
457	C=C(C)C(N)=O	2-METHACRYLAMIDE	116.789	0	0	0	0	0	0	0	0	0	0	0.849707	2.31521	1.76308	2.7971	2.68884	1.7323	1.47386	1.90172	2.72202	5.29276	8.44694	7.4047	8.20886	7.62484	7.84511	8.17072	10.4769	9.14856	4.72598	4.35217	3.69643	2.05167	2.2502	1.85782	1.69033	2.24449	1.94549	3.47758	5.44007	2.9097	0.747678	0	0	0	0	0
458	CC(C)CC(=O)O	ISOVALERIC_ACID	140.308	0	0	0	0	0	0	0	0.451759	1.27489	0.178858	1.44546	1.30996	0.746158	0.236802	0.280064	0.453374	1.17508	0.781945	2.16505	3.33023	4.12772	6.71515	15.8612	19.6028	16.57	11.0656	11.4924	14.0359	4.80405	3.0259	3.28644	2.08585	1.10286	5.08313	3.27211	3.98123	5.1917	1.97155	0.05146	0	0	0	0	0	0	0
459	CCOC(=O)CC(C)=O	ETHYL_ACETOACETATE	168.386	0	0	0	0	0	0	0	0	0	0	0	0	0	0	0	0.054154	2.37971	6.93758	9.43418	9.53974	17.2697	17.6427	15.6838	14.6604	11.9221	11.7899	7.10324	2.52966	2.32735	2.0162	2.78526	3.12295	4.92045	5.39059	7.2118	7.19891	8.38331	4.2662	1.91907	0.081273	0	0	0	0	0	0
460	CCCC(=O)OC	METHYL_N-BUTYRATE	140.181	0	0	0	0	0	0	0	0	0	0	0	0	0	0	0	0	0	0.105807	2.61344	8.59969	8.98497	13.2086	19.7567	21.2644	15.7597	10.5927	10.3029	9.45064	3.41263	2.84116	2.01689	2.61598	3.13693	1.79283	3.93664	1.86553	4.0967	4.54313	1.265	0.044465	0	0	0	0	0	0
461	CCCCCCCCCCCCCCCCO	1-HEXADECANOL	375.76	0	0	0	0	0	0	0	0	0	0.03769	0.534566	0.747512	0.722991	0.654561	0.7367	0.647938	0.864233	0.839631	0.628726	0.866122	2.49404	7.24658	25.3311	62.6765	75.5286	60.0101	49.0031	28.3643	28.438	3.27361	1.65527	1.14551	0.383985	0.857538	1.09771	1.42231	1.18447	1.48305	2.10359	2.47073	1.7733	0.741533	0	0	0	0
462	CCCCCCCCCCCCCCCCCCO	1-OCTADECANOL	420.543	0	0	0	0	0	0	0	0	0	0.269282	0.706201	1.48578	0.090322	0.869986	0.924438	1.26666	0.652826	0.589644	0.696686	1.32149	2.12461	6.10973	25.395	66.81	88.0989	67.8544	56.7965	33.42	32.1857	3.54013	1.05211	1.28836	0.817563	1.03604	1.13211	0.893212	1.13183	2.00751	1.71358	2.43616	1.96587	0.83619	0	0	0	0
463	CCCCCCCCCCC	N-UNDECANE	255.394	0	0	0	0	0	0	0	0	0	0	0	0	0	0	0	0	0	0	0	0	0	0.927322	15.2449	41.2634	58.6733	43.5558	41.0632	27.1597	27.2669	1.57863	0	0	0	0	0	0	0	0	0	0	0	0	0	0	0	0
464	CCCCCCC(C)C	2-METHYLOCTANE	211.96	0	0	0	0	0	0	0	0	0	0	0	0	0	0	0	0	0	0	0	0	0	1.1311	16.624	33.7077	46.8004	32.2735	30.8986	25.2974	23.5527	2.57577	0	0	0	0	0	0	0	0	0	0	0	0	0	0	0	0
465	CC(C)C(C)C(C)C	2,3,4-TRIMETHYLPENTANE	188.143	0	0	0	0	0	0	0	0	0	0	0	0	0	0	0	0	0	0	0	0	0	3.06325	19.8974	24.4441	34.7065	22.7063	22.6429	23.4028	22.3399	3.3632	0	0	0	0	0	0	0	0	0	0	0	0	0	0	0	0
466	CCCCCCCCCCCCCCC	N-PENTADECANE	342.779	0	0	0	0	0	0	0	0	0	0	0	0	0	0	0	0	0	0	0	0	0	0.941572	17.5121	55.0851	77.7443	59.8166	55.0659	34.0742	33.8542	2.59974	0	0	0	0	0	0	0	0	0	0	0	0	0	0	0	0
467	C[C@H]1COC(=O)O1	PROPYLENE_CARBONATE	116.482	0	0	0	0	0	0	0	0	0	0	0	0	0	0	0	0	0.898618	6.33688	12.3486	13.1795	11.2647	10.2865	6.44858	6.54756	6.20565	5.10168	2.6473	3.48378	3.98184	1.78721	3.13515	4.47354	3.43267	7.89401	3.82849	7.64831	4.85794	2.78823	0.194387	0	0	0	0	0	0	0
468	CCCCCCCCc1ccccc1	N-OCTYLBENZENE	283.779	0	0	0	0	0	0	0	0	0	0	0	0	0	0	0	0	0	0	0.383752	6.44799	9.42709	14.6596	24.7211	39.9136	42.4822	33.1751	29.8394	20.5432	20.8832	6.69028	6.92036	9.48932	7.82022	3.71107	0.10737	0	0	0	0	0	0	0	0	0	0	0
469	CCCCc1cccc2ccccc12	1-N-BUTYLNAPHTHALENE	252.195	0	0	0	0	0	0	0	0	0	0	0	0	0	0	0	0	0	0	1.94723	12.2347	14.3878	19.4463	25.37	24.573	21.0485	18.251	17.7835	18.7475	12.4696	12.432	19.2664	16.6285	5.72409	0	0	0	0	0	0	0	0	0	0	0	0	0
470	CCc1cccc2ccccc12	1-ETHYLNAPHTHALENE	209.035	0	0	0	0	0	0	0	0	0	0	0	0	0	0	0	0	0	0	2.51509	13.1777	16.2165	20.2463	16.6738	16.6308	12.4605	13.9337	13.1205	12.8004	10.5429	12.0612	20.1759	15.7365	5.24675	0	0	0	0	0	0	0	0	0	0	0	0	0
471	OCCCCCCO	1,6-HEXANEDIOL	169.408	0	0	0	0	0	0	0	0	0	0.517799	1.26	3.55772	0.320391	1.34983	1.87465	2.21993	1.63359	1.15934	1.4749	2.20341	4.85903	12.0565	24.4871	27.3746	22.0167	16.0446	8.41712	8.39804	2.16945	2.74818	3.19969	2.13838	1.45189	1.86705	1.98973	2.59474	2.4451	2.95614	4.72253	4.44813	3.64162	1.53122	0	0	0	0
472	ClCCSCCCl	BIS(2-CHLOROETHYL)SULFIDE	177.82	0	0	0	0	0	0	0	0	0	0	0	0	0	0	0	0	1.03497	7.74743	13.0894	13.815	14.8312	12.0532	9.27182	7.05299	7.85795	3.30527	10.0526	12.3633	7.73386	9.27342	21.7446	16.1293	8.86057	1.71082	2.83102	1.02361	0.700415	0	0	0	0	0	0	0	0	0
473	O=C(O)C(Cl)Cl	DICHLOROACETIC_ACID	120.49	0	0	0	0	0	0.823148	1.02185	0.624044	2.02968	1.01845	0.253361	0.143317	1.30249	4.4624	0.794598	1.57393	2.07761	1.43673	0.951476	2.0369	4.06677	6.38522	3.73182	6.23757	8.13315	3.66291	6.90537	17.3	16.1927	12.4005	4.7213	4.85982	2.47958	3.10009	5.69116	3.15106	0.755685	0	0	0	0	0	0	0	0	0
474	C#CCCCCCC	1-OCTYNE	179.835	0	0	0	0	0	0	0	0	0	0	0	0	0.032473	0.575987	1.33287	1.82383	1.20063	0.236693	1.44738	3.57033	5.11076	6.38359	20.0303	29.4727	26.6505	17.6112	16.3694	17.9871	10.1951	2.91564	2.72905	6.04413	4.62389	8.77193	3.39167	0	0	0	0	0	0	0	0	0	0	0
475	CCCC[C@H](CC)C(=O)O	2-ETHYL_HEXANOIC_ACID	205.303	0	0	0	0	0	0	0	0.421091	1.28645	0.139293	1.50799	1.26904	0.778754	0.242662	0.287962	0.413075	1.19386	0.706591	0.418267	0.568658	1.8128	9.53587	21.8407	31.0383	31.8322	23.6707	20.6793	18.628	6.05083	1.88716	4.29294	1.9909	2.20795	4.51908	2.89052	3.57919	5.31082	2.39896	0.107839	0	0	0	0	0	0	0
476	CCC(CC)C(=O)O	2-ETHYL_BUTYRIC_ACID	162.708	0	0	0	0	0	0	0	0.791706	0.974784	0.31831	1.52558	1.33418	0.550042	0.172697	0.314554	0.667351	0.973714	0.707982	0.366776	0.626687	3.19336	14.4997	17.8114	23.5685	17.3547	16.3109	15.6538	13.4577	4.00977	1.88794	3.83896	1.81812	2.06222	4.12094	3.53369	2.64727	5.57187	3.22256	0.630725	0	0	0	0	0	0	0
477	O=C(O)c1ccccc1O	SALICYLIC_ACID	153.763	0	0	0	0	0	0	0.632683	1.07313	0.567561	1.31365	1.25634	0.538724	0.191632	0.339052	1.11589	0.759966	0.496991	0.927569	6.09397	9.02734	8.04057	6.63574	8.28663	10.8277	8.06588	10.272	14.6606	13.2691	13.0368	12.9978	5.61185	4.38123	5.61337	2.38049	5.42318	3.88778	1.0526	0	0	0	0	0	0	0	0	0
478	CCCCSCCCC	DI-N-BUTYL_SULFIDE	218.644	0	0	0	0	0	0	0	0	0	0	0	0	0	0	0	0	0	0	0	0.036622	4.24416	12.3612	34.9091	35.2412	34.526	25.3783	20.6742	21.7328	7.75667	2.99362	3.49385	3.0284	5.22076	1.31497	1.52448	1.90925	3.03757	1.35362	0.922217	0	0	0	0	0	0	0
479	N#CCc1ccccc1Br	ALPHA-BROMOBENZYLCYANIDE	185.671	0	0	0	0	0	0	0	0	0	0	0	0	0	0	1.31171	4.2777	2.85315	5.22661	11.1896	12.1355	10.1395	7.45207	8.54944	7.35747	10.0821	7.79534	15.9039	16.3321	15.1458	19.334	6.86752	1.75816	2.62717	3.73283	4.63297	3.92814	3.52928	1.85299	0.053649	0	0	0	0	0	0	0
480	CC(=O)OC(C)OC(C)=O	ETHYLIDENE_DIACETATE	179.952	0	0	0	0	0	0	0	0	0	0	0	0	0	0	0	0	0	3.14228	9.02272	15.9097	16.5569	15.2086	16.9683	23.8693	16.8413	7.25744	3.97798	4.4869	3.03051	4.4108	4.90396	4.9099	8.09517	6.2509	5.06092	8.43628	6.09215	3.20698	0.442236	0	0	0	0	0	0	0
481	CCCCCCC(=O)O	N-HEPTANOIC_ACID	183.52	0	0	0	0	0	0	0	0.411541	1.30915	0.133569	1.41388	1.28749	0.838222	0.236907	0.278848	0.370286	1.20866	0.761938	1.20999	5.05857	4.02713	5.65359	17.114	29.178	29.372	20.68	16.4895	14.7265	8.63603	2.5317	3.50243	2.53028	1.08305	5.19861	2.9914	4.36555	5.59422	2.29714	0.233607	0	0	0	0	0	0	0
482	CCOCc1ccccc1	BENZYL_ETHYL_ETHER	186.362	0	0	0	0	0	0	0	0	0	0	0	0	0	0	0	0	0	0	1.29037	8.22808	15.0908	24.1687	21.4063	17.8428	14.0455	11.515	14.4327	9.28715	9.52766	6.71038	12.6163	9.69429	8.19405	2.35809	0.831501	2.57177	1.19385	0.597141	0.060178	0	0	0	0	0	0	0
483	C=Cc1ccc(Br)cc1	P-BROMOVINYLBENZENE	176.765	0	0	0	0	0	0	0	0	0	0	0	0	0	0	0	0	0.513233	5.6971	11.0038	11.7311	11.5062	9.27201	6.02829	7.03999	10.0285	8.87427	12.2172	12.8207	24.1225	25.9213	15.7799	3.10619	2.37767	0.622618	0	0	0	0	0	0	0	0	0	0	0	0
484	Cc1ccc(Cl)cc1	P-CHLOROTOLUENE	154.77	0	0	0	0	0	0	0	0	0	0	0	0	0	0	0	0	0	1.52828	6.2132	7.87351	12.8296	10.6057	11.8982	8.87971	7.63889	13.1369	13.5026	10.2837	13.6796	20.7994	17.4003	3.91444	0	0	0	0	0	0	0	0	0	0	0	0	0	0
485	C=CCCCCCCCCCC	1-DODECENE	273.225	0	0	0	0	0	0	0	0	0	0	0	0	0	0	0	0	0	0	0	0.698169	4.28395	7.78397	23.0772	44.4009	51.6523	40.7534	36.2928	24.051	21.7474	4.79668	2.42599	3.20025	3.32333	2.00352	2.18403	0.0832	0	0	0	0	0	0	0	0	0	0
486	CCCCC=O	PENTANAL	129.897	0	0	0	0	0	0	0	0	0	0	0	0	0	0	0	0	0	0	0.971602	7.08273	9.6435	13.6964	20.0449	17.7061	14.7626	11.4094	10.8011	10.2383	3.22029	0.90299	1.17867	0.841738	2.3922	1.50158	2.06713	4.6781	3.94117	2.67133	2.13493	0.513163	0	0	0	0	0	0
487	CCCCCC=O	HEXANAL	151.959	0	0	0	0	0	0	0	0	0	0	0	0	0	0	0	0	0	0	0.986989	6.85432	9.87729	12.9433	20.8729	21.538	21.2037	14.5021	13.2649	11.9212	5.4008	1.04194	1.19142	1.27468	1.68818	1.57688	2.29439	4.57518	3.97346	2.7392	2.11412	0.501297	0	0	0	0	0	0
488	CCCCCCC=O	HEPTANAL	174.06	0	0	0	0	0	0	0	0	0	0	0	0	0	0	0	0	0	0	1.01781	6.82639	9.86186	12.582	21.4603	25.7888	25.6951	18.9825	15.9782	13.3531	7.70348	1.10994	1.19328	0.920965	2.24936	1.56132	2.06789	4.6494	3.95745	2.68462	2.11462	0.538427	0	0	0	0	0	0
489	CCCCCCCC=O	OCTANAL	196.029	0	0	0	0	0	0	0	0	0	0	0	0	0	0	0	0	0	0	0.902112	7.09923	9.91958	12.4607	21.1614	30.3765	30.1931	23.3715	18.7878	14.8579	9.87229	1.26195	1.31432	1.0164	1.5027	2.02891	2.04954	4.61839	4.01443	2.75313	2.1188	0.47174	0	0	0	0	0	0
490	CCCCCCCCC=O	NONANAL	217.852	0	0	0	0	0	0	0	0	0	0	0	0	0	0	0	0	0	0	0.855966	7.10336	10.0602	12.3327	21.8896	33.7322	34.9092	27.4429	22.2492	16.152	12.1552	1.25093	1.35912	0.988201	1.54422	2.02333	2.00621	4.64486	4.01801	2.73837	2.13612	0.47598	0	0	0	0	0	0
491	C1=Cc2ccccc2C1	INDENE	154.626	0	0	0	0	0	0	0	0	0	0	0	0	0	0	0	0	0	0	3.05096	13.9151	15.8217	13.8142	12.8266	10.7447	10.6028	7.0413	9.48518	5.7152	10.7307	8.40478	12.0507	12.4544	9.2098	2.55091	0	0	0	0	0	0	0	0	0	0	0	0
492	CCCCC(C)C	2-METHYLHEXANE	168.459	0	0	0	0	0	0	0	0	0	0	0	0	0	0	0	0	0	0	0	0	0	1.11423	15.6102	27.122	36.4439	24.4673	24.041	22.6251	19.8801	2.01174	0	0	0	0	0	0	0	0	0	0	0	0	0	0	0	0
493	CC[C@@H](C)CC(C)C	2,4-DIMETHYLHEXANE	189.937	0	0	0	0	0	0	0	0	0	0	0	0	0	0	0	0	0	0	0	0	0	1.82635	16.4381	28.9987	38.2928	26.2856	24.3973	26.2001	20.3551	2.37715	0	0	0	0	0	0	0	0	0	0	0	0	0	0	0	0
494	CC(C)(C)c1ccccc1	TERT-BUTYLBENZENE	196.447	0	0	0	0	0	0	0	0	0	0	0	0	0	0	0	0	0	0	0.658843	7.09929	11.2017	16.9953	21.1176	20.7043	14.5945	13.87	15.7625	19.8633	10.5431	8.11278	5.77105	8.43852	8.17278	3.70261	0.059842	0	0	0	0	0	0	0	0	0	0	0
495	Oc1ccccc1O	1,2-BENZENEDIOL	130.692	0	0	0	0	0	0.089051	0.659749	1.37743	0.521467	1.176	1.91856	1.7743	1.31693	0.7755	1.25795	1.95991	1.86961	1.85538	3.23425	8.71227	7.66079	6.3226	5.34073	4.54181	5.85219	5.67192	6.29176	7.57653	10.5795	9.49229	9.06951	11.3229	9.91885	4.1936	2.59342	2.28441	2.22759	0.033402	0	0	0	0	0	0	0	0
496	CC(C)c1ccccc1Br	O-ISOPROPYLBROMOBENZENE	205.097	0	0	0	0	0	0	0	0	0	0	0	0	0	0	0	0	0	0.656007	5.94979	8.427	10.2778	16.1695	13.1589	18.3329	13.3558	15.9746	14.2595	19.571	17.6708	19.2561	16.3888	5.7318	0.091498	0	0	0	0	0	0	0	0	0	0	0	0	0
497	Nc1cccc(N)c1	M-PHENYLENEDIAMINE	140.73	0	0	0	0	0	0	0	0	0	0	0.089408	2.10492	6.05299	2.66898	4.04961	4.38376	4.89136	5.39006	3.7592	6.38662	8.03484	6.3535	5.82801	4.74875	6.69758	3.89714	3.21665	4.45314	5.27564	7.3609	5.14735	4.89871	10.8195	15.7284	8.63456	6.48362	1.60931	0.06118	0	0	0	0	0	0	0	0
498	C1CCOCC1	OXACYCLOHEXANE	118.847	0	0	0	0	0	0	0	0	0	0	0	0	0	0	0	0	0	0	0	0	2.35944	8.01187	21.5854	25.259	20.5849	14.8936	11.5316	5.37776	1.34444	1.34352	1.04247	1.23993	1.25631	1.04942	0.633924	1.85393	1.23975	1.38609	2.19272	1.83963	0.452327	0	0	0	0	0
499	O=C(O)C(Cl)(Cl)Cl	TRICHLOROACETIC_ACID	140.986	0	0	0	0	0	0	0.145131	0.560575	0.750273	0.945691	0.344866	0.666467	0.161278	0.374504	0.41454	0.892361	0.796854	1.73711	3.33964	10.1421	4.18112	4.84096	11.9419	6.75647	3.60317	15.9989	21.759	21.2736	3.70861	3.3697	5.68501	4.14316	3.53972	6.07155	4.46297	1.72308	0.117574	0	0	0	0	0	0	0	0	0
500	CC(C)CCCC(C)C	2,6-DIMETHYLHEPTANE	212.905	0	0	0	0	0	0	0	0	0	0	0	0	0	0	0	0	0	0	0	0	0	1.28576	18.4828	32.6488	46.5316	28.402	28.5446	25.5348	24.4224	3.32889	0	0	0	0	0	0	0	0	0	0	0	0	0	0	0	0
501	N#CCCC#N	SUCCINONITRILE	111.946	0	0	0	0	0	0	0	0	0	0	0	0	0	0.008715	9.09489	13.7397	7.51904	4.35178	5.62833	6.70946	2.9395	1.27984	7.63029	2.12563	0.402132	2.93799	6.646	2.2517	1.74408	3.3301	2.1866	4.46807	5.30276	9.01759	10.6183	8.23672	6.69112	3.24027	0.001254	0	0	0	0	0	0	0
502	CC(C)CCCCC(C)C	2,7-DIMETHYLOCTANE	234.33	0	0	0	0	0	0	0	0	0	0	0	0	0	0	0	0	0	0	0	0	0	1.35967	19.3721	36.0876	50.6328	32.1483	31.4996	27.9468	26.1761	3.43937	0	0	0	0	0	0	0	0	0	0	0	0	0	0	0	0
503	CCC1CCCC1	ETHYLCYCLOPENTANE	153.8	0	0	0	0	0	0	0	0	0	0	0	0	0	0	0	0	0	0	0	0	0	0.434582	11.2083	25.0101	33.1811	27.6712	22.1505	19.2889	16.6158	0.846071	0	0	0	0	0	0	0	0	0	0	0	0	0	0	0	0
504	CC(C)C1CCCC1	ISOPROPYLCYCLOPENTANE	175.857	0	0	0	0	0	0	0	0	0	0	0	0	0	0	0	0	0	0	0	0	0	0.517931	13.3013	27.6121	37.039	28.0003	23.0211	20.4809	19.3178	1.93477	0	0	0	0	0	0	0	0	0	0	0	0	0	0	0	0
505	CCCCC1CCCC1	N-BUTYLCYCLOPENTANE	197.296	0	0	0	0	0	0	0	0	0	0	0	0	0	0	0	0	0	0	0	0	0	0.546879	12.2459	32.5917	42.1924	35.0464	29.2133	22.2969	20.9089	1.09473	0	0	0	0	0	0	0	0	0	0	0	0	0	0	0	0
506	CCCCCCC1CCCC1	N-HEXYLCYCLOPENTANE	242.027	0	0	0	0	0	0	0	0	0	0	0	0	0	0	0	0	0	0	0	0	0	0.536819	13.6196	38.3416	52.5951	43.8225	36.2164	24.9381	24.8011	1.38849	0	0	0	0	0	0	0	0	0	0	0	0	0	0	0	0
507	FC(F)(F)P(Cl)Cl	TRIFLUOROMETHYLDICHLOROPHOSPHINE	140.849	0	0	0	0	0	0	0	0	0	0	0	0	0	0	0	0	0	0.143828	2.71037	3.5218	4.58209	8.0249	6.43315	9.41791	9.24471	11.7372	38.1247	42.3905	7.28284	0	0	0	0	0	0	0	0	0	0	0	0	0	0	0	0	0
508	C=C(C)C(C)C	2,3-DIMETHYL-1-BUTENE	140.491	0	0	0	0	0	0	0	0	0	0	0	0	0	0	0	0	0	0	0	0.03074	3.17338	12.6791	19.4455	19.9493	15.6053	15.7027	16.3942	17.7493	7.6634	3.12884	4.09312	2.48285	2.80547	2.1193	1.59214	0.32272	0	0	0	0	0	0	0	0	0	0
509	CCCCCCCCC(=O)O	N-NONANOIC_ACID	227.064	0	0	0	0	0	0	0	0.400933	1.31333	0.110868	1.4264	1.289	0.855391	0.234924	0.279928	0.364854	1.1803	0.808148	1.85793	4.27465	4.06219	5.01744	15.572	35.3073	38.4509	28.7998	25.2404	20.029	11.1601	2.88355	3.10638	2.4556	1.50378	4.78756	3.43112	4.12094	5.26797	1.60992	0.068676	0	0	0	0	0	0	0
510	Clc1ccccc1Cl	O-DICHLOROBENZENE	154.067	0	0	0	0	0	0	0	0	0	0	0	0	0	0	0	0	0.675717	6.20219	8.47869	7.82806	7.17505	6.71039	7.43076	3.06127	8.63992	12.1322	15.0061	16.9437	25.631	22.25	9.01744	0.138728	0	0	0	0	0	0	0	0	0	0	0	0	0	0
511	Cc1cccc(N)c1	M-TOLUIDINE	147.34	0	0	0	0	0	0	0	0	0	0	0.121126	1.21906	3.01482	1.66135	2.10917	2.20257	2.66016	2.48409	2.28181	4.72046	9.27747	12.0682	12.0692	9.75943	7.83854	7.37381	11.3089	8.56972	5.59817	6.62706	6.07863	9.31837	11.2722	7.82465	5.23298	1.54401	0.238883	0	0	0	0	0	0	0	0	0
512	COc1ccccc1O	GUAIACOL	153.908	0	0	0	0	0	0	0	0.434868	0.897411	1.54346	0.062597	0.846423	0.947463	0.370857	1.70624	0.744073	0.704206	1.12551	4.03012	10.5994	13.8506	11.0512	10.2994	9.69333	9.3677	5.72744	7.77569	5.69584	10.5282	10.7682	8.4535	9.81389	8.36193	4.69389	2.88324	2.62366	1.68715	1.48286	0.083903	0	0	0	0	0	0	0
513	Oc1ccccc1Cl	O-CHLOROPHENOL	141.722	0	0	0	0	0	0	0	0	0	0.222784	0.399298	0.790583	0.581441	0.819799	0.5367	0.458345	0.18711	1.65815	5.12478	8.44638	9.42144	8.08843	6.84476	7.20837	9.71768	7.81226	12.7612	19.3372	15.6721	13.5383	8.6017	2.36236	0.971437	2.07722	2.23104	2.06082	0	0	0	0	0	0	0	0	0	0
514	Oc1cccc(Cl)c1	M-CHLOROPHENOL	143.642	0	0	0	0	0	0	0.512311	1.42977	0.734868	0.690467	1.09776	1.13417	0.777841	0.696983	0.85001	0.657771	1.85895	3.78162	8.2131	6.27501	5.57844	5.74386	5.69495	5.01838	4.51037	6.98616	8.39894	12.6287	17.837	21.6257	16.2163	3.35443	1.8069	0.966384	2.11698	2.64619	0.717648	0	0	0	0	0	0	0	0	0
515	Oc1ccc(Cl)cc1	P-CHLOROPHENOL	143.919	0	0	0	0	0	0	0.417441	1.43478	0.808676	0.690501	0.899912	1.27127	0.808072	0.82816	0.780608	0.68969	1.94035	4.58295	8.65695	6.38163	5.59321	4.94746	5.77256	4.44327	5.21466	5.21173	12.0892	8.39568	16.9947	21.6676	18.9344	2.74232	2.00513	0.729524	2.20118	2.4444	1.29729	0	0	0	0	0	0	0	0	0
516	CC(=O)CC(C)=O	ACETYLACETONE	135.49	0	0	0	0	0	0	0	0	0	0	0	0	0	0	0	0	0	1.44228	9.45736	13.2006	13.3742	13.9554	15.0965	13.1741	14.9865	4.96091	1.76724	1.8749	1.04132	1.04011	2.7626	2.38145	2.15862	4.79727	6.05165	7.1338	6.14758	4.23602	1.98807	0.02234	0	0	0	0	0	0
517	Oc1cccc(O)c1	1,3-BENZENEDIOL	132.076	0	0	0	0	0	0	0.602733	2.28785	2.06107	1.37759	1.37578	2.63849	1.63451	1.97819	1.62786	1.93532	2.45582	1.4562	3.13968	7.69003	7.25114	4.98954	4.4348	3.99615	5.31135	5.03748	6.23916	2.98313	9.20312	10.3172	12.5502	12.0907	8.40478	3.41352	3.20607	4.4667	4.82092	0.179104	0	0	0	0	0	0	0	0
518	FS(F)(F)F	SULFURTETRAFLUORIDE	82.4553	0	0	0	0	0	0	0	0	0	0	0	0	0	0.008233	1.56929	1.76709	3.76432	1.61638	3.38705	2.95047	1.27891	1.71733	1.031	3.50999	11.1698	15.6657	8.43665	5.55875	8.34804	17.1947	8.95201	0.056866	0	0	0	0	0	0	0	0	0	0	0	0	0	0
519	O=C(O)CC(=O)O	MALONIC_ACID	112.776	0	0	0	0	0	0	0.808377	2.70884	0.816827	2.51469	3.1905	1.03185	0.345107	0.61347	1.67066	3.81661	5.267	4.2041	3.61352	4.76945	5.12585	3.73611	5.14696	5.34023	3.11851	1.29149	2.01982	6.28296	5.46108	6.49614	2.18396	3.86438	11.1396	5.94565	7.78487	11.0249	4.21226	0.826877	0	0	0	0	0	0	0	0
520	COCC(C)C	METHYL_ISOBUTYL_ETHER	136.965	0	0	0	0	0	0	0	0	0	0	0	0	0	0	0	0	0	0	0	0.86233	1.83664	10.1305	23.2705	24.6601	21.3096	16.1881	11.5437	14.4347	7.55272	2.49928	1.33881	1.37356	0.856474	1.01477	0.625544	1.6966	3.27269	0.564993	0.987661	0.774728	0.054531	0	0	0	0	0
521	CC[C@H](C)OC	METHYL_SEC-BUTYL_ETHER	135.51	0	0	0	0	0	0	0	0	0	0	0	0	0	0	0	0	0	0	0	0.617639	3.43116	13.9852	20.3064	22.1903	19.5629	17.1187	13.9736	13.6396	4.47973	1.98554	0.934032	0.582755	1.32638	1.02187	0.478925	0.874977	2.18786	1.45471	1.34912	1.70627	0.923887	0	0	0	0	0
522	COC(C)(C)C	METHYL_TERT-BUTYL_ETHER	135.874	0	0	0	0	0	0	0	0	0	0	0	0	0	0	0	0	0	0	0	0.443478	3.71942	17.9076	18.7329	20.5091	15.0317	14.5358	12.9044	16.9281	4.57813	1.75849	1.36173	0.447459	0.465032	1.80855	0.551494	0.69119	1.06693	2.09106	1.22252	1.60582	1.3001	0.008212	0	0	0	0
523	C=CCC=C	1,4-PENTADIENE	114.05	0	0	0	0	0	0	0	0	0	0	0	0	0	0	0	0	0	0	0.027553	6.67363	13.4892	13.2109	10.8223	11.7375	10.6435	8.91187	7.97774	6.5676	12.2749	4.37916	3.63749	7.00393	4.91909	4.18235	2.43119	0	0	0	0	0	0	0	0	0	0	0
524	CCOC(C)C	ETHYL_ISOPROPYL_ETHER	135.739	0	0	0	0	0	0	0	0	0	0	0	0	0	0	0	0	0	0	0	0	2.02959	14.9364	22.5158	24.6734	16.9737	15.0234	15.4788	17.044	4.6402	1.73751	0.566264	0.667215	1.2843	0.927491	0.41574	0.782227	1.95233	2.37942	0.954929	1.21527	1.0781	0.005151	0	0	0	0
525	CCCOC	METHYL_N-PROPYL_ETHER	114.636	0	0	0	0	0	0	0	0	0	0	0	0	0	0	0	0	0	0	0	0.912783	1.96462	11.6544	21.4086	21.5996	18.5714	15.0801	10.2661	10.7931	2.77659	0.895005	1.23884	1.44954	0.868587	0.797158	0.808724	1.18983	2.52055	1.27225	1.45172	2.15318	0.169687	0	0	0	0	0
526	COC(C)C	METHYL_ISOPROPYL_ETHER	114.31	0	0	0	0	0	0	0	0	0	0	0	0	0	0	0	0	0	0	0	0.670601	3.72122	15.3123	18.8728	18.987	15.0221	12.2057	11.8045	11.7426	3.14694	1.96547	0.792999	0.462792	1.83779	0.787165	0.583293	0.695291	2.3631	1.27313	1.66926	1.78282	0.779151	0	0	0	0	0
527	N#CCCCC#N	GLUTARONITRILE	133.664	0	0	0	0	0	0	0	0	0	0	0	0	0	0	0	5.97095	14.9553	11.152	14.5858	8.56344	7.13791	2.64999	5.13413	6.07977	2.21277	1.60385	4.73606	5.72621	2.16128	1.98725	3.61166	2.83908	4.12189	7.96991	8.87022	11.338	8.07957	5.46916	0.543889	0	0	0	0	0	0	0
528	CC(=O)Nc1ccccc1	ACETANILIDE	173.078	0	0	0	0	0	0	0	0	0.060724	0.563091	1.10331	1.00785	0.857737	1.58946	0.358418	1.0807	1.12802	1.44699	5.67543	11.4111	12.3963	14.1556	12.4185	9.66424	13.6725	10.029	8.69886	11.2448	12.9092	11.3	11.4672	6.27494	0.867382	1.61177	2.31498	2.04757	2.76348	4.02893	2.07823	1.70486	0.178518	0	0	0	0	0
529	COCCOCCOC	DIETHYLENE_GLYCOL_DIMETHYL_ETHER	181.513	0	0	0	0	0	0	0	0	0	0	0	0	0	0	0	0	0	0	0.069581	2.69007	12.5461	36.8083	28.7898	20.4749	23.411	16.7322	7.36365	3.97286	2.97429	4.89817	2.40414	1.87325	2.30134	2.60088	6.96852	6.3134	2.04653	5.39211	4.11264	0.274621	0	0	0	0	0	0
530	CCCCCCCCCCCCCCO	1-TETRADECANOL	332.849	0	0	0	0	0	0	0	0	0	0.248565	0.589093	1.77955	0.189537	0.65728	0.923373	1.1077	0.803051	0.629019	0.737971	1.04761	2.29186	5.86764	22.7165	54.3772	67.6632	52.827	43.0617	26.4968	24.7565	2.75966	1.61248	1.10123	0.736463	0.865764	1.04903	1.19252	1.20694	1.54961	2.32725	2.2005	1.85315	0.864307	0	0	0	0
531	CCCCCCCCCCCCCCCCCO	1-HEPTADECANOL	398.56	0	0	0	0	0	0	0	0	0	0.269352	0.668822	1.56459	0.088079	0.781954	1.02064	1.22592	0.65055	0.616245	0.720457	1.22522	2.19701	6.09297	24.9273	63.0156	83.1643	64.0849	53.4755	31.7523	30.084	3.48038	1.04916	1.32011	0.804805	1.04527	1.14346	0.848839	1.18097	1.98719	1.71697	2.44062	1.96866	0.8213	0	0	0	0
532	CCCCCOCCCCC	DI-N-PENTYL_ETHER	244.536	0	0	0	0	0	0	0	0	0	0	0	0	0	0	0	0	0	0	0	0	0	4.38838	34.6564	49.794	46.8453	33.6618	25.1447	27.4698	13.2611	1.71258	0.388782	1.31714	1.23692	0.256045	0.509005	1.11895	2.29508	2.51717	0.664216	1.59362	0.842362	0	0	0	0	0
533	CCCCC[C@@H](C)CC	3-METHYLOCTANE	211.123	0	0	0	0	0	0	0	0	0	0	0	0	0	0	0	0	0	0	0	0	0	1.71161	16.8497	32.3832	44.7543	31.4031	31.1891	29.4212	20.8674	2.04889	0	0	0	0	0	0	0	0	0	0	0	0	0	0	0	0
534	C[C@H]1CCCC[C@H]1C	CIS-1,2-DIMETHYLCYCLOHEXANE	173.55	0	0	0	0	0	0	0	0	0	0	0	0	0	0	0	0	0	0	0	0	0	0.382304	11.1982	27.7442	35.8667	30.6134	20.3163	20.6344	17.9884	1.52111	0	0	0	0	0	0	0	0	0	0	0	0	0	0	0	0
535	C1=CCCC1	CYCLOPENTENE	103.305	0	0	0	0	0	0	0	0	0	0	0	0	0	0	0	0	0	0	0	0.632137	3.30172	7.05618	15.3821	17.2663	15.0351	12.3931	13.6186	12.9569	3.54625	2.28766	4.56381	1.43644	2.54249	2.73717	1.23224	0.01333	0	0	0	0	0	0	0	0	0	0
536	C1=CCCCCC1	CYCLOHEPTENE	144.389	0	0	0	0	0	0	0	0	0	0	0	0	0	0	0	0	0	0	0	0	0.440843	6.28689	18.3535	25.8833	23.8368	18.5198	20.1157	12.2479	4.9823	3.84871	2.13489	2.40928	2.61372	1.93845	1.55304	0.623036	0	0	0	0	0	0	0	0	0	0
537	C1=CCC=CC1	1,4-CYCLOHEXADIENE	115.727	0	0	0	0	0	0	0	0	0	0	0	0	0	0	0	0	0	0	0	0.366881	9.50195	17.7412	16.5198	13.3982	14.4091	9.59	5.03196	6.11349	6.64478	3.06637	5.63602	6.49508	5.11372	5.3663	1.49161	0	0	0	0	0	0	0	0	0	0	0
538	C=C[C@@H]1CC=CCC1	VINYLCYCLOHEXENE	160.938	0	0	0	0	0	0	0	0	0	0	0	0	0	0	0	0	0	0	0	0.749988	6.28882	17.0052	24.149	21.3407	17.6458	17.0485	13.5215	6.65178	6.58262	6.96685	5.5716	4.71711	5.11974	4.76097	2.98613	0.234445	0	0	0	0	0	0	0	0	0	0
539	Nc1ccccc1Cl	O-CHLOROANILINE	146.613	0	0	0	0	0	0	0	0	0	0.01977	0.623914	1.67159	1.74464	2.02548	1.84561	2.34832	1.76384	2.3599	5.28437	8.09576	7.19994	7.58288	6.83606	7.06027	4.66405	7.96425	7.72715	7.5446	14.845	19.3459	13.7063	9.72315	7.52652	2.12996	0.591228	0	0	0	0	0	0	0	0	0	0	0
540	Nc1cccc(Cl)c1	M-CHLOROANILINE	148.48	0	0	0	0	0	0	0	0	0	0	0.646347	2.78286	2.0928	2.28973	2.30018	2.57706	3.21988	2.98581	5.49465	7.42707	6.75504	6.02097	6.90308	5.31463	4.20822	5.84073	7.7935	5.61765	13.0454	18.5363	23.4905	10.9737	6.19273	1.3259	0.89634	0.253432	0	0	0	0	0	0	0	0	0	0
541	Nc1ccc(Cl)cc1	P-CHLOROANILINE	148.119	0	0	0	0	0	0	0	0	0	0	0.466018	2.51225	2.21177	2.23843	2.33603	2.30945	3.0549	3.77252	7.65822	7.03983	6.52186	5.77444	5.23798	6.52562	4.46352	4.01054	7.57282	9.8541	8.36138	14.9885	24.0435	16.8795	4.17599	1.09424	0.986503	0.501469	0	0	0	0	0	0	0	0	0	0
542	Nc1ccccc1[N+](=O)[O-]	O-NITROANILINE	153.929	0	0	0	0	0	0	0	0	0.101701	0.995382	1.28619	1.47509	1.13655	1.98147	1.36933	2.05671	2.86256	3.57368	8.06503	9.32745	5.92516	7.38403	5.55208	7.46264	9.37697	8.03651	11.7132	10.2948	11.1126	12.4915	8.37199	2.97839	6.34952	4.85902	3.91893	2.58997	1.89208	2.69489	1.69823	0.062605	0	0	0	0	0	0
543	Nc1cccc([N+](=O)[O-])c1	M-NITROANILINE	156.636	0	0	0	0	0	0	0	0	0	0.083545	1.39931	3.07829	2.40817	2.28329	2.24143	3.19926	3.75329	3.54272	6.75192	7.73975	5.89547	6.50428	5.56584	7.17723	6.3853	6.79387	8.43377	11.6144	14.4309	11.9026	8.85474	9.25906	9.13795	5.06288	3.35486	1.59424	3.21983	1.43939	0.052201	0	0	0	0	0	0	0
544	Nc1ccc([N+](=O)[O-])cc1	P-NITROANILINE	155.549	0	0	0	0	0	0	0	0	0	0	0.650877	3.20424	2.58724	2.86223	3.53398	2.20238	2.81073	4.57036	7.1868	6.91048	6.55885	5.12886	6.70595	5.889	8.67506	10.5328	14.1424	12.6049	10.6369	3.77592	3.58396	4.23615	9.00639	9.26789	4.62473	4.20847	1.95221	3.44646	1.21316	0.022011	0	0	0	0	0	0
545	CCC(C)(C)OC	METHYL_TERT-PENTYL_ETHER	156.555	0	0	0	0	0	0	0	0	0	0	0	0	0	0	0	0	0	0	0	0.28977	3.61223	16.3171	19.7348	23.7223	18.8702	18.4714	18.7334	15.9267	5.28246	2.4703	1.58001	0.414733	0.454358	1.60745	0.667533	0.651017	1.11803	1.698	1.48301	1.46266	1.23032	0	0	0	0	0
546	C/C=C/CCCCC	TRANS-2-OCTENE	184.109	0	0	0	0	0	0	0	0	0	0	0	0	0	0	0	0	0	0	0	0	1.06316	9.69655	21.4557	32.2205	30.3757	25.2603	23.9398	19.8763	12.9778	3.98837	3.20865	2.86619	3.08414	1.93676	1.06494	0.003843	0	0	0	0	0	0	0	0	0	0
547	CC/C=C/CCCC	TRANS-3-OCTENE	183.79	0	0	0	0	0	0	0	0	0	0	0	0	0	0	0	0	0	0	0	0	0.282874	7.17123	24.9823	33.1638	29.8031	24.0322	22.8434	23.0078	12.6417	3.43475	3.00872	3.34391	2.6968	2.2644	0.413453	0	0	0	0	0	0	0	0	0	0	0
548	CCC/C=C/CCC	TRANS-4-OCTENE	184.279	0	0	0	0	0	0	0	0	0	0	0	0	0	0	0	0	0	0	0	0	0.300655	6.56135	26.3215	33.065	30.0455	21.938	23.1722	24.4151	12.2178	3.33316	3.15453	4.41445	2.25252	1.35338	0.849988	0.010217	0	0	0	0	0	0	0	0	0	0
549	CCOC(=O)C(=O)OCC	DIETHYL_OXALATE	176.482	0	0	0	0	0	0	0	0	0	0	0	0	0	0	0	0	0	0.377283	5.81161	12.9587	23.3045	23.2098	18.8719	15.9046	11.0817	14.7198	8.71517	2.8719	3.10527	3.24727	4.82097	3.67495	5.35739	4.76708	9.05329	9.29727	3.44111	2.16418	1.80626	0.667276	0	0	0	0	0	0
550	C=C(C)[C@H]1CC=C(C)CC1	D-LIMONENE	205.315	0	0	0	0	0	0	0	0	0	0	0	0	0	0	0	0	0	0	0	0.095421	3.27933	18.9537	27.6092	28.925	19.7014	20.9668	23.0214	16.376	7.02737	7.35839	5.87404	4.48897	5.8252	3.07274	1.86452	0.411453	0	0	0	0	0	0	0	0	0	0
551	CCCCCCOC(C)=O	N-HEXYL_ACETATE	205.606	0	0	0	0	0	0	0	0	0	0	0	0	0	0	0	0	0	0.383739	3.04703	5.37549	9.44939	12.5778	25.3876	35.2588	32.9777	21.2201	16.3599	13.9861	7.96495	3.06606	1.67806	1.87929	3.65286	2.44571	2.98202	2.66091	4.37925	4.13403	2.17195	0.362599	0	0	0	0	0	0
552	c1ccc2c(c1)CCC2	INDANE	161.082	0	0	0	0	0	0	0	0	0	0	0	0	0	0	0	0	0	0	0.240834	4.67031	8.44969	16.863	18.846	20.559	16.4189	13.6272	14.7845	9.12939	6.97352	6.42627	5.21303	10.005	5.89038	4.92225	0.46689	0	0	0	0	0	0	0	0	0	0	0
553	CCCCCCCCCCCCCCCO	1-PENTADECANOL	353.76	0	0	0	0	0	0	0	0	0	0.275701	0.702841	1.5314	0.080897	0.82098	0.995235	1.21425	0.734979	0.52942	0.745786	1.17697	2.21048	6.15102	23.9076	56.372	72.5695	55.8913	46.526	28.5083	26.2985	3.27584	1.0395	1.24968	0.945203	1.07627	1.13363	0.862403	1.18473	1.89671	1.74935	2.45269	1.9612	0.80659	0	0	0	0
554	COCCC#N	3-METHOXYPROPIONITRILE	119.255	0	0	0	0	0	0	0	0	0	0	0	0	0	0	0	0.768387	4.63879	4.74415	4.34692	10.0743	15.5706	12.2808	10.9482	11.0136	7.29522	3.05215	4.8453	4.06446	2.23798	1.78093	2.4911	2.58203	3.40631	6.09385	5.77108	6.18401	6.03886	4.49946	0.379162	0	0	0	0	0	0	0
555	CCCCOC(=O)CCCC	N-BUTYL_VALERATE	226.4	0	0	0	0	0	0	0	0	0	0	0	0	0	0	0	0	0	0	0.449559	3.89243	7.24071	15.3578	35.4741	37.9235	31.6169	23.0332	20.5614	20.9933	7.06913	2.41082	2.46504	2.04606	3.17195	2.53317	3.14819	2.46011	4.61552	4.23898	1.43931	0.040812	0	0	0	0	0	0
556	C/C=C/C#N	TRANS-CROTONITRILE	101.876	0	0	0	0	0	0	0	0	0	0	0	0	0	0	0	0.823019	2.71172	4.15836	4.65399	9.18474	9.303	8.09931	7.76114	8.79444	13.1156	7.32007	5.30242	6.41759	3.60506	0.845522	1.96317	1.05729	2.27829	3.14247	4.45013	5.81853	4.24677	3.17262	0.953366	0	0	0	0	0	0	0
557	C/C=C\C#N	CIS-CROTONITRILE	101.298	0	0	0	0	0	0	0	0	0	0	0	0	0	0	0	0.588891	2.94353	4.53984	5.7633	7.84423	8.77628	7.72335	6.88544	9.39019	10.0864	8.41581	5.95891	5.44456	4.5071	0.898859	3.05309	1.43909	1.84143	3.65709	3.69411	5.50236	4.04313	3.02487	0.753045	0	0	0	0	0	0	0
558	C=CCC#N	VINYLACETONITRILE	102.166	0	0	0	0	0	0	0	0	0	0	0	0	0	0	0	3.37235	5.20428	3.09133	6.93153	11.0233	9.60053	4.49107	5.25382	7.57121	4.32322	6.58369	5.88743	5.17597	2.80639	4.80014	4.40185	2.98623	4.10251	3.95015	4.3221	5.67619	4.01034	2.7651	0.286159	0	0	0	0	0	0	0
559	CC(F)F	1,1-DIFLUOROETHANE	75.4783	0	0	0	0	0	0	0	0	0	0	0	0	0	0	0	0	1.3021	4.195	3.19942	8.63545	7.63694	5.07545	5.11499	5.07348	7.09493	1.84039	2.11839	2.23908	2.84498	7.21268	11.8922	14.7552	2.59864	0	0	0	0	0	0	0	0	0	0	0	0	0
560	CC[C@H](C)N	SEC-BUTYLAMINE	118.29	0	0	0	0	0	0	0	0	0	0	0	0	0	0	0.077971	0.908873	2.68484	1.65857	2.32637	2.36092	3.6291	6.48422	11.6354	17.9512	19.8892	13.3847	11.7884	16.0407	5.1957	1.51301	1.2963	0.416942	0.906031	0.854574	0.36177	1.06722	0.40053	0.186938	0.07937	0.949526	1.26784	0.790512	0.319707	0.077143	0.75722	0.381272
561	CC[C@H](C)Cl	SEC-BUTYL_CHLORIDE	125.075	0	0	0	0	0	0	0	0	0	0	0	0	0	0	0	0	0	0	0.806017	2.79329	8.44237	14.9671	15.1252	13.4996	11.7294	15.6708	10.5734	7.83452	6.17285	3.33322	3.08773	8.01199	7.07499	4.42393	0	0	0	0	0	0	0	0	0	0	0	0
562	CC[C@H](C)C1CCCCC1	SEC-BUTYLCYCLOHEXANE	213.903	0	0	0	0	0	0	0	0	0	0	0	0	0	0	0	0	0	0	0	0	0.05667	1.44972	12.5171	30.3058	42.644	36.9634	30.7588	26.2427	17.6094	1.11393	0	0	0	0	0	0	0	0	0	0	0	0	0	0	0	0
563	c1ccc2cc3ccccc3cc2c1	ANTHRACENE	224.223	0	0	0	0	0	0	0	0	0	0	0	0	0	0	0	0	0	0	2.65443	19.0436	20.9582	17.4841	12.7883	10.0095	10.7602	10.4349	12.4977	13.9322	27.5959	36.01	19.4516	1.66858	0	0	0	0	0	0	0	0	0	0	0	0	0	0
564	c1ccc2c(c1)ccc1ccccc12	PHENANTHRENE	222.638	0	0	0	0	0	0	0	0	0	0	0	0	0	0	0	0	0.074516	1.59824	3.04683	18.7418	19.5763	16.1115	12.3449	10.5529	8.23246	12.3579	12.0985	14.095	28.5681	30.6583	21.6571	2.67948	0	0	0	0	0	0	0	0	0	0	0	0	0	0
565	CCCCCC[C@H](C)O	2-OCTANOL	201.777	0	0	0	0	0	0	0	0	0	0.17576	0.498706	1.59923	0.303506	0.876467	0.376761	1.27693	1.07614	0.45888	0.652542	1.30232	2.26139	6.34699	19.5072	31.7241	35.1175	25.3135	25.3987	19.6294	14.887	2.39719	1.06407	0.963541	1.05102	0.673022	1.08327	0.483622	1.3971	2.30104	1.94832	1.75463	1.331	0.467326	0	0	0	0
566	C/C=C\CC	CIS-2-PENTENE	117.934	0	0	0	0	0	0	0	0	0	0	0	0	0	0	0	0	0	0	0	0.078507	2.71228	12.1783	16.4688	19.0166	14.3248	14.9174	15.9898	13.7459	6.99433	2.88153	2.81095	2.2921	3.22836	2.37123	1.53881	0.227797	0	0	0	0	0	0	0	0	0	0
567	CCCCCC(C)(C)C	2,2-DIMETHYLHEPTANE	211.905	0	0	0	0	0	0	0	0	0	0	0	0	0	0	0	0	0	0	0	0	0	1.37566	18.8957	35.566	43.0151	25.9271	26.5968	24.1035	26.6168	3.85088	0	0	0	0	0	0	0	0	0	0	0	0	0	0	0	0
568	ClC(Cl)=C(Cl)C(Cl)=C(Cl)Cl	HEXACHLORO-1,3-BUTADIENE	226.971	0	0	0	0	0	0	0	0	0	0	0	0	0	0	0	0	0	0.727719	1.66154	10.6721	6.07684	4.10868	13.7127	16.1801	14.7088	23.4962	42.1322	52.0477	23.3264	0.447679	0	0	0	0	0	0	0	0	0	0	0	0	0	0	0	0
569	ClC(Cl)(Cl)C(Cl)(Cl)Cl	HEXACHLOROETHANE	191.766	0	0	0	0	0	0	0	0	0	0	0	0	0	0	0	0	0	1.14272	2.07862	14.2868	3.57704	1.77689	17.1162	13.7926	0.113416	18.2722	25.4068	45.7397	32.2021	0	0	0	0	0	0	0	0	0	0	0	0	0	0	0	0	0
570	O=C1CCCCCO1	EPSILON-CAPROLACTONE	144.13	0	0	0	0	0	0	0	0	0	0	0	0	0	0	0	0	0	0.170018	3.19367	9.77293	15.575	19.2069	21.2402	16.1085	11.1889	9.35291	5.11239	1.54502	1.7617	2.29967	1.57623	0.857617	2.03815	1.5084	2.41692	3.05054	4.44623	6.93099	3.52872	2.35842	1.07867	0.024587	0	0	0	0
571	CCCc1cccc2ccccc12	1-N-PROPYLNAPHTHALENE	230.527	0	0	0	0	0	0	0	0	0	0	0	0	0	0	0	0	0	0	2.00106	12.3892	14.8517	20.4128	23.2608	19.5912	15.7481	16.0247	14.8882	16.7401	10.8463	12.5301	19.2255	16.5717	5.53541	0	0	0	0	0	0	0	0	0	0	0	0	0
572	CCCCCCc1ccccc1	N-HEXYLBENZENE	240.05	0	0	0	0	0	0	0	0	0	0	0	0	0	0	0	0	0	0	0.383011	6.44461	9.34453	14.8784	23.3447	33.1105	32.8814	25.2352	22.5233	18.1699	16.7953	6.03388	7.2954	9.1412	8.08068	3.63608	0.104452	0	0	0	0	0	0	0	0	0	0	0
573	CCCC#N	N-BUTYRONITRILE	107.14	0	0	0	0	0	0	0	0	0	0	0	0	0	0	0	0	1.49019	4.99871	4.20509	4.30928	10.7332	16.0629	10.791	9.67729	10.117	6.55191	7.84291	5.57484	1.89788	0.866535	1.82676	0.992737	2.39699	2.45826	4.87015	5.77211	4.47118	3.33029	1.2774	0	0	0	0	0	0	0
574	F[C@H](Cl)C(F)(F)F	2-CHLORO-1,1,1,2-TETRAFLUOROETHANE	114.979	0	0	0	0	0	0	0	0	0	0	0	0.705241	3.40002	1.35345	1.82523	0.59623	0.512072	0.332946	0.911133	1.59882	3.66291	2.21402	2.10189	5.06567	3.51554	8.47455	30.1322	38.2172	17.748	2.10196	0	0	0	0	0	0	0	0	0	0	0	0	0	0	0	0
575	Clc1cccc(Cl)c1Cl	1,2,3-TRICHLOROBENZENE	175.458	0	0	0	0	0	0	0	0	0	0	0	0	0	0	0	0.075809	2.7251	7.35238	5.15414	5.7709	4.76701	10.5589	2.88186	4.7719	14.6036	20.9212	16.2088	24.1448	30.0231	20.5156	3.3592	0	0	0	0	0	0	0	0	0	0	0	0	0	0	0
576	CN1CCCC1	N-METHYLPYRROLIDINE	126.801	0	0	0	0	0	0	0	0	0	0	0	0	0	0	0	0	0	0	0	0	1.26349	8.21007	16.0852	19.0152	25.6622	21.7876	20.2867	11.1794	1.48802	0.855901	0.315542	1.99581	0.451596	0.652725	0.180279	0.849011	0.250454	0.839283	0.878061	0.562531	0.274119	0.303063	0.889449	0.37488	0.112393	0
577	C1CN1	ETHYLENEIMINE	66.5081	0	0	0	0	0	0	0	0	0	0	0	0	0	0.161533	1.50061	1.402	0.890117	1.88489	1.63213	6.34202	8.75858	8.41107	5.36965	5.00067	6.40111	5.25345	3.9324	4.81587	2.48148	4.12414	2.36999	1.13121	0.875613	1.29498	0.580361	0.675169	1.06688	1.09085	1.5411	0.787832	0.99561	0.855321	1.07354	0.858563	0.535748	0
578	CNC1CCCCC1	N-METHYLCYCLOHEXYLAMINE	166.195	0	0	0	0	0	0	0	0	0	0	0	0	0	0	0	0.595206	1.20872	0.986882	0.996443	1.09377	1.61801	6.85035	14.0668	23.7162	33.0232	26.2524	24.1197	14.1685	5.33517	0.971054	1.40505	1.0545	0.40083	0.319424	0.741586	0.701843	0.421602	0.694378	0.487638	0.481325	0.712122	0.534565	0.285041	1.01631	0.36008	0.277076
579	C=C/C=C\C	CIS-1,3-PENTADIENE	112.301	0	0	0	0	0	0	0	0	0	0	0	0	0	0	0	0	0	0	0.890929	5.14548	12.6462	13.4664	12.8502	9.34445	9.02415	10.7027	10.1228	8.15644	5.05115	5.89655	5.65261	7.85901	6.08271	3.93756	0.3616	0	0	0	0	0	0	0	0	0	0	0
580	C=C(C)CCC(=C)C	2,5-DIMETHYL-1,5-HEXADIENE	180.029	0	0	0	0	0	0	0	0	0	0	0	0	0	0	0	0	0	0	0	0.354185	9.82233	22.454	26.9441	17.2702	14.6296	17.9091	19.863	11.5069	7.85186	8.16987	7.05539	4.7376	6.3507	4.32266	2.65452	0.18852	0	0	0	0	0	0	0	0	0	0
581	CCCCCCOCCCCCC	DI-N-HEXYL_ETHER	288.256	0	0	0	0	0	0	0	0	0	0	0	0	0	0	0	0	0	0	0	0	0	4.12893	35.2805	57.8156	56.4393	42.2491	30.7789	30.3792	17.7567	1.92162	0.392534	1.31871	1.23822	0.2514	0.542987	1.04941	2.30955	2.50858	0.656067	1.64883	0.793699	0	0	0	0	0
582	CC(C)COC=O	ISOBUTYL_FORMATE	141.929	0	0	0	0	0	0	0	0	0	0	0	0	0	0	0	0	1.7503	3.24091	1.72426	3.16134	5.94052	13.8123	20.2034	19.8663	13.1417	13.3365	13.3428	11.2064	3.06493	2.01471	2.21544	3.31292	1.74159	2.97793	2.00503	5.44485	4.23217	2.04916	0.457281	0	0	0	0	0	0	0
583	CCCCCCCOC(C)=O	N-HEPTYL_ACETATE	227.629	0	0	0	0	0	0	0	0	0	0	0	0	0	0	0	0	0	0.38446	3.05017	5.40979	9.46856	12.3795	25.987	38.9157	37.7735	25.4829	19.5403	15.3796	10.211	3.14337	1.60221	1.95784	3.5914	2.50058	2.88375	2.77379	4.14574	4.19876	2.29102	0.362139	0	0	0	0	0	0
584	CCCCCCC(C)=O	2-OCTANONE	195.074	0	0	0	0	0	0	0	0	0	0	0	0	0	0	0	0	0	0.01028	1.93402	8.07586	10.722	10.4709	18.5477	30.6782	32.1942	23.2123	17.7314	15.256	8.87533	2.1447	1.05796	0.624299	0.873252	1.62579	2.38849	0.517065	4.35967	4.45465	1.96807	2.14197	0.500529	0	0	0	0	0
585	CCC[C@@H](C)CO	2-METHYL-1-PENTANOL	157.673	0	0	0	0	0	0	0	0	0	0.224858	0.634472	1.59064	0.042745	0.856712	0.973329	1.13661	0.807234	0.61525	0.801926	0.999517	1.63966	6.05852	20.268	24.7125	22.8981	17.0942	17.6196	16.3093	10.3115	2.27136	1.39216	0.656052	0.975321	0.926819	1.04692	1.5068	0.95	1.50499	1.33639	2.51316	1.53431	0.559464	0	0	0	0
586	CCCN(CCC)CCC	TRIPROPYLAMINE	229.122	0	0	0	0	0	0	0	0	0	0	0	0	0	0	0	0	0	0	0	0	0.724834	9.21695	25.0847	31.566	39.3791	34.5146	30.4552	33.3427	11.3444	2.63951	2.07841	0.791414	0.194344	0.107814	0.023691	0.947274	0.691966	0	0	0.122796	1.40343	0.623054	0.084044	0.032636	0	0
587	CCCCCc1ccccc1	N-PENTYLBENZENE	217.935	0	0	0	0	0	0	0	0	0	0	0	0	0	0	0	0	0	0	0.376952	6.43457	9.55988	14.7776	23.1746	28.9405	27.9648	21.0198	19.4936	16.7353	14.8082	5.98147	7.25704	9.24055	7.85591	3.71368	0.122606	0	0	0	0	0	0	0	0	0	0	0
588	O=P(Oc1ccccc1)(Oc1ccccc1)Oc1ccccc1	TRIPHENYL_PHOSPHATE	382.903	0	0	0	0	0	0	0	0	0	0	0	0	0	0	0	0	0.099676	5.37164	25.2977	28.8319	25.6492	19.4537	17.4138	17.4663	12.6343	15.684	21.8838	27.4592	26.1868	38.4444	30.7148	14.0163	1.43511	2.24757	1.70219	2.58121	5.36986	1.81657	0	0	0	0	0	0	0	0
589	C1=C\CC/C=C/CC/C=C\CC/1	1,5,9-CYCLODODECATRIENE	238.36	0	0	0	0	0	0	0	0	0	0	0	0	0	0	0	0	0	0	0	0.673885	3.53743	24.0594	27.8695	36.6643	23.5128	21.2809	18.2095	12.1712	9.25532	6.89765	7.80571	7.08574	5.61283	4.24951	3.87697	0.593438	0	0	0	0	0	0	0	0	0	0
590	C=COC(=O)CC	VINYL_PROPIONATE	134.273	0	0	0	0	0	0	0	0	0	0	0	0	0	0	0	0	0	1.062	7.45311	9.453	10.4445	11.4604	13.2211	15.0178	10.8126	9.83449	11.4232	5.98381	5.63122	6.06301	7.04838	5.42164	5.83943	1.68923	2.27378	5.20857	2.57601	0.570107	0	0	0	0	0	0	0	0
591	CCCCCCCc1ccccc1	N-HEPTYLBENZENE	261.795	0	0	0	0	0	0	0	0	0	0	0	0	0	0	0	0	0	0	0.362442	6.37226	9.37746	15.08	23.8992	36.465	37.4868	29.314	26.5064	19.053	19.026	6.49116	6.89255	9.42605	7.96681	3.63293	0.089208	0	0	0	0	0	0	0	0	0	0	0
592	CCCCCCc1cccc2ccccc12	1-N-HEXYLNAPHTHALENE	296.881	0	0	0	0	0	0	0	0	0	0	0	0	0	0	0	0	0	0	2.48176	12.9158	15.1708	16.5384	25.2344	33.0472	31.9864	26.6099	23.3297	21.7521	18.1427	12.5185	20.0657	15.9643	5.35514	0	0	0	0	0	0	0	0	0	0	0	0	0
593	N#CCCO	HYDRACRYLONITRILE	96.8117	0	0	0	0	0	0	0	0	0.823017	0.984205	1.61346	0.456341	0.540181	1.44913	1.58587	2.4561	5.55285	5.61131	8.48484	7.21638	7.52452	4.62988	4.24162	4.98837	2.54646	1.95264	2.39103	4.5605	2.45498	1.6346	2.75441	2.39112	2.79911	5.01909	5.74544	7.09263	5.6557	4.81445	2.65103	1.01979	0	0	0	0	0	0
594	CCOc1ccc(N)cc1	P-PHENETIDINE	179.834	0	0	0	0	0	0	0	0	0	0	0.004946	1.06121	2.77043	1.70121	2.07186	2.25757	2.19961	2.99076	4.55548	6.8179	13.5167	17.6293	13.8568	12.8182	9.26816	9.48272	11.0391	7.23691	5.01167	8.22128	6.85129	12.6029	11.1235	10.1987	4.17132	2.60705	2.42841	0.8275	0	0	0	0	0	0	0	0
595	FC(F)(F)F	CARBON_TETRAFLUORIDE	69.6646	0	0	0	0	0	0	0	0	0	0	0	0	0	0	0	0	0	0	0	0	1.16801	1.98556	2.52095	3.65592	11.0797	27.6533	37.8274	1.39884	0	0	0	0	0	0	0	0	0	0	0	0	0	0	0	0	0	0
596	C/C=C\CCC	CIS-2-HEXENE	139.867	0	0	0	0	0	0	0	0	0	0	0	0	0	0	0	0	0	0	0	0.065432	2.48461	10.7106	19.3223	22.9381	19.8893	17.0013	18.4298	16.2503	8.61953	3.23226	2.67132	2.48511	2.96257	2.14881	1.9066	0.243632	0	0	0	0	0	0	0	0	0	0
597	C/C=C\CCCCC	CIS-2-OCTENE	183.621	0	0	0	0	0	0	0	0	0	0	0	0	0	0	0	0	0	0	0	0.045171	2.37535	10.4455	20.3738	30.8694	30.2518	24.6312	23.6344	19.2866	13.2287	3.25198	2.921	2.13155	3.43071	1.88702	1.96371	0.314353	0	0	0	0	0	0	0	0	0	0
598	CC/C=C\CCCC	CIS-3-OCTENE	183.326	0	0	0	0	0	0	0	0	0	0	0	0	0	0	0	0	0	0	0	0	0.367229	7.91512	24.1079	33.5817	29.1042	24.3418	22.8559	22.4449	9.98064	4.20074	2.342	2.13	3.0029	1.93524	2.10566	0.296122	0	0	0	0	0	0	0	0	0	0
599	CCC/C=C\CCC	CIS-4-OCTENE	182.842	0	0	0	0	0	0	0	0	0	0	0	0	0	0	0	0	0	0	0	0	0.41009	7.12977	25.6729	32.959	29.9867	22.8283	22.4902	23.0682	9.96539	4.13945	2.30014	2.06212	3.15133	1.88706	2.16433	0.307847	0	0	0	0	0	0	0	0	0	0
600	N#CCc1ccccc1	PHENYLACETONITRILE	157.876	0	0	0	0	0	0	0	0	0	0	0	0	0	0	0.330701	4.37596	4.30523	3.93855	8.97905	14.5887	12.0914	7.75791	7.90763	10.4558	5.12987	7.35022	7.42532	10.2428	6.11287	9.50118	11.2676	9.41594	2.99788	4.10511	4.23493	4.41484	4.07477	2.3616	0.157967	0	0	0	0	0	0	0
601	C#CC(=C)C	2-METHYL-1-BUTENE-3-YNE	108.765	0	0	0	0	0	0	0	0	0	0	0	0	0.494752	1.19157	1.9311	1.38764	0.218479	1.21606	2.25906	6.89163	9.31462	7.47532	9.7654	6.33626	6.59425	9.39294	9.81428	7.52993	5.13424	6.89453	11.4555	7.54234	9.64655	1.28037	0	0	0	0	0	0	0	0	0	0	0	0
602	CC#CCC	2-PENTYNE	111.352	0	0	0	0	0	0	0	0	0	0	0	0	0	0	0	0	0	0	0.315968	5.77286	10.4626	14.1725	12.4794	13.7661	15.8717	8.87994	9.37919	7.91917	3.58141	2.54969	3.49051	5.99885	2.44082	8.58268	4.30128	0.027441	0	0	0	0	0	0	0	0	0	0
603	C#CC(C)C	3-METHYL-1-BUTYNE	114.949	0	0	0	0	0	0	0	0	0	0	0	0	0.044743	0.563717	1.43296	1.81397	1.11041	0.272787	1.08822	1.72599	6.26149	12.4745	14.0899	14.5565	9.75578	7.24531	15.5788	8.50915	3.86155	2.47696	2.69374	5.69939	4.20502	9.27476	2.92301	0	0	0	0	0	0	0	0	0	0	0
604	C/C=C/CCC	TRANS-2-HEXENE	140.362	0	0	0	0	0	0	0	0	0	0	0	0	0	0	0	0	0	0	0	0	1.06555	10.1736	20.2707	24.2862	20.3365	17.2607	18.5592	17.3919	7.97887	3.75573	3.86679	2.85247	2.08295	2.7598	0.757822	0	0	0	0	0	0	0	0	0	0	0
605	CC/C=C/CC	TRANS-3-HEXENE	139.336	0	0	0	0	0	0	0	0	0	0	0	0	0	0	0	0	0	0	0	0	0.356739	8.50093	19.9515	23.7258	21.1032	20.0207	19.3594	20.0682	4.97337	3.63622	4.85615	1.37391	2.01729	2.16647	0.923471	0	0	0	0	0	0	0	0	0	0	0
606	C/C=C\CCCC	CIS-2-HEPTENE	161.789	0	0	0	0	0	0	0	0	0	0	0	0	0	0	0	0	0	0	0	0	1.44636	10.0645	20.2913	27.7195	25.8733	21.0464	21.8005	17.0873	9.72896	3.48648	2.74946	2.31904	3.01889	2.09037	1.98236	0.324096	0	0	0	0	0	0	0	0	0	0
607	C/C=C/CCCC	TRANS-2-HEPTENE	162.032	0	0	0	0	0	0	0	0	0	0	0	0	0	0	0	0	0	0	0	0	1.07223	9.84413	20.9765	28.4285	25.4686	20.8487	20.7556	18.5927	11.1162	3.4224	3.39175	3.24918	2.63606	2.18329	0.938601	0	0	0	0	0	0	0	0	0	0	0
608	CC/C=C/CCC	TRANS-3-HEPTENE	161.749	0	0	0	0	0	0	0	0	0	0	0	0	0	0	0	0	0	0	0	0	0.307725	7.46155	24.5313	28.8253	24.4329	20.2916	20.058	21.7722	10.5903	3.04585	3.33543	2.71809	2.99261	2.16504	0.430562	0	0	0	0	0	0	0	0	0	0	0
609	CCOCOCC	ETHYLAL	146.135	0	0	0	0	0	0	0	0	0	0	0	0	0	0	0	0	0	0	0	0.130672	7.4425	30.7884	28.3171	20.5375	15.3924	9.17177	17.0223	6.36393	1.31737	1.51599	1.73574	1.22645	1.39266	1.29013	1.89154	4.02931	1.50921	1.44696	4.43669	5.22652	0.085968	0	0	0	0	0
610	CCOC(C)OCC	ACETAL	170.947	0	0	0	0	0	0	0	0	0	0	0	0	0	0	0	0	0	0	0	0.074449	5.14389	18.966	25.1948	26.4909	25.1161	19.1793	21.635	8.99765	3.6909	1.46441	2.09012	2.32111	1.03977	1.08491	2.11165	3.75774	1.95837	2.82142	2.28271	1.03967	0	0	0	0	0	0
611	CCCC[N+](=O)[O-]	1-NITROBUTANE	134.809	0	0	0	0	0	0	0	0	0	0	0	0	0	0	0	0.313156	4.17664	4.93141	4.61028	3.77202	6.11145	13.53	16.9508	14.2757	10.2734	9.43029	9.54874	9.41864	2.46223	1.89822	4.00114	8.31032	8.67334	5.22273	3.44595	2.492	2.66006	0.559994	0	0	0	0	0	0	0	0
612	CCC#CCC	3-HEXYNE	132.536	0	0	0	0	0	0	0	0	0	0	0	0	0	0	0	0	0	0	0	1.91122	9.45181	17.8021	16.1867	19.0029	18.779	10.5916	15.1074	9.37568	4.73181	2.91813	2.95886	5.94623	2.31577	8.75657	4.07096	0	0	0	0	0	0	0	0	0	0	0
613	O=CC(Cl)(Cl)Cl	TRICHLOROACETALDEHYDE	131.973	0	0	0	0	0	0	0	0	0	0	0	0	0	0	0.831286	2.99396	1.50303	1.67198	2.47275	5.66016	6.55001	2.12358	11.0943	12.7895	4.6367	10.4806	23.6316	24.4683	8.49941	1.95754	2.03564	3.0192	4.29267	3.86898	2.46254	0.561942	0	0	0	0	0	0	0	0	0	0
614	O=C=O	CARBON_DIOXIDE	47.8438	0	0	0	0	0	0	0	0	0	0	0	0	0	0	0	0	0	0	2.5875	8.98805	5.50594	3.35914	2.05557	3.23723	0.798319	4.56587	0.17534	8.55545	2.2543	18.8245	5.44279	0	0	0	0	0	0	0	0	0	0	0	0	0	0	0
615	C=C	ETHYLENE	53.9298	0	0	0	0	0	0	0	0	0	0	0	0	0	0	0	0	0	0	0.317361	5.41075	7.38835	8.00429	4.35318	5.0903	6.87264	5.17191	3.17383	5.84256	4.74866	1.12759	4.32596	3.94627	1.74001	3.01126	1.73709	0.12025	0	0	0	0	0	0	0	0	0	0
616	CC	ETHANE	58.8097	0	0	0	0	0	0	0	0	0	0	0	0	0	0	0	0	0	0	0	0	0	0.440708	8.46499	9.9154	14.809	9.12357	13.6221	17.0538	4.12969	0	0	0	0	0	0	0	0	0	0	0	0	0	0	0	0	0
617	C=CC	PROPYLENE	75.602	0	0	0	0	0	0	0	0	0	0	0	0	0	0	0	0	0	0	0	0.816387	6.99668	10.1016	12.2641	7.44972	8.93868	8.58058	11.8429	4.59497	5.17816	4.72567	1.37847	3.13676	3.16286	1.8229	2.19509	0.134769	0	0	0	0	0	0	0	0	0	0
618	[C]=O	CARBON_MONOXIDE	40.4565	0	0	0	0	0	0	0	0	0	0	0	0	0	0	0	0	0	0	0	0	0	0	5.76752	14.7005	4.58365	10.9513	7.77993	6.58801	4.04765	0.595475	2.61028	0.442909	0	0	0	0	0	0	0	0	0	0	0	0	0	0
619	ClCl	CHLORINE	61.4032	0	0	0	0	0	0	0	0	0	0	0	0	0	0	0	0.325234	0.748546	3.02487	2.92973	0	1.25768	6.11859	3.96899	0.075832	0	9.41285	15.5315	24.0664	11.2598	0	0	0	0	0	0	0	0	0	0	0	0	0	0	0	0	0
620	C#C	ACETYLENE	50.2497	0	0	0	0	0	0	0	0	0	0	0	0	0.6589	1.82584	4.60834	2.83852	0.908308	1.82062	1.56454	1.14627	0.234638	4.34479	2.85353	0	0.870524	7.80218	4.35845	0.255264	2.3432	11.1185	1.12546	7.45721	8.35762	1.52389	0	0	0	0	0	0	0	0	0	0	0	0
621	O=C(Cl)C(Cl)Cl	DICHLOROACETYL_CHLORIDE	132.898	0	0	0	0	0	0	0	0	0	0	0	0.402145	2.63009	0.726623	2.02699	1.43443	0.694357	1.13488	1.22018	2.21716	6.72494	5.85987	4.13769	13.9398	6.47059	6.44279	22.5079	24.043	19.0191	3.98814	5.62544	5.42514	3.06133	0.165382	0	0	0	0	0	0	0	0	0	0	0	0
622	CC(F)(F)F	1,1,1-TRIFLUOROETHANE	82.3992	0	0	0	0	0	0	0	0	0	0	0	0	0	0	0	0	1.5784	5.45827	5.00258	5.45847	3.74052	2.65811	6.68519	2.36408	2.68693	3.69353	2.45974	8.95508	22.8137	23.2541	0.469821	0	0	0	0	0	0	0	0	0	0	0	0	0	0	0
623	FC(F)F	TRIFLUOROMETHANE	61.6855	0	0	0	0	0	0	0	0	0	0	0	0	0.863168	4.64171	1.43816	1.22379	1.12699	1.36267	1.14254	1.27186	1.11516	0.815136	1.57872	1.52752	1.64584	2.17307	7.7933	15.4564	28.956	6.11888	0	0	0	0	0	0	0	0	0	0	0	0	0	0	0	0
624	O=C(OCc1ccccc1)c1ccccc1	BENZYL_BENZOATE	263.347	0	0	0	0	0	0	0	0	0	0	0	0	0	0	0	0	0	1.17546	14.4998	24.3081	22.618	14.8285	15.3213	13.0763	15.9848	12.8319	16.2815	17.0987	20.5545	19.2066	17.4006	10.0207	5.4746	2.67712	2.04805	2.03743	5.76188	1.36236	0	0	0	0	0	0	0	0
625	CCCCC(=O)CC	3-HEPTANONE	172.219	0	0	0	0	0	0	0	0	0	0	0	0	0	0	0	0	0	0	0.093671	7.56583	9.86754	11.1826	21.2051	25.9222	26.9826	16.6271	14.8847	17.6917	6.11799	2.22908	0.768829	0.799471	0.94394	1.8158	2.24019	0.544966	4.10291	4.21896	2.3636	1.40923	0	0	0	0	0	0
626	CCCC(C)(C)C	2,2-DIMETHYLPENTANE	168.071	0	0	0	0	0	0	0	0	0	0	0	0	0	0	0	0	0	0	0	0	0	1.36602	18.2211	26.9115	34.4353	18.3013	19.6497	21.4933	21.9661	3.64274	0	0	0	0	0	0	0	0	0	0	0	0	0	0	0	0
627	C=C(Cl)Cl	1,1-DICHLOROETHYLENE	98.3447	0	0	0	0	0	0	0	0	0	0	0	0	0	0	0	0.294464	3.00088	3.54325	2.40486	3.56202	4.44977	5.82071	2.27026	6.34805	7.89842	4.76661	12.2347	20.7251	23.7609	10.836	0.131011	0	0	0	0	0	0	0	0	0	0	0	0	0	0	0
628	CCCC(C)CCC	4-METHYLHEPTANE	189.545	0	0	0	0	0	0	0	0	0	0	0	0	0	0	0	0	0	0	0	0	0	1.47996	16.9651	28.9972	39.2044	27.4863	28.223	27.7691	18.827	2.06294	0	0	0	0	0	0	0	0	0	0	0	0	0	0	0	0
629	CC(=O)OC(C)(C)C	TERT-BUTYL_ACETATE	161.518	0	0	0	0	0	0	0	0	0	0	0	0	0	0	0	0	0	0.083772	2.05009	4.52006	11.7798	16.9984	19.0522	15.3544	19.4158	14.4921	22.5158	8.84882	2.94	2.33484	2.04093	1.15204	3.39601	3.5428	2.49861	2.28214	2.75835	2.77481	1.76599	0.94483	0.020659	0	0	0	0	0
630	C1COC1	1,3-PROPYLENE_OXIDE	81.3031	0	0	0	0	0	0	0	0	0	0	0	0	0	0	0	0	0	0	0	0.083136	7.50659	14.8945	16.2996	13.8515	13.3856	7.7181	4.37953	1.49842	0.69505	1.21547	1.75695	0.803862	0.873585	0.695378	1.50528	1.36932	0.897361	2.55392	1.42211	2.70806	1.47508	0	0	0	0	0
631	C1COCOC1	1,3-DIOXANE	109.505	0	0	0	0	0	0	0	0	0	0	0	0	0	0	0	0	0	0.250074	1.94882	6.2507	12.847	19.3645	17.1362	12.3188	8.6119	5.30445	2.94702	2.87861	1.50847	2.61792	2.45117	1.43979	1.66326	1.36616	2.82963	3.40918	4.02584	4.08403	3.64193	0.663658	0	0	0	0	0	0
632	CCCCOC(=O)c1ccccc1	N-BUTYL_BENZOATE	234.354	0	0	0	0	0	0	0	0	0	0	0	0	0	0	0	0	0	0	2.79854	10.6072	13.564	15.7313	20.5961	26.5852	24.6592	19.8319	23.0833	22.8694	17.0219	12.5024	3.07024	1.71269	2.27604	1.49982	3.43989	1.29227	5.20138	2.1249	0	0	0	0	0	0	0	0
633	C[C@H]1CC[C@H](C)CC1	TRANS-1,4-DIMETHYLCYCLOHEXANE	172.037	0	0	0	0	0	0	0	0	0	0	0	0	0	0	0	0	0	0	0	0	0	0.71156	14.2286	28.2904	31.0005	25.1534	21.9388	24.7711	16.9678	1.30309	0	0	0	0	0	0	0	0	0	0	0	0	0	0	0	0
634	CC(C)(C)OC(C)(C)C	DI-TERT-BUTYL_ETHER	201.61	0	0	0	0	0	0	0	0	0	0	0	0	0	0	0	0	0	0	0	0.038423	2.91985	15.616	24.0971	29.8505	20.2927	17.902	19.186	32.1287	11.4807	2.07556	1.37083	0.676619	0.347945	0.891583	1.28587	0.550115	0.177997	1.1434	1.69114	1.15524	0.462075	0	0	0	0	0
635	C1CCC(C2CCCCC2)CC1	BICYCLOHEXYL	240.198	0	0	0	0	0	0	0	0	0	0	0	0	0	0	0	0	0	0	0	0	0	0	9.56388	35.3007	48.1714	44.3494	37.4176	30.5871	13.9465	0	0	0	0	0	0	0	0	0	0	0	0	0	0	0	0	0
636	C[C@H]1C[C@H](C)C[C@@H](C)C1	1-TRANS-3,5-TRIMETHYLCYCLOHEXANE	194.857	0	0	0	0	0	0	0	0	0	0	0	0	0	0	0	0	0	0	0	0	0.26841	2.34983	13.5874	27.9813	39.1149	28.9947	22.7583	22.6628	20.8909	2.56922	0	0	0	0	0	0	0	0	0	0	0	0	0	0	0	0
637	C[C@H](CC(C)(C)C)CC(C)(C)CC(C)(C)C	2,2,4,4,6,8,8-HEPTAMETHYLNONANE	362.713	0	0	0	0	0	0	0	0	0	0	0	0	0	0	0	0	0	0	0	0	0	2.09048	26.9307	53.4869	61.8714	37.663	33.0521	39.4897	44.0415	2.01568	0	0	0	0	0	0	0	0	0	0	0	0	0	0	0	0
638	C[C@H](O)[C@@H](C)O	2,3-BUTANEDIOL	125.02	0	0	0	0	0	0	0	0	0	0.53296	1.34083	2.77127	0.880372	0.848683	1.73604	2.67599	1.85316	1.1221	1.84039	1.68081	5.81206	11.2908	13.1397	12.6232	9.03035	8.67137	14.9337	9.78322	2.72548	2.24994	0.938571	2.74502	1.36065	0.813752	2.83219	4.35706	1.78543	2.89276	3.88004	2.89216	1.40401	0.23758	0	0	0	0
639	C1=CCCC=C1	1,3-CYCLOHEXADIENE	116.205	0	0	0	0	0	0	0	0	0	0	0	0	0	0	0	0	0	0	0	1.15259	9.66833	16.8484	17.7332	11.9404	13.1466	9.88885	6.79418	7.7575	4.21973	3.34868	5.39776	6.58977	4.2329	7.17394	0.943525	0	0	0	0	0	0	0	0	0	0	0
640	CCCCCCCCCCCCCCCCCC	N-OCTADECANE	408.237	0	0	0	0	0	0	0	0	0	0	0	0	0	0	0	0	0	0	0	0	0	0.890591	19.8203	64.072	93.5435	71.949	64.6276	37.9054	39.9789	3.47845	0	0	0	0	0	0	0	0	0	0	0	0	0	0	0	0
641	ClCCCCCl	1,4-DICHLOROBUTANE	149.355	0	0	0	0	0	0	0	0	0	0	0	0	0	0	0	0	0	1.65992	8.16971	10.8535	16.1745	18.1316	11.3222	8.52167	7.73078	4.90131	2.13769	10.658	8.0211	2.76411	10.6711	18.6356	16.2576	1.28675	0	0	0	0	0	0	0	0	0	0	0	0
642	ClCCCCCCl	1,5-DICHLOROPENTANE	171.7	0	0	0	0	0	0	0	0	0	0	0	0	0	0	0	0	0	0.843405	6.6779	8.89526	11.2756	24.7265	20.7245	14.3643	9.67052	9.10913	2.14605	9.39357	8.9545	3.91742	6.69041	21.5472	15.1672	3.74552	0	0	0	0	0	0	0	0	0	0	0	0
643	CCCCC#N	VALERONITRILE	129.209	0	0	0	0	0	0	0	0	0	0	0	0	0	0	0	0	1.51711	4.9035	4.2837	3.99583	8.37891	16.1157	15.4724	15.7348	12.2206	9.5588	8.43676	10.8823	2.7206	0.905962	1.78803	1.0173	2.38378	2.38891	4.90736	5.71862	4.51081	3.36159	1.31988	0	0	0	0	0	0	0
644	CCCCCCCCN	N-OCTYLAMINE	206.335	0	0	0	0	0	0	0	0	0	0	0	0	0	0	0.094095	1.42925	3.00788	1.34588	2.97842	2.59253	2.57937	3.52907	18.866	34.759	39.2988	29.3566	24.9312	17.5399	15.4835	1.85915	1.9138	0.441702	0.341177	0.455632	0.637608	1.42309	0.343676	0.176436	1.16598	0.887881	0.240555	0.579269	0.539783	1.15866	0.506635	0.467082
645	CCCCCCCCCCN	N-DECYLAMINE	250.445	0	0	0	0	0	0	0	0	0	0	0	0	0	0	0.08886	1.41891	3.00759	1.40294	2.87683	2.62073	2.69452	3.44494	20.2309	40.8177	49.5319	37.2115	32.0974	21.1892	19.0266	1.64681	1.66001	0.358696	1.00538	0.775559	0.529876	1.13937	0.719204	0.27233	0.116078	0.574876	1.43905	0.285567	0.817779	0.435635	1.23545	0.378028
646	c1cocn1	OXAZOLE	83.0457	0	0	0	0	0	0	0	0	0	0	0	0	0	0.128309	2.58118	5.02992	4.51621	4.30555	3.52031	3.26331	3.81649	3.191	3.75376	4.51579	5.40374	5.38756	6.47457	7.14834	6.62321	7.8345	3.43236	3.01157	3.00421	1.04587	1.48859	2.07005	1.02639	1.12312	1.6577	0.783129	1.50996	0.301992	0	0	0	0
647	CCCCCCCCCCCCCO	1-TRIDECANOL	310.833	0	0	0	0	0	0	0	0	0	0.269396	0.700334	1.5032	0.078662	0.837938	0.964724	1.25783	0.648801	0.594332	0.705591	1.30026	2.14994	6.07461	22.4167	50.4448	62.5922	47.9413	39.9749	25.2544	22.9713	2.98454	1.11669	1.18453	0.783822	0.563875	1.17461	1.02779	1.45776	1.73065	1.74344	2.39836	2.01054	0.838713	0	0	0	0
648	CC[C@@H](C)CCCC(C)C	2,6-DIMETHYLOCTANE	233.249	0	0	0	0	0	0	0	0	0	0	0	0	0	0	0	0	0	0	0	0	0	1.90545	20.5016	34.0127	48.0183	32.0473	31.4217	31.9794	23.3627	3.19527	0	0	0	0	0	0	0	0	0	0	0	0	0	0	0	0
649	FCF	DIFLUOROMETHANE	54.0343	0	0	0	0	0	0	0	0	0	0	0	0	0	0	0	0.786823	8.13033	4.23628	3.85341	3.39687	2.6619	1.18555	1.8205	1.73939	1.08978	1.43307	2.56828	1.24552	3.77015	10.7304	15.7578	8.62875	0.013104	0	0	0	0	0	0	0	0	0	0	0	0	0
650	O=C1CCCN1	2-PYRROLIDONE	107.78	0	0	0	0	0	0	0	0	0	0	0.337635	1.48182	1.16214	0.840515	1.56914	0.998039	0.266873	0.181015	1.15075	5.74275	12.141	17.5471	15.4142	10.0753	8.36351	8.18987	2.68619	2.49969	1.69938	1.47985	1.57952	1.68541	1.56657	0.708989	1.83356	1.29905	0.878001	2.57665	4.47142	5.25329	3.53273	1.22413	0.065929	0	0	0
651	Cc1ccc(N)cc1	P-TOLUIDINE	147.958	0	0	0	0	0	0	0	0	0	0	0.083111	1.18778	2.9362	1.65105	2.08234	2.29173	2.4659	2.70718	2.58548	4.85244	8.14552	12.642	10.7003	10.9597	7.86748	7.04903	11.5919	10.5702	5.63081	6.10209	6.48573	9.71709	10.9749	8.40887	3.90848	1.2926	0.401002	0	0	0	0	0	0	0	0	0
652	c1cc2c3c(cccc3c1)CC2	ACENAPHTHENE	196.129	0	0	0	0	0	0	0	0	0	0	0	0	0	0	0	0	0	0	0.029364	5.73566	16.287	22.0298	18.6788	16.6662	14.6465	14.0152	11.8207	10.0259	12.329	17.1246	17.8008	12.6395	0.606346	0	0	0	0	0	0	0	0	0	0	0	0	0
653	CC(C)(C)c1ccc(O)cc1	P-TERT-BUTYLPHENOL	207.812	0	0	0	0	0	0	0.143303	0.751075	1.27384	0.556164	0.791886	1.22736	0.903105	0.679149	0.752257	0.843798	0.688661	1.47043	2.72345	6.40681	8.41834	11.5032	19.9096	18.1955	14.0156	13.8564	14.0425	20.3662	12.4145	7.82099	9.50296	8.80036	8.34288	3.86525	0.882847	2.42842	2.65143	0.627061	0	0	0	0	0	0	0	0
654	Nc1ccc(Cl)c(Cl)c1	3,4-DICHLOROANILINE	169.661	0	0	0	0	0	0	0	0	0	0	1.21629	3.01205	2.17043	2.40722	2.14695	2.95318	4.05535	4.70982	5.32011	5.01378	4.70245	5.12369	7.50921	3.7481	3.4257	10.2849	8.77475	11.9046	22.1741	29.7174	21.4744	6.52511	1.0351	1.03859	0.770507	0	0	0	0	0	0	0	0	0	0	0
655	OC[C@@H](Cl)CCl	2,3-DICHLORO-1-PROPANOL	137.129	0	0	0	0	0	0	0	0	0	0	0.020446	0.609875	0.575978	0.381061	1.1765	1.37519	6.7169	10.4869	6.49573	10.0933	5.83566	5.06995	4.24972	6.22724	5.58451	3.28298	9.61999	10.3905	3.74532	7.2222	16.0612	11.3045	5.08244	1.96038	1.01198	1.15837	1.38192	2.59294	2.02647	1.06855	0	0	0	0	0	0
656	c1ccc2c(c1)Cc1ccccc1-2	FLUORENE	211.968	0	0	0	0	0	0	0	0	0	0	0	0	0	0	0	0	0	0	1.2152	13.7192	20.3142	18.0618	18.4205	13.0061	12.3567	11.5885	11.5887	13.7578	17.0735	20.736	17.3356	13.8839	1.86234	0	0	0	0	0	0	0	0	0	0	0	0	0
657	c1ccc2c(c1)[nH]c1ccccc12	DIBENZOPYRROLE	206.96	0	0	0	0	0	0	0	0	0.141242	0.840442	1.80545	0.195413	1.37707	2.76247	0.105691	0.74812	0.674293	0.361898	3.98089	10.4955	16.7951	14.9989	11.7618	11.792	7.83388	11.9961	9.09411	8.27415	24.8587	18.2081	20.7747	15.2329	6.44202	0	0	0	0	0	0	0	0	0	0	0	0	0
658	c1ccc2c(c1)-c1cccc3cccc-2c13	FLUORANTHENE	248.457	0	0	0	0	0	0	0	0	0	0	0	0	0	0	0	0	0	0	4.75189	18.6781	22.916	16.8573	14.3293	9.45288	13.1668	11.7483	13.6052	16.4389	33.9485	35.3957	16.6528	4.34076	0.019349	0	0	0	0	0	0	0	0	0	0	0	0	0
659	CCOC(=O)CC(=O)OCC	DIETHYL_MALONATE	197.86	0	0	0	0	0	0	0	0	0	0	0	0	0	0	0.02898	1.92886	3.87227	3.37387	2.81396	8.5223	21.4592	23.8593	22.7722	18.5067	15.218	15.9895	11.3504	4.02103	4.78616	4.45217	4.01691	5.51548	3.4486	5.73349	3.62051	4.81181	9.22017	4.30083	2.35221	2.02991	0.479567	0	0	0	0	0
660	CCOC(=O)CCC(=O)OCC	DIETHYL_SUCCINATE	219.349	0	0	0	0	0	0	0	0	0	0	0	0	0	0	0	0	0	0.626228	6.02368	12.5076	24.5957	25.4599	25.1947	22.3981	17.9281	18.2608	12.2487	5.13571	3.7134	5.52887	3.4275	5.11292	6.222	4.47826	7.76336	3.47399	9.55559	6.48908	1.03691	0	0	0	0	0	0	0
661	Clc1cccc2ccccc12	1-CHLORONAPHTHALENE	188.685	0	0	0	0	0	0	0	0	0	0	0	0	0	0	0	0	0.052605	1.93735	11.8236	14.0703	12.5647	9.75181	8.81886	8.21984	5.77526	10.6055	11.3725	17.8228	26.6328	25.4857	17.7489	2.31295	0	0	0	0	0	0	0	0	0	0	0	0	0	0
662	FC(Cl)(Cl)Cl	TRICHLOROFLUOROMETHANE	113.604	0	0	0	0	0	0	0	0	0	0	0	0	0	0	0	0	0	0.914625	1.81994	7.27605	0.531952	2.68172	10.4557	4.33332	2.35555	18.8355	29.4871	42.5492	1.89106	0	0	0	0	0	0	0	0	0	0	0	0	0	0	0	0	0
663	CCOC(=O)/C=C\C(=O)OCC	DIETHYL_MALEATE	222.269	0	0	0	0	0	0	0	0	0	0	0	0	0	0	0	0.522457	3.87543	4.65368	3.1302	9.32404	19.3191	24.3337	22.9127	19.8671	13.7274	16.4838	10.6464	8.58999	8.5213	3.57453	3.91171	5.13573	4.86468	5.87089	3.42655	7.28128	10.2817	3.7305	0.572786	0	0	0	0	0	0	0
664	C1CCC(NC2CCCCC2)CC1	DICYCLOHEXYLAMINE	257.885	0	0	0	0	0	0	0	0	0	0	0	0	0	0	0	0.078859	0.423046	1.14277	0.860724	1.11684	1.26634	2.5416	21.9789	41.3328	47.6764	34.1071	32.5473	27.2825	12.7444	2.33424	1.81362	1.26479	0.950848	0.584692	1.21454	0.655714	0.322938	0.414739	0.580436	0.24027	0.467365	0.244775	0.776322	0.298343	0.086865	0
665	CC[C@H](C)[C@H](C)CC	3,4-DIMETHYLHEXANE	187.449	0	0	0	0	0	0	0	0	0	0	0	0	0	0	0	0	0	0	0	0	0	3.72701	18.3559	23.396	36.4084	23.7193	26.8284	31.1787	16.9976	1.92275	0	0	0	0	0	0	0	0	0	0	0	0	0	0	0	0
666	Cc1ccc(C)c(O)c1	2,5-XYLENOL	164.963	0	0	0	0	0	0	0	0.264361	0.594122	1.816	0.301964	0.605398	0.94254	0.855905	0.938531	0.577115	0.327441	0.506668	1.20431	3.86677	10.77	14.2334	16.1982	13.3698	13.2475	11.9375	18.6584	8.95364	7.74379	8.37862	7.97612	8.63141	5.96148	2.0354	1.62106	1.64628	1.65802	1.66191	1.2266	0.174867	0	0	0	0	0	0
667	Cc1ccc(O)cc1C	3,4-XYLENOL	164.262	0	0	0	0	0	0	0.031438	0.679116	1.32244	0.504312	0.758487	1.25636	0.986395	0.565712	0.704951	0.921271	0.616579	1.27363	1.95671	4.54147	11.1699	14.1321	14.729	11.179	10.4888	10.1345	17.7555	9.59751	5.49012	7.98007	9.02094	9.99245	7.57897	4.45089	0.866809	2.38528	2.62345	1.02375	0	0	0	0	0	0	0	0
668	Clc1cccc(Cl)c1	M-DICHLOROBENZENE	155.258	0	0	0	0	0	0	0	0	0	0	0	0	0	0	0	0.196878	2.29113	7.75096	6.87564	6.19792	6.19798	4.95027	8.47025	3.16692	6.04764	15.808	13.717	23.0932	27.1943	24.1672	3.92264	0	0	0	0	0	0	0	0	0	0	0	0	0	0	0
669	c1ccc(-c2ccc(-c3ccccc3)cc2)cc1	P-TERPHENYL	294.603	0	0	0	0	0	0	0	0	0	0	0	0	0	0	0	0	3.94763	6.02828	13.8116	24.1354	20.4928	15.995	14.7769	7.77081	15.0942	14.3972	9.69556	18.9897	23.5499	26.6893	31.6916	23.7305	5.19244	0	0	0	0	0	0	0	0	0	0	0	0	0
670	CC(C)Cc1ccccc1	ISOBUTYLBENZENE	200.137	0	0	0	0	0	0	0	0	0	0	0	0	0	0	0	0	0	0	0.473174	6.4757	10.0998	14.8642	23.1183	22.6167	19.4057	14.552	15.6112	18.8617	15.2978	5.57663	7.93816	9.18154	7.59551	1.5285	0.007925	0	0	0	0	0	0	0	0	0	0	0
671	CC#CC	DIMETHYLACETYLENE	90.1972	0	0	0	0	0	0	0	0	0	0	0	0	0	0	0	0	0	0	0.62678	9.54419	11.5775	9.99689	9.71037	8.12536	13.0571	7.14034	3.94839	6.3494	2.56245	2.09954	4.36523	5.26885	3.13894	8.39686	4.4881	0.016702	0	0	0	0	0	0	0	0	0	0
672	FC(F)(F)C(F)(F)F	HEXAFLUOROETHANE	107.576	0	0	0	0	0	0	0	0	0	0	0	0	0	0	0	0	0.452269	1.11302	1.15849	1.34373	0.762688	1.73796	3.45759	3.95642	12.0206	27.6328	58.4105	7.71967	0	0	0	0	0	0	0	0	0	0	0	0	0	0	0	0	0	0
673	O=CN1CCOCC1	4-FORMYLMORPHOLINE	141.541	0	0	0	0	0	0	0	0	0	0	0	0	0	0	0	0	0	2.55195	8.05814	13.3265	20.5751	18.4078	13.9475	10.242	7.20117	5.35616	4.07553	2.88415	3.60861	2.14463	1.44938	1.56669	1.83486	2.30284	2.29065	2.82741	3.53519	3.75213	8.35615	3.87781	1.45396	0.392818	0	0	0	0
674	FC(F)C(F)(F)F	PENTAFLUOROETHANE	99.6707	0	0	0	0	0	0	0	0	0	0	0	0	0.732848	3.56558	1.25773	2.19794	1.57668	0.672126	1.80636	1.14463	1.5354	2.51026	2.58158	2.16795	3.90559	9.59251	23.0541	30.1963	20.9925	4.21499	0	0	0	0	0	0	0	0	0	0	0	0	0	0	0	0
675	O=C(Cl)c1ccccc1	BENZOYL_CHLORIDE	158.368	0	0	0	0	0	0	0	0	0	0	0	0	0	0	0	0	0	5.19123	10.9429	10.1301	6.46873	7.2077	8.99564	9.32873	8.10415	16.5942	12.4832	14.1872	19.0327	12.6386	5.26272	3.42269	4.96996	4.56459	2.12163	0.68491	0	0	0	0	0	0	0	0	0	0
676	CC1=CC=C(C(C)C)CC1	ALPHA-TERPINENE	204.389	0	0	0	0	0	0	0	0	0	0	0	0	0	0	0	0	0	0	0	0	2.02801	15.6557	28.5982	31.718	23.1216	21.8131	21.3171	18.5586	9.06969	5.27458	4.45778	3.75014	5.07158	5.14364	1.39864	0.021392	0	0	0	0	0	0	0	0	0	0
677	CC(C)(O)C(=O)O	ALPHA-HYDROXYISOBUTYRIC_ACID	127.965	0	0	0	0	0	0.1188	1.18941	0.629581	0.890531	1.72529	0.843541	0.23597	0.176534	0.596507	1.7872	1.36905	0.541649	1.24328	0.770695	2.81069	10.5824	11.3593	11.8504	10.0343	8.26052	13.4219	8.72948	4.83632	5.11015	2.86421	3.33145	3.89963	5.09581	3.32067	5.51381	3.39325	1.8994	2.27538	1.33908	2.23441	0.49187	0	0	0	0	0
678	CC(=O)CO	ACETOL	95.4668	0	0	0	0	0	0	0	0	0	0	0	0	0	0	0.212979	0.720281	0.610163	4.46608	12.1764	11.5386	9.2509	8.10756	7.02255	7.39769	5.5514	3.54934	1.96989	2.23619	3.50945	2.31588	1.01288	1.83378	3.43253	3.64637	4.39291	3.90158	2.82226	4.56462	2.4856	1.78414	0.456812	0	0	0	0	0
679	COCCl	CHLOROMETHYL_METHYL_ETHER	93.8898	0	0	0	0	0	0	0	0	0	0	0	0	0	0	0	0	0.018238	3.21949	7.28238	8.66186	11.4502	8.06058	6.28188	10.223	3.43167	3.74955	6.33061	3.44955	1.40812	6.93426	7.65794	8.07231	4.12452	2.45843	1.14331	1.76653	2.56967	1.94793	0	0	0	0	0	0	0	0
680	CCCCCC(C)C	2-METHYLHEPTANE	190.506	0	0	0	0	0	0	0	0	0	0	0	0	0	0	0	0	0	0	0	0	0	1.07729	15.8248	30.7695	41.7238	28.0972	27.8781	23.9054	21.6869	2.1756	0	0	0	0	0	0	0	0	0	0	0	0	0	0	0	0
681	CCC(C)(C)CC	3,3-DIMETHYLPENTANE	166.647	0	0	0	0	0	0	0	0	0	0	0	0	0	0	0	0	0	0	0	0	0.218787	2.5972	17.0566	26.8603	28.7144	18.6747	20.4878	22.9532	20.9308	2.77122	0	0	0	0	0	0	0	0	0	0	0	0	0	0	0	0
682	CC(C)C#N	ISOBUTYRONITRILE	107.007	0	0	0	0	0	0	0	0	0	0	0	0	0	0	0	0	0.359752	3.14016	2.33386	7.03725	16.521	14.2247	9.1112	8.3088	9.41676	13.2867	3.8081	2.67136	1.74688	1.31855	1.9275	0.975878	2.48694	2.51995	4.82084	5.72009	4.42921	3.31177	1.24893	0	0	0	0	0	0	0
683	CCCCCN	N-PENTYLAMINE	140.37	0	0	0	0	0	0	0	0	0	0	0	0	0	0	0.151482	1.72952	3.15096	1.15813	2.95677	2.5342	2.17836	3.58893	13.1954	23.9055	26.7062	19.461	16.2304	13.7826	8.1408	2.1143	1.13365	0.354577	0.923341	0.676124	0.462472	1.02092	0.579253	0.388293	0.143528	0.455137	1.70721	0.409471	0.539455	0.242127	0.945901	0.249567
684	CCNc1ccccc1	N-ETHYLANILINE	167.493	0	0	0	0	0	0	0	0	0	0	0	0.021823	0.651029	1.07774	0.973905	0.657813	1.45053	1.00651	2.1635	6.42922	13.8692	17.1101	17.8636	15.6119	13.1467	10.5439	12.5084	6.26332	5.36143	8.99613	5.06073	9.78084	9.10529	8.61396	3.2979	0.342508	0.480045	0.91525	0.22493	0	0	0	0	0	0	0
685	NCc1ccccc1	BENZYLAMINE	146.723	0	0	0	0	0	0	0	0	0	0	0	0	0	0	0.761528	2.72912	2.20257	1.80881	3.32735	9.50607	13.4308	14.7707	12.4939	10.3326	10.2829	7.57203	7.15268	5.54243	9.78063	6.99761	9.64917	8.79122	8.5017	2.38755	0.662836	0.626017	0.302248	0.142253	0.914055	1.19166	0.693302	0.640269	0	0.538522	0.550518	0
686	CCOCCOCC	1,2-DIETHOXYETHANE	167.984	0	0	0	0	0	0	0	0	0	0	0	0	0	0	0	0	0	0	0	0.042713	4.3322	24.3901	33.8336	25.8907	20.6149	15.9188	19.8273	9.15174	2.98548	1.90365	1.8613	2.07205	1.02574	1.01195	2.31949	5.74951	3.43425	1.90064	3.64159	0.89962	0	0	0	0	0	0
687	CCCCN(C)C	N,N-DIMETHYL-N-BUTYLAMINE	162.532	0	0	0	0	0	0	0	0	0	0	0	0	0	0	0	0	0	0	0	0	2.74829	10.252	18.1837	23.1607	29.1919	26.55	25.3333	16.5882	6.10844	1.81909	1.08184	1.21146	0.880771	0.297032	0.063795	0.677666	0.438084	0.337845	0.820308	1.52718	0.140219	0.487734	0.564188	0.452721	0	0
688	CCCCCCl	1-CHLOROPENTANE	148.034	0	0	0	0	0	0	0	0	0	0	0	0	0	0	0	0	0	0.190302	2.73317	3.96483	4.09624	8.81774	21.8207	22.732	19.1084	14.4762	11.2826	13.9744	8.177	2.21623	2.51258	11.1341	7.38576	3.02219	0	0	0	0	0	0	0	0	0	0	0	0
689	CCCCCCCCCCCCCCCCCCCCCCCC	N-TETRACOSANE	539.187	0	0	0	0	0	0	0	0	0	0	0	0	0	0	0	0	0	0	0	0	0	0.903681	23.5373	83.0516	124.167	95.65	85.0892	47.4725	50.9598	4.56769	0	0	0	0	0	0	0	0	0	0	0	0	0	0	0	0
690	CC(=O)CCC(C)C	5-METHYL-2-HEXANONE	173.2	0	0	0	0	0	0	0	0	0	0	0	0	0	0	0	0	0	0.009286	1.99547	8.01165	11.3368	11.4404	19.29	24.9019	24.4758	16.9096	13.164	13.1329	9.13675	2.78716	0.460675	0.6686	1.31223	0.895814	2.05466	1.91665	4.53325	3.98584	2.22137	1.74258	0.227489	0	0	0	0	0
691	CCCCC(C)(C)C	2,2-DIMETHYLHEXANE	189.643	0	0	0	0	0	0	0	0	0	0	0	0	0	0	0	0	0	0	0	0	0	1.40927	18.4683	32.0528	37.9001	21.5884	23.2437	22.7743	24.8533	3.53625	0	0	0	0	0	0	0	0	0	0	0	0	0	0	0	0
692	CCCC[C@@H](C)CCC	4-METHYLOCTANE	211.21	0	0	0	0	0	0	0	0	0	0	0	0	0	0	0	0	0	0	0	0	0	1.31723	17.4224	32.8152	44.1166	31.3463	31.302	29.4142	20.8357	2.14026	0	0	0	0	0	0	0	0	0	0	0	0	0	0	0	0
693	CC[C@H](C)CC(C)(C)C	2,2,4-TRIMETHYLHEXANE	210.717	0	0	0	0	0	0	0	0	0	0	0	0	0	0	0	0	0	0	0	0	0.232837	3.41629	20.5099	31.5152	38.909	22.2973	21.1828	26.8898	26.6605	4.13559	0	0	0	0	0	0	0	0	0	0	0	0	0	0	0	0
694	CC(C)CCC(C)C	2,5-DIMETHYLHEXANE	190.186	0	0	0	0	0	0	0	0	0	0	0	0	0	0	0	0	0	0	0	0	0	1.30129	17.7042	29.7664	41.003	23.9083	24.5289	24.5784	22.4711	3.06825	0	0	0	0	0	0	0	0	0	0	0	0	0	0	0	0
695	OCCOCCOCCOCCO	TETRAETHYLENE_GLYCOL	246.119	0	0	0	0	0	0	0	0	0.248346	1.13149	3.52352	0.942339	1.65587	1.53674	2.33101	1.75042	1.47124	2.00964	1.80953	2.85725	21.1983	42.8037	30.3585	18.7488	19.2729	19.7427	8.81628	4.51394	6.15975	5.96868	3.0695	3.01225	2.49813	5.22252	13.0745	8.59445	3.53913	8.88858	5.30988	4.31193	1.36274	0	0	0	0	0
696	CC(C)(C)C(=O)O	NEOPENTANOIC_ACID	139.763	0	0	0	0	0	0	0	0.675861	1.09064	0.044648	1.66753	1.29367	0.640675	0.18564	0.291646	0.498358	1.09625	0.70126	0.376796	0.520866	5.02046	14.5695	16.5358	13.5535	12.2049	12.4278	18.3461	8.67125	3.77787	2.61833	2.23573	2.86739	2.8989	3.86051	1.62125	2.15067	5.9936	2.97935	0.702359	0	0	0	0	0	0	0
697	O=[N+]([O-])c1ccc(Cl)cc1	P-CHLORONITROBENZENE	163.562	0	0	0	0	0	0	0	0	0	0	0	0	0	0	0	0.737598	7.41546	7.82102	5.3145	6.6074	4.53608	8.45744	8.50992	5.84063	17.9032	15.9809	18.3256	12.3786	12.9409	5.19304	4.23172	9.43651	5.10596	3.66075	2.26694	2.50139	2.58493	0.400248	0	0	0	0	0	0	0	0
698	O=[N+]([O-])c1cccc(Cl)c1	M-CHLORONITROBENZENE	163.681	0	0	0	0	0	0	0	0	0	0	0	0	0	0	0	0.533261	5.81838	7.39177	7.37761	6.36437	5.47054	9.30621	6.77463	7.47616	16.7542	15.002	17.3275	10.4532	15.3456	7.77073	5.91417	8.73875	5.13756	2.36632	2.45747	2.82781	1.73459	0.080183	0	0	0	0	0	0	0	0
699	O=[N+]([O-])c1ccccc1Cl	O-CHLORONITROBENZENE	161.873	0	0	0	0	0	0	0	0	0	0	0	0	0	0	0	0.074334	3.21336	9.93533	8.52632	8.07308	6.24205	7.95683	8.00532	6.90423	15.0656	12.1499	13.3575	16.8939	11.8734	4.72108	5.86946	7.62968	7.32986	3.72996	2.11267	2.66534	2.26242	0.329794	0	0	0	0	0	0	0	0
700	CCC/C=C(/C=O)CC	2-ETHYL-2-HEXENAL	186.881	0	0	0	0	0	0	0	0	0	0	0	0	0	0	0	0	0	0	0	1.69836	10.1196	22.4079	26.6053	25.875	23.6561	18.0302	17.0429	14.8684	5.86293	2.89203	1.08289	0.764185	1.38277	0.870048	2.27258	2.72582	3.73841	4.99322	2.27947	1.10913	0.374584	0	0	0	0	0
701	CCOP(=O)(OCC)OCC	TRIETHYL_PHOSPHATE	224.35	0	0	0	0	0	0	0	0	0	0	0	0	0	0	0	0	0	0	0.265329	7.3898	23.1514	28.0439	28.2458	22.4356	19.2773	23.0123	14.3474	5.21562	3.82974	3.72099	3.3017	6.00341	5.60113	3.02029	5.24239	4.26188	0.871332	2.74855	6.16535	2.53863	0.229102	0	0	0	0	0
702	COP(=O)(OC)OC	TRIMETHYL_PHOSPHATE	154.618	0	0	0	0	0	0	0	0	0	0	0	0	0	0	0	0	0	1.06859	8.26389	17.2787	14.5048	15.7333	22.1196	12.7841	8.13703	5.37446	3.85055	5.38239	1.92953	3.27861	3.7534	4.19496	4.46919	4.70309	8.56962	4.8506	0.516285	2.95252	6.16078	0.707725	0	0	0	0	0	0
703	NCCCO	3-AMINO-1-PROPANOL	107.696	0	0	0	0	0	0	0	0	0	0.32514	0.89066	1.30152	0.151412	0.926777	1.3306	3.61062	3.18674	2.42048	3.80733	3.8652	5.67025	12.4864	12.7212	14.0451	10.5124	6.24031	4.10056	2.80983	2.53922	3.85908	1.13432	1.74965	1.37619	1.30401	1.74973	2.12775	2.07152	1.86686	2.04428	3.63508	3.04944	0.774196	0.536878	0.489413	0.702626	0.681142
704	CCC(CC)CO	2-ETHYL-1-BUTANOL	157.93	0	0	0	0	0	0	0	0	0	0.253013	0.527081	1.31982	0.451687	0.820706	1.14729	0.674002	0.423209	0.971645	0.671779	1.67194	1.63312	6.20172	19.1757	23.2679	22.3695	16.6296	16.9816	18.0218	8.65257	2.90594	0.582647	1.16553	0.745283	0.356289	1.2364	1.43769	1.30732	1.52273	1.15198	2.59142	1.31379	0.533254	0	0	0	0
705	C=COCC	ETHYL_VINYL_ETHER	108.234	0	0	0	0	0	0	0	0	0	0	0	0	0	0	0	0	0	0.547751	1.85768	6.23427	13.355	15.4885	12.9078	10.4266	9.2184	8.79263	9.80974	3.69277	3.76458	2.92161	3.0112	4.37301	4.07758	6.64503	3.48595	2.76239	2.19158	0.303986	0	0	0	0	0	0	0	0
706	C=CCCCCCCCCCCCCCCCCCC	1-EICOSENE	449.363	0	0	0	0	0	0	0	0	0	0	0	0	0	0	0	0	0	0	0	0.695222	4.25094	7.76969	27.8303	71.3607	91.5512	72.1522	64.1621	36.3954	37.1214	6.39053	2.39459	2.84654	3.30414	2.06601	2.22801	0.110289	0	0	0	0	0	0	0	0	0	0
707	CCCCCCCC(C)=O	2-NONANONE	216.793	0	0	0	0	0	0	0	0	0	0	0	0	0	0	0	0	0	0.015889	2.03916	7.46915	11.0784	11.0263	18.9421	33.6042	37.4049	27.8615	21.044	16.1686	11.2689	2.28533	0.864272	0.60296	1.24246	0.898473	2.47742	1.16564	4.63176	3.97838	2.23461	1.81274	0.525309	0	0	0	0	0
708	CCCCCCCCCCCCCCCCCCCCC	N-HENEICOSANE	473.961	0	0	0	0	0	0	0	0	0	0	0	0	0	0	0	0	0	0	0	0	0	0.909451	21.3799	73.8582	108.897	83.7804	75.1686	43.1382	45.01	3.93082	0	0	0	0	0	0	0	0	0	0	0	0	0	0	0	0
709	c1cc[nH]c1	PYRROLE	91.4138	0	0	0	0	0	0	0	0	0	1.13909	2.43256	0.390769	1.85309	1.09224	0.673379	0.35219	0.629405	4.07015	5.25383	6.72794	5.65306	5.48236	4.13404	4.4358	6.05018	4.23659	4.25685	5.84103	4.38184	3.56698	4.45439	7.83657	3.77659	4.39329	6.37011	4.0072	2.43582	0.00038	0	0	0	0	0	0	0	0
710	CC1(C)CCCC1	1,1-DIMETHYLCYCLOPENTANE	154.574	0	0	0	0	0	0	0	0	0	0	0	0	0	0	0	0	0	0	0	0	0	0.828564	14.9942	26.1834	30.6067	20.9886	15.4479	19.3498	22.0067	1.64944	0	0	0	0	0	0	0	0	0	0	0	0	0	0	0	0
711	C=COCCCC	BUTYL_VINYL_ETHER	152.061	0	0	0	0	0	0	0	0	0	0	0	0	0	0	0	0	0	0.51218	1.7869	5.50171	9.58419	14.1918	21.6639	20.8104	17.1998	14.0307	13.5617	11.5968	5.83687	2.88175	3.07105	4.41398	3.97152	6.51184	3.6492	2.60304	2.08685	0.446953	0	0	0	0	0	0	0	0
712	CC(c1ccccc1)c1ccccc1	1,1-DIPHENYLETHANE	249.789	0	0	0	0	0	0	0	0	0	0	0	0	0	0	0	0	0	0	1.67623	16.2724	23.1601	24.7352	19.5452	16.5365	15.5296	12.3731	16.7384	10.6364	14.7735	10.2156	17.2142	15.2879	15.3194	2.39659	0	0	0	0	0	0	0	0	0	0	0	0
713	C[C@@H](O)COC[C@@H](C)OC[C@@H](C)O	TRIPROPYLENE_GLYCOL	254.546	0	0	0	0	0	0	0	0	0	0	0	0	0	0	0	0	0	0	0.076106	4.53354	21.1931	37.0133	34.1243	26.984	20.0977	16.3796	20.3998	6.81679	4.64486	4.48924	2.81816	3.98818	3.94029	3.95073	3.73248	3.45422	4.32566	3.90876	3.88697	2.65284	2.35284	0.429158	0	0	0	0
714	CCCCCCCCOCCCCCCCC	DI-N-OCTYL_ETHER	375.84	0	0	0	0	0	0	0	0	0	0	0	0	0	0	0	0	0	0	0	0	0	4.01488	37.6856	71.4774	76.4491	58.0902	44.7341	35.5703	26.5202	2.07218	0.38995	1.39745	1.15132	0.261715	0.557231	1.11076	2.54178	2.19658	0.788298	1.6172	0.815986	0	0	0	0	0
715	CCC[C@H](C)C(C)C	2,3-DIMETHYLHEXANE	188.977	0	0	0	0	0	0	0	0	0	0	0	0	0	0	0	0	0	0	0	0	0	1.60616	18.835	27.8087	37.0548	24.5348	25.744	26.3515	20.2147	2.75394	0	0	0	0	0	0	0	0	0	0	0	0	0	0	0	0
716	FC(F)(F)C(F)(F)C(F)(F)F	OCTAFLUOROPROPANE	146.702	0	0	0	0	0	0	0	0	0	0	0	0	0	0	0	0	0	0	0	0	0.432959	1.42457	2.17108	3.94141	19.777	75.2532	43.964	0.153321	0	0	0	0	0	0	0	0	0	0	0	0	0	0	0	0	0	0
717	ClC(Cl)(Cl)c1ccccc1	BENZOTRICHLORIDE	198.66	0	0	0	0	0	0	0	0	0	0	0	0	0	0	0	0	0	1.86554	9.86592	12.5708	10.6279	11.7644	5.52825	10.163	15.1795	8.02627	13.5594	22.2361	26.3999	34.5751	7.00449	0.047737	0	0	0	0	0	0	0	0	0	0	0	0	0	0
718	COCCOCCOCCO	2-(2-(2-METHOXYETHOXY)ETHOXY)ETHANOL	214.033	0	0	0	0	0	0	0	0	0.105213	0.597419	1.93021	0.566468	0.625173	0.849003	0.830427	1.38662	0.650777	0.826818	0.577723	1.92829	16.5313	40.3768	30.619	19.9705	20.7777	18.8394	8.10439	4.5426	4.25521	5.28851	2.4667	2.81243	2.17588	3.61203	10.3099	7.90419	2.12543	7.48459	4.53903	2.3209	0.648052	0	0	0	0	0
719	FC(F)=C(F)F	TETRAFLUOROETHYLENE	86.122	0	0	0	0	0	0	0	0	0	0	0	0	0	0	0	0	0	0	0	0	1.75442	11.3359	5.72316	4.4609	4.93713	15.5495	33.8959	25.7437	0	0	0	0	0	0	0	0	0	0	0	0	0	0	0	0	0	0
720	CCCc1ccc(C)cc1	1-METHYL-4-N-PROPYLBENZENE	197.256	0	0	0	0	0	0	0	0	0	0	0	0	0	0	0	0	0	0	0	2.90217	9.91806	18.1733	24.8795	23.4173	20.5151	18.0138	21.1535	16.2609	9.0015	7.25799	4.91462	10.5563	6.32981	4.10821	0.342704	0	0	0	0	0	0	0	0	0	0	0
721	FC(F)=C(F)Cl	CHLOROTRIFLUOROETHYLENE	100.171	0	0	0	0	0	0	0	0	0	0	0	0	0	0	0	0	0	0.303744	0.617356	2.43893	1.85006	5.67627	9.94356	7.745	5.57617	15.0514	31.2707	29.6729	4.58064	0	0	0	0	0	0	0	0	0	0	0	0	0	0	0	0	0
722	O=C(C(F)(F)F)C(F)(F)F	HEXAFLUOROACETONE	135.367	0	0	0	0	0	0	0	0	0	0	0	0	0	0.176562	0.817085	1.58986	1.71078	0.513643	1.4541	1.10962	1.77933	4.42582	3.51379	4.48569	12.8011	37.9321	47.6232	6.87545	4.37406	3.52831	3.77129	2.83329	0.159648	0	0	0	0	0	0	0	0	0	0	0	0	0
723	[O][C][S]	CARBONYL_SULFIDE	65.7812	0	0	0	0	0	0	0	0	0	0	0	0	0	0	0	0	0	0	0.605598	2.90395	0.391886	4.32386	13.402	5.94573	7.74936	8.78153	5.62055	18.8157	2.42351	10.0652	1.94351	0	0	0	0	0	0	0	0	0	0	0	0	0	0	0
724	FC(F)(F)I	TRIFLUOROIODOMETHANE	101.838	0	0	0	0	0	0	0	0	0	0	0	0	0	0	0.574032	0.360542	2.98022	0.586028	0	1.05016	3.64047	2.9254	2.01403	3.06731	6.70957	24.6394	38.5489	20.8793	5.78036	0	0	0	0	0	0	0	0	0	0	0	0	0	0	0	0	0
725	OCCCc1ccccc1	3-PHENYL-1-PROPANOL	186.093	0	0	0	0	0	0	0	0	0	0.357958	0.954917	1.24918	0.21289	0.934974	0.96198	1.23816	0.554436	0.60114	1.76992	8.6766	15.2771	25.0551	19.1199	16.093	11.0605	8.73892	10.0647	6.71737	8.42019	7.6117	8.31835	10.1488	8.69307	3.87077	0.9355	1.16185	1.45704	1.58858	1.92572	2.36343	1.82137	0.521889	0	0	0	0
726	CC[C@@H](C)OC(C)=O	SEC-BUTYL_ACETATE	161.835	0	0	0	0	0	0	0	0	0	0	0	0	0	0	0	0	0	0.272355	2.77379	4.65728	8.31522	17.3536	21.2976	22.4593	20.7723	17.7642	14.6774	8.39933	2.53776	1.76225	1.07329	3.0082	3.49347	1.96242	3.52609	2.51535	2.86261	4.79594	1.94055	0.465386	0	0	0	0	0	0
727	CCOC(=O)Cl	ETHYL_CHLOROFORMATE	119.674	0	0	0	0	0	0	0	0	0	0	0	0	0	0	0	0	0	0.75106	5.31779	7.23931	12.6701	14.3269	9.56477	8.19471	9.37231	9.38839	5.17125	9.26831	9.56611	8.59752	5.78001	3.86021	3.96639	6.70045	3.26776	1.14078	0.011223	0	0	0	0	0	0	0	0	0
728	CCOC(=O)CCl	ETHYLCHLOROACETATE	141.08	0	0	0	0	0	0	0	0	0	0	0	0	0	0	0.415049	3.98155	3.99312	2.54177	3.36023	8.68827	11.514	13.4835	12.1312	11.8902	8.11814	10.1344	8.92937	3.98571	3.43979	8.10091	8.80138	8.17424	4.54044	3.77373	2.32813	4.38263	4.21538	1.84899	0.604046	0	0	0	0	0	0	0
729	CCOCCOC(C)=O	2-ETHOXYETHYL_ACETATE	172.723	0	0	0	0	0	0	0	0	0	0	0	0	0	0	0	0	0	0.623304	4.19633	7.94336	14.746	23.0588	21.8942	24.0902	20.3101	10.3539	11.0836	5.70481	3.42764	3.10627	2.56913	4.04875	3.01196	3.46776	4.99905	3.59963	6.55046	4.68654	2.89971	0.120821	0	0	0	0	0	0
730	CNCCO	METHYLETHANOLAMINE	108.581	0	0	0	0	0	0	0	0	0.009803	0.561213	1.11152	1.14385	0.322872	0.868995	1.47376	3.08849	1.40681	1.81864	2.50087	3.10448	6.34128	10.6957	11.9413	13.3529	11.3101	10.3295	9.17705	3.16153	3.38457	2.57298	2.13649	2.00928	0.855046	1.08728	1.28411	2.20816	1.94607	2.35814	3.07824	3.23465	1.7066	0.594563	0.833689	0.367024	0.201371	0.537619
731	C#CCCCCCCCC	1-DECYNE	223.95	0	0	0	0	0	0	0	0	0	0	0	0	0.042163	0.566297	1.36703	1.80817	1.18213	0.231592	1.44143	3.47228	5.17193	6.29381	21.1213	36.7645	36.2832	25.8451	22.9407	20.533	14.6569	3.13393	2.49318	6.35626	4.58035	8.82593	3.27438	0	0	0	0	0	0	0	0	0	0	0
732	C=CCCCCCCCCCCCC	1-TETRADECENE	317.58	0	0	0	0	0	0	0	0	0	0	0	0	0	0	0	0	0	0	0	0.689463	4.24543	7.81277	24.2501	51.4789	61.5148	48.7013	43.1993	27.2724	25.8118	4.77556	2.32537	3.54833	3.33014	1.6744	2.35759	0.107255	0	0	0	0	0	0	0	0	0	0
733	CCCCCCCCCCC(=O)O	N-UNDECANOIC_ACID	271.62	0	0	0	0	0	0.444889	0.941722	0.738327	0.452304	0.57856	1.99891	0.739422	0.090862	0.566248	0.566778	1.81078	1.10523	2.73792	4.10381	3.67711	4.24773	5.25259	21.0366	39.8923	45.686	33.8398	28.3823	19.4584	17.3709	2.477	2.23558	2.7433	1.12543	2.37651	4.39541	6.78989	6.59517	2.90784	2.28861	0.602884	0	0	0	0	0	0
734	CC(C)(CO)CO	NEOPENTYL_GLYCOL	146.654	0	0	0	0	0	0	0	0	0	0.419366	1.3738	2.10788	0.998331	0.595212	1.82414	2.17687	1.77394	1.69822	1.05151	2.69934	8.98722	18.8314	14.8447	11.274	11.2262	8.06719	9.10228	9.23099	5.72977	3.1071	2.94403	2.11134	1.17728	2.51235	1.80124	3.2289	1.45719	3.29596	3.92703	4.37917	2.09051	0.441398	0	0	0	0
735	CCOC(C)(C)C	TERT-BUTYL_ETHYL_ETHER	157.148	0	0	0	0	0	0	0	0	0	0	0	0	0	0	0	0	0	0	0	0	2.01209	17.0992	22.2918	26.3519	17.7157	16.6295	15.9243	22.4894	6.3973	2.20394	0.885704	0.34243	0.316455	1.56174	0.673053	0.58391	1.15255	1.82931	1.82155	1.0918	0.958167	0.133711	0	0	0	0
736	CCF	ETHYL_FLUORIDE	67.1759	0	0	0	0	0	0	0	0	0	0	0	0	0	0	0	0	0	0	0.044478	4.35485	10.5351	10.805	9.45076	7.90164	5.96804	6.41554	4.50122	2.22266	0.851049	1.51494	1.81445	3.0907	5.15744	8.22358	2.65096	0	0	0	0	0	0	0	0	0	0	0
737	CC(F)(F)Cl	1-CHLORO-1,1-DIFLUOROETHANE	98.9739	0	0	0	0	0	0	0	0	0	0	0	0	0	0	0	0	0.680694	5.50421	4.60101	5.54066	4.70119	5.2285	7.2017	3.147	6.63274	5.65691	3.3631	12.2736	23.0311	22.366	1.7676	0	0	0	0	0	0	0	0	0	0	0	0	0	0	0
738	CCCCCCCCCCCCN	N-DODECYLAMINE	293.191	0	0	0	0	0	0	0	0	0	0	0	0	0	0	0.163712	1.76308	3.11736	1.17769	2.95526	2.52778	2.12183	3.52811	17.3328	46.8111	62.2946	47.1511	40.1182	23.2655	22.4857	2.96904	1.17948	0.337105	0.912649	0.592729	0.518702	1.04865	0.493335	0.489904	0.143255	0.40998	1.69529	0.470218	0.512655	0.26426	0.943214	0.254825
739	O=[N+]([O-])[N+](=O)[O-]	NITROGEN_TETROXIDE	83.7967	0	0	0	0	0	0	0	0	0	0	0	0.145886	1.12746	1.20332	2.47605	1.43524	2.07197	2.63235	2.30129	1.33823	4.10701	1.21044	2.99089	3.81793	3.10816	5.67819	11.1942	22.8519	16.7726	9.95384	4.40986	1.84188	0	0	0	0	0	0	0	0	0	0	0	0	0	0
740	FN(F)F	NITROGEN_TRIFLUORIDE	59.8831	0	0	0	0	0	0	0	0	0	0	0	0	0	0	0	0	0	0	0	0	0.672402	3.13021	2.70188	6.72239	11.3173	16.4533	26.553	10.9517	0	0	0	0	0	0	0	0	0	0	0	0	0	0	0	0	0	0
741	c1ccc(COCc2ccccc2)cc1	DIBENZYL_ETHER	260.356	0	0	0	0	0	0	0	0	0	0	0	0	0	0	0	0	0	0	3.56414	20.2095	32.5546	25.9366	19.6072	13.0352	12.6657	13.2489	10.5478	11.5626	15.8688	11.9325	26.5492	15.2572	14.9179	2.78574	1.46958	1.14298	0.177235	0	0	0	0	0	0	0	0	0
742	ClCOCCl	BIS(CHLOROMETHYL)ETHER	116.111	0	0	0	0	0	0	0	0	0	0	0	0	0	0	0	2.94542	6.73134	6.02228	4.52719	7.34421	5.42726	2.85407	2.53097	6.55656	5.443	5.33606	9.75431	9.13603	4.79767	18.2994	14.4724	11.3486	1.3743	1.57852	0.11407	0	0	0	0	0	0	0	0	0	0	0
743	CF	METHYL_FLUORIDE	46.03	0	0	0	0	0	0	0	0	0	0	0	0	0	0	0	0	0	0	2.50014	7.3129	7.31011	5.85036	6.77155	5.28923	2.66153	1.44126	1.97525	0.782274	1.18618	1.30465	1.92102	4.09071	7.85415	6.55722	0.004323	0	0	0	0	0	0	0	0	0	0	0
744	CCCCOC(C)C	ISOPROPYL_BUTYL_ETHER	179.391	0	0	0	0	0	0	0	0	0	0	0	0	0	0	0	0	0	0	0	0	1.16504	12.2501	27.1381	34.0045	26.9126	21.3042	18.7002	23.6953	7.61126	2.1923	0.583597	0.533015	1.29893	0.843203	0.349892	0.820539	2.35347	2.01475	1.20027	0.965141	1.10437	0.032924	0	0	0	0
745	O=C1CCCC(=O)O1	GLUTARIC_ANHYDRIDE	128.275	0	0	0	0	0	0	0	0	0	0	0	0	0	0	0	1.08578	4.63506	8.31192	13.0722	14.4248	11.3371	9.32376	8.52942	5.54827	3.80599	2.61398	2.37023	0.860496	1.93998	2.702	2.46047	3.64596	4.61082	6.3543	13.3495	7.77003	6.77662	1.70125	0.004387	0	0	0	0	0	0	0
746	O=C1CCO1	BETA-PROPIOLACTONE	85.1745	0	0	0	0	0	0	0	0	0	0	0	0	0	0	0	0	0.74747	7.15125	12.9468	9.82684	7.00816	8.44651	6.74794	4.22109	1.75574	2.22805	1.97255	1.35337	2.33336	1.14964	2.3452	3.43515	3.47899	4.14818	6.43031	8.02103	4.10211	1.80816	0.072613	0	0	0	0	0	0	0
747	C[C@H]1CCC(=O)O1	GAMMA-VALEROLACTONE	126.059	0	0	0	0	0	0	0	0	0	0	0	0	0	0	0	0	0	0.863196	4.40061	11.9784	19.2483	17.0182	11.6354	10.8015	10.4726	7.26538	4.05344	2.40269	1.77806	2.06018	1.94898	1.41923	2.21342	2.73433	3.17748	4.95522	7.76372	3.71018	3.27555	0.723559	0	0	0	0	0	0
748	COC(=O)CC#N	METHYL_CYANOACETATE	123.901	0	0	0	0	0	0	0	0	0	0	0	0	0.033451	3.8222	5.40871	3.22847	2.62796	4.31883	10.676	8.10167	6.82707	7.97496	11.1133	5.33192	2.87195	3.26877	5.29361	3.2277	4.00895	3.53435	3.60127	4.30032	6.36204	7.15562	9.01229	9.81153	4.73103	1.47192	0	0	0	0	0	0	0	0
749	C=Cc1ccc(C)cc1	P-METHYLSTYRENE	169.857	0	0	0	0	0	0	0	0	0	0	0	0	0	0	0	0	0	0.304382	3.88752	11.3143	16.9402	15.2153	13.9454	9.99943	10.1634	15.0873	12.6761	9.37888	10.2113	7.69778	15.7599	12.7099	6.3706	2.38275	0.050579	0	0	0	0	0	0	0	0	0	0	0
750	CCc1ccccc1C	O-ETHYLTOLUENE	175.815	0	0	0	0	0	0	0	0	0	0	0	0	0	0	0	0	0	0	0.079412	4.74185	12.7146	19.4568	17.2669	17.9602	13.6614	16.1704	17.5925	12.6559	8.02649	7.51027	5.04176	9.97661	5.97958	4.92414	0.496731	0	0	0	0	0	0	0	0	0	0	0
751	CCc1cccc(C)c1	M-ETHYLTOLUENE	174.408	0	0	0	0	0	0	0	0	0	0	0	0	0	0	0	0	0	0	0.021351	2.75791	10.5161	20.0255	21.2771	20.2149	14.6658	16.3944	16.5973	13.5508	7.94428	6.21918	5.12017	10.391	6.35103	4.63927	0.332402	0	0	0	0	0	0	0	0	0	0	0
752	CCc1ccc(C)cc1	P-ETHYLTOLUENE	175.165	0	0	0	0	0	0	0	0	0	0	0	0	0	0	0	0	0	0	0	2.97992	9.79007	20.5776	20.551	20.4991	15.3934	15.786	18.3737	13.1774	7.42511	7.19229	4.9147	10.5346	6.3233	4.14418	0.320471	0	0	0	0	0	0	0	0	0	0	0
753	Cc1ccc(C)c(C)c1C	1,2,3,4-TETRAMETHYLBENZENE	195.432	0	0	0	0	0	0	0	0	0	0	0	0	0	0	0	0	0	0	0	0.643792	12.0051	22.9956	25.6873	15.6493	14.906	15.5553	26.9218	15.8305	5.97442	7.36921	5.30871	7.01196	6.79374	4.32758	2.01908	0.052934	0	0	0	0	0	0	0	0	0	0
754	Cc1cc(C)c(C)c(C)c1	1,2,3,5-TETRAMETHYLBENZENE	196.488	0	0	0	0	0	0	0	0	0	0	0	0	0	0	0	0	0	0	0	0.367002	11.3534	23.6132	25.183	16.7247	16.1811	15.8429	26.4533	17.0219	7.38017	7.11321	5.43938	7.13118	7.16767	3.97101	1.34186	0.004175	0	0	0	0	0	0	0	0	0	0
755	CCc1c(C)cccc1C	2-ETHYL-M-XYLENE	192.823	0	0	0	0	0	0	0	0	0	0	0	0	0	0	0	0	0	0	0	2.30585	12.8963	20.5974	21.965	19.4383	15.5629	17.9446	19.4673	16.6551	6.75934	6.8298	5.08712	7.8323	6.50674	5.27672	1.80087	0.008398	0	0	0	0	0	0	0	0	0	0
756	CCc1cc(C)ccc1C	2-ETHYL-P-XYLENE	194.842	0	0	0	0	0	0	0	0	0	0	0	0	0	0	0	0	0	0	0	1.49873	12.2205	20.8719	23.163	20.4274	16.0328	16.9034	23.3153	17.8751	6.44917	6.30686	6.06225	7.18143	7.7721	4.39741	1.00633	0	0	0	0	0	0	0	0	0	0	0
757	CCc1cccc(C)c1C	3-ETHYL-O-XYLENE	194.642	0	0	0	0	0	0	0	0	0	0	0	0	0	0	0	0	0	0	0	1.49548	10.767	22.1238	23.6287	20.6265	15.9631	19.819	19.8414	15.5112	5.49777	9.06445	4.4729	8.02623	6.05477	5.34817	1.81999	0.002484	0	0	0	0	0	0	0	0	0	0
758	CCc1ccc(C)c(C)c1	4-ETHYL-O-XYLENE	196.015	0	0	0	0	0	0	0	0	0	0	0	0	0	0	0	0	0	0	0	0.973317	10.8564	21.5806	24.6991	21.1522	17.3144	17.4302	21.6414	18.1641	6.64222	7.05463	5.69345	6.92475	7.87042	4.41706	1.06519	0	0	0	0	0	0	0	0	0	0	0
759	CCc1ccc(C)cc1C	4-ETHYL-M-XYLENE	197.309	0	0	0	0	0	0	0	0	0	0	0	0	0	0	0	0	0	0	0	1.64778	11.8067	20.8962	23.6558	19.9834	16.2567	17.8007	23.9296	17.6772	6.83624	7.05544	5.96912	7.72877	7.20639	4.12751	0.851452	0	0	0	0	0	0	0	0	0	0	0
760	CCc1cc(C)cc(C)c1	5-ETHYL-M-XYLENE	196.131	0	0	0	0	0	0	0	0	0	0	0	0	0	0	0	0	0	0	0	0.445539	9.20675	21.1187	26.7564	22.4583	18.0427	18.3033	22.4477	17.881	7.40427	6.11921	5.92953	7.11424	8.36055	3.39057	1.07436	0	0	0	0	0	0	0	0	0	0	0
761	CCc1cccc(CC)c1	M-DIETHYLBENZENE	195.002	0	0	0	0	0	0	0	0	0	0	0	0	0	0	0	0	0	0	0	1.8747	7.15713	21.191	25.1328	26.2237	18.2067	20.4899	16.1542	16.5825	8.33176	6.44142	4.86836	9.68901	5.88365	5.16684	0.97738	0	0	0	0	0	0	0	0	0	0	0
762	CCc1ccc(CC)cc1	P-DIETHYLBENZENE	194.781	0	0	0	0	0	0	0	0	0	0	0	0	0	0	0	0	0	0	0	1.88658	6.98417	21.33	24.8629	26.155	18.7543	19.2278	17.6866	16.9187	7.24392	7.41462	4.29742	9.56177	6.58793	4.98099	0.630871	0	0	0	0	0	0	0	0	0	0	0
763	Cc1ccccc1C(C)C	O-CYMENE	197.244	0	0	0	0	0	0	0	0	0	0	0	0	0	0	0	0	0	0	0.066382	4.86941	11.659	18.5796	22.3541	20.6372	16.3627	16.2901	17.8813	18.4561	8.72475	8.11807	4.79465	9.56093	5.57315	5.36496	0.66374	0	0	0	0	0	0	0	0	0	0	0
764	Cc1cccc(C(C)C)c1	M-CYMENE	195.695	0	0	0	0	0	0	0	0	0	0	0	0	0	0	0	0	0	0	0.199404	4.20589	11.8976	17.9599	22.0735	20.7619	18.0837	18.7675	17.6959	17.9045	9.72819	6.65107	5.65551	9.68517	6.14018	4.47363	0.55167	0	0	0	0	0	0	0	0	0	0	0
765	CCCc1ccccc1C	1-METHYL-2-N-PROPYLBENZENE	198.423	0	0	0	0	0	0	0	0	0	0	0	0	0	0	0	0	0	0	0.076228	4.5933	11.5607	18.1603	22.4068	21.6155	18.8481	16.7807	19.5196	17.3198	8.86198	7.50689	5.0227	10.0198	5.8944	5.04016	0.611818	0	0	0	0	0	0	0	0	0	0	0
766	CCCc1cccc(C)c1	1-METHYL-3-N-PROPYLBENZENE	196.598	0	0	0	0	0	0	0	0	0	0	0	0	0	0	0	0	0	0	0.039504	2.85869	10.504	16.8338	25.9515	23.9853	19.9077	17.909	19.3998	17.1483	8.94329	6.48527	5.73749	8.9799	7.54045	4.30391	0.339959	0	0	0	0	0	0	0	0	0	0	0
767	Cc1cc(C)c(C)c(C)c1C	PENTAMETHYLBENZENE	215.921	0	0	0	0	0	0	0	0	0	0	0	0	0	0	0	0	0	0	0	0.009327	8.80687	25.941	26.6518	20.1721	17.639	17.1556	31.5615	17.3886	8.71016	5.40838	7.39226	4.58355	7.25662	3.97227	2.02661	0.263717	0	0	0	0	0	0	0	0	0	0
768	Cc1ccc2cc(C)ccc2c1	2,6-DIMETHYLNAPHTHALENE	211.163	0	0	0	0	0	0	0	0	0	0	0	0	0	0	0	0	0	0	1.56712	11.1146	19.8014	19.0226	19.7257	13.9449	12.2344	15.8002	20.3719	10.9005	8.8196	10.2106	21.6384	17.6116	3.6182	0	0	0	0	0	0	0	0	0	0	0	0	0
769	Cc1ccc2ccc(C)cc2c1	2,7-DIMETHYLNAPHTHALENE	210.799	0	0	0	0	0	0	0	0	0	0	0	0	0	0	0	0	0	0	1.37879	10.927	20.1368	19.9161	20.068	12.6062	12.1551	17.3867	18.7008	10.1051	9.78308	10.3415	21.4115	17.4651	3.93463	0	0	0	0	0	0	0	0	0	0	0	0	0
770	CCc1ccc2ccccc2c1	2-ETHYLNAPHTHALENE	209.898	0	0	0	0	0	0	0	0	0	0	0	0	0	0	0	0	0	0	2.66299	13.4717	14.8952	20.0673	17.7934	16.344	14.2123	14.2192	13.6528	13.5296	10.1587	11.268	21.7142	16.3691	3.9869	0	0	0	0	0	0	0	0	0	0	0	0	0
771	CC1=CCCC1	1-METHYLCYCLOPENTENE	125.466	0	0	0	0	0	0	0	0	0	0	0	0	0	0	0	0	0	0	0	0	1.43424	8.01465	17.6359	20.858	18.799	14.1324	19.1655	16.2501	5.21665	3.35345	2.35485	3.22615	1.84083	1.94183	0.792632	0.163215	0	0	0	0	0	0	0	0	0	0
772	C[C@@H]1C=CCC1	3-METHYLCYCLOPENTENE	125.229	0	0	0	0	0	0	0	0	0	0	0	0	0	0	0	0	0	0	0	0.57698	3.15771	6.74719	17.3629	19.484	19.2237	16.7015	14.4787	15.7836	5.42274	3.23987	3.4878	1.9512	2.68979	1.94575	1.34711	0.18924	0	0	0	0	0	0	0	0	0	0
773	C[C@@H]1CCC[C@@H](C)C1	TRANS-1,3-DIMETHYLCYCLOHEXANE	172.947	0	0	0	0	0	0	0	0	0	0	0	0	0	0	0	0	0	0	0	0	0	0.663158	12.8893	27.5828	35.0918	26.6507	22.8796	21.7479	17.5964	1.81533	0	0	0	0	0	0	0	0	0	0	0	0	0	0	0	0
774	C[C@H]1CCC[C@@H](C)C1	CIS-1,3-DIMETHYLCYCLOHEXANE	171.971	0	0	0	0	0	0	0	0	0	0	0	0	0	0	0	0	0	0	0	0	0.177088	2.17714	11.1578	25.5995	33.9392	27.4935	21.9535	22.2249	17.2277	1.21081	0	0	0	0	0	0	0	0	0	0	0	0	0	0	0	0
775	C[C@H]1CC[C@@H](C)CC1	CIS-1,4-DIMETHYLCYCLOHEXANE	172.881	0	0	0	0	0	0	0	0	0	0	0	0	0	0	0	0	0	0	0	0	0	0.649706	12.5117	28.2786	35.3256	26.2525	22.6604	21.5152	17.9699	1.73779	0	0	0	0	0	0	0	0	0	0	0	0	0	0	0	0
776	CCCC1CCCCC1	N-PROPYLCYCLOHEXANE	193.557	0	0	0	0	0	0	0	0	0	0	0	0	0	0	0	0	0	0	0	0	0	0.421092	10.9858	31.0345	41.4166	32.6965	29.994	25.5942	15.7396	0.943003	0	0	0	0	0	0	0	0	0	0	0	0	0	0	0	0
777	CCc1ccc(O)cc1	P-ETHYLPHENOL	163.609	0	0	0	0	0	0	0.08552	0.699238	1.32082	0.592842	0.7617	1.22919	0.956265	0.651585	0.753223	0.893262	0.646219	1.46087	2.2308	6.0142	7.08004	13.9086	13.761	15.5226	10.3484	13.07	11.9846	8.90881	9.8682	6.68686	9.51858	10.5068	8.01691	3.67691	0.855663	2.43315	2.61849	0.708918	0	0	0	0	0	0	0	0
778	CCc1ccccc1O	O-ETHYLPHENOL	165.005	0	0	0	0	0	0	0.132533	0.575861	1.43799	0.713434	0.353131	1.20717	1.05521	0.864856	0.776008	0.817607	0.774215	1.46738	1.7857	5.79487	8.26997	11.983	11.8195	14.2266	10.6885	13.022	12.9985	12.5467	9.89573	8.8777	8.01879	9.12387	8.07579	6.29429	1.94998	1.10611	0.393781	0	0	0	0	0	0	0	0	0
779	CC(C)c1cccc(C(C)C)c1	M-DIISOPROPYLBENZENE	242.358	0	0	0	0	0	0	0	0	0	0	0	0	0	0	0	0	0	0	0.085602	3.62893	7.53119	23.0402	25.9843	29.1715	23.4664	22.7259	19.0039	29.6554	12.3875	5.41636	7.08655	8.14325	6.02652	4.90259	0.497122	0	0	0	0	0	0	0	0	0	0	0
780	c1cc2ccc3cccc4ccc(c1)c2c34	PYRENE	244.075	0	0	0	0	0	0	0	0	0	0	0	0	0	0	0	0	0	0	3.88198	19.4006	23.2078	14.7009	13.9229	8.48084	12.2058	11.0556	9.62954	21.5689	35.9186	37.1062	15.4927	0.110616	0	0	0	0	0	0	0	0	0	0	0	0	0	0
781	c1ccc2c(c1)ccc1c3ccccc3ccc21	CHRYSENE	277.702	0	0	0	0	0	0	0	0	0	0	0	0	0	0	0	0	0.718271	3.50121	4.78361	23.1233	20.0162	17.6376	13.5035	11.641	9.95741	15.8241	13.1561	17.8805	42.5183	37.1112	22.6522	1.6575	0	0	0	0	0	0	0	0	0	0	0	0	0	0
782	c1ccc(-c2ccccc2-c2ccccc2)cc1	O-TERPHENYL	302.017	0	0	0	0	0	0	0	0	0	0	0	0	0	0	0	0	0	0	4.82537	23.8937	26.8607	24.1875	18.5936	15.5504	13.8486	15.9726	13.1848	17.6727	19.3548	17.8936	24.7045	20.6468	10.7837	0.339326	0	0	0	0	0	0	0	0	0	0	0	0
783	CC1(C)CCCCC1	1,1-DIMETHYLCYCLOHEXANE	171.509	0	0	0	0	0	0	0	0	0	0	0	0	0	0	0	0	0	0	0	0	0	0.76728	13.9117	28.8662	33.7504	21.8148	20.8666	21.8202	19.1217	2.186	0	0	0	0	0	0	0	0	0	0	0	0	0	0	0	0
784	C[C@H]1CCCC[C@@H]1C	TRANS-1,2-DIMETHYLCYCLOHEXANE	172.404	0	0	0	0	0	0	0	0	0	0	0	0	0	0	0	0	0	0	0	0	0	1.25438	11.305	26.9598	36.1181	27.353	23.1289	22.3876	16.3993	1.6443	0	0	0	0	0	0	0	0	0	0	0	0	0	0	0	0
785	C[C@H]1C=Cc2ccccc21	1-METHYLINDENE	177.414	0	0	0	0	0	0	0	0	0	0	0	0	0	0	0	0	0	0	2.07234	10.8947	15.8315	18.2178	16.5623	12.2092	12.3426	9.20697	15.2316	8.59468	9.20774	9.11915	11.8199	12.6529	8.65612	2.81334	0	0	0	0	0	0	0	0	0	0	0	0
786	CC1=Cc2ccccc2C1	2-METHYLINDENE	177.372	0	0	0	0	0	0	0	0	0	0	0	0	0	0	0	0	0	0	0.99526	10.0188	16.1244	20.3182	18.0933	13.5293	11.9839	13.37	11.4378	7.82167	9.16172	8.97541	9.45276	14.2535	7.65783	4.94404	0.255363	0	0	0	0	0	0	0	0	0	0	0
787	c1cnccn1	PYRAZINE	100.446	0	0	0	0	0	0	0	0	0	0	0	0	0	0	0	0	0.362966	9.73214	11.5137	6.53349	4.3825	3.90069	5.63277	4.21303	8.08111	13.9178	8.99223	5.0311	5.04878	1.82268	1.28699	4.01376	2.42588	1.36737	2.54761	3.21401	1.72905	1.36939	1.81269	2.3223	1.12615	0.436201	0	0	0	0
788	Cn1cccc1	N-METHYLPYRROLE	114.294	0	0	0	0	0	0	0	0	0	0	0	0	0	0	0	0	0	2.00037	6.63329	12.7787	11.3573	9.66097	9.08892	11.3637	7.73034	5.40905	4.36387	4.72288	5.86074	3.27253	4.54103	6.2893	3.84017	4.33082	5.68136	3.95312	2.85327	0.037865	0	0	0	0	0	0	0	0
789	CC(=O)OCC(COC(C)=O)OC(C)=O	GLYCERYL_TRIACETATE	264.283	0	0	0	0	0	0	0	0	0	0	0	0	0	0	0	0	0.030802	6.84609	17.9565	22.297	24.5657	19.5294	19.6345	28.7158	21.7924	8.07596	8.37718	4.59438	6.22518	6.89285	5.95256	5.74776	5.84042	9.16748	6.48642	12.8403	12.2487	6.08189	1.10963	0	0	0	0	0	0	0
790	c1ccc2[nH]ccc2c1	INDOLE	148.843	0	0	0	0	0	0	0	0	0.187561	1.49154	1.65761	0.770901	1.60797	1.63957	0.292618	0.768901	2.29321	2.88811	5.59493	7.7781	10.816	10.3031	8.26066	8.3957	5.96943	7.61235	6.19337	6.23121	6.41391	11.991	9.30056	12.1393	12.3457	9.64179	1.58956	0	0	0	0	0	0	0	0	0	0	0
791	CCc1ccccc1N	O-ETHYLANILINE	166.418	0	0	0	0	0	0	0	0	0	0	0.001853	0.580455	1.371	1.609	1.69742	1.39967	2.35152	2.04107	2.41186	4.57586	11.3025	14.3232	16.4034	13.6926	13.1604	10.2	10.2688	8.03449	4.52977	6.65691	7.33622	8.14937	9.88395	7.8452	6.18701	1.72476	0.202328	0	0	0	0	0	0	0	0	0
792	c1ccc2nc3ccccc3cc2c1	ACRIDINE	218.559	0	0	0	0	0	0	0	0	0	0	0	0	0	0	0	0	0	0.997869	8.57765	18.8797	16.9339	14.787	9.32635	10.8625	9.4087	11.382	20.6748	27.9559	21.8723	23.6825	4.91568	1.07444	0.363073	1.33581	1.30539	1.07225	1.6676	1.55411	1.0678	0.306839	0.774615	0.645809	0.096457	0	0	0
793	Oc1ccc(O)cc1	P-HYDROQUINONE	132.619	0	0	0	0	0	0	0.243653	1.29902	2.87163	1.18846	1.30991	2.30886	2.00632	1.48431	1.87419	1.49208	1.70683	3.84568	5.02895	8.28281	6.44726	5.25027	4.36866	4.80597	2.93515	6.23163	4.19557	6.04146	8.69336	8.29281	13.9191	12.2088	5.58267	3.99991	1.87766	4.80022	5.04638	2.03318	0	0	0	0	0	0	0	0
794	CCc1cccc(O)c1	M-ETHYLPHENOL	163.558	0	0	0	0	0	0	0.065236	0.72069	1.31607	0.597359	0.723678	1.3002	0.914505	0.692333	0.705604	0.947937	0.72407	1.38773	1.96152	4.80772	8.36852	15.0877	13.91	14.7782	11.4656	12.6046	10.6649	9.45694	7.70357	7.82645	9.14607	11.1031	7.13939	4.97693	0.78831	2.38842	2.62127	0.665025	0	0	0	0	0	0	0	0
795	OCCc1ccccc1	2-PHENYLETHANOL	163.556	0	0	0	0	0	0	0	0	0	0.29525	1.13669	0.982259	0.596214	0.855048	1.20006	0.968222	0.53182	1.28127	1.73421	8.85854	15.711	17.3482	14.4444	11.7241	10.6111	7.5694	8.08826	6.11164	10.601	7.21767	8.94107	8.86798	8.67413	4.65867	1.10233	1.01092	0.924784	1.15041	1.29193	1.72212	0.800172	0.304814	0	0	0	0
796	Oc1cccc(O)c1O	1,2,3-BENZENETRIOL	141.502	0	0	0	0	0	0	0.336392	1.40546	1.93375	1.06933	2.84556	3.60209	2.03387	1.37001	1.45228	2.32191	1.09794	1.14359	4.0073	6.48541	6.65834	4.48511	5.87087	4.55357	6.30752	6.36924	10.1319	7.26046	10.7403	8.88655	9.96099	11.3919	7.39046	4.383	4.0743	4.59119	3.79909	0.238934	0	0	0	0	0	0	0	0
797	Cc1cc2ccccc2o1	2-METHYLBENZOFURAN	165.797	0	0	0	0	0	0	0	0	0	0	0	0	0	0	0	0	7.8e-05	1.26505	5.70886	14.6808	13.7269	13.7258	11.2515	9.73276	13.6276	10.0022	7.28248	8.53398	13.2958	11.6243	14.4618	11.0281	8.36737	2.15098	0.075318	0	0	0	0	0	0	0	0	0	0	0
798	c1ccc2c(c1)oc1ccccc12	DIBENZOFURAN	203.205	0	0	0	0	0	0	0	0	0	0	0	0	0	0	0	0	0	0.965258	6.81342	15.6707	16.0122	13.9112	11.1677	7.12095	11.6376	12.1132	12.0911	24.9401	19.9528	21.9137	15.55	5.42726	1.9643	1.16528	0	0	0	0	0	0	0	0	0	0	0	0
799	CCc1ccc(CC)c(CC)c1	1,2,4-TRIETHYLBENZENE	240.054	0	0	0	0	0	0	0	0	0	0	0	0	0	0	0	0	0	0	0	0.796385	4.41287	22.2441	30.073	32.8881	23.7861	25.306	23.5804	24.5953	7.93821	6.63364	5.77326	6.05832	6.82282	5.16672	1.51435	0	0	0	0	0	0	0	0	0	0	0
800	CCc1cc(CC)cc(CC)c1	1,3,5-TRIETHYLBENZENE	234.835	0	0	0	0	0	0	0	0	0	0	0	0	0	0	0	0	0	0	0	0.140344	3.09022	21.8467	30.588	34.151	26.3166	26.8612	20.4762	24.0548	8.93097	5.86618	4.58991	6.88356	7.70592	4.34753	1.57383	0.008448	0	0	0	0	0	0	0	0	0	0
801	C1=CCOC1	2,5-DIHYDROFURAN	93.2467	0	0	0	0	0	0	0	0	0	0	0	0	0	0	0	0	0	0.417622	3.55732	3.85513	10.8839	13.5681	14.1781	9.16882	6.78277	6.3561	4.5958	4.25439	6.01802	3.2177	4.68535	3.08282	1.65456	2.01924	1.24547	1.00865	1.43947	2.0687	1.49316	2.04846	0.116131	0	0	0	0	0
802	C1=Cc2cccc3cccc1c23	ACENAPHTHALENE	191.001	0	0	0	0	0	0	0	0	0	0	0	0	0	0	0	0	0	0	4.36944	15.1252	17.8637	14.4558	11.3379	8.64341	10.2259	9.82781	13.38	10.2188	17.3037	30.6349	18.8797	3.16429	0.776949	0	0	0	0	0	0	0	0	0	0	0	0	0
803	C=C(C)C(C)(C)C	2,3,3-TRIMETHYL-1-BUTENE	161.267	0	0	0	0	0	0	0	0	0	0	0	0	0	0	0	0	0	0	0	0.018572	3.10134	12.8791	22.7077	21.7004	16.5221	15.0826	16.4071	21.8803	10.4373	3.37957	3.56	2.58441	2.25589	2.97268	1.42504	0.050202	0	0	0	0	0	0	0	0	0	0
804	CC(F)(F)C(F)(F)F	1,1,1,2,2-PENTAFLUOROPROPANE	122.817	0	0	0	0	0	0	0	0	0	0	0	0	0	0	0	0	0.9336	4.72159	5.44351	4.91085	4.17078	4.02479	6.0921	2.58537	6.73019	7.43258	22.1649	32.4552	17.7193	10.1075	0.180971	0	0	0	0	0	0	0	0	0	0	0	0	0	0	0
805	C=Cc1cccc(C=C)c1	M-DIVINYLBENZENE	185.606	0	0	0	0	0	0	0	0	0	0	0	0	0	0	0	0	0	2.09584	10.1371	16.4318	15.6668	12.3362	9.35707	9.70956	9.10774	10.4843	11.4721	14.3983	7.29743	19.8461	19.6924	11.6159	6.07619	1.93006	0	0	0	0	0	0	0	0	0	0	0	0
806	CCCCCC#N	HEXANENITRILE	151.097	0	0	0	0	0	0	0	0	0	0	0	0	0	0	0	0	1.46942	4.88377	4.19001	4.05182	8.20064	14.1445	18.6246	19.7445	18.2639	11.3209	11.2283	13.1655	4.6706	0.943629	1.79541	1.03191	2.35523	2.44536	4.84825	5.73028	4.50675	3.37224	1.31135	0	0	0	0	0	0	0
807	N#CCC#N	MALONONITRILE	90.3298	0	0	0	0	0	0	0	0	0	0	0.056128	6.33811	6.71217	2.61042	3.52514	2.7986	4.20509	1.55556	0.559604	2.46973	5.36031	1.64279	1.00545	3.17477	6.42623	4.47176	0.890045	2.89605	2.64035	3.24379	3.47863	7.09469	7.69207	10.9173	7.24499	6.31583	3.22991	0.016694	0	0	0	0	0	0	0	0
808	CCOC(=O)OCC	DIETHYL_CARBONATE	150.077	0	0	0	0	0	0	0	0	0	0	0	0	0	0	0	0	0	0	0.049754	8.11214	17.145	21.9031	19.4564	18.3557	12.4112	15.6508	9.35816	3.47048	2.33179	3.89474	1.99475	2.91101	4.45832	3.2856	7.22091	4.0032	5.63922	3.01297	0.036095	0	0	0	0	0	0	0
809	COC(=O)c1ccccc1C(=O)OC	DIMETHYL_PHTHALATE	231.581	0	0	0	0	0	0	0	0	0	0	0	0	0	0	0	0	0	5.00309	15.5508	18.558	14.8576	15.7178	19.707	17.6141	11.2613	9.37612	8.1864	15.7288	15.4213	10.8448	3.9598	6.72244	3.37687	4.01341	4.0073	6.77057	8.84605	3.70907	0.720166	0	0	0	0	0	0	0
810	O=C1OCCO1	ETHYLENE_CARBONATE	94.8234	0	0	0	0	0	0	0	0	0	0	0	0	0	0	0	0	0.028777	12.3222	18.8927	7.28475	7.62544	5.09861	3.60943	2.65874	2.14216	1.98856	2.55607	3.52474	1.57159	2.20782	4.82016	3.38937	4.72903	7.43163	2.95663	7.63307	4.76108	2.7287	0.174688	0	0	0	0	0	0	0
811	O=C(O)CCCCCCCCC(=O)O	SEBACIC_ACID	266.171	0	0	0	0	0	0	0	0.813095	2.61902	0.241161	2.86258	2.55902	1.69278	0.472265	0.55889	0.728779	2.43139	1.51885	2.50539	10.1727	7.84993	11.1534	25.7573	40.1811	33.9074	23.0266	14.3887	10.2918	7.93598	5.05794	7.04507	4.99319	2.21168	10.4615	5.87953	8.95826	11.0407	4.58156	0.470815	0	0	0	0	0	0	0
812	OC[C@H](O)CCl	3-CHLORO-1,2-PROPANEDIOL	125.74	0	0	0	0	0	0	0	0	0.398328	1.1884	1.48172	0.278298	0.933298	1.90954	1.25455	1.66827	1.51082	4.26308	6.14462	11.5551	12.1646	7.7775	6.42426	6.0052	5.42135	1.73757	4.89715	6.88586	3.82591	2.67669	11.919	7.86812	5.91771	2.80601	3.67076	1.79873	2.43954	2.86509	3.84592	1.9288	0.280807	0	0	0	0	0
813	CCCOC(=O)c1ccccc1C(=O)OCCC	DI-N-PROPYL_PHTHALATE	319.971	0	0	0	0	0	0	0	0	0	0	0	0	0	0	0	0	0	2.92477	8.59333	10.6024	14.3387	30.7322	33.1708	36.7592	23.4377	25.86	24.2406	21.1856	17.2478	9.85625	5.0754	4.68622	6.16905	4.84269	4.33733	5.3768	8.61699	3.47632	0.764161	0	0	0	0	0	0	0
814	CC(C)COC(=O)c1ccccc1C(=O)OCC(C)C	DIISOBUTYL_PHTHALATE	362.74	0	0	0	0	0	0	0	0	0	0	0	0	0	0	0	0	0	0.381985	6.51135	11.1505	13.3631	26.967	42.5602	40.274	30.5816	30.1051	31.9089	36.2354	18.9644	7.25471	2.66995	2.10174	1.89407	3.01614	5.57539	6.75107	9.49302	3.06678	0.450196	0	0	0	0	0	0	0
815	O=[N+]([O-])c1cc([N+](=O)[O-])cc([N+](=O)[O-])c1	1,3,5-TRINITROBENZENE	203.19	0	0	0	0	0	0	0	0	0	0	0	0	0	0	0	1.37577	8.62255	7.12753	11.345	21.8034	25.0878	7.76891	2.25306	1.71529	4.59989	5.27356	9.32104	7.93023	8.03119	19.5222	24.4963	12.3387	7.31324	9.07903	8.05809	1.07149	0	0	0	0	0	0	0	0	0	0
816	COC(=O)/C=C\C(=O)OC	DIMETHYL_MALEATE	176.427	0	0	0	0	0	0	0	0	0	0	0	0	0	0	0	0.525593	4.26092	5.9441	9.84403	14.2498	12.0995	13.3178	19.2991	12.7856	9.01074	6.42988	4.86823	11.1608	7.05129	3.48355	3.8008	5.37554	4.68554	5.56424	2.98136	8.92692	8.84722	3.38827	0.392674	0	0	0	0	0	0	0
817	NCCNCCNCCN	TRIETHYLENETETRAMINE	209.823	0	0	0	0	0	0	0	0	0	0	0	0	0	0	1.30234	6.56111	7.26423	6.67488	7.87476	7.31424	8.50695	16.2791	23.2289	29.7152	20.9657	13.806	13.9641	5.85561	6.71667	5.75724	1.84165	2.35404	3.24846	1.50254	1.77426	3.54441	2.70615	0.338306	1.23888	4.97116	4.3406	1.25241	1.54509	2.00183	1.77272	2.06479
818	C[C@H](C#N)CCC#N	METHYLGLUTARONITRILE	155.292	0	0	0	0	0	0	0	0	0	0	0	0	0	0	0	1.19428	10.2523	9.22317	12.5052	13.6857	12.7841	8.62234	7.55341	9.28918	7.5263	3.88268	5.79775	4.15604	2.57	2.81683	2.87591	3.87897	4.78159	9.59698	10.6109	8.81871	7.25495	4.02892	0.19401	0	0	0	0	0	0	0
819	CCCCC(=O)OCC	ETHYL-PENTANOATE	183.067	0	0	0	0	0	0	0	0	0	0	0	0	0	0	0	0	0	0	0.075234	3.39252	10.7771	16.0031	26.2652	28.0415	26.1382	19.8557	16.7327	12.6961	4.05694	2.78676	2.03579	2.31912	3.06262	2.71502	3.25592	2.40563	5.75194	3.02376	0.935203	0.011567	0	0	0	0	0	0
820	CCCCCC(=O)OCC	ETHYL-HEXANOATE	204.774	0	0	0	0	0	0	0	0	0	0	0	0	0	0	0	0	0	0	0.046171	3.27637	10.8794	15.713	25.9836	32.8323	31.4481	23.8984	19.0145	15.0932	5.62943	2.78032	2.00999	2.26631	3.15845	2.69413	3.19123	2.46278	5.7481	2.9973	0.966748	0.015563	0	0	0	0	0	0
821	CCCCCCCC(=O)OCC	ETHYL-OCTANOATE	248.334	0	0	0	0	0	0	0	0	0	0	0	0	0	0	0	0	0	0	0.092152	3.39391	10.5814	15.7158	26.4432	39.6318	41.8907	33.1759	24.7299	18.5969	9.45251	2.75971	2.03473	2.27631	3.13374	2.64932	3.25273	2.45748	5.74285	3.13541	0.863261	0	0	0	0	0	0	0
822	CCCCCCCCC(=O)OCC	ETHYL-NONANOATE	270.79	0	0	0	0	0	0	0	0	0	0	0	0	0	0	0	0	0	0	0.088	3.38245	10.608	15.6245	27.0035	42.4547	47.3706	37.6876	28.1167	20.0102	11.2841	2.78704	2.01686	2.26774	3.13635	2.64484	3.25966	2.46294	5.7386	3.14316	0.881293	0	0	0	0	0	0	0
823	CCCCCCCCCC(=O)OCC	ETHYL-DECANOATE	292.145	0	0	0	0	0	0	0	0	0	0	0	0	0	0	0	0	0	0	0.079403	3.33227	10.9171	15.3863	27.0509	45.7293	52.793	41.8329	31.1906	21.7629	13.2088	2.76338	2.04578	2.30968	3.14494	2.88052	3.21346	2.28285	5.70233	3.00935	0.985013	0.024595	0	0	0	0	0	0
824	CCCCCCCCCCC(=O)OCC	ETHYL-UNDECANOATE	314.217	0	0	0	0	0	0	0	0	0	0	0	0	0	0	0	0	0	0	0.079917	3.33348	10.7865	15.6959	27.0978	48.7483	58.3624	46.0363	34.8375	23.2979	14.9324	2.80275	2.04011	2.28857	3.13818	2.83626	3.16363	2.3525	5.60529	3.05473	1.03587	0.023752	0	0	0	0	0	0
825	CCCCCCCCCCCC(=O)OCC	ETHYL-DODECANOATE	336.188	0	0	0	0	0	0	0	0	0	0	0	0	0	0	0	0	0	0	0.079332	3.34571	10.6988	15.6103	27.801	51.9581	63.0109	50.6277	38.379	24.7831	16.7052	2.79034	2.01961	2.27053	3.16378	2.74083	3.26068	2.34577	5.80338	2.9882	0.964503	0.01698	0	0	0	0	0	0
826	CCCCCCCCCCCCCC(=O)OCC	ETHYL-TETRADECANOATE	379.709	0	0	0	0	0	0	0	0	0	0	0	0	0	0	0	0	0	0	0.0835	3.37724	10.6937	15.7151	28.3543	58.0995	73.5552	59.2437	45.2416	27.7885	20.393	2.81859	2.00863	2.23329	3.1514	2.71962	3.24916	2.41188	5.80333	2.99178	0.96786	0.017094	0	0	0	0	0	0
827	CCCCCCCCCCCCCCCC(=O)OCC	ETHYL-HEXADECANOATE	423.752	0	0	0	0	0	0	0	0	0	0	0	0	0	0	0	0	0	0	0.083845	3.38045	10.7029	15.7134	29.0512	64.3091	83.8995	68.1679	52.1261	30.8481	24.0657	2.81995	2.00547	2.23716	3.15072	2.72048	3.24452	2.41645	5.79925	2.99304	0.970447	0.017016	0	0	0	0	0	0
828	COCCOC(C)=O	2-METHOXYACETATE-ETHANOL	152.333	0	0	0	0	0	0	0	0	0	0	0	0	0	0	0	0	0	0	3.52431	10.5449	20.0521	22.1918	16.2196	19.0753	17.6221	7.37979	3.36243	3.43875	2.71849	2.84951	2.37101	3.61843	2.58241	3.68217	5.77224	4.87096	6.71851	5.02057	2.69991	0.013291	0	0	0	0	0	0
829	OC1CCCC1	CYCLOPENTANOL	120.685	0	0	0	0	0	0	0	0	0	0.144041	0.572504	1.53143	0.34288	0.523172	1.26339	0.859388	0.708307	0.652076	0.405981	0.467881	0.751905	3.37654	17.5139	22.9	19.1613	12.8483	12.7201	14.3651	2.2513	1.15359	0.90303	0.268567	0.731864	1.04267	1.71985	1.06459	2.01811	1.3166	1.37793	2.472	1.46893	0.256972	0	0	0	0
830	C1CC[C@@H]2CCC[C@H]2C1	HEXAHYDROINDAN	179.295	0	0	0	0	0	0	0	0	0	0	0	0	0	0	0	0	0	0	0	0	0	0	6.25575	28.1858	39.7771	35.7122	27.2842	20.1528	14.4143	0	0	0	0	0	0	0	0	0	0	0	0	0	0	0	0	0
831	CCN(CC)C(C)=O	N,N-DIETHYL-ACETAMIDE	167.662	0	0	0	0	0	0	0	0	0	0	0	0	0	0	0	0	0	0	0.593051	5.70015	13.1968	20.7237	18.7108	21.7407	17.4446	17.8901	16.8354	11.1549	2.42124	1.6406	0.880377	0.274549	0.722527	0.368069	0.281374	2.02793	1.32271	2.73644	2.21345	5.55108	2.5663	1.22111	0.010556	0	0	0
832	ClC1CCCCC1	CHLOROCYCLOHEXANE	150.921	0	0	0	0	0	0	0	0	0	0	0	0	0	0	0	0	0	0	0.227189	2.01852	2.11325	9.4315	24.9079	25.3503	19.185	18.5844	11.0041	6.68064	5.13506	2.2248	2.70146	10.6273	7.83127	2.98017	0	0	0	0	0	0	0	0	0	0	0	0
833	CC(=O)OC[C@@H](CO)OC(C)=O	DIACETIN	213.317	0	0	0	0	0	0	0	0	0	0.610088	1.30053	1.32225	0.39853	0.480384	1.18326	1.12774	1.18241	1.98878	11.3606	19.5729	22.3804	16.6771	14.8917	23.1808	17.7879	6.06221	4.25947	3.90683	4.1521	2.74513	2.90694	4.29914	5.05117	6.47619	6.08671	9.15243	11.995	6.97355	2.74596	1.20873	0.894908	0.007132	0	0	0	0
834	CO[C@H]1CO[C@@H]2[C@H](OC)CO[C@H]12	DIMETHYL-ISOSORBIDE	209.477	0	0	0	0	0	0	0	0	0	0	0	0	0	0	0	0	0	0	0.539913	12.0267	28.8157	30.0474	21.2313	22.1339	17.7009	7.94785	5.73769	6.39929	4.59208	3.20722	3.25294	3.51613	2.65911	3.90994	6.18908	3.87122	5.37359	5.7889	4.44603	3.06649	0.537331	0	0	0	0	0
835	CCN(C=O)CC	N,N-DIETHYLFORMAMIDE	147.009	0	0	0	0	0	0	0	0	0	0	0	0	0	0	0	0	0	0	2.35574	6.83037	11.2989	18.8197	18.0586	19.0816	14.6966	13.3495	17.0397	6.05225	2.71136	1.18761	0.143376	0.228923	0.924662	0.973119	1.3242	1.11	2.23957	2.2792	5.50383	3.99941	1.73221	0.477406	0	0	0	0
836	CCCCOC(=O)[C@@H](C)O	N-BUTYL-LACTATE	193.985	0	0	0	0	0	0	0	0	0	0	0	0	0	0	0.387916	0.827868	0.331544	0.658932	1.90029	6.27415	10.6523	17.2432	30.1262	25.5933	20.956	19.5281	13.6813	11.3069	6.26916	3.47044	2.50569	3.9249	4.93443	2.52541	4.90344	3.65989	2.78965	2.65368	2.16297	1.49315	0.129712	0	0	0	0	0
837	OCC(F)(F)F	2,2,2-TRIFLUOROETHANOL	94.4385	0	0	0	0	0	0	0	0.140663	1.05039	1.9012	0.739651	0.581001	0.773718	1.58388	1.32447	0.705331	1.37965	6.34286	5.4666	4.31751	2.60987	1.29143	1.40192	1.69527	2.49401	3.23257	4.26866	15.4447	28.3277	7.64849	1.61444	3.02673	0.715368	0.554377	1.61009	2.9751	2.35588	1.44938	0.173827	0	0	0	0	0	0	0
838	COC(=O)CCCCC(=O)OC	DIMETHYL-ADIPATE	221.879	0	0	0	0	0	0	0	0	0	0	0	0	0	0	0	0	0	0	2.58384	17.2816	21.2623	25.227	32.185	29.4239	15.9619	10.4203	7.25794	4.46022	4.58674	5.42112	3.78741	5.7796	5.28829	5.74115	6.63927	5.58251	10.9866	5.20942	0.974559	0	0	0	0	0	0	0
839	CCOC(=O)CCCCC(=O)OCC	DIETHYL-ADIPATE	262.94	0	0	0	0	0	0	0	0	0	0	0	0	0	0	0	0	0	0	0.573013	8.31258	22.6545	34.5701	40.7945	33.311	23.8815	22.2665	15.5703	4.99854	4.84735	4.86888	4.20788	5.04092	5.67718	5.84727	6.14492	4.98212	11.0013	6.11007	1.55263	0	0	0	0	0	0	0
840	CCCCOC(=O)C(=O)OCCCC	DIBUTYL-OXALATE	263.734	0	0	0	0	0	0	0	0	0	0	0	0	0	0	0	0	0	0.610482	3.22158	8.12013	14.3439	22.0274	43.0971	36.8102	27.5261	22.7315	20.7355	17.1025	4.56591	3.12192	4.19878	4.2028	4.2642	5.51557	10.7793	8.52283	4.16597	2.51112	0.394889	0	0	0	0	0	0	0
841	CO[C@@H](C)CCO	3-METHOXY-1-BUTANOL	148.69	0	0	0	0	0	0	0	0	0	0.217577	0.722157	1.89232	0.367257	0.549559	1.00721	0.768681	1.16436	0.861796	0.96608	0.543728	3.86248	17.6255	24.6661	20.575	16.0742	11.2465	12.6887	9.29313	3.40492	2.63381	1.47671	2.35679	1.79113	1.16165	1.22171	3.79284	3.71191	1.67823	3.03292	3.65005	1.30029	0.03985	0	0	0	0
842	CC(C)CCC[C@H](C)CCO	3,7-DIMETHYL-1-OCTANOL	244.738	0	0	0	0	0	0	0	0	0	0.2151	0.678622	1.91308	0.392507	0.473788	0.983874	1.08359	0.914032	0.495239	0.946282	0.676977	0.834696	5.13385	22.379	38.2771	45.8487	30.1668	27.3568	24.846	16.6941	1.48431	0.6353	1.3544	1.17141	0.534343	0.732135	0.674071	2.60693	1.59968	1.66544	2.39179	1.90367	0.21806	0	0	0	0
843	CCCCCCCl	1-CHLOROHEXANE	170.255	0	0	0	0	0	0	0	0	0	0	0	0	0	0	0	0	0	0	1.60532	4.17243	4.1369	6.86931	21.0578	27.9612	27.6547	18.4139	14.0932	17.3863	8.43633	1.45684	4.62671	10.464	8.20924	0.746905	0	0	0	0	0	0	0	0	0	0	0	0
844	CCCCCCCCCl	1-CHLOROOCTANE	214.486	0	0	0	0	0	0	0	0	0	0	0	0	0	0	0	0	0	0	1.59123	4.48074	3.83621	6.71354	21.341	34.9036	38.0821	27.6521	19.7387	20.8178	12.1959	1.49703	4.67054	10.4511	8.21605	0.717741	0	0	0	0	0	0	0	0	0	0	0	0
845	CCCCCCCCCCCCCCCl	1-CHLOROTETRADECANE	347.455	0	0	0	0	0	0	0	0	0	0	0	0	0	0	0	0	0	0	1.63345	4.15643	4.08226	6.72973	23.3584	53.68	69.7357	54.1621	40.0887	29.7678	23.5243	1.51107	4.60668	10.4875	8.21626	0.750712	0	0	0	0	0	0	0	0	0	0	0	0
846	C1CCC1	CYCLOBUTANE	90.1905	0	0	0	0	0	0	0	0	0	0	0	0	0	0	0	0	0	0	0	0	0	1.2931	12.6812	14.8557	17.738	17.5354	10.0801	15.201	14.2697	1.08312	0	0	0	0	0	0	0	0	0	0	0	0	0	0	0	0
847	CCCCCCCOC(=O)c1ccccc1C(=O)OCCCCCCC	DI-N-HEPTYL_PHTHALATE	492.35	0	0	0	0	0	0	0	0	0	0	0	0	0	0	0	0	0	0.497613	5.86068	11.7154	14.5359	21.3577	48.8312	70.3322	70.3006	53.7436	43.1196	46.8538	29.9188	4.03305	3.29791	3.62651	4.7934	4.54842	6.69892	6.86612	10.1112	2.55713	0.085793	0	0	0	0	0	0	0
848	NCCCN	1,3-PROPANEDIAMINE	112.982	0	0	0	0	0	0	0	0	0	0	0	0	0	0	0.380089	3.59263	5.94226	2.83792	6.06402	5.0333	4.68992	9.10441	15.733	16.0092	12.7808	7.75451	6.04984	3.27659	2.01727	2.89032	2.05176	0.704114	2.16344	1.39823	0.887011	1.951	1.28275	0.633478	0.389735	1.46354	2.72129	0.608484	1.46892	0.86922	1.96098	0.620944
849	CCCCCCOC(=O)CCCCC(=O)OCCCCCC	DIHEXYL_ADIPATE	437.401	0	0	0	0	0	0	0	0	0	0	0	0	0	0	0	0	0	0	1.57636	9.31951	15.102	30.3126	58.9026	70.2509	61.2442	42.6	34.6239	28.8112	17.1706	4.92696	4.48017	4.76075	6.03464	4.93321	5.70741	5.69202	8.08054	9.26047	2.36394	0.071442	0	0	0	0	0	0
850	CCCCCCCCCCc1ccccc1	N-DECYLBENZENE	331.599	0	0	0	0	0	0	0	0	0	0	0	0	0	0	0	0	0	0	0	3.88221	9.09235	13.3035	21.81	46.1713	58.1375	44.9268	38.0229	28.5127	23.7422	7.49169	10.5336	8.83897	3.8947	0.339252	0	0	0	0	0	0	0	0	0	0	0	0
851	CCCCCCCCCCCCc1ccccc1	N-DODECYLBENZENE	370.924	0	0	0	0	0	0	0	0	0	0	0	0	0	0	0	0	0	0	0.374755	6.39457	9.4813	14.5846	26.6042	54.5683	61.3175	49.4069	43.0299	26.7186	28.7521	7.27588	7.21163	9.15708	8.10909	3.5566	0.086123	0	0	0	0	0	0	0	0	0	0	0
852	CCCCCCCCCCCCCCc1ccccc1	N-TETRADECYLBENZENE	414.049	0	0	0	0	0	0	0	0	0	0	0	0	0	0	0	0	0	0	0	3.89784	9.13856	13.1489	23.0924	59.4262	78.2487	62.6887	51.4877	34.5783	31.2269	7.79871	10.3821	8.75135	3.92297	0.39593	0	0	0	0	0	0	0	0	0	0	0	0
853	CCCCCCCCCCCCCCCc1ccccc1	N-PENTADECYLBENZENE	441.481	0	0	0	0	0	0	0	0	0	0	0	0	0	0	0	0	0	0	0	3.82391	9.24082	13.2603	23.4039	61.9448	83.7946	66.9463	55.9156	35.5386	32.9925	7.91661	10.6925	8.90332	3.74653	0.179018	0	0	0	0	0	0	0	0	0	0	0	0
854	CCCCOC(=O)/C=C/C(=O)OCCCC	DIBUTYL_MALEATE	299.738	0	0	0	0	0	0	0	0	0	0	0	0	0	0	0	0	0	1.18639	2.66558	6.1127	9.34375	23.9959	47.7153	47.6846	36.3902	29.8219	22.8435	19.0212	6.66851	4.79646	4.53871	5.86615	5.47895	7.083	3.70371	8.12143	9.18283	1.01886	0	0	0	0	0	0	0	0
855	COC(=O)CC(C)=O	METHYL_ACETOACETATE	146.195	0	0	0	0	0	0	0	0	0	0	0	0	0	0	0	0.077296	1.3376	5.36411	9.17653	12.7001	13.4295	13.9932	14.9055	13.9598	11.2013	6.59546	1.85436	2.64396	3.176	2.79702	3.89897	4.12496	4.80445	5.27126	4.89134	7.21269	7.41527	3.38086	1.19166	0.056835	0	0	0	0	0	0
856	O=C(O)CCCCCC(=O)O	PIMELIC_ACID	199.802	0	0	0	0	0	0	0	0.909867	2.57719	0.318565	2.83894	2.60146	1.57564	0.454107	0.558162	0.874074	2.34262	1.49769	2.99311	10.4922	8.66577	13.1572	25.6168	23.6527	16.9507	8.61835	8.78546	2.01942	7.04959	4.92665	7.15377	4.72945	2.46685	10.3577	5.74373	9.14407	10.8489	4.32687	0.422896	0	0	0	0	0	0	0
857	CCCCC[C@H](C)O	2-HEPTANOL	180.309	0	0	0	0	0	0	0	0	0	0.092723	0.412301	1.07528	0.456819	0.809994	0.801945	1.34038	0.862029	0.335022	0.316524	1.63825	1.9196	9.43448	17.8644	28.3385	28.5555	21.5384	22.669	19.1313	11.7457	1.36245	1.63402	1.22465	1.0884	0.400903	0.692225	1.02643	1.72114	1.39803	1.43697	1.61441	1.85771	0.911309	0.001239	0	0	0
858	CC(C)(C)C(C)(C)C	2,2,3,3-TETRAMETHYLBUTANE	186.49	0	0	0	0	0	0	0	0	0	0	0	0	0	0	0	0	0	0	0	0	0	4.26813	25.094	22.3935	29.9099	17.4874	18.0087	19.1844	29.3541	4.43647	0	0	0	0	0	0	0	0	0	0	0	0	0	0	0	0
859	C=C[C@H](C)CC	3-METHYL-1-PENTENE	139.815	0	0	0	0	0	0	0	0	0	0	0	0	0	0	0	0	0	0	0	0.423076	3.58993	9.94988	20.6469	21.5873	17.2126	15.3087	15.7812	16.6356	8.56365	3.56356	2.08771	2.86254	3.09413	2.29767	2.00569	0.410798	0	0	0	0	0	0	0	0	0	0
860	CCC(CC)CC	3-ETHYLPENTANE	168.232	0	0	0	0	0	0	0	0	0	0	0	0	0	0	0	0	0	0	0	0	0	1.35138	14.8089	25.3556	33.5186	24.6819	23.7845	25.4468	16.4969	1.15757	0	0	0	0	0	0	0	0	0	0	0	0	0	0	0	0
861	CCCCC1CCCCC1	N-BUTYLCYCLOHEXANE	214.73	0	0	0	0	0	0	0	0	0	0	0	0	0	0	0	0	0	0	0	0	0	0.45639	11.2612	34.8425	46.2634	36.55	32.8806	27.0092	17.8788	1.13997	0	0	0	0	0	0	0	0	0	0	0	0	0	0	0	0
862	C#Cc1ccccc1	ETHYNYLBENZENE	142.838	0	0	0	0	0	0	0	0	0	0	0	0	0.525006	1.32948	2.00829	1.10302	0.453371	1.75835	9.32455	11.3136	9.10747	7.87495	8.98952	5.5805	4.05358	6.41799	10.5562	8.88427	13.1001	15.7923	17.7431	9.11959	6.73447	0.430412	0	0	0	0	0	0	0	0	0	0	0	0
863	C/C=C/C=C/C	TRANS,TRANS-2,4-HEXADIENE	134.218	0	0	0	0	0	0	0	0	0	0	0	0	0	0	0	0	0	0	0	0.457883	9.85903	17.5334	21.4403	12.8073	13.1928	13.3307	16.578	9.65333	6.67736	7.2135	4.95256	4.16412	6.68375	4.93526	0.212466	0	0	0	0	0	0	0	0	0	0	0
864	C#CCC	ETHYLACETYLENE	92.1183	0	0	0	0	0	0	0	0	0	0	0	0	0.04102	0.56744	1.38672	1.81624	1.15438	0.262763	1.62193	4.80352	7.01886	9.00424	9.49698	12.7246	7.16069	4.99143	9.36176	6.3296	3.54375	2.65748	2.54552	6.39054	4.66577	8.73746	2.99976	0	0	0	0	0	0	0	0	0	0	0
865	C=C=CC	1,2-BUTADIENE	90.7754	0	0	0	0	0	0	0	0	0	0	0	0	0	0	0	0	0	0.169626	3.15321	5.06948	9.86917	8.07731	9.73137	8.60823	7.95833	8.7798	9.83933	5.32037	4.24695	7.61969	6.72993	8.97451	4.06114	1.04613	0	0	0	0	0	0	0	0	0	0	0	0
866	C#CC	METHYLACETYLENE	70.4095	0	0	0	0	0	0	0	0	0	0	0	0	0.038005	0.570455	1.4328	1.8262	1.09834	0.429951	5.3383	5.98917	6.79018	4.73851	4.07157	9.6649	4.83195	2.88148	2.64829	5.37795	2.8126	3.64302	1.80928	7.33595	4.39332	8.41057	3.11147	0	0	0	0	0	0	0	0	0	0	0
867	FC(Cl)(Cl)C(F)(Cl)Cl	1,1,2,2-TETRACHLORODIFLUOROETHANE	165.183	0	0	0	0	0	0	0	0	0	0	0	0	0	0	0	0	0	1.05166	2.33609	9.45487	1.21414	3.43007	13.7491	5.77234	1.68067	24.5422	37.2398	56.7657	1.98733	0	0	0	0	0	0	0	0	0	0	0	0	0	0	0	0	0
868	Cc1ccc([N+](=O)[O-])cc1[N+](=O)[O-]	2,4-DINITROTOLUENE	193.552	0	0	0	0	0	0	0	0	0	0	0	0	0	0	0	0.58745	4.35431	7.13544	11.0345	9.34802	11.8327	11.8258	14.2405	21.7893	13.4215	7.53723	8.89612	3.84199	5.76606	5.92717	13.6039	14.062	10.1746	4.36151	4.79204	5.89386	2.01857	0.008473	0	0	0	0	0	0	0	0
869	O=[N+]([O-])c1ccc(Cl)c([N+](=O)[O-])c1	1-CHLORO-2,4-DINITROBENZENE	194.377	0	0	0	0	0	0	0	0	0	0	0	0	0	0	0.118386	3.92643	6.12966	6.81047	5.80903	7.85967	9.68397	12.8853	20.2558	13.0744	8.97788	8.45528	11.1629	9.62032	6.3143	8.22857	18.4341	14.0077	6.80474	5.71766	5.42706	3.18205	0.228422	0	0	0	0	0	0	0	0	0
870	Cc1c([N+](=O)[O-])cc([N+](=O)[O-])cc1[N+](=O)[O-]	2,4,6-TRINITROTOLUENE	224.303	0	0	0	0	0	0	0	0	0	0	0	0	0	0	0.46517	4.05013	7.34408	7.13795	10.0207	14.5075	19.2038	18.0152	10.9468	7.46328	5.30431	5.8203	5.51568	7.7861	9.14645	16.7704	26.9929	14.5786	7.63489	8.82445	7.81999	1.6421	0	0	0	0	0	0	0	0	0	0
871	CN(C)c1ccc(C=O)cc1	P-DIMETHYLAMINOBENZALDEHYDE	195.016	0	0	0	0	0	0	0	0	0	0	0	0	0	0	0	0	0.068085	2.84563	8.00562	16.0437	21.2006	16.9546	12.225	17.2692	13.9826	8.45358	8.08788	6.81572	12.8836	10.2591	10.1949	6.96977	1.12464	1.0499	1.19782	2.64944	2.68182	5.28545	3.68678	2.32828	0.65305	0.080565	0	0	0	0
872	C/C=C/CC	TRANS-2-PENTENE	118.198	0	0	0	0	0	0	0	0	0	0	0	0	0	0	0	0	0	0	0	0	1.14665	11.4495	18.3498	19.9512	14.8156	14.5198	16.0566	14.9024	6.60771	3.34619	3.49099	2.88551	3.04611	1.94262	0.851881	0	0	0	0	0	0	0	0	0	0	0
873	CCOC	METHYL_ETHYL_ETHER	92.4061	0	0	0	0	0	0	0	0	0	0	0	0	0	0	0	0	0	0	0	0.929957	3.18588	12.6875	19.0862	15.4995	14.7307	11.5579	9.28523	5.57147	1.84067	1.44391	1.2065	1.44382	1.04228	0.70555	0.786337	1.34222	2.22683	1.44023	1.43203	2.12106	0.174416	0	0	0	0	0
874	CC[C@H](C)C(C)(C)C	2,2,3-TRIMETHYLPENTANE	187.692	0	0	0	0	0	0	0	0	0	0	0	0	0	0	0	0	0	0	0	0	0	2.81108	21.5487	25.4398	34.1826	19.0054	22.0489	25.3105	22.6389	3.72165	0	0	0	0	0	0	0	0	0	0	0	0	0	0	0	0
875	C=C=C	PROPADIENE	69.8223	0	0	0	0	0	0	0	0	0	0	0	0	0	0	0	0	0	2.7708	6.77654	7.59175	4.98746	3.62481	4.42737	4.67763	5.0311	5.35375	5.81809	3.43161	6.44927	7.10257	10.4239	5.56811	4.1074	0.726852	0	0	0	0	0	0	0	0	0	0	0	0
876	CCCCCOC=O	N-PENTYL_FORMATE	163.325	0	0	0	0	0	0	0	0	0	0	0	0	0	0	0	0.025787	2.66438	2.72405	1.7008	4.1026	6.17314	11.4861	23.4902	25.3737	20.5849	15.7698	13.1539	11.8781	5.3935	2.49095	1.94621	3.10125	2.5417	2.95941	2.95059	4.42353	4.94421	2.62137	0.646328	0	0	0	0	0	0	0
877	CCCCCCCCOC=O	N-OCTYL_FORMATE	229.431	0	0	0	0	0	0	0	0	0	0	0	0	0	0	0	0.022071	2.63405	2.73691	1.69659	4.14326	6.04869	11.0794	25.0042	36.884	35.4509	27.8708	21.9305	16.4705	11.9427	2.74456	1.97396	3.13357	2.53388	3.06219	2.87725	4.63025	4.8341	2.54979	0.638728	0	0	0	0	0	0	0
878	CCCCOCCOCCOCCCC	DIETHYLENE_GLYCOL_DI-N-BUTYL_ETHER	309.86	0	0	0	0	0	0	0	0	0	0	0	0	0	0	0	0	0	0	0	0	4.74957	29.9581	53.2989	50.6974	45.1696	33.5731	26.1752	25.5827	9.04839	3.7833	2.42348	2.02537	1.53581	2.17987	5.35181	7.56691	4.06663	3.59816	4.30764	0.358992	0	0	0	0	0	0
879	CC[C@H]1CO1	1,2-EPOXYBUTANE	106.063	0	0	0	0	0	0	0	0	0	0	0	0	0	0	0	0	0	0	1.05269	5.44537	7.56647	13.3551	14.9686	16.1544	10.8361	10.792	10.6842	7.38742	1.5075	0.851711	2.35531	0.799324	0.751002	1.67255	1.89346	2.64722	4.00094	2.38937	1.756	0.668304	0	0	0	0	0	0
880	ON=C1CCCCC1	CYCLOHEXANONE_OXIME	149.327	0	0	0	0	0	0	0	0	0.486549	1.05932	1.34763	0.324257	0.867921	0.843236	1.11073	0.503413	0.478831	0.57159	0.30832	0.948289	4.50901	12.5349	22.2464	20.7801	16.6576	16.6966	11.3469	7.17226	1.9231	2.49842	1.8983	1.40861	2.41764	4.02781	5.67278	3.96526	2.8235	2.11904	0.986903	1.33082	0.774127	0.022058	0	0	0	0
881	O=[N+]([O-])c1cccc(C(F)(F)F)c1	3-NITROBENZOTRIFLUORIDE	187.239	0	0	0	0	0	0	0	0	0	0	0	0	0	0	0	0.270147	3.72999	7.51976	9.35062	5.49796	6.81091	7.93033	7.72879	16.5916	17.3456	13.3047	16.0502	21.1918	22.2131	3.32498	6.72805	8.5942	4.55662	2.4103	2.50984	3.0488	0.674456	0	0	0	0	0	0	0	0	0
882	CCCCCCCN	N-HEPTYLAMINE	183.967	0	0	0	0	0	0	0	0	0	0	0	0	0	0	0.15464	1.74111	3.15283	1.16403	2.94353	2.55733	2.14218	3.46476	14.3556	30.743	36.6316	27.5974	22.9771	15.9042	12.8016	2.1178	1.15635	0.334234	0.911018	0.586363	0.52466	1.04828	0.48199	0.496172	0.144439	0.408539	1.70062	0.457301	0.515472	0.276348	0.922547	0.270306
883	CCCCCCCCCN	N-NONYLAMINE	227.744	0	0	0	0	0	0	0	0	0	0	0	0	0	0	0.152702	1.74192	3.10861	1.17485	2.98662	2.49977	2.16039	3.52851	15.6137	37.2746	47.0383	35.1226	29.7853	19.0653	16.6242	2.5533	1.17665	0.33178	0.923075	0.662899	0.511205	0.991537	0.540513	0.414367	0.148144	0.528801	1.65478	0.389602	0.449221	0.379619	0.949501	0.349102
884	CCCCCCCCCCCN	UNDECYLAMINE	271.352	0	0	0	0	0	0	0	0	0	0	0	0	0	0	0.160176	1.74714	3.11458	1.15074	2.96873	2.51425	2.1697	3.51735	16.7483	43.7119	57.2989	43.0097	36.7081	21.999	20.5238	2.87653	1.10152	0.400416	0.925609	0.681113	0.441191	1.03865	0.5827	0.392568	0.142498	0.433417	1.71792	0.422431	0.54731	0.225849	0.963831	0.240599
885	CC(C)=CC(C)(C)C	2,4,4-TRIMETHYL-2-PENTENE	182.639	0	0	0	0	0	0	0	0	0	0	0	0	0	0	0	0	0	0	0	0	1.47474	11.5745	24.0723	26.2596	22.74	17.3647	20.0415	23.8769	15.1806	3.38461	3.57502	3.07068	2.05506	1.64095	0.654813	0	0	0	0	0	0	0	0	0	0	0
886	CCCCCCCCCC=O	DECANAL	240.196	0	0	0	0	0	0	0	0	0	0	0	0	0	0	0	0	0	0	1.02546	6.84342	9.73499	12.5737	23.1354	36.2348	40.507	30.9911	26.0987	17.4352	14.1903	1.33916	1.19317	0.90562	2.25937	1.57215	2.05537	4.65131	3.96089	2.6864	2.11667	0.540856	0	0	0	0	0	0
887	FC(F)(F)C(F)(Cl)Cl	1,1-DICHLOROTETRAFLUOROETHANE	137.25	0	0	0	0	0	0	0	0	0	0	0	0	0	0	0	0	0	0.814329	2.16491	4.04914	0.000639	4.94404	6.5028	2.07841	6.62962	31.9134	64.0621	16.7891	0	0	0	0	0	0	0	0	0	0	0	0	0	0	0	0	0	0
888	COC(=O)C(C)C	METHYL_ISOBUTYRATE	140.189	0	0	0	0	0	0	0	0	0	0	0	0	0	0	0	0	0	0.078595	2.30259	7.85498	8.0941	15.1794	18.6285	19.4118	14.358	10.1786	13.3266	9.80764	3.12173	2.85292	2.29137	2.92556	3.33504	1.60828	2.19345	1.61498	3.98565	4.89857	1.13073	0	0	0	0	0	0	0
889	O=[N+]([O-])c1cc(C(F)(F)F)ccc1Cl	4-CHLORO-3-NITROBENZOTRIFLUORIDE	206.663	0	0	0	0	0	0	0	0	0	0	0	0	0	0	0.56964	3.85305	4.63802	5.09909	5.74491	5.70747	6.5387	6.78157	10.7659	20.2415	15.3827	12.4574	19.2973	32.1183	19.2924	5.37305	6.25156	8.39312	4.38924	2.38417	2.35346	3.01103	0.628025	0	0	0	0	0	0	0	0	0
890	CCCC(=O)OC(=O)CCC	BUTYRIC_ANHYDRIDE	209.483	0	0	0	0	0	0	0	0	0	0	0	0	0	0	0	0	0	1.5379	7.59805	7.27611	10.6569	20.7261	28.6555	26.9555	17.1284	18.3625	16.7122	16.0879	3.96777	2.97131	3.13057	4.21046	2.54137	2.90037	7.67068	10.1128	5.63103	1.08739	0	0	0	0	0	0	0	0
891	CC(C)(O)c1ccccc1	2-PHENYL-2-PROPANOL	185.92	0	0	0	0	0	0	0	0	0.036811	0.396625	1.01726	0.678414	0.666801	0.981968	0.715328	0.865706	0.507127	1.43195	2.8974	10.4873	14.3523	14.9686	15.3664	11.4414	11.3285	11.0391	17.0912	8.43247	8.60614	7.51382	11.6042	8.39011	8.89353	2.43632	0.866794	1.34615	2.27026	2.00719	0.730914	0.900201	0.271975	0	0	0	0	0
892	C[C@H](O)CNC[C@H](C)O	DIISOPROPANOLAMINE	184.539	0	0	0	0	0	0	0	0	0.013039	0.476187	0.99499	1.32847	0.246932	0.638125	1.21575	1.20332	1.38847	1.51237	2.31879	2.46188	8.41839	20.9725	27.4053	22.853	15.069	15.1562	16.0086	10.6317	4.31173	2.43316	3.28227	2.30089	2.25915	3.492	2.8265	2.68214	1.74052	2.20174	3.08113	2.88822	3.29319	1.81279	0.347764	0	0	0
893	C=C(F)F	1,1-DIFLUOROETHYLENE	70.0423	0	0	0	0	0	0	0	0	0	0	0	0	0	0	0	0.314596	1.9178	4.13096	3.21132	1.37812	2.79068	1.95372	3.23844	4.34778	3.80137	8.30438	10.3834	16.4623	20.9689	3.21452	1.66073	0.002189	0	0	0	0	0	0	0	0	0	0	0	0	0	0
894	O=[N+]([O-])c1ccc(Cl)c(Cl)c1	1,2-DICHLORO-4-NITROBENZENE	185.285	0	0	0	0	0	0	0	0	0	0	0	0	0	0	0.016614	2.42118	5.92536	3.739	5.63386	4.44388	7.94168	8.80962	5.20218	21.3399	22.4731	13.8506	11.3253	20.7531	15.9778	6.27965	6.43856	8.13275	5.03968	2.30077	2.49166	2.82668	1.60819	0.047207	0	0	0	0	0	0	0	0
895	C=CCCCCCCCCCCC	1-TRIDECENE	295.188	0	0	0	0	0	0	0	0	0	0	0	0	0	0	0	0	0	0	0	0.677043	4.30366	7.78741	23.8482	47.6031	56.5784	44.9938	39.0377	25.1817	23.9636	5.04937	2.23754	3.37922	3.46485	1.59418	2.41776	0.099567	0	0	0	0	0	0	0	0	0	0
896	C=CCCCCCCCCCCCCC	1-PENTADECENE	339.722	0	0	0	0	0	0	0	0	0	0	0	0	0	0	0	0	0	0	0	0.702811	4.26167	7.69417	24.8558	54.9175	66.5618	52.3231	46.826	28.6277	27.5732	5.49269	2.34796	2.8699	3.40349	2.0362	2.20489	0.114674	0	0	0	0	0	0	0	0	0	0
897	CCCCCCCCCCCCCCCCc1ccccc1	N-HEXADECYLBENZENE	460.024	0	0	0	0	0	0	0	0	0	0	0	0	0	0	0	0	0	0	0.341171	6.30318	9.61734	14.7444	29.2743	66.1117	83.3629	65.2558	57.0355	32.2351	37.1521	7.63226	7.44501	9.095	8.00907	3.54184	0.107477	0	0	0	0	0	0	0	0	0	0	0
898	FCCl	CHLOROFLUOROMETHANE	68.1916	0	0	0	0	0	0	0	0	0	0	0	0	0	0	0.312396	6.04743	4.2187	2.7801	3.62501	3.05152	1.32427	2.08367	3.73855	2.29591	2.68697	4.83153	3.76441	0.885233	8.81628	13.3696	16.6224	5.39508	0	0	0	0	0	0	0	0	0	0	0	0	0	0
899	CCCCCCCCCCCc1ccccc1	N-UNDECYLBENZENE	349.248	0	0	0	0	0	0	0	0	0	0	0	0	0	0	0	0	0	0	0.49086	7.25425	10.4925	14.597	24.3304	47.9073	58.0935	46.4925	40.4351	25.1922	27.8725	6.54576	8.00465	8.99424	8.16313	3.14716	0.012445	0	0	0	0	0	0	0	0	0	0	0
900	CCCCCCCCCCCCCc1ccccc1	N-TRIDECYLBENZENE	393.274	0	0	0	0	0	0	0	0	0	0	0	0	0	0	0	0	0	0	0.370791	6.31511	9.55611	15.1106	26.7961	57.824	66.3962	53.3094	47.2941	27.9456	30.3058	8.0352	6.73327	9.61744	7.76806	3.71011	0.086944	0	0	0	0	0	0	0	0	0	0	0
901	C/C=C\C(C)C	4-METHYL-CIS-2-PENTENE	139.435	0	0	0	0	0	0	0	0	0	0	0	0	0	0	0	0	0	0	0	0.036082	1.79382	11.8113	21.3162	20.4094	17.7335	15.1063	15.4042	18.1947	7.87973	3.69667	2.38183	2.75661	2.88038	1.82806	2.10672	0.287073	0	0	0	0	0	0	0	0	0	0
902	FCCF	1,2-DIFLUOROETHANE	75.8225	0	0	0	0	0	0	0	0	0	0	0	0	0	0	0	0	0	2.87847	12.418	8.1907	5.76637	7.36857	5.22767	1.96546	3.22648	2.04693	1.1803	2.29244	4.69384	2.61712	6.60161	13.8581	12.3608	0.864386	0	0	0	0	0	0	0	0	0	0	0	0
903	C/C=C/C(C)C	4-METHYL-TRANS-2-PENTENE	139.657	0	0	0	0	0	0	0	0	0	0	0	0	0	0	0	0	0	0	0	0	0.768161	10.2276	21.2866	23.4928	18.5028	16.011	16.2152	17.7435	9.11339	3.91529	3.48347	2.2479	2.67306	2.00519	1.05963	0.074791	0	0	0	0	0	0	0	0	0	0
904	CCC(CC)(CC)CC	3,3-DIETHYLPENTANE	208.761	0	0	0	0	0	0	0	0	0	0	0	0	0	0	0	0	0	0	0	0	0	0.569804	16.5261	32.3966	36.8095	23.7364	28.9016	29.764	18.8215	1.2375	0	0	0	0	0	0	0	0	0	0	0	0	0	0	0	0
905	C/C=C(\C)CC	3-METHYL-TRANS-2-PENTENE	139.014	0	0	0	0	0	0	0	0	0	0	0	0	0	0	0	0	0	0	0	0.359804	2.51388	11.84	17.734	20.9789	15.6794	16.153	21.2053	18.4191	8.98342	2.50905	3.35428	2.89999	2.2909	2.27944	0.617018	0	0	0	0	0	0	0	0	0	0	0
906	C/C=C(/C)CC	3-METHYL-CIS-2-PENTENE	140.049	0	0	0	0	0	0	0	0	0	0	0	0	0	0	0	0	0	0	0	0	1.8327	12.7291	17.3808	22.2613	15.5094	16.4166	19.8925	18.8188	7.78891	3.47404	2.84205	2.65934	2.5937	1.84096	1.17344	0.007268	0	0	0	0	0	0	0	0	0	0
907	C=CF	VINYL_FLUORIDE	62.1087	0	0	0	0	0	0	0	0	0	0	0	0	0	0	0	0.11966	2.20304	4.38931	4.882	5.70094	2.43718	3.49162	3.30312	3.66282	4.15172	3.77483	4.23841	3.29592	6.05459	10.5976	11.3824	5.819	1.09156	0	0	0	0	0	0	0	0	0	0	0	0	0
908	COC[C@@H](C)O	PROPYLENE_GLYCOL_MONOMETHYL_ETHER	125.483	0	0	0	0	0	0	0	0	0	0	0	0	0.234902	0.373913	0.492845	1.15833	0.409372	0.091038	0.686007	2.04789	8.41361	20.6987	18.7435	15.9518	14.1303	8.52576	8.97011	6.50841	3.24032	3.34359	2.61184	2.51355	1.62485	1.56699	2.64875	2.87965	1.47417	2.24583	2.08322	2.06	1.50358	0.019253	0	0	0	0
909	COCCOCCOCCOCCOC	TETRAETHYLENE_GLYCOL_DIMETHYL_ETHER	291.569	0	0	0	0	0	0	0	0	0	0	0	0	0	0	0	0	0	0	0.071335	2.699	21.7392	59.5213	43.248	30.9645	32.4449	25.502	12.1754	5.4995	5.09249	7.68931	3.14943	2.74684	3.51672	5.15015	14.1463	8.58417	3.92708	8.66066	4.10925	0.280756	0	0	0	0	0	0
910	CCCCCCCCCCCCC(=O)O	N-TRIDECANOIC_ACID	315.592	0	0	0	0	0	0.398892	0.966835	0.734424	0.468757	0.955542	1.45452	0.930229	0.10446	0.552426	0.884538	1.57454	1.00093	2.87193	3.94974	3.78242	4.11484	5.19817	22.2056	46.308	56.1562	41.9079	34.8775	22.9164	21.2962	2.76842	2.22439	2.77099	1.06916	2.45182	4.42065	6.77935	6.54486	2.87772	2.31281	0.609662	0	0	0	0	0	0
911	CCOCCC(=O)OCC	ETHYL-3-ETHOXYPROPIONATE	193.837	0	0	0	0	0	0	0	0	0	0	0	0	0	0	0	0	0	0.162828	2.69239	6.39867	14.3007	27.0762	28.5864	23.0883	20.3885	16.7875	14.8987	7.55352	3.57343	3.74066	2.48746	3.30949	3.79698	3.00859	5.42064	4.50929	6.90517	3.98411	2.17902	0.296786	0	0	0	0	0	0
912	C=C(C)C(=C)C	2,3-DIMETHYL-1,3-BUTADIENE	133.451	0	0	0	0	0	0	0	0	0	0	0	0	0	0	0	0	0	0	0.015408	2.61272	11.6852	16.664	16.2179	10.5164	10.175	10.2959	16.3882	9.14103	7.33616	8.87204	7.08819	5.31856	4.77587	3.12887	0.022597	0	0	0	0	0	0	0	0	0	0	0
913	C[C@@H]1CC[C@@H](C)C1	TRANS-1,3-DIMETHYLCYCLOPENTANE	153.371	0	0	0	0	0	0	0	0	0	0	0	0	0	0	0	0	0	0	0	0	0	0.830909	14.8654	23.1232	30.5788	23.7731	19.2284	23.0193	16.8734	1.18952	0	0	0	0	0	0	0	0	0	0	0	0	0	0	0	0
914	C[C@@H]1CCCC1(C)C	1,1,2-TRIMETHYLCYCLOPENTANE	174.955	0	0	0	0	0	0	0	0	0	0	0	0	0	0	0	0	0	0	0	0	0	1.23266	16.3005	25.4174	34.6154	24.7506	19.0664	20.663	21.2263	2.54674	0	0	0	0	0	0	0	0	0	0	0	0	0	0	0	0
915	CC(=O)C(=O)O	PYRUVIC_ACID	101.636	0	0	0	0	0	0.222851	1.34997	0.544165	0.993228	1.81455	0.652203	0.134665	0.266821	0.976524	1.19369	0.246602	2.23936	5.68867	4.8554	7.14753	6.47962	6.67289	7.40042	8.72276	4.18712	2.40819	3.49423	2.02461	3.95641	2.46703	4.07705	4.70671	2.92043	5.44718	9.40793	5.66166	3.64426	2.13712	1.57873	0.282814	0	0	0	0	0	0
916	C=CC(C)(C)C	3,3-DIMETHYL-1-BUTENE	141.15	0	0	0	0	0	0	0	0	0	0	0	0	0	0	0	0	0	0	0	0.497477	3.53475	10.6097	22.8269	19.8779	14.373	13.0593	12.4156	20.0164	10.3016	4.02957	2.31193	2.23569	2.97159	2.75702	1.60628	0.060586	0	0	0	0	0	0	0	0	0	0
917	C=C(CC)CC	2-ETHYL-1-BUTENE	141.536	0	0	0	0	0	0	0	0	0	0	0	0	0	0	0	0	0	0	0	0.044627	1.5331	10.3717	20.9353	23.1327	15.7795	17.8434	15.8169	17.9888	6.17136	3.2012	3.43073	3.13635	2.39343	2.57927	0.985156	0.516133	0	0	0	0	0	0	0	0	0	0
918	C1N2CN3CN1CN(C2)C3	HEXAMETHYLENETETRAMINE	165.321	0	0	0	0	0	0	0	0	0	0	0	0	0	0	0	0	0	0	0.012575	25.6464	22.3919	18.2817	8.90786	9.55391	12.7662	8.69483	2.37724	4.79209	5.17635	5.38238	0.47643	2.09984	2.63958	2.00164	1.23106	7.3267	1.70424	0.738461	1.70735	3.33523	3.53676	1.46528	1.94732	0.489656	0	0
919	C1=CCCCCCC1	CYCLOOCTENE	164.038	0	0	0	0	0	0	0	0	0	0	0	0	0	0	0	0	0	0	0	0	0.465024	6.6376	18.2242	25.7974	28.4705	20.9728	21.0077	16.5598	7.18775	3.07942	3.18661	2.47537	1.59049	1.36895	1.23887	0.694384	0.041857	0	0	0	0	0	0	0	0	0
920	CO[C@@H](C)CO	2-METHOXY_PROPANOL-1	125.651	0	0	0	0	0	0	0	0	0	0	0	0	0.13398	0.32953	0.795648	0.666007	0.454462	0.175696	1.58759	3.66406	11.2313	19.2498	17.4626	13.0107	14.1225	9.76908	10.3625	3.62987	2.0202	3.64885	1.60136	1.92386	1.32969	1.3989	1.95389	3.25339	1.55213	2.29126	3.40665	2.64733	1.60656	0.271891	0	0	0	0
921	COC(=O)[C@@H](C)O	METHYL_LACTATE	130.663	0	0	0	0	0	0	0	0	0.238237	0.560188	1.58586	0.320426	0.762235	1.38944	0.861634	0.503912	0.874508	1.69097	2.688	11.5948	14.3854	10.5228	13.7261	11.1451	8.30878	7.98578	5.52757	4.19382	3.33667	2.39445	3.11425	3.91775	3.08794	4.98843	4.12126	7.10188	6.53118	3.18791	1.63889	0.238151	0	0	0	0	0	0
922	CCOC(=O)[C@H](C)O	ETHYL_LACTATE	152.096	0	0	0	0	0	0	0	0	0	0	0.151037	0.922557	0.42306	0.636023	0.360394	0.633662	1.36033	0.877062	2.57043	8.49245	14.6831	17.1696	16.6283	17.6779	11.4265	14.8101	8.30562	4.85912	3.54287	2.98675	1.62053	2.98366	2.69849	3.46854	3.24618	3.80844	6.46945	4.75827	2.45704	1.472	0.096733	0	0	0	0	0
923	C[C@H]1CCC(C)(C)C1	1,1,3-TRIMETHYLCYCLOPENTANE	177.006	0	0	0	0	0	0	0	0	0	0	0	0	0	0	0	0	0	0	0	0	0	1.10596	15.1781	26.085	37.8	25.5358	19.2457	22.4442	20.8491	2.0945	0	0	0	0	0	0	0	0	0	0	0	0	0	0	0	0
924	COC(=O)CCl	METHYL_CHLOROACETATE	119.363	0	0	0	0	0	0	0	0	0	0	0	0	0	0	0.490772	3.98125	3.83311	3.33907	7.7568	10.4319	7.59868	8.98786	9.76068	8.34478	4.04768	4.34774	6.09987	4.5265	1.82011	7.86761	8.87122	9.38792	4.06759	5.05166	1.75226	4.99097	4.02429	1.27346	0.038012	0	0	0	0	0	0	0
925	C=C(C)Cl	2-CHLOROPROPENE	98.0716	0	0	0	0	0	0	0	0	0	0	0	0	0	0	0	0	0	0.69754	3.64274	8.87419	7.89294	6.96015	6.7045	8.70953	9.30678	7.11975	7.41407	5.60313	6.33504	11.7425	13.2178	6.92416	0.741538	0	0	0	0	0	0	0	0	0	0	0	0	0
926	CCOC(=O)C(C)C	ETHYL_ISOBUTYRATE	161.73	0	0	0	0	0	0	0	0	0	0	0	0	0	0	0	0	0	0	0.425152	3.90639	10.6678	18.9344	22.9777	19.6923	17.3173	15.7264	17.8793	11.5043	3.90237	3.56929	2.53175	1.66152	2.62541	1.52263	1.75683	2.05355	2.97653	5.74848	1.46789	0	0	0	0	0	0	0
927	CCCOC(=O)C(C)C	N-PROPYL_ISOBUTYRATE	183.709	0	0	0	0	0	0	0	0	0	0	0	0	0	0	0	0	0	0	0	0.899595	8.20458	24.2071	26.5921	26.2438	20.9557	20.0195	21.3052	11.0095	2.69801	2.63013	1.91492	2.49519	3.25699	2.0949	2.64612	2.4275	3.86197	4.92414	1.39347	0	0	0	0	0	0	0
928	CC(C)COC(=O)C(C)C	ISOBUTYL_ISOBUTYRATE	207.334	0	0	0	0	0	0	0	0	0	0	0	0	0	0	0	0	0	0	0	0.63824	7.0333	22.6603	30.1666	28.646	23.9672	22.5656	22.6527	19.7666	4.34352	1.83623	2.40005	1.15074	3.40439	1.29482	1.97976	1.9567	3.71908	4.93298	1.72728	0.047461	0	0	0	0	0	0
929	CC(C)CCOC(=O)CC(C)C	ISOPENTYL_ISOVALERATE	250.627	0	0	0	0	0	0	0	0	0	0	0	0	0	0	0	0	0	0	0.46559	2.77994	6.06747	15.569	35.4582	41.8487	33.0704	23.6431	22.5918	30.3387	5.57453	2.5862	1.53222	2.83825	3.09371	2.73569	2.54067	2.77049	4.75165	3.4579	0.791997	0	0	0	0	0	0	0
930	ClC(Cl)c1ccccc1	BENZYL_DICHLORIDE	176.024	0	0	0	0	0	0	0	0	0	0	0	0	0	0.246295	2.4312	1.60135	0.700014	2.12693	6.67744	10.1063	11.3183	8.97346	10.2003	8.7989	7.98954	12.9728	10.5915	12.4735	15.9419	23.7974	22.4844	5.51589	0	0	0	0	0	0	0	0	0	0	0	0	0	0
931	O=COCc1ccccc1	BENZYL_FORMATE	172.884	0	0	0	0	0	0	0	0	0	0	0	0	0	0	0.112311	2.2087	3.57344	4.46561	8.68316	15.0171	14.6201	13.8844	9.91539	8.01564	7.84107	8.56024	7.6749	9.66572	10.0945	12.9784	11.0864	2.82266	3.41574	3.30634	5.36055	6.00892	4.21847	2.53496	0.466191	0	0	0	0	0	0	0
932	CCCOC(=O)c1ccccc1	N-PROPYL_BENZOATE	212.445	0	0	0	0	0	0	0	0	0	0	0	0	0	0	0	0	0	0.320828	6.26141	11.4778	13.4194	19.6905	18.988	20.8967	17.3562	16.9162	17.5399	16.049	13.2852	11.7493	11.7534	2.34195	1.66644	1.46483	3.02624	1.42048	4.84632	3.57819	0.216031	0	0	0	0	0	0	0
933	CC1=CCC(C(C)C)=CC1	GAMMA-TERPINENE	202.883	0	0	0	0	0	0	0	0	0	0	0	0	0	0	0	0	0	0	0	0	2.14757	17.8659	27.887	29.1996	23.0379	22.1234	18.8808	19.8145	10.8598	4.85687	5.29843	5.35109	5.56601	3.88878	0.411175	0	0	0	0	0	0	0	0	0	0	0
934	C=C=C(C)C	3-METHYL-1,2-BUTADIENE	113.687	0	0	0	0	0	0	0	0	0	0	0	0	0	0	0	0	0	0	0.72086	3.74519	7.7037	13.0117	15.6337	10.0234	10.9142	13.3165	14.3199	6.20805	6.39297	5.46694	7.9509	7.24476	5.04592	0.92689	0	0	0	0	0	0	0	0	0	0	0	0
935	C=C(C)C(C)=O	METHYL_ISOPROPENYL_KETONE	122.99	0	0	0	0	0	0	0	0	0	0	0	0	0	0	0	0	0	0.702006	5.64406	8.66673	11.3844	10.6592	11.6774	10.3384	12.941	12.2433	14.0414	6.17454	4.01558	4.01425	1.38754	0.881104	1.05442	1.67616	1.42206	2.17483	4.01281	4.1165	1.8437	1.55591	0.128507	0	0	0	0	0
936	Clc1cc(Cl)cc(Cl)c1	1,3,5-TRICHLOROBENZENE	177.86	0	0	0	0	0	0	0	0	0	0	0	0	0	0	0.066354	2.44032	5.54501	2.3117	4.34169	4.39584	3.05055	8.82285	4.66796	1.19487	21.3143	15.8358	37.6155	17.3688	33.9209	16.2673	0.000585	0	0	0	0	0	0	0	0	0	0	0	0	0	0	0
937	C/C=C/c1ccc(OC)cc1	ANETHOLE	201.446	0	0	0	0	0	0	0	0	0	0	0	0	0	0	0	0	0	0.678487	6.15887	15.5385	18.5066	16.1887	17.9157	14.9096	11.8411	11.4299	15.1443	8.87582	12.2201	10.035	12.2314	15.6053	9.75379	2.81052	1.54852	1.97606	0.223358	0	0	0	0	0	0	0	0	0
938	CCCOCCO	ETHYLENE_GLYCOL_MONOPROPYL_ETHER	146.701	0	0	0	0	0	0	0	0	0.128653	0.421003	1.75476	0.266807	0.915537	0.732284	1.47692	0.524896	0.694484	0.960351	1.40379	1.59576	5.77419	15.2779	22.4591	20.5153	16.9174	14.9096	11.5229	10.392	4.07262	2.22083	1.86926	1.6612	0.990845	1.62985	2.40964	4.57802	3.09512	2.12699	4.24124	2.64393	0.984796	0	0	0	0	0
939	O=Cc1ccc(O)cc1	P-HYDROXYBENZALDEHYDE	148.186	0	0	0	0	0	0.211741	1.07052	1.13681	0.789071	0.786893	1.48482	0.842918	0.589255	0.766794	0.721916	1.32948	1.12459	4.48154	9.01835	10.5403	7.42644	5.90465	6.05294	6.98432	8.11139	5.59492	10.5049	13.3243	13.1338	11.3416	3.02998	3.12633	1.80121	3.04313	5.65421	3.48063	4.98625	3.46459	2.26163	0.651906	0.089883	0	0	0	0	0
940	C/C(Cl)=C/CCl	1,3-DICHLORO-TRANS-2-BUTENE	141.218	0	0	0	0	0	0	0	0	0	0	0	0	0	0	0	0	0.789478	4.13252	5.95007	7.89476	10.2684	8.5086	7.61033	9.25912	11.2567	8.26193	12.4195	12.8379	12.0586	12.4875	15.3791	6.77592	3.63217	0	0	0	0	0	0	0	0	0	0	0	0	0
941	FCC(F)(F)F	1,1,1,2-TETRAFLUOROETHANE	91.5139	0	0	0	0	0	0	0	0	0	0	0	0	0	0	0.304875	5.01548	4.34728	4.81155	3.77605	2.62949	1.40672	1.73685	2.72271	2.18169	3.45833	3.24365	10.4481	21.0641	21.201	7.20054	7.34451	3.81224	0	0	0	0	0	0	0	0	0	0	0	0	0	0
942	CC[C@H](C)CC(C)(C)CC	3,3,5-TRIMETHYLHEPTANE	231.01	0	0	0	0	0	0	0	0	0	0	0	0	0	0	0	0	0	0	0	0	0	3.74875	21.1057	31.9015	41.5773	27.0119	27.6788	31.5556	23.9059	3.665	0	0	0	0	0	0	0	0	0	0	0	0	0	0	0	0
943	CCCCCCCCCCCCCCCCCC(=O)OCCCC	N-BUTYL_STEARATE	510.909	0	0	0	0	0	0	0	0	0	0	0	0	0	0	0	0	0	0	0.786377	3.69786	6.86093	14.5646	42.9024	83.197	97.3182	75.0042	62.6544	40.6124	33.7367	4.6388	1.70893	2.27345	3.54434	2.0069	3.53256	2.0754	3.84499	5.23591	1.39628	0	0	0	0	0	0	0
944	CC(C)(O)C#N	ACETONE_CYANOHYDRIN	118.802	0	0	0	0	0	0	0	0.774519	0.694723	1.09941	0.432571	0.972975	1.49972	0.359204	0.588903	0.485826	0.807603	1.19779	5.55106	10.5386	12.2657	7.7296	6.65932	7.55647	15.5239	6.07474	3.16142	2.00851	3.21338	3.5435	1.69651	2.85626	3.48241	6.86371	6.98038	4.95507	5.36607	3.93492	0.338877	0	0	0	0	0	0	0
945	N#CCO	HYDROXYACETONITRILE	75.229	0	0	0	0	0	0	0.350224	0.858119	1.5974	0.837668	0.13336	0.849703	1.91944	0.883791	1.03289	4.91608	7.31959	4.04989	3.78447	4.08195	1.77121	2.08856	3.39047	1.22283	1.46131	2.26392	3.86198	3.84467	1.91831	2.45432	2.07255	4.1281	4.19154	5.05692	7.40526	6.10141	4.80089	3.04167	0.229212	0	0	0	0	0	0	0
946	CCOC(C)(C)CC	ETHYL_TERT-PENTYL_ETHER	177.471	0	0	0	0	0	0	0	0	0	0	0	0	0	0	0	0	0	0	0	0	1.45944	16.7646	22.5222	29.0254	21.7147	20.2213	21.9074	21.9381	6.37462	2.92285	1.23186	0.430516	0.502084	1.03	0.922465	0.484105	1.11946	1.52322	2.05451	1.14609	0.850258	0.055254	0	0	0	0
947	C=CCN	ALLYLAMINE	90.983	0	0	0	0	0	0	0	0	0	0	0	0	0	0	0.721387	2.52466	2.58753	1.40826	2.42929	5.14622	8.24731	10.5439	10.232	8.4613	8.31822	7.15834	4.37435	5.56672	5.54778	2.6219	3.2084	5.15137	2.47168	2.58782	1.35204	1.14536	0.108637	0.022164	0.825753	1.56936	0.353696	0.369697	0.273407	0.915723	0.297862	1.05616
948	CC(=O)CCC(=O)O	LEVULINIC_ACID	144.85	0	0	0	0	0	0	0	0.831171	0.935319	0.378373	1.51908	1.33184	0.509167	0.180405	0.317966	0.723194	0.996876	0.740055	8.01992	16.5437	13.9199	11.5488	8.91565	10.6505	12.6195	6.67384	3.08563	2.14779	4.76333	3.24852	3.58944	2.72095	3.58126	6.24648	5.51468	7.64332	9.3057	3.64956	1.67354	0.434568	0	0	0	0	0	0
949	CC(F)(Cl)Cl	1,1-DICHLORO-1-FLUOROETHANE	113.406	0	0	0	0	0	0	0	0	0	0	0	0	0	0	0	0	0.451327	4.69231	4.49005	5.81981	4.95477	8.77371	6.74835	4.04909	9.66202	6.22385	3.79361	14.559	22.4918	23.7749	2.20641	0	0	0	0	0	0	0	0	0	0	0	0	0	0	0
950	CC[C@@H](C)CCO	3-METHYL-1-PENTANOL	157.066	0	0	0	0	0	0	0	0	0	0.293488	0.695857	1.48764	0.247341	0.751667	0.777069	1.17982	0.889859	0.387029	0.859209	1.12383	3.03531	7.48738	19.0308	24.8168	23.6067	16.0201	15.6346	17.7849	7.52658	1.79111	1.09117	1.40338	0.781619	0.755826	1.13552	0.875288	1.81149	1.16816	2.33004	2.17902	1.86922	0.942593	0	0	0	0
951	Nc1ccccc1N	O-PHENYLENEDIAMINE	141.109	0	0	0	0	0	0	0	0	0	0	0	0	0.378569	2.67313	4.66691	4.70035	4.90148	5.00542	5.36833	5.32367	7.47093	9.53944	7.14691	7.07597	5.96078	5.85748	5.08074	5.5481	7.98963	9.09194	9.86624	10.6461	7.98656	6.40065	1.43476	2.35795	0.875267	1.17999	1.18816	1.45601	0.766031	0	0	0	0	0
952	CCN(CC)CCO	DIETHYLETHANOLAMINE	174.404	0	0	0	0	0	0	0	0	0.00855	0.516147	1.02079	1.26127	0.346297	0.737022	0.974981	1.19862	0.733485	0.485289	1.45358	1.48606	5.68578	13.2914	17.8407	23.9641	20.7645	20.4617	17.6923	13.7294	5.72125	2.82712	2.17526	1.84236	0.988057	1.55952	0.995496	1.95522	2.1351	1.51677	3.51939	2.66921	2.00892	0.489746	0.013104	0	0	0
953	CC(C)CNCC(C)C	DIISOBUTYLAMINE	209.138	0	0	0	0	0	0	0	0	0	0	0	0	0	0	0	0.209394	0.959686	0.976336	1.4773	0.802025	1.12329	4.07014	22.1744	30.1877	38.4951	24.8197	21.331	25.9986	22.5322	4.23969	1.01325	1.01798	1.99033	0.889296	0.503968	0.288006	0.293508	0.698937	0.124165	0.192745	0	0	0	0	0	0
954	Cc1c(C)c(C)c(C)c(C)c1C	HEXAMETHYLBENZENE	234.137	0	0	0	0	0	0	0	0	0	0	0	0	0	0	0	0	0	0	0	0	2.03595	21.7931	32.8668	31.8401	24.8196	19.073	25.9336	20.5189	9.95839	3.69205	6.88461	4.31278	7.57434	3.33963	1.59915	1.2589	0.031804	0	0	0	0	0	0	0	0	0
955	C(=C/c1ccccc1)\c1ccccc1	TRANS-STILBENE	240.552	0	0	0	0	0	0	0	0	0	0	0	0	0	0	0	0	0.00192	3.44686	11.4719	21.6599	21.1766	15.6308	13.4783	10.6465	11.2788	12.1755	9.70678	16.7787	13.7904	18.4657	29.0871	21.2679	6.24576	0	0	0	0	0	0	0	0	0	0	0	0	0
956	N#C/C=C/C#N	FUMARONITRILE	106.46	0	0	0	0	0	0	0	0	0	0	0	0	4.53708	5.91607	3.00746	2.37868	2.03459	2.50407	3.35272	2.93023	8.64687	8.51974	8.92218	3.31664	5.91449	5.77373	1.82858	3.27588	2.19106	4.43807	3.79275	7.9221	6.42471	11.5459	6.79132	5.73418	2.4854	0	0	0	0	0	0	0	0	0
957	N#C/C=C\C#N	MALEONITRILE	106.759	0	0	0	0	0	0	0	0	0	0	0	0	3.01843	7.40089	3.78019	2.56271	2.73646	2.42824	3.15722	2.78298	4.64813	10.5983	7.23119	4.40019	4.89462	6.0333	1.6048	3.66941	1.8532	6.40612	3.94812	8.66733	5.85867	10.546	7.13317	5.36575	2.15441	0	0	0	0	0	0	0	0	0
958	C1C2CC3CC1CC(C2)C3	ADAMANTANE	181.501	0	0	0	0	0	0	0	0	0	0	0	0	0	0	0	0	0	0	0	0	0	0	2.82369	30.4104	42.5052	28.9142	28.723	19.5767	12.9989	0.061775	0	0	0	0	0	0	0	0	0	0	0	0	0	0	0	0
959	Cc1cccc(CO)c1	M-TOLUALCOHOL	163.937	0	0	0	0	0	0	0	0	0.220032	0.780826	1.84489	0.353559	0.611148	0.975034	1.0309	0.9541	0.781852	1.0243	0.94395	6.6957	16.2127	18.0918	15.3933	9.2827	8.3491	10.3271	13.3766	6.28587	9.10862	5.93655	8.98746	11.5399	6.84764	3.59647	1.23384	1.65533	1.97646	1.72768	1.38243	0.948164	0.317413	0	0	0	0	0
960	Cc1ccc(CO)cc1	P-TOLUALCOHOL	165.558	0	0	0	0	0	0	0	0	0	0.313376	0.848743	1.19319	0	0.85985	1.27896	0.739952	0.602888	0.965025	0.847012	7.91259	17.0189	16.0942	15.747	11.0614	10.8515	12.0524	13.0133	6.49528	9.96418	6.09686	9.90643	8.5059	5.54596	1.02249	0.915899	1.95948	1.3952	1.15057	2.25557	2.36388	0.742305	0.107129	0	0	0	0
961	Cc1ccccc1C=O	O-TOLUALDEHYDE	158.066	0	0	0	0	0	0	0	0	0	0	0	0	0	0	0	0	0	1.24941	8.45591	13.0147	12.7766	10.8013	10.5177	11.0697	9.3911	13.114	15.8796	9.70773	9.81709	10.3387	6.84984	1.6257	1.30826	1.69384	2.30573	2.19093	4.18858	2.03525	1.59571	0.641685	0.00175	0	0	0	0	0
962	Cc1ccccc1C(=O)O	O-TOLUIC_ACID	166.246	0	0	0	0	0	0	0	1.02708	0.719792	0.637302	1.45768	0.970588	0.663688	0.175162	0.321355	0.636011	0.903313	0.884147	4.67368	8.9984	11.5603	10.5409	9.18603	9.31642	12.0403	14.7273	12.6155	11.796	12.2717	11.8985	9.63378	4.52425	1.51928	2.98754	1.38506	1.8859	6.46729	1.6167	0.196716	0	0	0	0	0	0	0
963	Cc1ccc(C(=O)O)cc1	P-TOLUIC_ACID	167.926	0	0	0	0	0	0	0	0.601456	1.16504	0	1.7138	1.15681	0.784625	0.23112	0.302148	0.42055	1.10782	0.826066	1.82365	8.05064	13.4865	11.5479	10.2084	10.9555	15.4845	15.7411	12.082	13.1894	13.7213	11.6643	3.54781	3.38057	2.14865	3.76041	2.59221	2.43574	6.65585	1.58916	0.105303	0	0	0	0	0	0	0
964	O=C(O)/C=C/c1ccccc1	CINNAMIC_ACID	184.226	0	0	0	0	0	0	0	0.876415	0.890075	0.149789	1.69324	1.21169	0.598838	0.217029	0.284673	0.574954	2.69541	5.29937	11.6928	12.9208	10.0734	7.50504	7.11456	9.31801	9.96969	11.8619	12.7916	13.7357	13.9999	14.7999	12.2961	4.14555	2.30285	3.27811	3.17389	1.26587	6.38905	3.63637	1.81705	0.004267	0	0	0	0	0	0
965	CC/C=C/C/C=C/C/C=C/CCCCCCCC(=O)O	LINOLENIC_ACID	408.5	0	0	0	0	0	0	0	0.405327	1.30975	0.121191	1.42573	1.27809	0.850768	0.238341	0.277966	0.360967	1.21667	0.761553	1.27876	5.07934	5.82761	24.0916	48.1404	61.1	53.6751	44.6424	32.8343	30.2967	14.6756	17.5004	13.4745	8.93125	6.58235	6.27566	2.97835	4.52724	5.50169	2.28091	0.221267	0	0	0	0	0	0	0
966	CCCCC/C=C\C/C=C\CCCCCCCC(=O)O	LINOLEIC_ACID	413.913	0	0	0	0	0	0	0	0.40875	1.3108	0.115172	1.43306	1.28012	0.847504	0.234808	0.278676	0.366486	1.21074	0.765104	1.33816	5.2821	7.11544	17.2195	37.7699	66.806	63.5178	48.9718	33.7964	32.6724	16.9111	7.7103	10.0668	8.99618	5.78353	8.45962	3.28616	4.37749	5.6046	2.27202	0.242201	0	0	0	0	0	0	0
967	CCCCCCCCCCCCCCCCCCCC(=O)O	N-EICOSANIC_ACID	468.608	0	0	0	0	0	0.267594	1.02932	0.803252	0.487008	0.71107	1.634	1.00653	0.257123	0.374797	1.12952	1.17643	0.970484	2.76929	4.35531	3.2871	4.55797	5.36595	25.5052	70.8619	90.603	70.1393	58.4735	33.8196	34.5317	3.48513	2.60056	2.90412	0.730246	2.67779	4.3562	6.55363	6.81925	2.87375	2.28002	0.637701	0	0	0	0	0	0
968	C=CC(=O)OCC(C)C	ISOBUTYL_ACRYLATE	179.387	0	0	0	0	0	0	0	0	0	0	0	0	0	0	0	0	0.043953	2.03705	4.77864	6.33106	7.90035	15.724	20.4999	21.8604	18.8195	17.6234	14.7676	17.0891	7.93402	6.41641	3.60495	1.62839	2.30666	1.62808	3.00564	1.91621	4.02574	4.86642	0.492248	0	0	0	0	0	0	0
969	C=C(C)C(=O)OCC	ETHYL_METHACRYLATE	155.613	0	0	0	0	0	0	0	0	0	0	0	0	0	0	0	0	0	0.211194	1.96229	6.02993	14.949	16.8352	16.6002	15.3014	15.9132	17.6128	16.3272	6.4947	6.68407	6.1217	4.22312	2.78081	2.57103	1.35342	1.70563	2.2778	3.38341	4.57515	1.22228	0	0	0	0	0	0	0
970	C=C(C)C(=O)OCC(C)C	ISOBUTYL_METHACRYLATE	201.431	0	0	0	0	0	0	0	0	0	0	0	0	0	0	0	0	0	0.217479	1.87548	4.85503	10.0984	18.4783	23.0285	25.0575	21.4575	21.3921	20.8681	17.5041	8.23539	5.821	3.738	1.59107	1.82884	1.34173	1.55768	2.4345	3.23302	4.74173	1.36474	0	0	0	0	0	0	0
971	Clc1ccccc1-c1ccccc1	2-CHLOROBIPHENYL(PCB_1)	227.024	0	0	0	0	0	0	0	0	0	0	0	0	0	0	0	0	0.023531	1.25041	11.3388	16.7497	18.4285	13.5349	12.0111	10.5916	8.34724	12.0138	13.5607	19.3472	20.6207	23.2337	20.6312	10.4642	3.78	0.025211	0	0	0	0	0	0	0	0	0	0	0	0
972	Clc1cccc(-c2ccccc2)c1	3-CHLOROBIPHENYL(PCB_2)	226.293	0	0	0	0	0	0	0	0	0	0	0	0	0	0	0	0	0.258169	3.73433	13.3638	16.4609	15.5063	10.8948	11.7209	9.59989	7.35089	13.6166	12.9124	19.999	24.2326	28.1353	21.2206	8.1579	1.67939	0	0	0	0	0	0	0	0	0	0	0	0	0
973	Clc1ccc(-c2ccccc2)cc1	4-CHLOROBIPHENYL(PCB_3)	225.997	0	0	0	0	0	0	0	0	0	0	0	0	0	0	0	0	0.261856	5.3071	13.1827	16.0835	14.4409	10.872	11.9627	8.91388	7.87468	12.8034	12.5208	19.5058	25.4877	29.2293	19.8316	8.36942	2.04581	0	0	0	0	0	0	0	0	0	0	0	0	0
974	C=CCNCC=C	DIALLYLAMINE	151.888	0	0	0	0	0	0	0	0	0	0	0	0	0	0	0.25487	0.803982	1.31654	0.484308	0.313581	6.36778	14.006	17.4026	18.955	15.1036	13.1645	13.2224	8.00075	11.9041	8.1954	5.24862	7.31836	7.64469	3.29765	5.28444	0.945572	0.356364	0.232064	0.398368	2.21539	0.209363	0.304473	0.321092	0.575535	0.198643	0.296714	0
975	C=CCN(CC=C)CC=C	TRIALLYLAMINE	211.971	0	0	0	0	0	0	0	0	0	0	0	0	0	0	0	0	0	0	0.114479	9.02394	15.6387	20.7918	22.8344	21.3451	18.8186	19.8214	13.3525	15.2794	12.6818	6.93163	7.27735	9.15234	3.16861	5.62514	1.51721	0.784224	0.978499	1.50325	0.690648	0.0643	0.398899	0.448593	0.041198	0	0	0
976	CCc1cccc(CC)c1N	2,6-DIETHYLANILINE	207.535	0	0	0	0	0	0	0	0	0	0	0	0	0.294391	1.51615	2.48336	1.90417	1.66598	2.75174	1.87676	3.37872	6.51727	20.0139	22.0524	22.9967	17.0672	17.1223	15.0634	14.0239	6.42184	6.21839	8.14783	6.2485	6.99016	6.45013	5.41362	1.46923	0.97761	0.18753	0.765958	0.609883	0.666928	0.391077	0	0	0	0
977	CCCCNc1ccccc1	N-BUTYLANILINE	211.815	0	0	0	0	0	0	0	0	0	0	0	0.240441	0.73141	1.17027	0.68189	0.740662	1.10989	1.07845	2.03499	4.6086	9.47722	19.0504	26.3128	25.9014	19.5921	15.6454	14.7435	15.1987	7.9658	8.06882	6.99818	9.86157	10.6083	6.82778	4.80156	0.409666	0	0	0	0	0	0	0	0	0	0
978	Nc1ccc(-c2ccccc2)cc1	P-AMINODIPHENYL	217.806	0	0	0	0	0	0	0	0	0	0	0.498825	2.64628	1.96549	2.23667	2.54667	2.32781	2.88363	5.31172	6.65498	15.9872	12.8514	13.1834	9.99152	9.0084	6.06751	8.44062	11.2531	8.19341	11.4826	12.3342	20.9081	21.5678	17.9286	5.29808	1.00734	0.294916	0	0	0	0	0	0	0	0	0	0
979	NC(=O)c1ccccc1	BENZAMIDE	150.509	0	0	0	0	0	0	0	0	0.000766	0.510528	1.82945	1.97273	2.06492	2.84228	2.11178	2.63381	1.2606	1.79664	4.06324	8.18117	11.1444	8.48657	5.93509	7.69966	5.93402	9.21157	11.1131	10.8252	16.9501	14.0627	5.77463	0.984139	0.754719	1.47498	1.55568	1.29151	2.42104	1.68639	6.67158	2.59725	1.03132	0	0	0	0	0
980	O=CNc1ccccc1	FORMANILIDE	151.677	0	0	0	0	0	0	0	0	0.685197	1.41731	1.27747	1.63769	1.10767	0.420396	1.13066	1.65272	1.87254	4.21999	6.97082	9.51025	9.86679	9.30284	7.93891	7.47968	6.25121	8.27184	5.94997	13.8586	9.462	8.43873	10.8549	9.08116	3.15062	2.66137	0.869558	2.56209	2.95311	3.96234	2.1063	1.22782	0.33304	0	0	0	0	0
981	C(#Cc1ccccc1)c1ccccc1	DIPHENYLACETYLENE	236.01	0	0	0	0	0	0	0	0	0	0	0	0	0	0	0	0	0	0.756422	14.2098	21.3606	20.1572	12.7762	13.7655	11.3481	7.46826	12.6684	10.8036	17.8923	24.1361	30.1286	26.4155	13.6316	0.069384	0	0	0	0	0	0	0	0	0	0	0	0	0
982	Clc1ccccc1-c1ccccc1Cl	2,2'-DICHLOROBIPHENYL(PCB_4)	252.167	0	0	0	0	0	0	0	0	0	0	0	0	0	0	0	0	0.087412	3.79475	16.2295	15.797	14.5007	11.5024	12.9312	8.44751	8.72939	13.4563	18.4689	17.1085	23.4903	31.1651	29.171	4.06617	0.190452	0	0	0	0	0	0	0	0	0	0	0	0	0
983	Clc1ccc(-c2ccccc2Cl)cc1	2,4'-DICHLOROBIPHENYL(PCB_8)	248.439	0	0	0	0	0	0	0	0	0	0	0	0	0	0	0	0	0.282842	6.37944	15.3489	14.5083	12.8396	10.0282	12.2142	7.95726	8.22002	15.3103	18.8658	24.3047	30.6284	35.5989	19.8204	1.8197	0.014041	0	0	0	0	0	0	0	0	0	0	0	0	0
984	Clc1cc(Cl)cc(-c2ccccc2)c1	3,5-DICHLOROBIPHENYL(PCB_14)	249.129	0	0	0	0	0	0	0	0	0	0	0	0	0	0	0	0.279737	2.95677	4.48128	10.5729	13.5714	14.2803	10.4488	10.8329	8.47722	11.0538	20.146	19.8869	35.047	29.4778	27.4385	11.7176	7.06449	0.604736	0	0	0	0	0	0	0	0	0	0	0	0	0
985	Clc1ccc(Cl)c(-c2ccccc2)c1	2,5-DICHLOROBIPHENYL(PCB_9)	248.807	0	0	0	0	0	0	0	0	0	0	0	0	0	0	0	0	2.05322	6.02683	9.73989	13.1041	16.0894	10.87	12.2842	9.11712	7.97007	21.6237	16.5503	30.7044	28.8115	25.0116	13.8926	8.79927	1.79271	0	0	0	0	0	0	0	0	0	0	0	0	0
986	Clc1cccc(Cl)c1-c1ccccc1	2,6-DICHLOROBIPHENYL(PCB_10)	251.252	0	0	0	0	0	0	0	0	0	0	0	0	0	0	0	0	0.620373	5.84235	11.3446	13.8482	15.8671	12.5766	13.0274	9.3757	7.67356	18.5796	15.6937	24.2567	25.6639	26.338	16.1817	8.35717	3.90129	0.203439	0	0	0	0	0	0	0	0	0	0	0	0
987	Clc1cccc(-c2cccc(Cl)c2)c1	3,3'-DICHLOROBIPHENYL(PCB_11)	248.282	0	0	0	0	0	0	0	0	0	0	0	0	0	0	0	0	1.45018	9.24516	15.0091	12.766	11.3655	6.78616	13.1313	8.59522	7.36787	15.9384	19.9712	25.4022	34.9676	39.0773	16.66	0	0	0	0	0	0	0	0	0	0	0	0	0	0	0
988	Clc1ccc(-c2ccc(Cl)cc2)cc1	4,4'-DICHLOROBIPHENYL(PCB_15)	248.388	0	0	0	0	0	0	0	0	0	0	0	0	0	0	0	0	0.725942	11.7656	16.0551	10.9617	10.4192	8.10099	11.3487	8.44028	7.91311	12.8989	21.433	24.1136	37.1705	42.1841	14.285	0	0	0	0	0	0	0	0	0	0	0	0	0	0	0
989	Clc1ccc(-c2ccccc2)cc1Cl	3,4-DICHLOROBIPHENYL(PCB_12)	248.07	0	0	0	0	0	0	0	0	0	0	0	0	0	0	0	0	1.42875	6.42252	10.7552	13.9412	14.4821	11.5334	10.1667	8.7559	12.514	17.7703	19.3981	27.1385	32.0854	25.2598	15.4759	7.85944	0.724664	0	0	0	0	0	0	0	0	0	0	0	0	0
990	Clc1cc(Cl)c(-c2ccccc2)c(Cl)c1	2,4,6-TRICHLOROBIPHENYL(PCB_30)	274.127	0	0	0	0	0	0	0	0	0	0	0	0	0	0	0	1.34554	3.51862	2.16934	8.34707	12.6669	13.8511	14.4306	10.5307	7.11175	20.6834	21.9719	32.8908	22.1066	31.9391	24.7647	10.1243	8.40084	2.19752	0.006533	0	0	0	0	0	0	0	0	0	0	0	0
991	Clc1ccc(-c2ccc(Cl)cc2Cl)cc1	2,4,4'-TRICHLOROBIPHENYL(PCB_28)	270.551	0	0	0	0	0	0	0	0	0	0	0	0	0	0	0	0.265773	2.66194	10.9514	11.9915	10.9158	9.38875	8.3708	12.4115	5.89262	11.6399	23.2875	26.7536	33.8762	39.3332	34.9878	10.2206	0.187196	0	0	0	0	0	0	0	0	0	0	0	0	0	0
992	Clc1cc(Cl)c(-c2ccccc2)cc1Cl	2,4,5-TRICHLOROBIPHENYL(PCB_29)	270.715	0	0	0	0	0	0	0	0	0	0	0	0	0	0	0.041305	0.946214	2.82531	2.01583	8.84242	13.2866	13.8667	14.4921	9.19651	8.05354	20.9692	25.3592	30.1761	24.6217	32.0747	23.5688	11.7547	8.19759	0.988245	0	0	0	0	0	0	0	0	0	0	0	0	0
993	Clc1ccc(Cl)c(-c2ccccc2Cl)c1	2,2',5-TRICHLOROBIPHENYL(PCB_18)	274.44	0	0	0	0	0	0	0	0	0	0	0	0	0	0	0	0.106	3.04865	9.04141	12.3627	12.5302	11.5225	8.84108	13.7913	6.77048	9.3971	23.1367	20.6149	28.1354	34.4165	36.5721	17.6197	0.570004	0	0	0	0	0	0	0	0	0	0	0	0	0	0
994	Clc1ccc(-c2cc(Cl)ccc2Cl)cc1	2,4',5-TRICHLOROBIPHENYL(PCB_31)	270.75	0	0	0	0	0	0	0	0	0	0	0	0	0	0	0	0.000459	3.19328	11.7964	11.8254	10.2274	10.2058	7.93759	12.5435	6.88857	9.7563	24.1468	23.1012	36.0317	38.3803	35.5049	11.17	0.497853	0	0	0	0	0	0	0	0	0	0	0	0	0	0
995	Clc1cc(-c2ccccc2)c(Cl)c(Cl)c1Cl	2,3,4,5-TETRACHLOROBIPHENYL(PCB_61)	290.883	0	0	0	0	0	0	0	0	0	0	0	0	0	0	0	0.301841	1.386	1.38258	8.16464	13.4806	15.6449	15.3394	5.99961	15.3363	34.4224	23.7096	18.0788	34.9056	32.7227	27.1382	9.18377	7.33684	0.350626	0	0	0	0	0	0	0	0	0	0	0	0	0
996	Clc1ccc(-c2cc(Cl)ccc2Cl)c(Cl)c1	2,2',4,5'-TETRACHLOROBIPHENYL(PCB_49)	297.229	0	0	0	0	0	0	0	0	0	0	0	0	0	0	0	0.419586	6.4837	11.5817	8.44534	9.93404	7.41329	10.3235	12.1207	4.45969	15.4954	30.6383	25.5713	37.4946	43.8852	36.7884	6.54257	0	0	0	0	0	0	0	0	0	0	0	0	0	0	0
997	Clc1c(Cl)c(Cl)c(-c2ccccc2)c(Cl)c1Cl	2,3,4,5,6-PENTACHLOROBIPHENYL(PCB_116)	314.696	0	0	0	0	0	0	0	0	0	0	0	0	0	0	0	0	0	0.801332	7.43153	12.7209	19.7669	12.9882	6.04819	34.2031	31.1267	13.3613	18.4001	38.0369	41.2481	25.4281	6.32173	7.51185	0.776332	0	0	0	0	0	0	0	0	0	0	0	0	0
998	Clc1ccc(Cl)c(-c2cc(Cl)c(Cl)cc2Cl)c1	2,2',4,5,5'-PENTACHLOROBIPHENYL(PCB_101)	317.327	0	0	0	0	0	0	0	0	0	0	0	0	0	0	0.098591	2.10257	7.29503	7.20955	7.9073	7.20944	7.65042	12.7433	9.20023	7.82725	26.9833	34.7949	29.36	37.6167	47.8229	33.0267	4.70867	0	0	0	0	0	0	0	0	0	0	0	0	0	0	0
999	Clc1ccc(-c2c(Cl)cc(Cl)cc2Cl)c(Cl)c1	2,2',4,4',6-PENTACHLOROBIPHENYL(PCB_100)	320.853	0	0	0	0	0	0	0	0	0	0	0	0	0	0	0.1256	2.50641	7.55698	6.47095	8.09608	7.11175	6.30794	14.0865	8.42329	5.33802	29.099	26.5298	38.6795	34.8343	53.7613	30.5002	1.28535	0	0	0	0	0	0	0	0	0	0	0	0	0	0	0
1000	Clc1ccc(-c2cc(Cl)c(Cl)cc2Cl)c(Cl)c1	2,2',4,4',5-PENTACHLOROBIPHENYL(PCB_99)	318.274	0	0	0	0	0	0	0	0	0	0	0	0	0	0	0.09226	2.12842	7.00647	6.76523	8.23941	7.95902	6.37186	14.6984	6.99101	6.44249	30.8447	32.5108	31.5914	38.7669	47.1797	33.9201	2.79662	0	0	0	0	0	0	0	0	0	0	0	0	0	0	0
1001	Clc1ccc(Cl)c(-c2c(Cl)ccc(Cl)c2Cl)c1Cl	2,2',3,3',6,6'-HEXACHLOROBIPHENYL(PCB_136)	341.475	0	0	0	0	0	0	0	0	0	0	0	0	0	0	0	1.41598	9.48067	8.09754	4.52487	6.98834	8.56759	15.1657	6.11777	8.75493	29.8944	23.9689	32.9054	49.6043	51.1626	27.4432	2.03758	0	0	0	0	0	0	0	0	0	0	0	0	0	0	0
1002	Clc1ccc(-c2ccc(Cl)c(Cl)c2Cl)c(Cl)c1Cl	2,2',3,3',4,4'-HEXACHLOROBIPHENYL(PCB_128)	339.172	0	0	0	0	0	0	0	0	0	0	0	0	0	0	0	0.716621	6.30446	8.64024	5.08716	8.55981	8.75837	17.1222	3.6206	12.306	37.0771	30.9266	27.7973	45.9619	49.318	31.1887	2.54507	0	0	0	0	0	0	0	0	0	0	0	0	0	0	0
1003	Clc1cc(Cl)c(-c2c(Cl)cc(Cl)cc2Cl)c(Cl)c1	2,2'4,4'6,6'-HEXACHLOROBIPHENYL(PCB_155)	343.791	0	0	0	0	0	0	0	0	0	0	0	0	0	0	0.497368	5.08811	6.16703	2.08035	8.12425	5.28667	5.16304	18.1876	3.487	10.3398	33.8789	28.6623	43.3943	45.0687	58.0798	18.1566	0	0	0	0	0	0	0	0	0	0	0	0	0	0	0	0
1004	Clc1cc(Cl)c(-c2cc(Cl)c(Cl)cc2Cl)cc1Cl	2,2',4,4',5,5'-HEXACHLOROBIPHENYL(PCB_153)	340.448	0	0	0	0	0	0	0	0	0	0	0	0	0	0	0.385726	4.92364	5.75537	3.15198	7.477	5.535	6.13469	16.9899	4.12604	12.1499	40.1664	40.3908	29.8994	41.2624	51.4048	28.5348	2.37323	0	0	0	0	0	0	0	0	0	0	0	0	0	0	0
1005	Clc1ccc(-c2c(Cl)cc(Cl)c(Cl)c2Cl)c(Cl)c1Cl	2,2',3,3',4,4',6-HEPTACHLOROBIPHENYL(PCB_171)	360.978	0	0	0	0	0	0	0	0	0	0	0	0	0	0	0.295374	2.30411	5.45619	4.90123	4.85761	6.04749	11.494	14.5857	2.89184	23.7147	40.1038	30.903	26.1578	56.3107	52.5502	24.552	0.539881	0	0	0	0	0	0	0	0	0	0	0	0	0	0	0
1006	Clc1cc(Cl)c(Cl)c(-c2c(Cl)c(Cl)cc(Cl)c2Cl)c1Cl	2,2',3,3',5,5',6,6'-OCTACHLOROBIPHENYL(PCB_202)	384.495	0	0	0	0	0	0	0	0	0	0	0	0	0	0	1.40842	3.81565	1.37081	3.26824	2.94075	4.90936	15.7355	10.6007	2.89807	29.846	43.9175	37.506	29.8185	63.9034	49.0413	17.8499	0	0	0	0	0	0	0	0	0	0	0	0	0	0	0	0
1007	Clc1cc(Cl)c(Cl)c(-c2c(Cl)c(Cl)c(Cl)c(Cl)c2Cl)c1Cl	2,2',3,3',4,5,5',6,6'-NONACHLOROBIPHENYL(PCB_208)	404.436	0	0	0	0	0	0	0	0	0	0	0	0	0	0	0.767123	1.90711	0.623206	1.72299	3.02394	5.01043	20.3891	5.64821	9.22662	45.0064	38.8656	25.4575	45.9655	63.9252	54.3425	10.9011	0	0	0	0	0	0	0	0	0	0	0	0	0	0	0	0
1008	Clc1c(Cl)c(Cl)c(-c2c(Cl)c(Cl)c(Cl)c(Cl)c2Cl)c(Cl)c1Cl	DECACHLOROBIPHENYL(PCB_209)	424.492	0	0	0	0	0	0	0	0	0	0	0	0	0	0	0	0	0	0	3.20891	5.65574	24.1539	1.44685	16.2099	59.983	30.8872	16.3788	60.1501	65.6556	58.609	4.31619	0	0	0	0	0	0	0	0	0	0	0	0	0	0	0	0
1009	C=C(Cl)CCl	2,3-DICHLOROPROPENE	119.356	0	0	0	0	0	0	0	0	0	0	0	0	0	0	0	1.17362	4.66963	4.24037	5.93132	4.88809	5.14555	4.39112	7.05788	6.40831	4.60324	9.85312	11.1867	9.3442	12.254	22.6658	10.3491	5.14208	0.145746	0	0	0	0	0	0	0	0	0	0	0	0	0
1010	Clc1cc(Cl)c(Cl)c(Cl)c1Cl	PENTACHLOROBENZENE	217.882	0	0	0	0	0	0	0	0	0	0	0	0	0	0	0.564404	1.87885	0.85419	1.42525	2.08532	2.64805	11.6012	4.52468	1.20494	32.1325	28.4858	16.1282	16.2623	39.0785	35.9104	11.603	0	0	0	0	0	0	0	0	0	0	0	0	0	0	0	0
1011	Clc1c(Cl)c(Cl)c(Cl)c(Cl)c1Cl	HEXACHLOROBENZENE	238.134	0	0	0	0	0	0	0	0	0	0	0	0	0	0	0	0	0	0	2.07522	3.29181	15.1237	0.835933	12.7047	45.1207	14.4812	6.34136	33.783	39.6623	42.9322	4.13578	0	0	0	0	0	0	0	0	0	0	0	0	0	0	0	0
1012	CN(C)CCN(C)C	TETRAMETHYLETHYLENEDIAMINE	179.056	0	0	0	0	0	0	0	0	0	0	0	0	0	0	0	0	0	0	0	0	4.07522	15.8269	16.6207	21.3499	27.8004	27.114	28.9095	13.4087	4.99254	3.71054	1.37048	2.31479	1.53496	1.06683	0.756059	0.350018	0.49758	0.306162	0.605809	1.16404	0.534305	0.401704	0.417965	0.33415	0.035043	0
1013	CCOCCOCCOC(C)=O	DIETHYLENE_GLYCOL_ETHYL_ETHER_ACETATE	227.811	0	0	0	0	0	0	0	0	0	0	0	0	0	0	0	0	0	0.588729	4.37822	8.84026	20.5011	31.3416	29.3365	30.011	23.9311	15.1546	13.0744	7.25703	4.68304	4.41549	2.9635	4.20027	3.68318	5.34611	7.49697	5.25147	8.46224	5.20711	3.15261	0.154627	0	0	0	0	0	0
1014	CCCCOCCOCCOC(C)=O	DIETHYLENE_GLYCOL_MONOBUTYL_ETHER_ACETATE	271.162	0	0	0	0	0	0	0	0	0	0	0	0	0	0	0	0	0	0.717054	4.37918	9.178	18.5575	28.1717	35.5167	39.3572	33.3712	21.5718	15.0454	15.3482	6.92457	4.88195	2.92737	4.49612	3.52528	5.20481	6.81982	5.41538	8.48952	4.99888	3.20057	0.565472	0	0	0	0	0	0
1015	CC(=O)c1ccc(O)cc1	4-HYDROXYACETOPHENONE	168.856	0	0	0	0	0	0	0.340897	1.46157	0.731968	0.749174	1.3151	1.07035	0.723999	0.639597	0.913374	0.796123	1.32109	1.73382	6.89512	11.3367	11.0107	9.45585	8.77785	8.66023	12.4076	10.8552	10.7777	13.1595	15.2855	10.7843	2.68253	2.54365	1.80556	2.74038	4.95752	4.22465	3.67818	4.87613	1.51269	1.37425	0.164689	0	0	0	0	0
1016	CC(C)CC(O)CC(C)C	2,6-DIMETHYL-4-HEPTANOL	222.107	0	0	0	0	0	0	0	0	0	0	0	0	0	0.469228	0.311432	0.625121	1.011	0.828205	0.707276	1.14196	1.89268	8.30348	28.1992	35.9864	32.8345	22.4881	19.7219	22.8629	17.263	5.59647	1.6844	0.850695	0.616209	0.642515	1.75182	1.64868	0.823125	1.08101	1.95388	0.269004	0.859192	0.565412	0.093175	0	0	0
1017	NCCNCCN	DIETHYLENETRIAMINE	150.858	0	0	0	0	0	0	0	0	0	0	0	0	0	0	0.926305	5.9373	5.85375	5.35984	7.04461	6.62905	7.71415	14.7223	14.7533	18.3694	13.2824	10.1455	9.25341	4.79356	3.3951	5.08846	1.54221	1.42037	2.61639	1.63665	2.31531	2.15585	1.79367	0.439052	0.508271	3.52583	3.43529	0.904456	1.52324	1.77296	1.64918	1.65912
1018	CO[C@@H](C)CO[C@@H](C)COC(C)=O	DIPROPYLENE_GLYCOL_MONOMETHYL_ETHER_ACETATE	253.723	0	0	0	0	0	0	0	0	0	0	0	0	0	0	0	0	0	0.618881	3.50503	7.55251	19.9276	31.3387	28.1963	30.1487	28.3933	19.1916	18.1705	12.1265	6.01872	3.70643	3.14084	4.02745	3.22332	3.01461	6.28019	4.6363	7.711	4.87055	3.58681	0.962484	0	0	0	0	0	0
1019	CCCCCCOCCO	2-HEXOXYETHANOL	212.45	0	0	0	0	0	0	0	0	0.082873	0.55898	1.66135	0.506063	0.701964	0.739334	1.10785	1.04527	0.608377	0.877652	1.04902	2.17948	4.96471	12.4523	27.4188	32.9075	33.7034	24.2145	18.2664	16.4781	9.55247	2.63691	1.74896	2.44197	1.27792	1.70927	1.99341	4.03804	3.16579	2.8974	3.61959	2.88096	1.04437	0	0	0	0	0
1020	O=CCCl	CHLOROACETALDEHYDE	87.0648	0	0	0	0	0	0	0	0	0	0	0	0	0	0	0.336686	3.08242	4.63143	6.57027	7.02462	3.92092	5.04341	3.94898	5.21191	4.54815	3.20967	5.47828	5.03261	2.01204	5.49325	10.5904	8.2658	3.10435	2.15087	3.44482	4.42843	2.70733	2.44438	0.534698	0	0	0	0	0	0	0	0
1021	C[C@H]1CCC[C@H]1C	CIS-1,2-DIMETHYLCYCLOPENTANE	154.266	0	0	0	0	0	0	0	0	0	0	0	0	0	0	0	0	0	0	0	0	0	0.569328	12.6917	24.2156	32.3323	25.7006	19.2058	18.1559	17.912	1.80525	0	0	0	0	0	0	0	0	0	0	0	0	0	0	0	0
1022	CCCC(C)(C)CC	3,3-DIMETHYLHEXANE	188.409	0	0	0	0	0	0	0	0	0	0	0	0	0	0	0	0	0	0	0	0	0.010087	2.20451	18.4405	29.1842	35.785	21.136	24.4152	24.2644	22.0656	3.38138	0	0	0	0	0	0	0	0	0	0	0	0	0	0	0	0
1023	CC1(C)CO1	1,2-EPOXY-2-METHYLPROPANE	106.368	0	0	0	0	0	0	0	0	0	0	0	0	0	0	0	0	0	0	0.521988	4.02731	10.8418	13.8971	16.0016	10.4844	10.1655	13.4114	13.5253	3.87898	2.24413	1.17488	1.24309	1.45008	0.799616	1.28646	1.40371	2.49085	3.95231	2.15766	2.29537	0.92183	0.08986	0	0	0	0	0
1024	CCC(Cl)Cl	1,1-DICHLOROPROPANE	126.346	0	0	0	0	0	0	0	0	0	0	0	0	0	0	0.333581	2.02537	1.36842	1.35908	2.22426	4.40564	7.96653	9.47051	10.8222	12.462	8.12548	9.92944	13.4149	4.15329	6.97234	16.4762	12.8148	9.79697	0.03071	0	0	0	0	0	0	0	0	0	0	0	0	0
1025	FC(F)(F)C(F)(F)C(F)(F)C(F)(F)F	DECAFLUOROBUTANE	183.805	0	0	0	0	0	0	0	0	0	0	0	0	0	0	0	0	0	0	0	0	0.369378	1.04998	3.39861	3.83358	23.8188	91.4413	49.9846	0.150323	0	0	0	0	0	0	0	0	0	0	0	0	0	0	0	0	0	0
1026	COc1ccc(O)cc1	P-METHOXYPHENOL	154.354	0	0	0	0	0	0	0.101167	0.66528	1.35449	0.598746	0.738224	1.12496	0.978532	0.706154	0.948558	0.779433	0.746012	2.35489	5.84043	13.5765	13.6235	9.02392	9.24403	9.0603	6.273	6.21722	6.05815	4.56744	9.75976	10.0189	12.8038	10.7936	7.52412	3.95971	2.28087	4.2963	3.62585	1.09546	0	0	0	0	0	0	0	0
1027	C=CC(=O)OCCO	2-HYDROXYETHYL_ACRYLATE	145.65	0	0	0	0	0	0	0	0	0.291413	0.879748	1.37428	0.74266	0.566703	1.50172	0.694527	0.717186	1.48303	4.02346	8.72581	11.3167	12.6206	8.54453	9.66537	10.8807	11.9655	8.70702	5.62085	6.91255	7.25294	7.30849	4.34378	2.70018	3.22279	3.01947	5.4268	2.52985	6.65864	5.0476	2.30647	1.83062	0.27122	0	0	0	0	0
1028	C=C(C)C(=O)OCCO	2-HYDROXYETHYL_METHACRYLATE	168.821	0	0	0	0	0	0	0	0	0.282241	0.953676	1.43343	0.375172	1.0103	0.837301	1.27738	0.989505	1.03349	1.38156	4.59285	11.0276	15.0038	13.4632	10.5298	14.5262	14.7988	14.5478	11.4603	7.43504	7.27596	7.84402	4.3794	1.66097	2.23775	1.99902	5.27001	2.55775	5.7856	5.87552	2.46452	1.88467	0.283117	0	0	0	0	0
1029	C=C(C)C(=O)OC[C@H](C)O	2-HYDROXYPROPYL_METHACRYLATE	190.893	0	0	0	0	0	0	0	0	0.031024	0.507869	1.24422	0.916795	0.698807	0.440743	1.09003	1.11624	0.645892	1.32199	3.75682	9.55606	18.5285	17.766	14.8116	15.8811	16.8321	17.0716	15.0812	6.49206	7.00372	7.70725	4.03581	1.70424	2.76492	1.99642	4.95021	3.19409	5.16546	7.67688	2.63822	1.31516	0.422381	0	0	0	0	0
1030	CCCCCCOCCOCCO	2-(2-HEXOXYETHOXY)ETHANOL	266.779	0	0	0	0	0	0	0	0	0.162408	0.543198	1.57229	0.363501	0.90636	0.754448	1.6559	0.414475	0.744535	0.523725	1.56794	2.29121	9.43813	23.5566	34.6151	37.5197	38.6222	28.7053	20.3331	17.9457	11.1168	3.9363	2.45198	1.93029	1.58881	2.73605	5.16481	6.70076	3.56609	3.96853	4.81502	2.56829	0.790793	0	0	0	0	0
1031	CCC(C)(C)c1ccc(O)cc1	P-TERT-AMYLPHENOL	229.452	0	0	0	0	0	0	0.104983	0.702385	1.32686	0.577633	0.737227	1.22895	0.950519	0.668441	0.762871	0.864327	0.658183	1.47553	2.33392	5.99365	6.74543	12.8594	20.9772	20.0383	17.1097	15.7113	19.2816	21.5788	14.7405	8.09356	8.96088	10.7414	5.22075	3.461	0.813107	2.4233	2.59721	0.842925	0	0	0	0	0	0	0	0
1032	c1ccnnc1	PYRIDAZINE	100.981	0	0	0	0	0	0	0	0	0	0	0	0	0	0	0	0.053062	5.56137	12.8776	9.36878	4.63432	4.47906	4.84629	4.50246	5.36561	6.28882	8.68082	12.5561	3.76173	2.47088	1.59652	1.64317	2.58216	2.27623	1.32395	1.93558	3.16976	1.51808	2.27264	3.094	2.79688	2.29261	1.52521	0.149383	0	0	0
1033	O=C=Nc1ccccc1	PHENYL_ISOCYANATE	147.314	0	0	0	0	0	0	0	0	0	0	0	0	0	0	0	0	0.54145	2.21766	8.29926	10.3094	11.2847	9.25401	9.36454	12.5611	7.2528	8.88408	8.70668	13.3707	11.2168	13.2735	12.2171	13.1048	4.74409	0	0	0	0	0	0	0	0	0	0	0	0	0
1034	FC(F)(F)C(Cl)Cl	2,2-DICHLORO-1,1,1-TRIFLUOROETHANE	129.206	0	0	0	0	0	0	0	0	0	0	0	1.85928	2.06081	0.89333	2.06873	0.633424	0.320487	0.213059	0.705584	1.89274	5.21892	4.28781	2.08741	7.929	5.27355	6.7197	26.6832	41.0767	23.1923	1.78487	0	0	0	0	0	0	0	0	0	0	0	0	0	0	0	0
1035	O=C(O)CCCC(=O)O	GLUTARIC_ACID	155.915	0	0	0	0	0	0	0	1.34566	2.18732	0.616426	2.86713	2.69225	1.22447	0.39387	0.590859	1.30909	2.09142	1.62762	7.9631	12.3753	9.34405	13.7193	11.5273	8.27751	7.97133	5.63518	3.21255	2.49349	6.82294	5.53871	7.24452	2.88245	4.75393	9.53876	6.05085	9.27942	10.1353	3.38	0.077716	0	0	0	0	0	0	0
1036	O=C(O)c1ccccc1C(=O)O	PHTHALIC_ACID	183.274	0	0	0	0	0	0	1.22766	2.4231	0.322987	2.75068	3.25103	0.743462	0.580491	0.666376	1.30427	2.02178	1.30931	6.55742	10.4011	7.58415	5.2018	6.35856	8.70768	8.41409	6.90613	8.06382	11.8727	16.8524	16.2823	8.88728	4.45831	3.7487	6.52996	4.56154	4.18482	11.0656	6.85015	2.24743	0	0	0	0	0	0	0	0
1037	CCCCCCCCCCCCCCCCCCCCCCC	N-TRICOSANE	518.008	0	0	0	0	0	0	0	0	0	0	0	0	0	0	0	0	0	0	0	0	0	0.908128	22.441	80.3556	119.236	92.1176	81.7879	46.1312	49.1491	4.14375	0	0	0	0	0	0	0	0	0	0	0	0	0	0	0	0
1038	CCCCCCCCCCCCCCC(=O)O	N-PENTADECANOIC_ACID	359.903	0	0	0	0	0	0.262228	1.00314	0.834799	0.449753	0.743983	1.5829	1.01457	0.310419	0.367167	1.04547	1.22214	0.926442	2.76539	4.42139	3.2606	4.50272	5.47656	22.9624	53.8832	65.88	49.6639	41.716	25.8271	25.3139	3.24534	2.18449	2.82198	0.751506	2.7704	4.41721	6.56476	6.84263	2.84939	2.2009	0.592879	0	0	0	0	0	0
1039	CCCCCCCCCCCCCCCCC(=O)O	N-HEPTADECANOIC_ACID	403.078	0	0	0	0	0	0.289164	0.995948	0.815057	0.547246	0.666768	1.60159	1.01944	0.324505	0.303874	1.085	1.36274	0.81298	2.68239	4.40339	3.3085	4.48503	5.49431	23.7966	61.0912	75.5535	57.4784	48.5505	29.2829	29.1551	3.36877	2.19345	2.81861	0.800554	2.62958	4.34821	6.59397	6.81816	2.89507	2.25584	0.606847	0	0	0	0	0	0
1040	O=C(O)CCCCCCC(=O)O	SUBERIC_ACID	221.842	0	0	0	0	0	0	0	0.846115	2.61288	0.267779	2.85344	2.57524	1.64561	0.465121	0.559038	0.782755	2.4004	1.50877	2.66608	10.3378	8.10562	11.8967	26.1591	30.7722	23.1866	12.4095	10.7808	4.21849	6.98403	4.9711	7.09862	4.90655	2.29188	10.4623	5.78703	9.10503	10.9184	4.51647	0.431555	0	0	0	0	0	0	0
1041	O=C(O)CCCCCCCC(=O)O	AZELAIC_ACID	244.045	0	0	0	0	0	0	0	0.834155	2.61754	0.265104	2.84343	2.57608	1.65978	0.467964	0.55815	0.762432	2.41019	1.51601	2.48601	10.1825	8.00197	11.3078	25.6414	36.2905	28.7152	18.0124	11.8739	7.97662	6.93338	5.06612	7.08243	4.95297	2.21438	10.4239	5.92053	8.82373	11.1244	4.54546	0.442654	0	0	0	0	0	0	0
1042	C=CC(=O)OC[C@@H](CC)CCCC	2-ETHYLHEXYL_ACRYLATE	267.476	0	0	0	0	0	0	0	0	0	0	0	0	0	0	0	0	0.025092	1.95319	5.02472	6.46139	7.68256	11.3635	26.8596	35.3102	36.5583	32.1477	25.9595	25.6814	14.4817	5.69271	1.79445	2.05736	1.92832	1.17386	2.75992	1.58434	4.89918	3.87493	1.85105	0.105857	0	0	0	0	0	0
1043	C[C@H](O)CN	1-AMINO-2-PROPANOL	108.759	0	0	0	0	0	0	0	0	0	0.15165	0.544174	1.32166	0.409261	0.833059	1.12861	2.23348	2.13488	2.29328	3.77651	3.12662	9.68224	13.6944	13.6826	8.76958	7.74789	7.22917	8.92546	4.42548	2.48619	1.12606	1.77041	2.22892	1.52419	0.570138	2.3601	2.73111	1.61941	1.03092	2.26443	2.55379	2.24341	0.554435	0.75324	0.791531	0.961459	0.441549
1044	C#CCC=C	1-PENTENE-4-YNE	108.671	0	0	0	0	0	0	0	0	0	0	0	0	0.178178	0.430282	2.0953	1.72233	0.539711	2.16042	5.05571	8.65188	8.64661	9.29025	7.40137	6.95694	5.3536	5.32252	8.82576	9.38822	4.9363	4.37843	7.05743	11.5339	5.4185	8.92849	0.455641	0	0	0	0	0	0	0	0	0	0	0
1045	CCCCCCCCCOC=O	N-NONYL_FORMATE	251.589	0	0	0	0	0	0	0	0	0	0	0	0	0	0	0	0.024814	2.65948	2.72014	1.68871	4.09257	6.14061	11.0372	25.4281	40.3768	40.6902	31.715	25.4562	17.7375	14.013	2.85559	1.95594	3.06785	2.57308	2.99209	2.94509	4.54398	4.91718	2.55953	0.645228	0	0	0	0	0	0	0
1046	CCCCCCOCC	ETHYL_N-HEXYL_ETHER	200.801	0	0	0	0	0	0	0	0	0	0	0	0	0	0	0	0	0	0	0	0	1.13497	7.64001	29.2563	39.7619	36.5724	28.1216	22.2913	20.4545	10.2831	1.40075	0.475218	1.21193	1.38417	0.292662	0.575177	1.14793	2.59723	2.00836	0.802123	1.89681	0.505058	0	0	0	0	0
1047	CCCCCCCCCCCCCCCCCCCCO	1-EICOSANOL	463.081	0	0	0	0	0	0	0	0	0	0.251501	0.680001	1.53499	0.085102	0.828921	0.981636	1.27432	0.628341	0.576234	0.656246	1.40267	2.08217	5.98799	27.0489	72.7772	98.1323	76.194	63.4365	35.7975	36.1679	4.45497	1.12273	1.16867	0.782602	0.548957	1.18977	1.0815	1.45501	1.7009	1.76051	2.50312	1.96249	0.77253	0	0	0	0
1048	Cc1cc(C(C)(C)C)c(O)c(C(C)(C)C)c1	2,6-DI-TERT-BUTYL-P-CRESOL	310.569	0	0	0	0	0	0	0	0	0	0.006413	0.395547	0.274442	0.759319	0.170983	0.465223	0.513544	0.249912	1.06295	0.774947	1.18325	2.86549	22.5127	32.3255	32.843	29.5798	27.1123	34.6947	30.8777	16.9407	8.94669	12.2256	7.39575	6.45274	1.77401	0.018661	0	0	0	0	0	0	0	0	0	0	0
1049	C=CC(F)(F)F	3,3,3-TRIFLUOROPROPENE	98.9278	0	0	0	0	0	0	0	0	0	0	0	0	0	0	0	0.145441	2.90557	5.64026	5.44431	4.75993	3.66538	3.83469	4.36172	3.07825	3.96731	5.06764	6.29892	15.2511	30.3797	16.6267	0.55405	0	0	0	0	0	0	0	0	0	0	0	0	0	0	0
1050	C=C(C)C=O	METHACROLEIN	102.412	0	0	0	0	0	0	0	0	0	0	0	0	0	0	0	0	0	0.563304	3.05875	12.0659	12.9609	10.6184	6.84639	8.69548	7.71212	11.108	8.1612	4.48806	4.16363	4.86882	1.30395	1.20271	0.80109	2.50866	2.76357	4.06306	4.34746	2.64601	0.898256	0.331223	0	0	0	0	0	0
1051	CCC(CC)C(C)C	2-METHYL-3-ETHYLPENTANE	189.244	0	0	0	0	0	0	0	0	0	0	0	0	0	0	0	0	0	0	0	0	0.030329	3.02402	17.5676	25.3886	36.2095	25.1829	23.8623	28.2408	19.3494	2.11072	0	0	0	0	0	0	0	0	0	0	0	0	0	0	0	0
1052	C1=COCC1	2,3-DIHYDROFURAN	93.9979	0	0	0	0	0	0	0	0	0	0	0	0	0	0	0	0	0.299895	1.35831	3.33678	4.1861	10.2802	12.4508	10.614	9.8932	9.26185	7.2535	4.31542	3.6223	4.53299	2.78562	3.65606	5.49561	2.70752	3.2887	2.93256	2.179	1.74621	1.78619	0	0	0	0	0	0	0	0
1053	COc1cc(C=O)ccc1O	VANILLIN	179.757	0	0	0	0	0	0	0	0	0	0.48841	0.537142	0.827118	0.727064	0.128887	0.670788	0.726354	1.25502	2.34627	8.98888	16.3913	12.3858	11.4146	11.0412	9.40002	10.6508	10.7803	14.4179	14.1575	14.9817	7.63045	3.60468	2.81931	2.05822	4.36012	4.51258	3.72782	5.14384	3.22885	2.24129	0.620663	0.055331	0	0	0	0	0
1054	O=[N+]([O-])c1cc([N+](=O)[O-])c(O)c([N+](=O)[O-])c1	2,4,6-TRINITROPHENOL	210.77	0	0	0	0	0	0	0	0	0	0	0	0.010789	0.342174	0.937041	1.60736	4.26541	6.5962	8.80255	13.6933	16.5645	16.4882	9.97089	3.58567	4.8443	5.5245	6.16282	8.10817	8.83812	8.76542	16.6403	22.4513	17.6421	10.7818	8.84031	5.24537	2.08219	0.024591	0	0	0	0	0	0	0	0	0
1055	CCc1ccccc1CC	O-DIETHYLBENZENE	198.346	0	0	0	0	0	0	0	0	0	0	0	0	0	0	0	0	0	0	0.057504	4.26797	7.95553	21.5353	21.2309	24.1475	16.0128	19.8659	18.7248	15.7989	7.88669	7.55875	4.84096	9.90766	5.68353	5.29606	0.636688	0	0	0	0	0	0	0	0	0	0	0
1056	CCOC(=O)CC#N	ETHYL_CYANOACETATE	144.925	0	0	0	0	0	0	0	0	0	0	0	0	0	3.25415	5.41292	3.52626	2.32512	3.29345	5.90448	8.38463	11.6735	11.8187	13.5448	8.81123	5.93265	9.23902	7.49049	2.97145	4.10249	4.25278	3.25931	4.20611	6.11761	7.37056	8.54473	9.68175	5.79522	1.54766	0	0	0	0	0	0	0	0
1057	O=C=Nc1ccc(Cl)c(Cl)c1	3,4-DICHLOROPHENYL_ISOCYANATE	190.885	0	0	0	0	0	0	0	0	0	0	0	0	0	0	0	0.309386	3.90293	5.64591	4.26019	6.0083	6.90449	9.90582	10.2281	9.17344	14.8561	21.397	23.6069	22.6676	20.8445	16.4329	5.3683	9.89526	0.631615	0	0	0	0	0	0	0	0	0	0	0	0	0
1058	CCC(C)(CC)CC	3-METHYL-3-ETHYLPENTANE	187.571	0	0	0	0	0	0	0	0	0	0	0	0	0	0	0	0	0	0	0	0	0.109913	2.45543	17.4734	27.3242	33.3758	22.596	24.9615	27.1459	18.8204	2.47495	0	0	0	0	0	0	0	0	0	0	0	0	0	0	0	0
1059	CC(C)(c1ccc(O)cc1)c1ccc(O)cc1	BISPHENOL_A	288.137	0	0	0	0	0	0	0	0.709438	2.86913	1.2721	1.41227	2.32582	2.26186	1.33184	1.37419	1.87101	1.49233	2.44526	3.5584	7.57851	13.7585	18.8029	18.9384	20.7065	12.613	16.2122	17.7637	15.9304	17.1195	16.8759	18.4297	14.9383	6.51106	4.76722	2.50765	5.06358	5.00522	0.41033	0	0	0	0	0	0	0	0
1060	O=[N+]([O-])c1cccc([N+](=O)[O-])c1	M-DINITROBENZENE	172.343	0	0	0	0	0	0	0	0	0	0	0	0	0	0	0	0.397599	5.69274	9.1452	8.65957	6.87536	10.3397	12.177	18.708	14.9711	7.74338	6.25849	4.18275	3.71754	7.8152	6.02121	17.1643	14.0053	7.00364	5.23963	5.52947	4.96565	0.4604	0	0	0	0	0	0	0	0	0
1061	O=[N+]([O-])c1ccccc1[N+](=O)[O-]	O-DINITROBENZENE	174.458	0	0	0	0	0	0	0	0	0	0	0	0	0	0	0.537976	4.68604	10.6742	10.3673	6.6826	5.61107	5.07532	4.55974	7.92167	10.5344	9.69913	12.9584	11.0997	4.517	7.98144	12.0611	18.8542	12.0724	5.71459	5.92396	5.0881	1.83565	0	0	0	0	0	0	0	0	0	0
1062	CCC(C)(C)C(C)C	2,3,3-TRIMETHYLPENTANE	186.703	0	0	0	0	0	0	0	0	0	0	0	0	0	0	0	0	0	0	0	0	0	2.46429	22.3733	23.7374	32.7466	20.2098	23.2074	24.8541	21.2022	3.82777	0	0	0	0	0	0	0	0	0	0	0	0	0	0	0	0
1063	CCC(CC)C(C)(C)C	2,2-DIMETHYL-3-ETHYLPENTANE	210.375	0	0	0	0	0	0	0	0	0	0	0	0	0	0	0	0	0	0	0	0	0	2.35739	21.3626	28.3488	38.5079	22.8778	23.7787	27.672	23.5094	3.45579	0	0	0	0	0	0	0	0	0	0	0	0	0	0	0	0
1064	O=[N+]([O-])OCCO[N+](=O)[O-]	ETHYLENE_GLYCOL_DINITRATE	148.186	0	0	0	0	0	0	0	0	0	0	0	0	0	0	0	3.03968	10.7234	12.2219	8.47198	8.54416	5.8233	3.98828	3.67086	3.85787	5.38554	3.30328	5.42998	10.086	13.6091	21.9036	17.6859	16.4702	8.71771	0.283361	0	0	0	0	0	0	0	0	0	0	0	0
1065	O=[N+]([O-])OCC(CO[N+](=O)[O-])O[N+](=O)[O-]	NITROGLYCERINE	216.488	0	0	0	0	0	0	0	0	0	0	0	0	0	0.010399	1.8858	8.89365	10.9228	10.9924	8.13795	8.61007	7.46063	4.87097	5.54724	5.90128	7.82611	6.6719	11.3134	17.0066	32.5745	30.2914	23.3318	15.2634	3.83168	0	0	0	0	0	0	0	0	0	0	0	0	0
1066	CC(=O)Cl	ACETYL_CHLORIDE	86.9103	0	0	0	0	0	0	0	0	0	0	0	0	0	0	0	0.031733	3.08504	4.88541	6.75639	5.61491	5.0201	7.0495	7.62683	4.6228	2.39779	4.63301	4.74697	3.99299	6.6928	11.415	5.73703	6.15936	5.40362	4.31048	1.94549	0.178078	0	0	0	0	0	0	0	0	0	0
1067	CCCCCCCCCCOC(C)=O	N-DECYL_ACETATE	293.345	0	0	0	0	0	0	0	0	0	0	0	0	0	0	0	0	0	0.379499	3.04217	5.39655	9.42783	12.4193	27.5787	49.0849	53.0969	37.0733	29.766	19.3566	16.4807	3.5338	1.70836	1.85667	3.64242	2.46386	2.96765	2.67064	4.34298	4.1632	2.18449	0.362662	0	0	0	0	0	0
1068	C=C=CCC	1,2-PENTADIENE	112.397	0	0	0	0	0	0	0	0	0	0	0	0	0	0	0	0	0	0.170079	2.91081	4.40911	5.69811	12.0194	11.6447	14.5871	11.3682	12.1285	11.6796	9.49671	5.41816	7.63783	6.26331	8.29441	3.83237	1.53585	0	0	0	0	0	0	0	0	0	0	0	0
1069	CC=C=CC	2,3-PENTADIENE	111.486	0	0	0	0	0	0	0	0	0	0	0	0	0	0	0	0	0	0	0.162573	3.06479	8.17447	13.3927	15.6403	11.4694	12.3274	11.9716	13.7284	8.13523	4.8419	5.26057	7.65374	7.50602	5.85989	0.519931	0	0	0	0	0	0	0	0	0	0	0	0
1070	CCC[C@@H](C)C(C)(C)C	2,2,3-TRIMETHYLHEXANE	209.452	0	0	0	0	0	0	0	0	0	0	0	0	0	0	0	0	0	0	0	0	0	2.8037	21.8467	30.1493	37.7378	23.3993	25.0631	26.8935	24.744	3.94057	0	0	0	0	0	0	0	0	0	0	0	0	0	0	0	0
1071	CCCCCCCCCCCCCCCCCCCCCCCCC	N-PENTACOSANE	561.333	0	0	0	0	0	0	0	0	0	0	0	0	0	0	0	0	0	0	0	0	0	0.922939	23.9387	86.6099	129.331	99.7252	88.5092	48.6854	52.9268	4.88616	0	0	0	0	0	0	0	0	0	0	0	0	0	0	0	0
1072	Cc1c(N)cccc1N	2,6-DIAMINOTOLUENE	161.109	0	0	0	0	0	0	0	0	0	0	0	0	1.47569	4.72943	4.06219	4.43228	4.82543	6.10974	3.41666	4.80067	10.0631	12.8272	10.3844	7.59	7.26945	7.677	7.41052	6.16825	5.93455	4.90628	8.02169	6.4463	10.3339	6.96079	6.26155	3.74329	1.16539	0.860672	1.29549	1.58064	1.17581	1.20965	0.2546	0	0	0
1073	N#Cc1cccnc1	NICOTINONITRILE	131.536	0	0	0	0	0	0	0	0	0	0	0	0	0	0	0.075413	2.55459	7.20876	10.7249	6.79689	4.50922	4.1363	6.76863	10.0119	9.8759	10.928	11.3161	11.0746	4.16981	3.23402	2.42199	2.29331	4.01059	4.83093	4.34613	7.13688	4.96331	3.98195	1.7174	1.03652	0.976842	0.547448	0.183095	0	0	0	0
1074	Nc1ccc(N)cc1	P-PHENYLENEDIAMINE	141.792	0	0	0	0	0	0	0	0	0	0	0	0.937161	4.11555	4.47639	3.93251	4.05797	3.73311	5.24591	7.02586	7.87284	7.32207	6.52623	6.46733	4.74527	5.49421	4.61797	4.40582	3.93407	5.4063	5.72485	7.94377	5.35413	13.043	11.3248	9.29039	2.87393	2.45668	1.76421	0.110066	0	0	0	0	0	0	0
1075	F[C@@H](Cl)C(F)(F)Cl	1,2-DICHLORO-1,1,2-TRIFLUOROETHANE	128.796	0	0	0	0	0	0	0	0	0	0	0	0.50716	3.01803	1.41189	1.45275	1.0046	0.467702	0.186498	1.27435	2.63155	4.51387	2.96286	4.9088	6.75482	3.21713	8.24772	26.9039	39.2605	22.2227	3.7152	0	0	0	0	0	0	0	0	0	0	0	0	0	0	0	0
1076	C=C(CC)CCCC	2-ETHYL-1-HEXENE	185.452	0	0	0	0	0	0	0	0	0	0	0	0	0	0	0	0	0	0	0	0.016624	1.44433	7.77667	24.0296	32.622	26.9515	22.5649	21.5485	22.2373	9.63299	4.76565	3.40321	1.94678	2.63628	2.52124	1.51753	0.318452	0	0	0	0	0	0	0	0	0	0
1077	CCC(=O)OC(=O)CC	PROPIONIC_ANHYDRIDE	165.505	0	0	0	0	0	0	0	0	0	0	0	0	0	0	0	0	0	0.596605	8.66115	8.51366	14.3811	17.8072	23.373	19.0332	11.0598	10.3325	13.9989	7.25463	2.11641	3.10589	2.27526	4.16836	2.57436	2.51925	5.83324	8.87224	5.05302	2.45504	2.07934	0.15466	0	0	0	0	0	0
1078	COC[C@@H](C)OC(C)=O	PROPYLENE_GLYCOL_MONOMETHYL_ETHER_ACETATE	174.663	0	0	0	0	0	0	0	0	0	0	0	0	0	0	0	0	0	0	1.68748	7.14212	17.7824	25.124	20.3635	20.7476	22.135	11.4742	9.89021	5.14452	2.4981	2.53587	3.03746	3.00143	2.78306	3.37042	5.42401	4.85932	7.47826	3.56106	2.06745	0.035341	0	0	0	0	0	0
1079	C[C@@H](O)COC(C)(C)C	PROPYLENE_GLYCOL_1-TERT-BUTYL_ETHER	192.583	0	0	0	0	0	0	0	0	0	0	0	0	0	0	0.004224	0.438171	0.857007	0.167164	1.05434	1.14755	5.4471	23.0061	28.5645	26.394	17.9228	15.4935	26.0524	14.173	2.17315	2.18211	1.95694	1.49148	1.88606	1.48961	1.73277	2.47972	2.61864	2.26555	2.46233	2.60426	1.32528	0.14305	0	0	0	0
1080	CC(C)(C)CC(C)(C)c1ccc(O)cc1	P-TERT-OCTYLPHENOL	294.649	0	0	0	0	0	0	0.07727	0.691547	1.31343	0.58205	0.736355	1.21974	0.979743	0.653249	0.714639	0.896142	0.608803	1.37412	2.08431	5.4268	7.35046	12.7352	25.1952	29.4829	27.8056	17.8596	19.2855	25.6629	24.5834	10.8666	8.91661	7.9946	4.59153	4.21559	0.882211	2.41362	2.657	0.901794	0	0	0	0	0	0	0	0
1081	F/C(=C(/F)C(F)(F)F)C(F)(F)F	OCTAFLUORO-2-BUTENE	160.907	0	0	0	0	0	0	0	0	0	0	0	0	0	0	0	0	0	0.570553	4.64931	4.78047	3.97461	2.65809	3.48768	5.26734	8.74432	30.2072	73.1174	28.184	0	0	0	0	0	0	0	0	0	0	0	0	0	0	0	0	0	0
1082	CCCC1CCCC1	N-PROPYLCYCLOPENTANE	175.908	0	0	0	0	0	0	0	0	0	0	0	0	0	0	0	0	0	0	0	0	0	0.537739	11.9772	28.4858	38.0729	30.7385	25.9269	20.7581	18.8527	1.02949	0	0	0	0	0	0	0	0	0	0	0	0	0	0	0	0
1083	CCCCCCCC(C)C	2-METHYLNONANE	234.178	0	0	0	0	0	0	0	0	0	0	0	0	0	0	0	0	0	0	0	0	0	1.12549	17.3408	36.9994	51.6701	36.3341	34.191	26.9364	25.6156	2.67455	0	0	0	0	0	0	0	0	0	0	0	0	0	0	0	0
1084	CCCCCC[C@@H](C)CC	3-METHYLNONANE	232.944	0	0	0	0	0	0	0	0	0	0	0	0	0	0	0	0	0	0	0	0	0	1.67747	17.7078	35.3879	49.8715	35.4487	34.4364	31.0127	22.7087	2.31718	0	0	0	0	0	0	0	0	0	0	0	0	0	0	0	0
1085	CCCCC[C@@H](C)CCC	4-METHYLNONANE	233.207	0	0	0	0	0	0	0	0	0	0	0	0	0	0	0	0	0	0	0	0	0	1.43765	17.6102	36.8188	48.9274	35.2787	34.7589	30.6225	22.8357	2.45399	0	0	0	0	0	0	0	0	0	0	0	0	0	0	0	0
1086	CCCCC(C)CCCC	5-METHYLNONANE	233.055	0	0	0	0	0	0	0	0	0	0	0	0	0	0	0	0	0	0	0	0	0	1.44054	17.3143	36.5768	49.5349	34.9467	34.649	31.3182	22.5936	2.15541	0	0	0	0	0	0	0	0	0	0	0	0	0	0	0	0
1087	O=C(O)CO	GLYCOLIC_ACID	84.2575	0	0	0	0	0	0.198047	1.26585	0.632851	0.84935	1.65473	0.887082	0.223723	0.235177	1.29947	2.04666	0.714128	1.25915	5.84267	5.48472	4.70548	5.559	4.7268	4.55843	4.37739	3.29621	1.79408	3.10775	4.67	5.62859	2.78647	1.51513	3.12744	6.58818	3.93873	5.20839	3.97425	3.47385	2.46632	1.83435	1.2667	0	0	0	0	0	0
1088	CCCCCCCCCCCCCCN	N-TETRADECYLAMINE	338.385	0	0	0	0	0	0	0	0	0	0	0	0	0	0	0.082392	1.38138	3.03385	1.41036	2.87012	2.58855	2.70113	3.53625	22.5771	53.9859	69.8125	53.4128	45.5218	27.4595	26.6948	2.28786	1.61104	0.370327	1.2051	0.813773	0.400831	0.896075	0.754366	0.335433	0.246943	0.6498	1.25286	0.229455	0.898599	0.502331	1.27666	0.281949
1089	CCCCCCCCNCCCCCCCC	DI-N-OCTYLAMINE	380.652	0	0	0	0	0	0	0	0	0	0	0	0	0	0	0	0.411598	1.18566	0.913301	1.33206	0.885708	1.00412	4.11558	27.6628	62.866	81.5443	61.0281	51.5178	36.4089	28.3415	3.25498	1.75568	0.366191	0.383318	0.71043	0.442048	0.528109	0.369423	0.541979	0.315542	0.50427	1.61095	0.612127	0.474778	0.289227	0.385151	0.390464
1090	CCCC[C@@H](CC)CNC[C@H](CC)CCCC	DI-2-ETHYLHEXYLAMINE	380.095	0	0	0	0	0	0	0	0	0	0	0	0	0	0	0	0.044944	0.555571	1.02279	1.20806	1.11917	1.0028	1.82366	23.0293	52.9276	73.1492	55.817	51.9636	48.5967	31.337	3.86513	1.59327	1.05909	0.464762	0.120249	0	0	0	0	0	0	0	0	0	0	0	0
1091	CCCCCCCCCC#N	CAPRINITRILE	239.111	0	0	0	0	0	0	0	0	0	0	0	0	0	0	0	0	1.50736	4.9003	4.08656	4.07782	8.12942	13.1325	21.1489	35.0277	38.505	27.1351	23.0011	19.0749	13.519	1.33976	1.74306	1.05706	2.34569	2.44255	4.90547	5.70595	4.48543	3.36975	1.34082	0	0	0	0	0	0	0
1092	CCCCCNCCCCC	DIAMYLAMINE	249.579	0	0	0	0	0	0	0	0	0	0	0	0	0	0	0	0.329128	1.2628	0.777033	1.48438	0.922544	1.04826	4.20184	24.3002	41.9497	51.6358	37.4758	31.0285	28.7515	15.1783	2.80484	1.68973	0.303491	0.403414	0.669735	0.512259	0.458925	0.331433	0.571715	0.322988	0.648543	1.40075	0.624166	0.457778	0.309957	0.358089	0.385825
1093	CCCC(CC)CC	3-ETHYLHEXANE	190.314	0	0	0	0	0	0	0	0	0	0	0	0	0	0	0	0	0	0	0	0	0	1.19573	15.7448	28.8584	38.062	28.6281	27.6052	26.4287	18.6391	1.50684	0	0	0	0	0	0	0	0	0	0	0	0	0	0	0	0
1094	CCCC[C@H](C=O)CC	2-ETHYLHEXANAL	195.799	0	0	0	0	0	0	0	0	0	0	0	0	0	0	0	0	0	0	0	1.78891	4.76956	16.3593	28.3647	33.4866	26.5699	20.3088	21.3674	17.0018	3.53884	0.178911	2.52084	1.77888	0.811719	2.0128	3.51221	4.04809	3.09456	2.98301	1.46002	0.238146	0	0	0	0	0	0
1095	Cc1ccc(C=O)cc1	P-TOLUALDEHYDE	159.203	0	0	0	0	0	0	0	0	0	0	0	0	0	0	0	0	0	0.902655	7.21274	14.6393	14.2301	13.8179	10.446	11.0315	10.1768	14.6955	10.647	9.68029	11.1004	11.1258	4.53408	1.35542	1.00337	1.71708	2.88338	2.9788	5.16175	2.8329	1.55339	0.547804	0	0	0	0	0	0
1096	CCCCCCCCCCC=O	UNDECANAL	262.138	0	0	0	0	0	0	0	0	0	0	0	0	0	0	0	0	0	0	1.05456	6.8132	9.76962	12.5836	23.6199	39.4998	45.6248	34.7604	29.8194	18.9609	15.9878	1.46734	1.20121	0.931929	2.20579	1.59292	2.06253	4.63679	3.9731	2.69242	2.10784	0.546411	0	0	0	0	0	0
1097	CCCCCCCCCCCC=O	DODECANAL	284.264	0	0	0	0	0	0	0	0	0	0	0	0	0	0	0	0	0	0	0.946148	6.79928	9.66574	12.7524	24.4058	42.6397	50.9811	38.7727	33.0974	20.4277	17.8988	1.6579	1.20436	0.868719	2.35452	1.5127	2.05413	4.75584	3.91847	2.7082	2.11043	0.491839	0	0	0	0	0	0
1098	CCN(O)CC	N,N-DIETHYLHYDROXYLAMINE	130.778	0	0	0	0	0	0	0	0	0	0.455174	0.637203	0.496936	1.14919	0.816783	0.687828	0.696404	0.12442	0.477659	0.805965	1.85158	5.41056	8.9734	12.7082	18.494	17.7286	16.3287	12.7714	17.0972	4.66494	1.34457	1.49501	2.63447	0.503639	1.12939	1.38528	1.12403	3.51929	1.95688	2.17238	0.712703	0.562078	0.172054	0	0	0	0
1099	CCCCCCCCCCCCCCCCCCC(=O)O	N-NONADECANOIC_ACID	446.578	0	0	0	0	0	0.309707	0.978026	0.812437	0.536133	0.82532	1.62115	0.836588	0.168636	0.366152	1.32043	1.30676	0.751215	2.83442	4.12242	3.39134	4.57405	5.29904	25.195	67.4435	85.7298	65.9186	54.9757	32.1232	33.2413	3.80453	2.19854	2.82862	0.806559	2.61498	4.4871	6.55988	6.73642	2.9144	2.22506	0.603094	0	0	0	0	0	0
1100	C1CNCCN1	PIPERAZINE	117.425	0	0	0	0	0	0	0	0	0	0	0	0	0	0	0.589836	3.79681	1.87712	2.42773	1.97481	1.50531	4.61597	11.4296	12.9087	14.2865	21.0559	14.3985	10.0907	2.08123	1.39569	3.93522	1.80901	1.07716	0.75366	1.08004	0.953422	0.62048	0.796646	1.40986	1.42196	0.315224	2.20026	0.208025	1.14223	1.98968	0.685028	0.583397
1101	O=C1C=CC(=O)C=C1	QUINONE	127.821	0	0	0	0	0	0	0	0	0	0	0	0	0	0	0	0.480337	6.569	10.1567	6.15173	4.51535	4.94359	9.72168	15.7135	12.3787	9.22908	10.0092	4.69781	0.663861	1.11961	1.87262	2.5029	3.85399	4.97146	5.25222	6.54773	7.31917	4.96335	3.60302	0.012335	0	0	0	0	0	0	0
1102	O=C(O)c1ccccc1Cl	O-CHLOROBENZOIC_ACID	167.311	0	0	0	0	0	0	0.198194	1.2027	0.481181	0.865202	1.28805	1.0497	0.383794	0.194172	0.32471	1.06815	1.0798	6.35069	9.57766	7.00398	5.7583	5.74376	7.73413	7.84863	9.64619	12.8413	13.9764	15.0488	18.6828	13.1844	5.58533	3.25813	4.27242	2.73387	0.738768	3.50513	6.27356	0.740784	0	0	0	0	0	0	0	0
1103	O=C1OC(=O)c2ccccc21	PHTHALIC_ANHYDRIDE	161.141	0	0	0	0	0	0	0	0	0	0	0	0	0	0	0	0	1.75016	10.0217	12.691	8.14037	7.94807	11.3699	7.3655	12.7012	13.8861	12.7593	11.5533	3.42082	3.0671	2.35276	5.34404	8.11268	8.26589	10.2701	8.84423	4.12955	0.680752	0	0	0	0	0	0	0	0	0
1104	O=[N+]([O-])c1ccc([N+](=O)[O-])cc1	P-DINITROBENZENE	172.374	0	0	0	0	0	0	0	0	0	0	0	0	0	0	0	3.19055	7.7748	8.83817	6.4787	4.97013	10.5099	10.6296	9.9577	18.9866	10.6357	9.54565	3.83712	5.33424	6.34319	6.94195	17.6201	11.8929	7.26267	4.84236	5.08612	5.57331	0.810682	0	0	0	0	0	0	0	0	0
1105	C/C=C/C=O	TRANS-CROTONALDEHYDE	102.249	0	0	0	0	0	0	0	0	0	0	0	0	0	0	0	0	0	0.059685	2.35598	11.4031	14.5819	11.6096	9.65079	9.00824	11.7123	9.11015	4.29664	5.37285	4.69784	2.85685	0.984333	1.05053	1.10477	1.24738	2.64127	2.65741	4.66328	3.84625	2.49417	0.710265	0.14916	0	0	0	0	0
1106	C=C(C)CNCC	N-ETHYL-2-METHYLALLYLAMINE	155.766	0	0	0	0	0	0	0	0	0	0	0	0	0	0	0	0.376642	1.15361	0.97897	0.887036	1.19647	5.95836	15.5934	21.9002	22.4393	17.5288	16.491	18.1998	11.7245	6.07894	4.71097	3.8164	1.97121	2.75549	3.48061	2.60117	0.853285	0.684321	0.38215	0.500455	0.813181	0.464611	0.711134	0.190973	0.574453	0.099566	0
1107	CCCCCOC	METHYL_N-PENTYL_ETHER	158.317	0	0	0	0	0	0	0	0	0	0	0	0	0	0	0	0	0	0	0	0.927493	1.86574	9.09364	25.1329	29.7227	30.0292	21.4176	14.2679	14.7187	6.66026	1.86523	1.18771	1.34715	1.04778	0.683714	0.771693	1.31364	2.32516	1.54299	1.33736	2.13434	0.170283	0	0	0	0	0
1108	CCC1(C)CCCC1	1-METHYL-1-ETHYLCYCLOPENTANE	174.606	0	0	0	0	0	0	0	0	0	0	0	0	0	0	0	0	0	0	0	0	0	1.09007	16.0074	26.3008	32.5058	26.1224	20.9655	23.9874	19.2489	1.447	0	0	0	0	0	0	0	0	0	0	0	0	0	0	0	0
1109	CCCCCCC[C@H](C)O	2-NONANOL	224.169	0	0	0	0	0	0	0	0	0	0.062999	0.371085	1.23304	0.6882	0.286316	1.09949	1.02531	0.821397	0.555441	0.608664	1.59176	1.9428	9.08654	19.3356	34.3304	38.473	30.0564	29.4235	21.9573	16.0651	2.12134	1.49992	1.02849	0.64769	0.688607	0.783638	1.39288	1.02381	1.60461	1.605	1.74669	1.61181	0.910393	0.007094	0	0	0
1110	FC(C(F)(F)F)C(F)(F)F	1,1,1,2,3,3,3-HEPTAFLUOROPROPANE	138.433	0	0	0	0	0	0	0	0	0	0	0.633308	2.67628	1.41985	1.70114	1.03001	0.425757	0.174163	0.345164	0.787848	0.947175	2.46243	1.27735	2.10497	3.06194	4.37904	19.5354	52.8798	38.8127	7.12172	0.447424	0	0	0	0	0	0	0	0	0	0	0	0	0	0	0	0
1111	O=C(O)c1cccnc1	NIACIN	141.943	0	0	0	0	0	0	0.150718	1.30957	0.306202	1.09381	1.50723	0.991546	0.254432	0.274326	0.34271	1.15839	0.829322	3.26453	9.65049	8.07895	5.25638	4.98635	8.30199	11.1208	12.9844	15.319	13.0002	5.08338	4.74332	4.86578	3.89826	3.06363	5.82352	3.31296	2.20334	7.77476	3.95815	1.33712	0.646892	1.23221	0.777746	0.397628	0	0	0	0
1112	CC(C)(C)c1ccc(O)c(O)c1	P-TERT-BUTYLCATECHOL	217.642	0	0	0	0	0	0	0.485843	1.25491	0.829483	0.854672	1.6974	2.16909	1.28929	1.08209	0.72562	1.88496	1.97188	1.85266	1.85669	5.39748	5.9215	11.9743	18.0651	17.8854	13.6574	12.6424	14.5638	23.0292	13.1346	10.0708	9.2985	9.3423	8.74598	5.56888	2.01263	2.84907	2.54359	0.304948	0	0	0	0	0	0	0	0
1113	c1ccc2c(c1)Oc1ccccc1O2	DIBENZO-P-DIOXIN	211.446	0	0	0	0	0	0	0	0	0	0	0	0	0	0	0	0	0.077495	3.7422	14.2766	15.8213	12.5497	11.9999	9.53026	9.79161	11.3852	9.65673	14.2705	21.6592	14.0238	22.0121	17.2454	13.7057	5.25379	0.041445	0	0	0	0	0	0	0	0	0	0	0	0
1114	Clc1cccc2c1Oc1ccccc1O2	1-CHLORODIBENZO-P-DIOXIN	234.157	0	0	0	0	0	0	0	0	0	0	0	0	0	0	0	0	0.695056	6.75336	14.4081	12.1771	11.5118	10.7119	10.4244	10.2771	11.7144	14.6788	21.9929	21.7557	22.787	27.3871	15.6271	9.58678	2.39103	0.075572	0	0	0	0	0	0	0	0	0	0	0	0
1115	Clc1ccc2c(c1)Oc1ccccc1O2	2-CHLORODIBENZO-P-DIOXIN	233.877	0	0	0	0	0	0	0	0	0	0	0	0	0	0	0	0.215055	2.44781	8.38523	12.641	10.7181	11.5355	9.52408	8.76731	11.1791	9.75491	16.1963	20.6384	23.9593	27.6112	28.0446	13.9062	8.98618	1.41542	0	0	0	0	0	0	0	0	0	0	0	0	0
1116	Clc1ccc2c(c1)Oc1ccc(Cl)cc1O2	2,7-DICHLORODIBENZO-P-DIOXIN	256.719	0	0	0	0	0	0	0	0	0	0	0	0	0	0	0	0.653546	5.73361	12.4326	8.64148	7.10217	10.4096	5.69068	11.3926	9.69423	10.2913	24.488	24.0052	30.3576	39.8597	29.8069	10.8166	3.55142	0.053466	0	0	0	0	0	0	0	0	0	0	0	0	0
1117	Clc1cc(Cl)c2c(c1Cl)Oc1ccccc1O2	1,2,4-TRICHLORODIBENZO-P-DIOXIN	277.759	0	0	0	0	0	0	0	0	0	0	0	0	0	0	0.130837	1.18183	2.11072	4.49942	10.7047	8.96406	10.1049	15.0007	8.29218	14.2419	27.261	23.908	25.9682	28.3161	33.548	25.8516	13.8849	4.98038	0.307333	0	0	0	0	0	0	0	0	0	0	0	0	0
1118	Clc1c(Cl)c(Cl)c2c(c1Cl)Oc1ccccc1O2	1,2,3,4-TETRACHLORODIBENZO-P-DIOXIN	297.813	0	0	0	0	0	0	0	0	0	0	0	0	0	0	0	0	0.700173	4.0777	9.41917	8.96007	15.1727	12.497	9.28942	24.3513	34.8011	15.0561	21.1338	37.7003	36.993	27.874	12.0843	2.87274	0	0	0	0	0	0	0	0	0	0	0	0	0	0
1119	Clc1ccc2c(c1)Oc1cc(Cl)c(Cl)c(Cl)c1O2	1,2,3,7-TETRACHLORODIBENZO-P-DIOXIN	299.484	0	0	0	0	0	0	0	0	0	0	0	0	0	0	0.199606	2.20406	5.52048	6.74108	5.54083	7.31592	9.13323	11.4578	9.2951	14.5556	31.3392	30.2333	24.0591	40.5007	38.769	30.5886	8.50543	0.923708	0	0	0	0	0	0	0	0	0	0	0	0	0	0
1120	Clc1cc(Cl)c2c(c1)Oc1c(Cl)cc(Cl)cc1O2	1,3,6,8-TETRACHLORODIBENZO-P-DIOXIN	301.427	0	0	0	0	0	0	0	0	0	0	0	0	0	0	0.281235	3.79687	7.37275	3.06926	5.0533	7.36241	5.8407	14.4776	9.50414	9.81477	33.7296	30.2457	40.2398	34.6193	39.4872	26.1554	7.44643	2.07709	0	0	0	0	0	0	0	0	0	0	0	0	0	0
1121	Clc1ccc2c(c1)Oc1c(Cl)c(Cl)c(Cl)c(Cl)c1O2	1,2,3,4,7-PENTACHLORODIBENZO-P-DIOXIN	320.622	0	0	0	0	0	0	0	0	0	0	0	0	0	0	0.033688	0.951739	4.31841	6.03327	4.27248	6.92103	14.2943	9.86076	11.2188	26.0374	35.5088	21.0026	23.7872	47.9436	44.4404	28.061	6.71073	0.656011	0	0	0	0	0	0	0	0	0	0	0	0	0	0
1122	Clc1cc2c(cc1Cl)Oc1c(Cl)c(Cl)c(Cl)c(Cl)c1O2	1,2,3,4,7,8-HEXACHLORODIBENZO-P-DIOXIN	342.097	0	0	0	0	0	0	0	0	0	0	0	0	0	0	0.569678	3.25522	3.19125	1.13974	4.41178	5.58183	14.2723	13.0983	9.39771	31.1639	41.3948	26.8575	29.51	42.4061	48.9183	27.87	5.42106	0.037545	0	0	0	0	0	0	0	0	0	0	0	0	0	0
1123	Clc1cc2c(c(Cl)c1Cl)Oc1c(Cl)c(Cl)c(Cl)c(Cl)c1O2	1,2,3,4,6,7,8-HEPTACHLORODIBENZO-P-DIOXIN	363.673	0	0	0	0	0	0	0	0	0	0	0	0	0	0	0.475674	1.78927	1.37494	0.846648	3.72368	4.93242	19.1702	11.1782	10.9815	42.4639	43.4449	21.4278	25.6323	54.2891	52.8054	24.0566	2.7024	0.012414	0	0	0	0	0	0	0	0	0	0	0	0	0	0
1124	Clc1c(Cl)c(Cl)c2c(c1Cl)Oc1c(Cl)c(Cl)c(Cl)c(Cl)c1O2	OCTOCHLORODIBENZO-P-DIOXIN	385.595	0	0	0	0	0	0	0	0	0	0	0	0	0	0	0	0	0	0.536112	2.7277	5.57272	24.1134	9.22042	16.8873	54.3906	34.1033	15.2919	33.4858	57.9945	61.2389	16.3064	2.45665	0	0	0	0	0	0	0	0	0	0	0	0	0	0	0
1125	CC(C)(c1ccccc1)C(C)(C)c1ccccc1	2,3-DIMETHYL-2,3-DIPHENYLBUTANE	330.171	0	0	0	0	0	0	0	0	0	0	0	0	0	0	0	0	0	0	0.284006	10.9841	20.9774	26.3379	28.0468	26.025	20.8057	19.3118	22.7956	23.6762	14.157	14.0993	11.3048	16.2247	8.79064	5.08107	0.342777	0	0	0	0	0	0	0	0	0	0	0
1126	NC1CCCC1	CYCLOPENTYLAMINE	125.815	0	0	0	0	0	0	0	0	0	0	0	0	0	0	0.248499	1.19889	3.48691	0.685871	2.54261	3.50821	2.26671	2.54968	10.918	19.9401	23.8189	19.2477	10.8172	12.8471	7.15754	1.8032	0.601723	1.01897	0.656548	0.431972	0.587336	0.547844	1.03307	0.468907	0.056367	0.24568	1.1608	1.18452	0.255222	0.177056	0.731926	0.660232
1127	Cc1c([N+](=O)[O-])cccc1[N+](=O)[O-]	2,6-DINITROTOLUENE	193.033	0	0	0	0	0	0	0	0	0	0	0	0	0	0	0	1.94353	7.82805	9.68257	10.1017	8.94918	8.42032	9.52094	9.12351	17.1193	13.2919	10.4988	10.7027	4.25938	4.08612	7.52372	14.5384	15.8183	9.15061	5.26804	4.74558	5.70382	0.991521	0	0	0	0	0	0	0	0	0
1128	CC1(O)CCCCC1	1-METHYLCYCLOHEXANOL	161.009	0	0	0	0	0	0	0	0	0	0	0.394301	0.70044	1.0934	0.543946	0.376026	1.21423	1.00376	0.450018	0.745198	1.19035	1.91636	6.22616	17.2582	23.4242	24.916	18.9815	19.9638	14.7964	4.31924	2.36041	0.671008	0.501268	0.97533	0.482501	1.44923	0.35479	1.01236	3.06977	1.23473	1.46104	2.4671	0.327779	0	0	0	0
1129	CCC(C)(C)CC(C)C	2,4,4-TRIMETHYLHEXANE	210.09	0	0	0	0	0	0	0	0	0	0	0	0	0	0	0	0	0	0	0	0	0.141075	2.90299	20.7258	29.9935	37.7588	24.2567	23.9545	25.9722	24.7907	3.98134	0	0	0	0	0	0	0	0	0	0	0	0	0	0	0	0
1130	Oc1cccc2cccnc12	8-HYDROXYQUINOLINE	171.767	0	0	0	0	0	0	0	0	0	0	0	0	0	0.830761	0.362241	0.795174	0.613564	4.28133	13.1597	14.3119	10.3307	7.84154	6.21724	6.95078	7.11179	7.78613	13.158	19.2372	17.0818	12.247	9.79183	6.20961	3.42394	2.61864	3.55337	2.64091	1.6726	0	0	0	0	0	0	0	0	0
1131	CC[C@H](Cl)CCl	1,2-DICHLOROBUTANE	142.95	0	0	0	0	0	0	0	0	0	0	0	0	0	0	0	0	0.689473	4.47727	7.19909	6.64818	8.72834	12.2817	10.5549	10.4618	12.7732	6.09763	12.9944	11.7835	4.06871	4.72064	17.0312	13.0752	7.0062	1.25673	0	0	0	0	0	0	0	0	0	0	0	0
1132	Cc1ccc(N)cc1N	2,4-DIAMINOTOLUENE	162.095	0	0	0	0	0	0	0	0	0	0	0.035042	1.26677	4.85676	3.24263	3.69965	4.69774	3.70622	5.29118	3.78098	4.793	9.07299	10.7695	9.59898	6.73696	8.71749	6.89304	6.59724	6.54424	6.66693	7.21337	6.32464	5.42414	9.52252	13.3054	9.02029	5.88749	2.11804	0.267962	0	0	0	0	0	0	0	0
1133	C1=C[C@@H]2CC[C@H]1C2	2-NORBORNENE	131.807	0	0	0	0	0	0	0	0	0	0	0	0	0	0	0	0	0	0	0	1.09675	3.36899	7.54402	16.7871	18.6719	17.8551	15.8188	16.7926	16.7272	7.75803	2.27145	2.64443	3.72336	1.32934	1.80452	0.567095	0.733168	0.113363	0	0	0	0	0	0	0	0	0
1134	C=CC(=O)OCCC	N-PROPYL_ACRYLATE	156.008	0	0	0	0	0	0	0	0	0	0	0	0	0	0	0	0	0.036858	2.19197	5.20196	6.40864	8.48144	15.9435	17.8815	19.786	16.4616	16.0604	12.0128	9.3831	5.74601	6.63707	4.01627	2.14015	2.93329	2.54692	3.42449	1.97026	4.1227	4.7033	0.416802	0	0	0	0	0	0	0
1135	C=CC(=O)OC(C)C	ISOPROPYL_ACRYLATE	157.48	0	0	0	0	0	0	0	0	0	0	0	0	0	0	0	0	0	1.73847	4.90855	6.1442	10.2616	15.3252	18.3325	13.4911	16.4288	17.1227	16.233	9.14329	5.80664	6.40701	3.13506	3.5452	1.67688	1.63359	3.08548	1.29179	4.11734	3.67342	1.64252	0.140646	0	0	0	0	0	0
1136	CCC[C@@H](C)CC=O	3-METHYLHEXANAL	174.211	0	0	0	0	0	0	0	0	0	0	0	0	0	0	0	0	0	0	0.690862	5.89175	8.87868	11.1163	24.0217	25.5085	22.4855	17.8039	18.5949	15.3262	3.77319	0.452841	1.49814	1.46226	1.07943	1.92559	3.49752	4.3258	3.30023	2.94589	1.5801	0.278856	0	0	0	0	0	0
1137	CC(C)(C)C1CCCCC1	TERT-BUTYLCYCLOHEXANE	213.346	0	0	0	0	0	0	0	0	0	0	0	0	0	0	0	0	0	0	0	0	0	0.388764	14.1224	32.3443	41.5769	29.903	29.2979	24.8955	20.9571	0.819672	0	0	0	0	0	0	0	0	0	0	0	0	0	0	0	0
1138	c1ccc(C(c2ccccc2)c2ccccc2)cc1	TRIPHENYLMETHANE	325.63	0	0	0	0	0	0	0	0	0	0	0	0	0	0	0	0	0	0	4.73991	24.3125	31.8211	24.1318	21.8663	16.1408	18.2763	13.1779	16.6125	13.1745	22.1148	17.3665	26.8957	24.656	11.3612	0.776301	0	0	0	0	0	0	0	0	0	0	0	0
1139	CCCCCCCCCCC1CCCC1	N-DECYLCYCLOPENTANE	329.151	0	0	0	0	0	0	0	0	0	0	0	0	0	0	0	0	0	0	0	0	0	0.584067	15.8296	52.9156	71.3743	59.2926	49.8067	32.0835	32.3117	2.03056	0	0	0	0	0	0	0	0	0	0	0	0	0	0	0	0
1140	CCCCCCCCCCC1CCCCC1	N-DECYLCYCLOHEXANE	345.564	0	0	0	0	0	0	0	0	0	0	0	0	0	0	0	0	0	0	0	0	0	0.443328	14.7979	54.4624	76.4789	61.1045	52.9211	36.8427	28.9186	2.18292	0	0	0	0	0	0	0	0	0	0	0	0	0	0	0	0
1141	C=CCCCC(C)C	6-METHYL-1-HEPTENE	185.628	0	0	0	0	0	0	0	0	0	0	0	0	0	0	0	0	0	0	0	0.708231	4.3263	8.25933	23.7236	29.1892	29.6747	21.0874	20.0216	18.2045	15.823	4.35476	2.41053	3.39559	3.3798	2.18658	1.98742	0.082241	0	0	0	0	0	0	0	0	0	0
1142	O=C(O)/C=C/C(=O)O	FUMARIC_ACID	127.564	0	0	0	0	0	0	1.00215	2.52548	0.92184	2.52351	3.16328	0.931542	0.311669	0.667734	1.72581	2.1118	1.93252	3.50578	3.02806	2.08193	4.4267	7.07788	13.3604	11.3331	8.42894	5.24728	1.87081	6.35811	6.52442	5.62044	2.73604	3.43293	11.4495	5.69059	4.52805	12.7407	3.8901	0.453061	0	0	0	0	0	0	0	0
1143	C(=C\c1ccccc1)\c1ccccc1	CIS-STILBENE	243.503	0	0	0	0	0	0	0	0	0	0	0	0	0	0	0	0	0	0	4.43431	21.7821	24.118	19.1021	15.0933	12.2166	11.3301	12.0736	10.1951	15.7615	17.4622	18.387	24.785	18.123	5.09415	0.031244	0	0	0	0	0	0	0	0	0	0	0	0
1144	c1cncnc1	PYRIMIDINE	100.208	0	0	0	0	0	0	0	0	0	0	0	0	0	0	0	0	1.73418	10.5229	10.5425	5.87999	4.04928	4.43403	5.37693	4.44549	7.44616	12.7905	11.2398	4.12544	4.28578	2.14707	0.911569	3.06272	3.55639	0.743818	1.96126	3.60109	1.83475	1.5965	1.53405	2.36985	1.65261	0.773483	0	0	0	0
1145	FC(F)(Cl)C(F)(F)C(F)(F)Cl	1,3-DICHLOROHEXAFLUOROPROPANE	172.922	0	0	0	0	0	0	0	0	0	0	0	0	0	0	0	0	0	0.771934	2.02813	4.22159	0.006719	4.32376	6.00906	2.42402	8.3632	53.7774	70.6364	13.0573	0	0	0	0	0	0	0	0	0	0	0	0	0	0	0	0	0	0
1146	O=C(OOC(=O)c1ccccc1)c1ccccc1	BENZOYL_PEROXIDE	281.013	0	0	0	0	0	0	0	0	0	0	0	0	0	0	0	0	0	4.28908	20.2765	21.1789	15.4284	15.3721	16.7942	15.6992	15.1061	21.9861	20.8251	20.9972	22.3423	22.4207	6.84773	2.97435	6.49041	5.7884	12.5338	6.02135	0	0	0	0	0	0	0	0	0	0
1147	C=C(CC(=O)O)C(=O)O	ITACONIC_ACID	150.411	0	0	0	0	0	0	0.188548	2.3493	1.01477	1.71058	2.89719	2.46216	0.624108	0.377869	0.683778	2.00308	3.34082	5.93658	7.44044	6.17703	4.496	6.79731	8.60659	9.25539	9.12588	4.67002	5.70363	7.69373	7.66087	7.42363	6.06383	3.44039	4.93194	7.53419	4.05472	9.74683	9.55386	1.60867	0	0	0	0	0	0	0	0
1148	CC(=O)Oc1ccccc1C(=O)O	ACETYLSALICYLIC_ACID	206.191	0	0	0	0	0	0	0.006373	0.90743	0.833068	0.534591	1.47118	1.01278	0.628842	0.255164	0.313745	0.725117	0.980178	2.5284	10.537	14.3713	12.0899	9.71979	12.0271	15.525	14.009	12.3124	13.2179	12.8198	13.0707	6.28265	5.80866	4.81034	6.84818	7.63855	4.61697	8.27194	4.51867	1.7345	0	0	0	0	0	0	0	0
1149	COC(=O)c1ccc(C(=O)OC)cc1	DIMETHYL_TEREPHTHALATE	227.029	0	0	0	0	0	0	0	0	0	0	0	0	0	0	0	0	0	0.229087	7.17973	19.7301	16.6486	15.797	21.6855	20.7266	17.87	15.6075	21.2083	17.867	6.43251	6.55295	5.31907	4.21394	2.17988	6.15673	3.3523	6.79872	10.0667	1.11476	0	0	0	0	0	0	0	0
1150	c1ccc(C(c2ccccc2)(c2ccccc2)c2ccccc2)cc1	TETRAPHENYLMETHANE	413.953	0	0	0	0	0	0	0	0	0	0	0	0	0	0	0	0	0	0	3.09038	26.5148	31.8761	30.3449	28.0662	21.0552	21.4703	19.5811	19.3658	21.3156	31.4095	20.0618	31.3674	31.2483	3.46334	0	0	0	0	0	0	0	0	0	0	0	0	0
1151	O=C1CCCC[C@@H]1C1CCCCC1	2-CYCLOHEXYL_CYCLOHEXANONE	245.478	0	0	0	0	0	0	0	0	0	0	0	0	0	0	0	0	0	0	0	1.26268	5.74814	15.1108	26.0216	36.5698	38.988	31.2585	24.2183	15.5386	7.5454	1.33573	1.03251	0.974267	0.797625	1.23385	2.01032	1.21499	4.3551	4.01297	1.65985	1.43031	0.225968	0	0	0	0	0
1152	c1ccc(CC(c2ccccc2)c2ccccc2)cc1	1,1,2-TRIPHENYLETHANE	349.747	0	0	0	0	0	0	0	0	0	0	0	0	0	0	0	0	0	0	0.260931	13.3838	30.085	36.1336	28.3109	21.1061	19.1928	18.0142	17.7316	17.8341	23.1418	23.2486	26.3752	21.835	5.53048	0.119246	0	0	0	0	0	0	0	0	0	0	0	0
1153	C(=C(c1ccccc1)c1ccccc1)c1ccccc1	TRIPHENYLETHYLENE	337.095	0	0	0	0	0	0	0	0	0	0	0	0	0	0	0	0	0	0	6.32308	28.9492	27.6755	24.5969	20.5554	15.9873	17.6763	15.0986	15.1743	20.5538	24.2516	24.3071	32.0241	20.6512	7.29874	0	0	0	0	0	0	0	0	0	0	0	0	0
1154	c1ccc(NNc2ccccc2)cc1	HYDRAZOBENZENE	233.323	0	0	0	0	0	0	0	0	0.724846	1.74449	2.09049	1.24898	2.21002	1.2042	1.37124	3.9067	2.35541	2.27208	6.07016	12.9408	16.9834	15.0507	12.4985	10.6724	10.3631	13.845	9.8223	7.63846	12.4676	23.5519	13.3424	17.007	14.8973	13.1704	2.30311	0	0	0	0	0	0	0	0	0	0	0
1155	Clc1ccc(Cl)c(-c2ccccc2)c1Cl	2,3,6-TRICHLOROBIPHENYL(PCB_24)	273.338	0	0	0	0	0	0	0	0	0	0	0	0	0	0	0	0.229217	3.22213	5.03919	8.09699	13.523	13.9668	14.7198	10.5811	8.97499	15.5561	25.7427	20.5047	26.3943	28.5118	27.124	13.1319	8.4516	2.42023	0.005396	0	0	0	0	0	0	0	0	0	0	0	0
1156	Clc1ccccc1-c1c(Cl)cccc1Cl	2,2',6-TRICHLOROBIPHENYL(PCB_19)	275.331	0	0	0	0	0	0	0	0	0	0	0	0	0	0	0	0	1.01369	9.54399	14.5135	12.3257	12.0935	9.98496	13.4189	6.89087	9.5943	20.7853	15.5644	23.0563	34.0871	38.8802	18.505	1.62386	0	0	0	0	0	0	0	0	0	0	0	0	0	0
1157	Clc1ccc(-c2ccccc2Cl)c(Cl)c1	2,2',4-TRICHLOROBIPHENYL(PCB_17)	272.625	0	0	0	0	0	0	0	0	0	0	0	0	0	0	0	0.228472	2.60465	8.18566	12.7332	13.0012	11.0067	9.69461	13.4532	6.06407	11.3532	20.9086	23.1585	26.3509	34.6834	35.4593	17.3216	0.929219	0	0	0	0	0	0	0	0	0	0	0	0	0	0
1158	Clc1ccccc1-c1cccc(Cl)c1Cl	2,2',3-TRICHLOROBIPHENYL(PCB_16)	270.967	0	0	0	0	0	0	0	0	0	0	0	0	0	0	0	0	0.429398	6.90152	14.1897	14.5027	12.0163	11.9311	11.8626	6.84875	12.1706	19.108	21.0736	23.2233	33.8958	35.7547	19.0964	0.799978	0	0	0	0	0	0	0	0	0	0	0	0	0	0
1159	Clc1ccc(-c2c(Cl)cccc2Cl)cc1	2,4',6-TRICHLOROBIPHENYL(PCB_32)	273.975	0	0	0	0	0	0	0	0	0	0	0	0	0	0	0	0	1.14593	12.6821	13.2447	10.597	10.9373	9.58141	12.9875	6.50872	9.26997	21.9934	19.3922	30.83	35.9373	36.7626	15.6686	0.980393	0.039218	0	0	0	0	0	0	0	0	0	0	0	0	0
1160	Clc1cccc(-c2cccc(Cl)c2Cl)c1	2,3,3'-TRICHLOROBIPHENYL(PCB_20)	270.466	0	0	0	0	0	0	0	0	0	0	0	0	0	0	0	0	1.12635	9.40331	12.7594	12.4422	11.6227	10.3167	11.9587	6.07043	13.6007	21.3498	23.3353	27.7803	38.6605	35.2104	14.3474	0.322583	0	0	0	0	0	0	0	0	0	0	0	0	0	0
1161	Clc1ccc(-c2cccc(Cl)c2Cl)cc1	2,3,4'-TRICHLOROBIPHENYL(PCB_22)	269.945	0	0	0	0	0	0	0	0	0	0	0	0	0	0	0	0	0.832407	10.6325	12.7734	12.4095	10.5145	10.691	11.7147	5.98917	12.8798	21.0328	23.7279	28.4745	38.3489	36.474	13.4667	0.399475	0	0	0	0	0	0	0	0	0	0	0	0	0	0
1162	Clc1cccc(-c2cc(Cl)cc(Cl)c2)c1	3,3',5-TRICHLOROBIPHENYL(PCB_36)	270.734	0	0	0	0	0	0	0	0	0	0	0	0	0	0	0	0.528359	5.62241	10.6094	9.1042	10.0122	9.25949	7.81597	12.151	5.73103	13.0279	23.8642	27.5753	40.2721	38.0478	35.1261	8.03439	0	0	0	0	0	0	0	0	0	0	0	0	0	0	0
1163	Clc1ccc(-c2ccc(Cl)c(Cl)c2)cc1	3,4,4'-TRICHLOROBIPHENYL(PCB_37)	270.627	0	0	0	0	0	0	0	0	0	0	0	0	0	0	0	0.067476	2.80242	12.1602	13.1148	8.7828	9.71479	9.85231	10.3227	6.47954	13.2061	20.2463	27.4795	31.4754	43.7049	35.5852	9.73802	0	0	0	0	0	0	0	0	0	0	0	0	0	0	0
1164	Clc1ccc(Cl)c(-c2cc(Cl)ccc2Cl)c1	2,2',5,5'-TETRACHLOROBIPHENYL(PCB_52)	295.416	0	0	0	0	0	0	0	0	0	0	0	0	0	0	0	0.42785	7.18689	12.4502	7.79849	8.79922	8.72751	8.03677	13.7441	5.68788	14.1619	28.9708	25.7218	36.1448	44.779	35.5096	8.64973	0.010903	0	0	0	0	0	0	0	0	0	0	0	0	0	0
1165	Clc1ccc(Cl)c(-c2c(Cl)cccc2Cl)c1	2,2',5,6'-TETRACHLOROBIPHENYL(PCB_53)	298.07	0	0	0	0	0	0	0	0	0	0	0	0	0	0	0	0.300585	5.10201	13.193	9.40179	9.08131	8.472	11.1086	11.6306	5.44025	13.9169	26.8461	18.5658	35.2689	47.5077	39.7105	5.70269	0	0	0	0	0	0	0	0	0	0	0	0	0	0	0
1166	Clc1ccc(-c2ccc(Cl)cc2Cl)c(Cl)c1	2,2',4,4'-TETRACHLOROBIPHENYL(PCB_47)	294.901	0	0	0	0	0	0	0	0	0	0	0	0	0	0	0	0.598427	5.92046	11.4284	8.29183	9.97692	7.38137	10.7713	11.4276	4.91043	16.3071	26.9675	29.8563	36.0226	45.4076	34.2941	6.52909	0	0	0	0	0	0	0	0	0	0	0	0	0	0	0
1167	Clc1ccc(Cl)c(-c2cccc(Cl)c2Cl)c1	2,2',3,5'-TETRACHLOROBIPHENYL(PCB_44)	296.649	0	0	0	0	0	0	0	0	0	0	0	0	0	0	0	0.148074	4.46614	10.9553	11.5802	9.46367	8.71454	11.7863	11.0238	5.10905	16.5316	27.3833	23.3838	35.2991	43.7412	37.237	8.39677	0	0	0	0	0	0	0	0	0	0	0	0	0	0	0
1168	Clc1ccccc1-c1ccc(Cl)c(Cl)c1Cl	2,2',3,4-TETRACHLOROBIPHENYL(PCB_41)	295.19	0	0	0	0	0	0	0	0	0	0	0	0	0	0	0	0.129383	2.71198	7.63198	11.1	12.0958	11.2944	13.4223	9.32103	8.17838	20.6585	24.5588	23.0806	30.2957	37.3463	38.4196	11.8225	0.349475	0	0	0	0	0	0	0	0	0	0	0	0	0	0
1169	Clc1ccc(-c2cc(Cl)c(Cl)cc2Cl)cc1	2,4,4',5-TETRACHLOROBIPHENYL(PCB_74)	291.946	0	0	0	0	0	0	0	0	0	0	0	0	0	0	0.062388	1.14012	3.7244	8.52695	10.7756	8.43387	8.63432	11.484	9.33672	6.98713	22.6265	31.0131	32.8924	30.0367	42.4796	33.9168	7.68056	0	0	0	0	0	0	0	0	0	0	0	0	0	0	0
1170	Clc1ccc(-c2ccc(Cl)c(Cl)c2Cl)cc1	2,3,4,4'-TETRACHLOROBIPHENYL(PCB_60)	291.636	0	0	0	0	0	0	0	0	0	0	0	0	0	0	0	0.125644	2.77	10.1104	10.6131	10.1661	9.68509	12.8605	8.5813	7.99881	20.5163	29.1562	24.2854	34.9567	39.6811	37.038	8.53286	0.109462	0	0	0	0	0	0	0	0	0	0	0	0	0	0
1171	Clc1ccc(Cl)c(-c2ccc(Cl)c(Cl)c2)c1	2,3',4',5-TETRACHLOROBIPHENYL(PCB_70)	292.543	0	0	0	0	0	0	0	0	0	0	0	0	0	0	0	0.214135	5.8351	11.138	8.73079	8.75683	7.99241	11.0064	9.76328	6.97459	17.1965	28.6983	30.7669	40.5429	43.1342	30.8077	7.58589	0	0	0	0	0	0	0	0	0	0	0	0	0	0	0
1172	Clc1ccc(-c2ccc(Cl)c(Cl)c2)cc1Cl	3,3',4,4'-TETRACHLOROBIPHENYL(PCB_77)	291.343	0	0	0	0	0	0	0	0	0	0	0	0	0	0	0	1.26122	7.15893	10.3913	7.95998	7.67557	6.43852	13.4554	8.8891	5.0557	19.9054	27.8607	33.0721	38.3242	46.6397	28.2613	8.40296	0	0	0	0	0	0	0	0	0	0	0	0	0	0	0
1173	Clc1cc(Cl)c(-c2cccc(Cl)c2Cl)c(Cl)c1	2,2',3,4',6'-PENTACHLOROBIPHENYL(PCB_98)	319.503	0	0	0	0	0	0	0	0	0	0	0	0	0	0	0.163164	2.11891	4.75968	7.44869	9.48035	8.19503	7.02078	16.1278	6.50719	6.78531	29.0188	24.8162	35.0439	33.6247	51.7345	30.7149	4.29949	0	0	0	0	0	0	0	0	0	0	0	0	0	0	0
1174	Clc1ccc(Cl)c(-c2c(Cl)ccc(Cl)c2Cl)c1	2,2',3,5',6-PENTACHLOROBIPHENYL(PCB_95)	319.691	0	0	0	0	0	0	0	0	0	0	0	0	0	0	0	1.16009	8.44988	10.2731	6.09473	8.26193	7.04494	13.103	9.78503	5.75199	25.2016	26.9684	28.0163	38.7716	50.6835	34.0398	4.05743	0	0	0	0	0	0	0	0	0	0	0	0	0	0	0
1175	Clc1ccc(Cl)c(-c2cc(Cl)cc(Cl)c2Cl)c1	2,2',3,5,5'-PENTACHLOROBIPHENYL(PCB_92)	319.135	0	0	0	0	0	0	0	0	0	0	0	0	0	0	0.128584	2.26014	7.6143	6.88475	7.54299	7.88224	6.83702	13.2125	8.72813	7.51869	27.3332	32.6867	33.3207	35.9033	50.3132	32.8053	3.21564	0	0	0	0	0	0	0	0	0	0	0	0	0	0	0
1176	Clc1ccc(Cl)c(-c2ccc(Cl)c(Cl)c2Cl)c1	2,2',3,4,5'-PENTACHLOROBIPHENYL(PCB_87)	318.309	0	0	0	0	0	0	0	0	0	0	0	0	0	0	0	0.53477	7.0952	10.4231	6.56234	8.58678	8.46714	12.8537	8.2143	8.71892	25.6217	30.6779	26.9063	40.8092	47.4638	35.1334	3.85485	0	0	0	0	0	0	0	0	0	0	0	0	0	0	0
1177	Clc1ccc(-c2ccc(Cl)c(Cl)c2Cl)c(Cl)c1	2,2',3,4,4'-PENTACHLOROBIPHENYL(PCB_85)	317.691	0	0	0	0	0	0	0	0	0	0	0	0	0	0	0	0.61437	6.66291	9.78147	6.97325	8.83074	8.0405	14.1956	7.03948	7.69857	27.5291	28.7541	30.105	40.1359	47.1784	35.0151	2.97522	0	0	0	0	0	0	0	0	0	0	0	0	0	0	0
1178	Clc1cc(Cl)cc(-c2cc(Cl)c(Cl)cc2Cl)c1	2,3',4,5,5'-PENTACHLOROBIPHENYL(PCB_120)	316.414	0	0	0	0	0	0	0	0	0	0	0	0	0	0	0.122885	2.82938	7.24414	5.21626	6.58262	7.44362	6.71078	13.0805	8.02107	8.09854	31.4529	36.2697	40.0002	37.1592	46.2643	30.0048	2.69789	0	0	0	0	0	0	0	0	0	0	0	0	0	0	0
1179	Clc1ccc(-c2cc(Cl)c(Cl)cc2Cl)cc1Cl	2,3',4,4',5-PENTACHLOROBIPHENYL(PCB_118)	313.782	0	0	0	0	0	0	0	0	0	0	0	0	0	0	0.106397	1.67743	5.83178	7.59943	7.78121	6.88256	6.59613	14.7664	5.87021	9.06968	31.013	36.8181	35.1968	36.3608	47.0195	28.2762	5.02837	0	0	0	0	0	0	0	0	0	0	0	0	0	0	0
1180	Clc1cccc(-c2c(Cl)ccc(Cl)c2Cl)c1Cl	2,2',3,3',6-PENTACHLOROBIPHENYL(PCB_84)	318.003	0	0	0	0	0	0	0	0	0	0	0	0	0	0	0	0.478489	5.75671	10.511	8.43528	8.88058	7.96652	15.3308	7.28472	7.27492	25.3825	23.7994	28.4562	35.2682	48.35	34.7042	6.2931	0	0	0	0	0	0	0	0	0	0	0	0	0	0	0
1181	Clc1cc(Cl)c(-c2c(Cl)ccc(Cl)c2Cl)cc1Cl	2,2',3,4',5',6-HEXACHLOROBIPHENYL(PCB_149)	340.969	0	0	0	0	0	0	0	0	0	0	0	0	0	0	0.287616	3.33263	7.30716	5.89939	5.60662	6.74172	6.55115	16.568	5.01457	10.4816	36.0305	30.146	33.7845	44.6741	52.1498	27.2212	2.20738	0	0	0	0	0	0	0	0	0	0	0	0	0	0	0
1182	Clc1ccc(-c2cc(Cl)c(Cl)c(Cl)c2Cl)c(Cl)c1	2,2',3,4,4',5-HEXACHLOROBIPHENYL(PCB_137)	337.281	0	0	0	0	0	0	0	0	0	0	0	0	0	0	0.087023	1.55424	5.61441	6.07233	6.87695	7.19013	10.6077	12.5921	5.97951	17.1782	38.8349	26.5311	27.9325	47.8923	50.6278	30.3021	1.02575	0	0	0	0	0	0	0	0	0	0	0	0	0	0	0
1183	Clc1cc(Cl)c(Cl)c(-c2ccc(Cl)c(Cl)c2Cl)c1	2,2',3,3',4,5'-HEXACHLOROBIPHENYL(PCB_130)	339.409	0	0	0	0	0	0	0	0	0	0	0	0	0	0	0.104768	2.36716	7.3327	5.25874	6.57287	6.81721	8.02332	16.0664	3.92307	12.5349	38.6712	32.0454	33.3642	41.5968	51.5342	29.8492	1.95652	0	0	0	0	0	0	0	0	0	0	0	0	0	0	0
1184	Clc1cccc(-c2cc(Cl)c(Cl)c(Cl)c2Cl)c1Cl	2,2',3,3',4,5-HEXACHLOROBIPHENYL(PCB_129)	337.743	0	0	0	0	0	0	0	0	0	0	0	0	0	0	0.148722	1.09475	3.14192	6.75509	8.5381	8.07399	11.5727	13.8261	4.20867	20.194	36.319	26.3712	24.6786	44.9784	52.672	28.9431	3.53154	0	0	0	0	0	0	0	0	0	0	0	0	0	0	0
1185	Clc1cc(Cl)c(Cl)c(-c2c(Cl)ccc(Cl)c2Cl)c1	2,2',3,3',5,6'-HEXACHLOROBIPHENYL(PCB_135)	341.061	0	0	0	0	0	0	0	0	0	0	0	0	0	0	0.273965	2.92608	7.72943	5.63629	5.7329	6.7787	6.80467	16.5593	5.07741	11.2178	32.9286	30.9692	36.6522	43.1406	53.0289	26.6801	1.88476	0	0	0	0	0	0	0	0	0	0	0	0	0	0	0
1186	Clc1ccc(Cl)c(-c2c(Cl)c(Cl)cc(Cl)c2Cl)c1Cl	2,2',3,3',5,6,6'-HEPTACHLOROBIPHENYL(PCB_179)	362.932	0	0	0	0	0	0	0	0	0	0	0	0	0	0	0.545317	2.88292	5.76309	5.30156	3.75699	6.19633	11.4014	13.736	3.66677	19.1473	36.0882	32.7731	29.8029	59.0903	48.5449	23.1213	0.609417	0	0	0	0	0	0	0	0	0	0	0	0	0	0	0
1187	CCNc1nc(Cl)nc(NC(C)C)n1	ATRAZINE	256.701	0	0	0	0	0	0	0	0	0	0	0.175137	1.55365	1.21131	1.96038	1.98205	1.79551	1.51786	0.456825	1.23138	3.68541	9.15271	24.6366	27.0773	21.712	26.0124	25.9259	27.7466	13.1198	13.0616	11.1215	7.32758	6.88262	5.97018	4.26703	3.40383	3.2132	2.94039	3.04048	1.43878	0.253394	0	0	0	0	0	0
1188	CCOc1cc(C=O)ccc1O	ETHYL_VANILLIN	201.578	0	0	0	0	0	0	0	0	0	0	0.367974	0.957657	0.439228	0.57084	0.330412	0.891016	0.893051	2.87766	5.93749	13.6437	15.3337	15.8568	14.7433	12.7124	12.7269	17.1442	17.7243	14.5191	14.1866	8.28601	3.41352	2.79931	1.97836	4.39241	4.48175	3.83035	5.10065	3.37677	2.27324	0.627783	0.065585	0	0	0	0	0
1189	FN(F)N(F)F	TETRAFLUOROHYDRAZINE	86.436	0	0	0	0	0	0	0	0	0	0	0	0	0	0	0	0	0	0	0.006143	0.862556	0.7429	1.3041	3.37259	8.05449	17.0258	26.1595	30.8206	13.4116	0	0	0	0	0	0	0	0	0	0	0	0	0	0	0	0	0	0
1190	Clc1ccc(-c2ccc(Cl)c(Cl)c2)c(Cl)c1	2,3',4,4'-TETRACHLOROBIPHENYL(PCB_66)	293.334	0	0	0	0	0	0	0	0	0	0	0	0	0	0	0	0.396609	4.94594	10.594	9.72124	8.21573	7.99939	11.0824	10.0614	5.27566	19.0147	28.6812	34.1693	38.3561	45.3399	29.4751	6.16802	0	0	0	0	0	0	0	0	0	0	0	0	0	0	0
1191	Clc1cc(Cl)c(-c2c(Cl)cccc2Cl)c(Cl)c1	2,2',4,6,6'-PENTACHLOROBIPHENYL(PCB_104)	321.059	0	0	0	0	0	0	0	0	0	0	0	0	0	0	0.170369	2.14266	4.74895	8.89844	9.19765	7.52923	6.74369	15.6988	7.36198	6.31948	25.5373	23.9594	27.6656	38.0379	57.0322	30.3075	1.07404	0	0	0	0	0	0	0	0	0	0	0	0	0	0	0
1192	Clc1ccc(-c2ccc(Cl)c(Cl)c2Cl)cc1Cl	2,3,3',4,4'-PENTACHLOROBIPHENYL(PCB_105)	313.757	0	0	0	0	0	0	0	0	0	0	0	0	0	0	0	0.370866	5.49157	9.47588	7.40143	8.7376	7.83664	15.7361	5.52224	9.11396	28.8823	33.1831	28.9511	41.2996	43.8566	31.7321	5.90032	0	0	0	0	0	0	0	0	0	0	0	0	0	0	0
1193	Clc1cc(Cl)c(-c2c(Cl)c(Cl)cc(Cl)c2Cl)c(Cl)c1Cl	2,2',3,3',4,5',6,6'-OCTACHLOROBIPHENYL(PCB_201)	384.5	0	0	0	0	0	0	0	0	0	0	0	0	0	0	1.21047	3.75232	1.63209	2.91682	3.20685	4.84197	15.6599	10.8309	2.40122	32.8481	41.7532	35.145	31.6747	64.3866	50.8369	16.0615	0	0	0	0	0	0	0	0	0	0	0	0	0	0	0	0
1194	Clc1cc(-c2cc(Cl)c(Cl)c(Cl)c2Cl)c(Cl)c(Cl)c1Cl	2,2',3,3',4,4',5,5'-OCTACHLOROBIPHENYL(PCB_194)	380.813	0	0	0	0	0	0	0	0	0	0	0	0	0	0	0.481991	3.17326	2.19905	2.54229	3.98482	5.22024	16.1631	10.4664	3.67566	42.4323	47.2399	24.5758	26.453	62.1948	56.4721	21.1085	0	0	0	0	0	0	0	0	0	0	0	0	0	0	0	0
1195	Clc1cc(Cl)c(-c2c(Cl)c(Cl)c(Cl)c(Cl)c2Cl)c(Cl)c1Cl	2,2',3,3',4,4',5,6,6'-NONACHLOROBIPHENYL(PCB_207)	404.785	0	0	0	0	0	0	0	0	0	0	0	0	0	0	0.610297	1.83096	0.856179	1.42492	3.22225	4.87682	20.6527	5.6223	8.16162	48.6288	35.9356	23.7314	47.7867	65.1701	56.345	8.44384	0	0	0	0	0	0	0	0	0	0	0	0	0	0	0	0
1196	Clc1cccc(Cl)c1-c1c(Cl)cccc1Cl	2,2',6,6'-TETRACHLOROBIPHENYL(PCB_54)	298.124	0	0	0	0	0	0	0	0	0	0	0	0	0	0	0	0	2.1699	14.8412	11.2189	9.22288	8.92727	12.7434	10.794	5.98676	13.4719	23.2844	12.0436	30.5584	47.619	44.4597	5.64059	0	0	0	0	0	0	0	0	0	0	0	0	0	0	0
1197	Clc1cccc(-c2cccc(Cl)c2Cl)c1Cl	2,2',3,3'-TETRACHLOROBIPHENYL(PCB_40)	295.112	0	0	0	0	0	0	0	0	0	0	0	0	0	0	0	0	1.81884	10.9568	12.3739	10.5833	10.3793	13.1583	9.47953	5.72458	17.9281	24.8175	22.9007	31.195	44.2872	35.4236	10.9795	0	0	0	0	0	0	0	0	0	0	0	0	0	0	0
1198	Clc1cc(Cl)c(Cl)c(-c2ccccc2)c1Cl	2,3,5,6-TETRACHLOROBIPHENYL(PCB_65)	294.297	0	0	0	0	0	0	0	0	0	0	0	0	0	0	0.253276	1.59168	1.33384	1.35437	8.55722	12.5584	13.5394	18.2213	5.30199	14.6361	31.4211	27.6533	15.5498	29.9389	33.7364	27.8018	10.5002	7.39255	1.1064	0	0	0	0	0	0	0	0	0	0	0	0	0
1199	ClC1=C(Cl)C(Cl)(Cl)C(Cl)=C1Cl	HEXACHLOROCYCLOPENTADIENE	232.556	0	0	0	0	0	0	0	0	0	0	0	0	0	0	0	0	0	0.384512	2.14681	8.84677	8.69013	3.60348	17.1242	22.4216	11.6687	17.2092	38.1915	48.5666	31.33	2.31505	0	0	0	0	0	0	0	0	0	0	0	0	0	0	0	0
1200	CC(=O)c1ccccc1O	2-HYDROXYACETOPHENONE	164.605	0	0	0	0	0	0	0	0	0	0	0	0	0	0	0	0	0.105565	3.623	12.625	13.3768	12.2503	9.13061	7.94591	12.4116	12.2893	8.62791	10.3812	11.9718	8.61925	11.0152	9.96983	3.17423	3.78685	2.77181	4.08048	4.16208	3.1121	1.56342	0.17569	0	0	0	0	0	0	0
1201	CN(C)C(=O)Nc1ccc(Cl)cc1	MONURON	230.561	0	0	0	0	0	0	0	0	0	0.03063	0.8445	0.931557	0.657266	0.69066	1.37629	1.00546	1.86698	3.36274	8.18111	12.0878	13.3142	16.1119	17.3835	16.325	13.1903	10.6535	14.4079	15.0763	25.0681	24.3014	14.3508	0.602817	0.870377	0.893906	1.43932	2.69828	1.80555	2.02926	3.66991	2.26898	0.005543	0	0	0	0	0
1202	Clc1cc(Cl)c(-c2ccc(Cl)c(Cl)c2Cl)cc1Cl	2,2',3,4,4',5'-HEXACHLOROBIPHENYL(PCB_138)	339.154	0	0	0	0	0	0	0	0	0	0	0	0	0	0	0.139731	2.48917	6.85078	5.3653	6.7714	6.73276	7.8782	16.2341	4.19433	11.9458	39.5856	34.4554	28.7155	43.5648	49.8792	30.8939	2.1953	0	0	0	0	0	0	0	0	0	0	0	0	0	0	0
1203	Clc1cc(Cl)cc(-c2cc(Cl)cc(Cl)c2)c1	3,3',5,5'-TETRACHLOROBIPHENYL(PCB_80)	293.738	0	0	0	0	0	0	0	0	0	0	0	0	0	0	0	2.75303	10.1596	6.60659	5.52774	7.60267	5.69327	10.6327	11.3481	3.55842	23.1425	25.5978	47.4751	41.4486	39.9188	31.4622	3.2063	0	0	0	0	0	0	0	0	0	0	0	0	0	0	0
1204	Clc1ccc(-c2ccccc2)c(Cl)c1Cl	2,3,4-TRICHLOROBIPHENYL(PCB_21)	269.685	0	0	0	0	0	0	0	0	0	0	0	0	0	0	0	0.089839	1.82149	4.31737	8.47806	13.5965	14.5959	16.3417	8.19649	9.50227	18.548	26.0668	19.616	29.2727	30.479	25.4116	12.5971	7.96896	1.42941	0	0	0	0	0	0	0	0	0	0	0	0	0
1205	Clc1ccc(-c2ccccc2Cl)cc1Cl	2,3',4'-TRICHLOROBIPHENYL(PCB_33)	270.813	0	0	0	0	0	0	0	0	0	0	0	0	0	0	0	0	1.89752	7.30438	12.6146	13.1981	10.9117	12.2636	10.3645	6.58024	13.8807	21.4242	24.5427	30.6243	37.2523	32.7256	14.6425	0.371334	0	0	0	0	0	0	0	0	0	0	0	0	0	0
1206	Clc1cc(-c2cc(Cl)c(Cl)c(Cl)c2)cc(Cl)c1Cl	3,3',4,4',5,5'-HEXACHLOROBIPHENYL(PCB_169)	334.285	0	0	0	0	0	0	0	0	0	0	0	0	0	0	1.30142	5.19125	4.26309	3.91704	4.31671	4.6743	9.9339	14.5483	3.72829	14.2078	43.9092	38.8915	33.3841	44.2575	44.6677	31.4142	1.25798	0	0	0	0	0	0	0	0	0	0	0	0	0	0	0
1207	CC(C)Cc1ccc([C@H](C)C(=O)O)cc1	IBUPROFEN	281.266	0	0	0	0	0	0	0	0.838029	0.948101	0.331835	1.60478	1.31067	0.544163	0.129752	0.34866	0.754987	1.00886	0.610798	1.3931	6.4814	11.197	17.3318	27.202	28.9965	25.8683	20.7994	22.0961	21.6047	16.9729	11.6869	12.1071	5.79651	3.2684	4.92339	2.09307	4.28074	4.98268	0.961532	0	0	0	0	0	0	0	0
1208	Clc1cccc(-c2ccccc2)c1Cl	2,3-DICHLOROBIPHENYL(PCB_5)	248.592	0	0	0	0	0	0	0	0	0	0	0	0	0	0	0	0	0.426403	4.24428	10.4313	14.6017	16.8768	13.195	12.7685	7.63436	11.9921	17.3679	18.8658	23.4681	27.9656	24.5442	16.6962	8.58694	2.3896	0	0	0	0	0	0	0	0	0	0	0	0	0
1209	Clc1cncc(Cl)c1	3,5-DICHLOROPYRIDINE	149.952	0	0	0	0	0	0	0	0	0	0	0	0	0	0	0.140597	1.48994	2.75563	4.6858	5.41812	3.69676	4.37883	7.49705	4.22106	8.07514	24.0889	18.4236	13.7189	16.8584	22.4154	6.08826	1.13065	1.94874	0.850387	1.37511	1.02518	1.23451	0.973713	0.892018	1.12365	0.647963	0.293974	0	0	0	0	0
1210	Oc1cncc(Cl)c1	5-CHLORO-3-PYRIDINOL	138.732	0	0	0	0	0	0.187476	0.843375	1.51216	0.837748	0.382109	1.57347	1.06903	1.07582	0.504762	1.26387	1.84139	1.81044	2.87967	4.9661	5.38341	3.03516	4.94223	4.66937	4.55281	8.62086	15.0726	19.0507	11.7375	13.6282	11.7389	3.50827	2.3137	2.66687	3.51163	3.6683	2.08514	1.25428	1.04505	0.938624	1.10869	0.66612	0.293051	0	0	0	0
1211	Nc1ncc(Cl)cc1Cl	2-AMINO-3,5-DICHLOROPYRIDINE	164.313	0	0	0	0	0	0	0	0	0	0	0	0.857648	2.14974	2.29045	2.05083	2.96787	3.95624	3.12469	4.58981	4.49186	3.54339	5.91032	5.93365	5.69505	12.9194	17.1094	20.3749	16.6454	19.3869	14.4183	4.423	1.78645	3.68132	1.14265	2.16622	1.41718	1.63345	1.44183	0.916112	0.366351	0.024878	0	0	0	0	0
1212	Oc1ccccn1	2-HYDROXYPYRIDINE	115.837	0	0	0	0	0	0	0	0	0.30445	1.18583	0.216317	1.36896	0.813976	0.78501	0.532853	0.315701	0.340827	1.98313	6.66272	9.8722	8.12032	6.14052	5.51898	4.10563	6.06288	5.17022	11.8273	11.8002	13.9635	7.83594	3.59808	3.71346	2.11748	2.67096	3.14078	3.60377	1.07562	0.460246	1.0127	1.03111	0.018478	0	0	0	0	0
1213	Oc1cccnc1	3-HYDROXYPYRIDINE	116.344	0	0	0	0	0	0	0.234734	1.19632	0.941929	0.785482	0.987925	1.43778	0.718699	0.47322	0.915943	0.695062	1.31618	2.26356	6.38191	8.18579	7.37036	5.85917	4.41625	4.62378	6.01173	6.29855	10.3462	10.9799	11.6669	6.00377	4.62397	2.9878	2.03541	3.31204	3.76869	3.4448	1.44046	1.27448	1.06626	0.67217	1.34766	0.70551	0.321075	0	0	0
1214	Nc1ccc([N+](=O)[O-])cn1	2-AMINO-5-NITROPYRIDINE	150.226	0	0	0	0	0	0	0	0	0	0.188164	1.86554	2.29961	2.96878	3.46727	1.53097	2.42332	3.15398	5.84741	6.05353	5.92812	4.65948	4.47077	7.9099	9.91262	14.6985	11.4529	8.22014	4.38719	3.66391	5.88697	4.76662	7.22856	12.4112	6.3887	5.96885	2.87953	3.43253	2.91984	1.31799	0.487919	0	0	0	0	0	0
1215	Nc1cccnc1Cl	3-AMINO-2-CHLOROPYRIDINE	141.677	0	0	0	0	0	0	0	0	0	0	0.104013	0.986063	1.50294	2.30517	2.31292	2.57981	2.70004	3.36259	6.23347	7.6362	6.593	5.37455	6.16432	4.59562	7.77641	11.1829	11.4717	11.0597	19.0939	10.8614	5.50609	3.41416	2.95755	2.14411	2.42691	1.87956	1.72833	2.24117	1.33543	0.953018	0.387081	0	0	0	0	0
1216	Nc1ccc(Cl)cn1	2-AMINO-5-CHLOROPYRIDINE	142.894	0	0	0	0	0	0	0	0	0	0	0	0.800539	2.28025	2.06957	3.21663	2.06691	3.09523	5.45948	6.57787	6.22859	5.96229	4.63036	5.41721	5.21384	4.50018	9.14355	10.9203	18.2824	16.4937	13.6194	7.55596	2.18724	1.31587	3.9282	1.24173	2.09547	1.77066	1.46023	1.2286	1.0846	0.715143	0.052083	0	0	0	0
1217	Nc1ccccn1	2-AMINOPYRIDINE	120.547	0	0	0	0	0	0	0	0	0	0	0	0.273585	1.59718	1.99155	2.5367	2.49833	2.52406	2.59684	4.4173	8.08725	9.38891	8.83553	6.43367	5.4294	4.59587	5.25195	6.60058	8.41949	10.1362	13.1983	7.23224	1.86673	2.56444	1.48143	3.966	1.54329	1.94797	1.55551	1.93129	0.525886	1.03389	0.889812	0.129326	0	0	0
1218	Nc1ccncc1	3-AMINOPYRIDINE	121.201	0	0	0	0	0	0	0	0	0	0	0	0.823971	3.26234	2.06355	2.94047	3.20732	2.31565	2.82225	4.63795	7.24222	8.31471	7.5248	6.02696	4.95118	4.58817	5.11625	7.38397	8.94538	9.60624	12.8526	5.39297	3.31212	1.86415	1.36862	2.97836	2.44851	1.03123	2.11041	2.27583	0.911545	0.715929	1.2135	1.05985	0.51566	0.034851	0
1219	Nc1ncccc1O	2-AMINO-3-HYDROXYPYRIDINE	130.576	0	0	0	0	0	0	0	0	0	0.189593	0.676703	1.61983	2.91411	2.44361	3.38834	3.76448	2.33895	2.28626	3.928	6.99179	7.81691	6.4354	5.86838	3.7605	6.05552	7.16538	7.14712	10.2014	10.3908	11.2887	5.99553	3.43475	3.92335	3.59122	5.25473	3.39919	2.45448	1.6047	0.959464	0.84032	1.06725	0.221221	0	0	0	0
1220	Oc1c(I)cc(I)cc1I	2,4,6-TRIIODOPHENOL	236.74	0	0	0	0	0	0	0	0	0	0.16287	0.439332	0.97539	0.508674	0.430804	0.716104	1.48784	4.05692	6.78267	8.50214	5.27727	3.39853	7.09336	12.5471	8.0245	11.8414	19.5293	33.2631	39.121	25.4842	21.8124	3.25064	2.67415	1.36967	2.49513	1.79846	0	0	0	0	0	0	0	0	0	0	0
1221	O=C(O)c1ccc(Cl)nc1	6-CHLORONICOTINIC-ACID	163.298	0	0	0	0	0	0	0.310595	1.33673	0.228366	1.38935	1.43618	0.734233	0.207376	0.280311	0.581155	1.2775	3.17754	6.52184	4.54397	4.19664	3.01387	8.46035	7.67367	16.3999	23.1124	12.2571	6.07255	11.6258	11.8238	7.93806	5.77065	3.27576	6.13815	3.09106	2.38585	7.57819	3.43964	1.24987	0.895536	0.275909	0	0	0	0	0	0
1222	O=C(O)c1ccncc1	ISONICOTINIC-ACID	141.958	0	0	0	0	0	0	0.330278	1.34049	0.214669	1.43403	1.44631	0.691941	0.192977	0.294346	0.657044	1.13005	0.605761	2.59675	8.68867	8.53851	5.44537	7.29491	7.07935	10.8245	9.88073	16.1291	14.9155	6.32144	3.94496	6.16334	2.52181	4.09929	5.62145	2.9061	3.34344	7.42428	3.06506	1.11294	0.603291	1.15716	0.861771	0.451417	0.014037	0	0	0
1223	O=C(O)c1ccccn1	PICOLINIC-ACID	141.898	0	0	0	0	0	0	0.084001	1.21565	0.46684	0.83079	1.58318	1.14354	0.289505	0.231607	0.349526	1.04355	0.961153	4.16705	10.5475	9.05056	6.72234	5.98393	7.10762	9.97397	9.70332	12.6244	17.3541	6.63187	3.60983	3.89266	2.91315	1.77888	3.44459	5.5359	2.18515	7.85019	5.69219	2.00134	1.01262	0.305435	1.53176	0.412593	0	0	0	0
1224	O=C(O)c1cccnc1O	2-HYDROXYNICOTINIC-ACID	151.635	0	0	0	0	0	0	0	0.920296	1.74957	1.15934	2.50814	1.92012	1.22126	1.13863	0.592348	0.917651	2.02181	4.39471	8.21222	6.96426	4.88963	3.13795	6.53751	9.82382	13.9052	14.4986	11.5837	8.0975	6.14229	5.17493	6.51468	3.9777	3.58335	4.21631	3.50354	5.4392	6.37923	4.88107	1.55164	0	0	0	0	0	0	0
1225	Oc1ccc(I)cc1	4-IODOPHENOL	160.778	0	0	0	0	0	0	0.338598	1.24927	0.964679	0.74954	0.763162	1.40439	0.843526	0.742091	0.810075	0.681295	1.62684	3.85051	8.28555	9.9704	7.40853	3.596	5.29022	6.92948	7.46228	3.55257	9.69173	14.4895	21.0538	22.6011	19.3677	1.61363	2.03985	0.739166	2.25553	2.5393	0.944909	0	0	0	0	0	0	0	0	0
1226	COc1ccc([N+](=O)[O-])cn1	2-METHOXY-5-NITROPYRIDINE	168.828	0	0	0	0	0	0	0	0	0	0	0	0	0	0	0	0.00675	2.49045	6.2598	6.08092	11.12	9.09027	12.2639	15.4471	21.0737	15.6157	10.2238	4.59239	4.43022	5.28856	8.01532	4.68525	11.3496	8.91748	7.06653	3.55036	2.61067	3.848	0.666082	0	0	0	0	0	0	0	0
1227	Cc1ccnc(N)c1[N+](=O)[O-]	2-AMINO-4-METHYL-3-NITROPYRIDINE	171.017	0	0	0	0	0	0	0	0	0	0	0.295385	1.21463	0.802187	1.78358	1.99258	1.46009	1.59183	2.59196	6.07659	10.0792	9.95337	10.1668	8.08118	13.0195	17.2115	14.1719	10.747	9.73389	5.55806	4.17844	5.26881	7.96687	7.13316	5.14921	4.01001	2.80655	3.64485	2.45738	0.861688	0.811741	0.026641	0	0	0	0	0
1228	Cc1ccnc(N)c1	2-AMINO-4-METHYLPYRIDINE	142.298	0	0	0	0	0	0	0	0	0	0	0	0.168317	1.40882	1.9669	2.09785	3.38789	1.65735	2.94196	2.76242	4.61177	11.933	12.4813	10.5351	7.97219	8.48329	13.2748	7.70148	7.53313	7.98545	12.3577	9.4068	2.24742	2.49957	1.45612	2.91419	2.42523	1.63848	2.19151	1.59592	0.893965	0.800341	1.15695	0.334848	0	0	0
1229	Nc1ccc(S(N)(=O)=O)cc1	SULFANILAMIDE	186.822	0	0	0	0	0	0	0	0	0	0	0.354832	3.81169	6.11334	4.34542	5.57218	4.61586	3.43513	5.73087	9.12406	7.51099	6.94718	5.42238	6.44989	7.12402	4.84063	4.74607	10.086	8.16447	12.8878	16.9478	7.72533	3.33212	3.55507	7.30312	11.7022	10.2664	5.84288	1.6722	0.713639	0.065151	0	0	0	0	0	0
1230	O=C(O)c1cc([N+](=O)[O-])cc([N+](=O)[O-])c1O	3,5-DINITROSALICYLIC-ACID	215.76	0	0	0	0	0.071582	1.08651	0.752064	0.998685	1.87693	0.677853	0.153194	0.289468	1.18681	0.973974	0.292231	1.11267	2.52669	5.35782	6.17191	13.8582	17.8977	22.6282	12.8372	5.03004	4.83378	5.29204	8.14387	10.5239	7.1052	9.68376	18.4787	18.9818	12.2215	9.91155	6.52054	4.81927	0.528415	0	0	0	0	0	0	0	0	0
1231	COc1c(O)c(Cl)c(Cl)c(Cl)c1Cl	TETRACHLOROGUAIACOL	239.648	0	0	0	0	0	0	0	0	0.080684	0.373779	0.833976	0.889972	0.499259	0.49029	0.571861	0.450713	0.585912	0.619637	3.71783	9.58863	11.2779	13.9457	9.15184	14.7383	31.3033	18.1207	11.8165	29.2226	26.5231	20.9118	3.44263	3.71436	2.33179	3.59687	3.43191	0.193017	0	0	0	0	0	0	0	0	0	0
1232	O=Cc1cccc([N+](=O)[O-])c1	M-NITROBENZALDEHYDE	168.029	0	0	0	0	0	0	0	0	0	0	0	0	0	0	0	0.043317	2.65918	9.51057	13.3608	8.66052	8.68702	10.2831	11.1092	14.0785	17.5453	12.11	6.10664	2.29379	4.03588	4.26489	7.44562	9.94921	7.52163	4.59288	6.15125	7.46828	3.2345	1.03454	0.417252	0	0	0	0	0	0	0
1233	O=C(O)c1ccc(I)cc1	4-IODOBENZOIC-ACID	186.548	0	0	0	0	0	0	0.142037	1.27691	0.34754	0.956699	1.51537	1.09292	0.282029	0.212075	0.350381	1.0851	1.54728	6.06324	10.1347	8.26849	4.1597	4.72839	8.55808	11.1584	7.98927	12.2398	21.7431	24.5247	21.6593	11.926	3.98075	1.8493	2.9546	3.78718	0.948469	4.4428	5.13525	0.808618	0	0	0	0	0	0	0	0
1234	O=C(O)c1ccc(F)cc1	4-FLUOROBENZOIC-ACID	155.016	0	0	0	0	0	0	0	1.00179	0.764703	0.332281	1.71822	1.22665	0.500301	0.206732	0.326163	0.725865	2.06203	5.35438	7.94806	5.41093	6.05215	4.30765	5.42505	8.61296	12.4824	14.8577	17.1632	17.5649	8.89183	11.0845	6.55434	1.90886	2.72815	4.06538	1.20284	4.09946	5.53035	0.819796	0	0	0	0	0	0	0	0
1235	O=C(O)c1ccc(Cl)cc1	4-CHLOROBENZOIC-ACID	169.071	0	0	0	0	0	0	0.045381	1.09957	0.621535	0.56789	1.57427	1.28615	0.392247	0.197372	0.333328	0.857257	1.31122	4.78951	7.74845	6.21413	6.34209	5.90154	6.46132	8.88277	11.956	15.4803	20.3768	22.457	15.2349	8.29533	4.22178	1.76892	2.91147	3.9174	1.03287	4.65044	5.01815	0.717017	0	0	0	0	0	0	0	0
1236	COc1c(O)cc(Cl)c(Cl)c1Cl	3,4,5-TRICHLOROGUAIACOL	218.389	0	0	0	0	0	0	0	0	0	0.460643	0.346656	0.702217	1.05434	0.397501	0.577074	0.512589	1.98981	2.07967	3.42119	8.82586	10.5844	13.8773	10.4584	9.91855	16.8979	22.6273	18.8275	22.3554	23.2407	19.5609	6.01502	2.56545	1.96026	3.98067	3.17493	1.01465	0	0	0	0	0	0	0	0	0	0
1237	COc1cc(Cl)c(Cl)c(Cl)c1O	4,5,6-TRICHLOROGUAIACOL	217.042	0	0	0	0	0	0	0	0	0	0.59528	0.6404	0.616764	0.783057	0.117258	0.821072	1.12351	2.14531	2.12803	8.02431	10.3113	7.15223	14.2949	6.31502	7.37762	15.7234	21.5545	19.9948	22.0295	25.3102	23.8548	8.11922	2.78084	1.69547	1.76188	2.92252	1.20552	0	0	0	0	0	0	0	0	0	0
1238	O=C(O)c1ccc(Br)cc1	4-BROMOBENZOIC-ACID	175.381	0	0	0	0	0	0	0.084162	1.17704	0.505292	0.732554	1.52995	1.23419	0.350329	0.18925	0.339316	0.957079	1.42604	5.41498	8.33901	6.66997	7.89915	4.12538	5.54904	11.9008	10.7033	11.8062	19.0656	27.5128	14.5801	11.4069	4.0837	1.79134	2.77514	4.03838	0.875983	4.65132	5.03954	0.744881	0	0	0	0	0	0	0	0
1239	O=C(O)c1ccc(O)cc1	4-HYDROXYBENZOIC-ACID	157.292	0	0	0	0	0	0	0.382111	1.87157	2.05111	0.851518	2.63222	2.30017	1.74108	0.949519	1.20207	1.19589	2.35302	2.71185	5.652	7.74524	5.8868	4.44506	4.91113	6.29868	10.0272	8.67789	12.8582	15.5484	15.2969	8.80695	4.67413	5.66971	2.79622	5.05066	6.03885	2.85915	6.90128	2.30453	0.252402	0	0	0	0	0	0	0
1240	O=C(O)c1cccc(O)c1	3-HYDROXYBENZOIC-ACID	157.422	0	0	0	0	0	0	0.221768	2.09816	1.79783	1.05059	2.53392	2.68038	1.36916	0.784878	1.14695	1.43002	2.2515	1.7565	5.1425	7.9892	5.73711	5.55981	4.82293	8.54584	10.2255	6.72619	12.1663	15.9449	15.0084	9.12601	5.82684	4.36771	4.20388	5.65388	3.48899	6.38651	6.14478	0.835982	0	0	0	0	0	0	0	0
1241	COc1cc(Cl)c(Cl)cc1O	4,5-DICHLOROGUAIACOL	196.686	0	0	0	0	0	0	0	0	0	0.2317	0.526413	1.06935	0.488685	0.353214	0.429792	1.19022	2.29905	3.87404	7.08361	11.5664	8.26127	10.703	9.67859	5.42798	10.0361	14.9105	14.7087	24.5411	25.2005	20.3664	11.3604	2.47706	0.964471	2.55352	2.09778	1.98627	0.0055	0	0	0	0	0	0	0	0	0
1242	COc1cc(Cl)cc(Cl)c1O	4,6-DICHLOROGUAIACOL	196.513	0	0	0	0	0	0	0	0	0.018808	0.321804	0.599565	0.717111	0.626512	0.811767	0.493793	0.390103	1.5975	4.04748	5.79293	11.6483	10.0515	10.2019	10.292	9.5006	9.87039	15.674	19.2916	23.2805	25.6135	12.9175	5.73009	2.20415	1.87239	2.22243	3.12578	2.96952	3.16043	0.086146	0	0	0	0	0	0	0	0
1243	COC(=O)c1cccnc1	METHYLNICOTINATE	164.289	0	0	0	0	0	0	0	0	0	0	0	0	0	0	0	0	0	1.86323	9.78791	15.1786	11.4111	9.36514	14.0511	14.6114	13.5356	17.1212	14.743	6.8907	4.74666	5.44014	3.26978	3.00465	3.28085	3.74424	2.58783	5.30796	5.69642	1.48154	0.594888	1.17399	0.877165	0.463669	0.029947	0	0	0
1244	Nc1ccc(C(=O)O)cc1	4-AMINOBENZOIC-ACID	161.07	0	0	0	0	0	0	0	0.267221	1.14397	0.428365	0.929832	2.30006	4.40968	2.79692	2.73107	3.85462	2.94936	3.75418	5.07019	6.7664	7.55596	5.75288	5.14498	6.01921	5.89152	9.83344	8.54899	12.9231	13.8523	16.3493	7.28345	4.20965	3.00989	4.31428	4.22722	2.40147	5.33313	6.1354	0.705585	0	0	0	0	0	0	0
1245	Nc1ccc(C(=O)O)c(O)c1	4-AMINOSALICYLIC-ACID	168.736	0	0	0	0	0	0	0.088721	1.08523	0.61909	0.807156	1.37846	2.58638	3.61734	2.64935	3.10521	4.40883	2.77701	3.69407	5.00943	5.99117	5.22435	5.04339	5.38069	6.02983	8.08102	8.06902	11.5078	13.4967	14.7334	14.5222	10.1252	5.97965	4.79381	6.60135	4.06027	5.84873	3.90596	1.14283	0	0	0	0	0	0	0	0
1246	Cc1ccc(C(=O)O)c(O)n1	2-HYDROXY-6-METHYLNICOTINIC-ACID	170.357	0	0	0	0	0	0	0.768235	0.998265	0.291511	1.72231	1.40799	0.373164	0.173143	0.341639	1.21183	0.773291	0.484893	2.90546	4.4737	7.18636	8.39932	11.1944	12.2337	14.0045	17.4691	16.4925	12.4767	10.0243	5.52095	7.62027	3.13236	5.53522	4.60636	4.00813	5.28191	5.06121	4.6066	0.404554	1.22789	0.669163	1.10326	0.087243	0	0	0	0
1247	OCc1ccc(Cl)cc1	4-CHLOROBENZYL-ALCOHOL	165.689	0	0	0	0	0	0	0	0	0	0.553773	1.48517	1.12111	0.440491	1.00816	0.949562	0.750144	1.20724	1.33699	6.30834	9.87194	12.2802	11.7067	9.38837	8.20547	6.30226	9.49483	11.0211	11.1622	22.1898	20.5918	9.97597	1.90475	0.483263	0.910423	1.33664	1.38876	1.96935	1.4814	2.05903	0.851236	0.425326	0	0	0	0	0
1248	COc1cc(Cl)ccc1O	4-CHLOROGUAIACOL	175.292	0	0	0	0	0	0	0	0	0	0.109791	0.27645	1.12751	0.547152	0.445827	0.179039	0.942351	1.28022	2.51808	8.50328	13.5994	10.5939	9.60627	10.4106	6.80652	6.75359	9.53386	12.2934	13.3486	18.9469	22.3399	16.7483	2.02972	1.89482	0.920114	2.96427	2.31777	0.807468	0	0	0	0	0	0	0	0	0
1249	COc1ccc(Cl)cc1O	5-CHLOROGUAIACOL	175.273	0	0	0	0	0	0	0	0	0	0.144487	0.542483	0.742786	0.549296	0.71479	0.147635	0.752036	1.05224	2.8347	8.07979	13.3421	10.2542	9.64624	10.9665	7.14533	6.58033	9.17507	12.8421	13.0767	19.8589	22.0185	17.2127	1.99941	1.46812	1.45524	2.68085	2.36285	0.303959	0	0	0	0	0	0	0	0	0
1250	OCc1ccc(O)cc1	4-HYDROXYBENZYL-ALCOHOL	153.985	0	0	0	0	0	0	0	0.515485	1.44823	0.94948	1.7177	2.91295	1.35661	1.5682	1.801	1.6592	1.72456	2.43244	2.51921	6.95205	11.6727	12.3612	8.96311	7.09808	7.75726	7.15442	6.35385	8.10234	9.23326	11.8155	10.243	10.0345	3.55055	2.44173	2.27632	4.01778	3.90233	1.77319	2.31623	1.33576	0.630977	0	0	0	0	0
1251	Cn1cnc2c1c(=O)[nH]c(=O)n2C	THEOBROMINE	199.003	0	0	0	0	0	0	0	0	0.149708	0.685304	0.780102	0.94634	1.47797	0.494574	1.13015	3.25509	2.57204	5.62098	7.02115	12.2591	11.0583	15.714	21.2493	18.8952	16.6376	9.35788	4.97182	4.60072	2.06938	2.34461	3.15748	3.65632	4.65781	2.8234	4.13369	7.06937	4.96549	13.3053	5.43378	1.53025	0.000628	0	0	0	0	0
1252	OCc1cccc(CO)n1	2,6-PYRIDINEDIMETHANOL	169.452	0	0	0	0	0	0	0	0	0.365124	1.43436	3.58629	1.20913	1.00381	1.79305	2.25591	2.49135	2.13375	1.08122	2.59653	8.61953	15.1293	14.1408	9.40714	7.57898	8.6348	9.50377	9.35651	11.2009	14.8182	10.2861	4.88024	2.73598	3.4224	2.27048	4.59233	4.59715	4.92084	4.021	2.4142	1.36439	1.21666	0.298931	0.013505	0	0	0
1253	Cc1c(O)c(=O)ccn1C	1,2-DIMETHYL-3-HYDROXY-4-PYRIDONE	167.131	0	0	0	0	0	0	0	0	0	0	0	0	0	0	0	1.76097	3.68888	5.38091	11.7277	13.7775	11.5259	13.2128	14.1696	8.03634	9.82345	7.94807	9.96213	8.77555	8.16842	5.14343	3.57509	2.33413	3.59802	2.91139	2.05677	2.97873	4.05761	1.86602	2.57142	3.96123	2.78841	1.83798	0.426992	0	0	0
1254	Cc1cc(C)nc(N)c1	2-AMINO-4,6-DIMETHYLPYRIDINE	163.786	0	0	0	0	0	0	0	0	0	0	0	0.145404	0.960378	2.26205	2.2565	2.05427	2.92797	1.86753	3.39584	2.73678	9.55369	14.0805	16.6415	12.0883	11.2138	15.8307	14.1427	8.29141	8.26835	10.5181	10.7527	2.80784	2.03803	1.91493	2.45599	2.88453	1.79075	1.57818	2.19502	1.3409	0.681942	0.600059	0.104333	0	0	0
1255	CCNc1nc(Cl)nc(NCC)n1	SIMAZINE	234.019	0	0	0	0	0	0	0	0	0	0	0.309244	1.63207	1.2106	1.80046	1.57853	2.80008	0.445329	0.286179	1.38675	3.47094	11.6265	24.3805	24.5888	20.5747	23.8303	23.2133	19.8104	10.4416	12.7309	10.5215	8.01419	7.37591	5.11139	2.78092	5.26413	2.59315	3.14735	3.71457	1.84879	0.09964	0	0	0	0	0	0
1256	Cc1c(C(=O)O)cccc1[N+](=O)[O-]	2-METHYL-3-NITROBENZOIC-ACID	197.861	0	0	0	0	0	0	0.130709	1.16632	0.532764	0.936947	1.28984	1.1646	0.313838	0.226644	0.325666	1.08817	1.88789	5.48617	8.99776	7.9362	8.12142	12.2113	10.572	12.8858	18.7004	17.6577	13.503	6.64725	5.07383	6.4057	8.54492	10.777	9.53422	5.58145	4.71608	7.98652	2.60278	0.273056	0	0	0	0	0	0	0	0
1257	O=C(O)COc1ccccc1Cl	2-CHLOROPHENOXYACETIC-ACID	203.115	0	0	0	0	0	0	0.531652	1.28568	0.402298	1.21735	1.62645	0.482947	0.163357	0.292156	0.921405	2.50804	7.42219	6.47278	7.56456	10.4967	9.54397	8.20198	9.90953	8.91621	7.31011	8.40764	10.8744	16.8316	19.0981	19.3688	13.2219	3.78912	6.9012	2.9302	4.57451	5.94791	4.62159	0.732934	0	0	0	0	0	0	0	0
1258	COc1cc(C=O)cc(Cl)c1O	5-CHLOROVANILLIN	200.899	0	0	0	0	0	0	0	0	0.168813	0.443886	0.999585	0.433303	0.746109	0.780879	0.222055	0.230182	1.32316	3.1792	8.45363	16.4001	10.4532	11.9051	11.3255	13.4923	15.2807	15.1643	21.1657	19.7827	7.45698	2.42835	3.92735	2.77991	3.20933	5.03036	5.72311	6.55685	6.00869	2.54444	1.17065	0.41563	0	0	0	0	0	0
1259	Cc1cccc(C(=O)O)c1	M-TOLUIC_ACID	168.54	0	0	0	0	0	0	0	0.740245	1.02625	0.04527	1.8249	1.13661	0.683973	0.211543	0.320498	0.535802	1.03954	0.789324	2.3197	6.91688	12.4891	11.7778	10.8798	11.5992	14.9057	15.376	13.8476	12.5797	14.6983	10.4229	4.32674	3.12309	2.38767	3.92023	2.11017	3.13234	6.30924	1.17597	0.023737	0	0	0	0	0	0	0
1260	COc1ccc(C(=O)O)cc1	P-ANISIC-ACID	179.272	0	0	0	0	0	0	0	0.420085	1.30121	0.045205	1.35265	1.18294	0.994601	0.280388	0.277835	0.326229	1.11357	1.93395	7.72683	15.618	12.1827	8.81944	10.2397	9.3675	11.4014	9.63069	12.0199	15.7402	15.6468	9.68979	4.18979	5.96931	3.50406	4.5382	5.45213	1.45139	6.92222	2.42059	0.27514	0	0	0	0	0	0	0
1261	COC(=O)c1ccc(O)cc1	METHYL-P-HYDROXYBENZOATE	179.806	0	0	0	0	0	0	0.30295	1.37226	0.791077	0.805809	1.18755	1.15992	0.762782	0.62401	0.910255	0.821718	1.2774	1.58346	4.96869	11.8715	12.1211	10.055	10.3114	11.9877	12.0223	9.78083	12.1188	16.1685	15.703	11.5857	4.93992	4.93668	2.90852	2.81029	5.64972	3.4401	4.58669	3.94102	0.397684	0	0	0	0	0	0	0
1262	COc1cccc(C(=O)O)c1	M-ANISIC-ACID	179.449	0	0	0	0	0	0	0	0.89989	0.86661	0.151753	1.85257	1.16176	0.56516	0.204567	0.324558	0.657202	1.0625	1.55242	5.50093	14.3765	13.2943	9.64706	10.2693	12.0221	12.0683	7.69091	10.9692	17.1257	15.1784	9.732	5.21994	4.98222	4.21945	5.60732	3.39526	4.96696	5.86921	0.849481	0	0	0	0	0	0	0	0
1263	O=C1OC(=O)[C@H]2CC=CC[C@H]12	4-CYCLOHEXENE-1,2-DICARBOXYLIC-ANHYDRIDE	174.788	0	0	0	0	0	0	0	0	0	0	0	0	0	0	1.20191	3.15631	6.62937	3.37785	3.87803	13.3789	16.8554	12.438	11.6202	11.7435	7.69195	6.41698	5.77617	6.42295	4.25818	4.97907	7.01083	8.96096	8.11653	10.5192	9.59425	5.97306	1.06658	0	0	0	0	0	0	0	0	0
1264	O=C(O)COc1ccccc1	PHENOXYACETIC-ACID	179.798	0	0	0	0	0	0	0.38429	1.35486	0.308557	1.26385	1.56197	0.625774	0.195741	0.282393	0.809157	1.41443	5.07671	6.54973	6.08702	11.04	11.5631	10.5635	9.67681	8.45822	9.85883	6.6999	5.8413	12.0605	14.0716	12.6626	11.8178	8.315	6.99536	3.13116	4.21139	6.54834	3.21681	2.13261	0.764751	0.039113	0	0	0	0	0	0
1265	COc1ccccc1C(=O)O	O-ANISIC-ACID	178.487	0	0	0	0	0	0	0	0.124157	1.2186	0.345226	0.835077	1.32869	1.19941	0.364633	0.275972	0.292908	0.787304	1.70494	6.74175	16.1434	13.7881	10.5994	9.98816	10.6039	10.4958	10.0868	13.017	12.551	11.4265	12.7896	5.37767	4.51664	2.66338	3.22765	2.8133	1.10755	7.32729	3.59354	2.4463	0.622613	0	0	0	0	0	0
1266	COc1ccc(C(=O)O)cc1O	3-HYDROXY-4-METHYLOXYBENZOIC-ACID	189.347	0	0	0	0	0	0	0	0.473232	1.26512	0.173089	1.78515	2.30492	1.4466	0.806692	0.470028	1.36293	2.31406	2.56083	8.51529	13.9229	9.17208	9.56236	8.0244	8.54752	11.9964	11.7206	13.4497	14.3605	16.878	10.7704	5.32765	5.32236	3.60146	4.95808	6.04169	3.93806	7.35174	1.93261	0.219756	0	0	0	0	0	0	0
1267	CC(=O)c1ccc(N)cc1	4-AMINOACETOPHENONE	172.083	0	0	0	0	0	0	0	0	0	0	0	0.994838	3.38983	2.12125	2.69985	3.6061	1.97816	2.53528	5.40688	10.9826	11.2005	10.3541	10.0345	8.22467	9.84131	11.6522	8.8588	10.165	11.2383	16.0562	9.01551	1.44508	1.36916	1.64995	2.50011	3.27684	3.67007	5.71298	3.6655	1.17289	0.753643	0	0	0	0	0
1268	COC(=O)c1ccc(N)cc1	METHYL-P-AMINOBENZOATE	183.981	0	0	0	0	0	0	0	0	0	0	0	0.796674	3.27675	2.13658	2.65361	3.69016	2.19244	2.50543	4.69102	9.58302	13.4443	10.9335	11.5518	10.8588	10.2249	10.6283	8.89958	11.9439	14.0141	15.9683	11.2231	3.44006	3.43412	2.07905	2.97814	3.45607	3.3117	6.889	1.16816	0	0	0	0	0	0	0
1269	Cn1c(=O)c2c(ncn2C)n(C)c1=O	CAFFEINE	219.23	0	0	0	0	0	0	0	0	0	0	0	0	0	0	0.822473	2.87141	2.42583	3.40929	5.23186	13.0004	15.4879	18.9585	25.4652	25.1744	21.0407	12.9254	6.10677	4.69294	2.845	2.48637	2.93298	1.64373	3.72918	4.30466	3.90924	7.47354	4.27918	11.0703	6.3516	0.75091	0.024786	0	0	0	0	0
1270	CCC1(CC)C(=O)NC(=O)NC1=O	BARBITAL	220.855	0	0	0	0	0	0	0	0.317282	1.57163	1.87313	2.41828	3.1731	0.15077	0.733873	0.272785	3.10207	3.04125	0.740508	1.77807	1.30876	7.45406	22.7984	26.0826	16.2855	17.7166	18.9764	10.7637	1.69956	2.98973	4.9681	3.76403	2.75216	3.71685	5.26463	6.76437	14.288	11.3671	1.91358	0	0	0	0	0	0	0	0
1271	CC(=O)Oc1ccc(C)cc1	P-TOLYLACETIC-ACID	191.168	0	0	0	0	0	0	0	0	0	0	0	0	0	0	0	0	0	0.376908	6.09363	13.1219	16.0654	17.8094	17.5967	16.3556	14.7861	14.6158	11.5169	10.355	10.4043	9.97891	10.7272	5.3341	3.93413	3.39782	1.90189	4.5905	4.33357	1.60243	0.055874	0	0	0	0	0	0	0
1272	CCOC(=O)c1ccc(O)cc1	ETHYL-4-HYDROXYBENZOATE	201.541	0	0	0	0	0	0	0.325307	1.39438	0.762735	0.778417	1.16855	1.17699	0.748769	0.634091	0.909994	0.819171	1.30779	1.57217	4.02722	7.00493	12.9697	14.7202	15.952	12.4942	15.0517	16.3167	16.0558	16.3977	17.6499	11.2481	4.19717	4.88883	2.35488	2.81595	5.31057	3.99443	3.99892	4.70649	0.440623	0	0	0	0	0	0	0
1273	Cc1nnc(NS(=O)(=O)c2ccc(N)cc2)s1	SULFAMETHIZOLE	286.777	0	0	0	0	0	0	0.106148	0.537044	1.28902	0.584977	0.876396	2.7346	3.23569	2.97353	4.31799	3.6848	4.6735	4.78286	11.0138	13.3142	15.5231	11.8091	13.6587	17.5321	13.4515	15.7391	14.1173	14.5755	16.3251	13.0487	6.44482	7.63394	9.7974	16.0842	12.4247	6.5706	3.55822	2.43491	1.56234	1.31267	0.239907	0	0	0	0	0
1274	CN(C)C(=O)Nc1ccc(Cl)c(Cl)c1	DIURON	253.498	0	0	0	0	0	0	0	0	0	0.194281	1.07932	0.723116	0.856287	0.865557	1.29055	1.68984	2.54789	3.23769	7.1339	8.55436	14.1752	16.5963	17.6054	14.4877	15.3677	15.3544	18.9388	29.0372	28.7561	20.9744	8.31551	0.704574	0.82547	0.901459	2.09445	2.311	1.66154	2.20326	3.68155	1.81204	0	0	0	0	0	0
1275	CCOC(=O)c1ccc(N)cc1	ETHYL-P-AMINOBENZOATE	204.99	0	0	0	0	0	0	0	0	0	0	0	0.755306	3.30622	2.05051	2.79035	3.30038	2.32016	2.65102	4.04647	5.89328	12.531	15.7979	16.8588	12.8676	12.4185	14.7855	15.0342	12.809	14.3636	16.5316	10.2243	3.26432	2.63773	2.60675	2.7132	3.60487	2.82141	7.04899	1.73904	0.043041	0	0	0	0	0	0
1276	CCO[PH]([S])(OCC)Oc1nc(Cl)c(Cl)cc1Cl	CHLOROPYRIFOS	359.693	0	0	0	0	0	0	0	0	0	0	0	0	0	0.050678	1.10309	1.99926	0.49294	1.92651	1.49306	7.41166	20.6577	26.2041	25.8835	34.1776	35.6104	28.4163	17.2464	35.0775	27.225	18.0972	13.958	11.4202	9.21765	5.60937	0.737177	0	0	0	0	0	0	0	0	0	0	0
1277	CCNc1nc(Cl)nc(NC(C)(C)C#N)n1	CYANAZINE	282.547	0	0	0	0	0	0	0	0	0	0.175463	1.03083	1.40507	1.5693	2.40748	1.70074	0.999116	0.742734	0.882084	4.70744	10.5289	14.8823	21.812	21.1243	22.9334	34.0809	22.749	15.998	13.7655	14.1567	9.82642	10.816	9.11801	7.08747	7.38041	5.96326	5.16766	5.16564	1.72193	0.327721	0	0	0	0	0	0	0
1278	CCC1(CC)C(=O)NC(=O)N(C)C1=O	METHARBITAL	243.528	0	0	0	0	0	0	0	0.104549	0.71393	0.925597	0.997749	1.59966	0.213774	0.294125	0.216116	0.917252	1.98709	0.441938	1.75824	5.50675	11.2677	27.2146	32.1286	20.9104	19.3908	20.1185	12.8369	2.26456	2.32806	3.14232	3.78676	3.75638	3.76047	5.67006	6.22997	12.3162	10.4543	2.32816	0.014653	0	0	0	0	0	0	0
1279	Nc1ccc(S(=O)(=O)Nc2ncccn2)cc1	SULFADIAZINE	270.842	0	0	0	0	0	0	0	0	0	0.182275	0.568283	2.6434	3.60854	3.19891	3.63183	3.51392	3.72353	9.85584	15.972	12.8309	10.3443	7.36939	10.174	9.21307	12.5104	16.3068	20.071	14.9647	17.5887	18.9985	8.54033	5.71328	6.7767	9.53548	12.7734	9.28809	1.52645	1.63184	1.6496	0.323453	0	0	0	0	0	0
1280	Cc1cc(NS(=O)(=O)c2ccc(N)cc2)no1	SULFAMETHOXAZOLE	274.696	0	0	0	0	0	0	0	0	0.162545	0.891381	0.975424	3.26846	3.71531	2.93504	3.71876	4.95205	5.93912	5.64691	12.0284	14.1451	14.0293	10.5996	12.4067	15.1824	10.9111	9.09067	11.9865	13.8558	21.8171	15.3117	7.06578	7.60644	11.7775	13.7412	13.4516	9.45254	2.86567	1.37748	0.40302	0	0	0	0	0	0	0
1281	CCCOC(=O)c1ccc(O)cc1	PROPYL-4-HYDROXYBENZOATE	222.575	0	0	0	0	0	0	0.314866	1.36786	0.801563	0.806771	1.13584	1.17686	0.776272	0.612031	0.856485	0.749841	1.29946	1.52953	4.06541	7.16188	9.0331	15.272	19.4429	19.7731	18.5849	18.3463	19.4069	19.8054	17.0932	11.5345	4.29287	4.84827	2.26718	2.90222	5.32294	3.95418	3.92409	4.79569	0.436172	0	0	0	0	0	0	0
1282	CCOc1ccc(NC(C)=O)cc1	PHENACETIN	226.673	0	0	0	0	0	0	0	0	0.064913	0.605029	1.00291	0.94026	0.695222	1.5059	0.792787	0.842306	1.18581	1.41279	6.20706	11.4612	17.3303	20.0117	19.9341	15.5447	17.1681	15.4405	14.8876	9.33262	14.0117	14.5425	12.366	4.788	2.39232	3.84126	3.53653	3.40156	3.19001	3.73139	3.02732	1.75172	0.616729	0	0	0	0	0
1283	CCCOC(=O)c1ccc(N)cc1	PROPYL-P-AMINOBENZOATE	227.195	0	0	0	0	0	0	0	0	0	0	0	0.748229	3.28652	2.08801	2.79081	3.31053	2.2935	2.61831	4.01113	5.58355	9.25895	15.5053	20.9466	19.8429	16.3256	16.9762	17.9614	17.2135	14.4647	16.2036	10.2524	3.22786	2.59339	2.41589	2.95205	3.35351	2.97987	6.94051	1.77366	0.08136	0	0	0	0	0	0
1284	CN[C@@H](C)[C@H](O)c1ccccc1	EPHEDRINE	224.921	0	0	0	0	0	0	0	0	0	0	0	0	0	0.177254	1.09728	1.41769	1.02145	1.95542	1.95982	7.1966	14.2584	19.3296	21.9517	20.5778	17.7615	18.5075	14.827	12.6012	10.3223	10.6356	12.3081	8.26582	2.39616	2.03869	1.40506	2.42488	1.89424	1.49754	0.934588	1.49593	0.734725	0.18244	0	0	0	0
1285	CC[C@@H](C)C1(CC)C(=O)NC(=O)NC1=O	BUTABARBITAL	259.633	0	0	0	0	0	0	0	0.292591	1.40515	2.23755	2.44314	2.82865	0.359756	0.732261	0.341496	2.98092	3.15716	0.884499	1.80561	1.50304	5.79775	22.0086	27.1738	23.6769	21.7057	20.1263	18.2834	9.78528	3.03288	4.85056	3.84631	3.02964	3.53989	5.03541	6.61464	13.1498	11.4599	2.1556	0	0	0	0	0	0	0	0
1286	Nc1ccc(S(=O)(=O)Nc2ccccn2)cc1	SULFAPYRIDINE	276.155	0	0	0	0	0	0	0	0	0	0.563338	0.974154	2.84662	3.66231	3.01654	3.88165	4.16903	4.73864	6.0092	12.2735	15.9195	13.0569	10.8627	9.73571	9.46251	10.2032	9.53075	16.5262	16.7447	26.0201	23.0216	8.30442	6.88984	6.2859	9.00879	11.2363	10.0497	2.47313	0.905713	0.593823	0.066871	0	0	0	0	0	0
1287	Cc1cc(=O)n(-c2ccccc2)n1C	ANTIPYRINE	234.569	0	0	0	0	0	0	0	0	0	0	0	0	0	0	0	0	0.002143	1.36172	5.946	21.1018	23.6754	20.155	18.8618	14.6721	13.6954	11.1905	10.5479	16.3311	14.6092	14.9779	9.95628	4.94328	1.03894	1.42438	1.00237	1.52201	1.8904	1.86583	4.19801	5.26079	1.75426	0.544725	0	0	0	0
1288	Cc1ccnc(NS(=O)(=O)c2ccc(N)cc2)n1	SULFAMERAZINE	291.275	0	0	0	0	0	0	0	0	0	0.060619	0.568332	2.30832	3.97182	2.95178	3.8978	3.3574	3.60826	5.88821	12.0676	15.7258	14.3904	12.8466	12.5074	12.7441	16.3233	19.1969	19.6069	16.7078	18.1492	17.9584	9.34766	5.7543	6.80702	10.4141	12.2963	9.44116	2.73136	1.42773	1.12278	0.336397	0	0	0	0	0	0
1289	COc1cnc(NS(=O)(=O)c2ccc(N)cc2)nc1	SULFAMETER	303.289	0	0	0	0	0	0	0	0	0	0.033742	0.504665	2.32972	3.84042	3.04802	3.93574	3.03574	5.16349	8.91742	15.1282	17.1289	13.2112	12.965	14.0925	11.53	17.1806	15.565	15.5433	12.7329	20.0257	18.3884	11.6297	8.72828	7.67106	12.254	13.9692	9.70471	1.99509	1.92404	1.48853	0.060689	0	0	0	0	0	0
1290	COc1ccc(NS(=O)(=O)c2ccc(N)cc2)nn1	SULFAMETHOXYPYRIDAZINE	302.448	0	0	0	0	0	0	0	0	0.159464	0.739076	1.42574	2.74038	3.60544	3.65491	4.22763	5.77055	7.05865	8.48838	10.0181	12.8891	13.5214	13.123	14.8473	12.3566	17.538	17.6374	16.2536	11.7169	17.0768	17.0029	10.4688	8.28745	8.65438	12.5655	14.3316	11.6196	3.25441	1.98595	1.37054	0.61763	0.001058	0	0	0	0	0
1291	Cc1noc(NS(=O)(=O)c2ccc(N)cc2)c1C	SULFISOXAZOLE	302.495	0	0	0	0	0	0	0	0	0.114248	0.606262	1.14337	2.98765	3.30818	2.96448	4.16258	4.01146	3.27853	5.73607	9.31634	13.6274	18.2422	16.5113	15.2409	13.93	19.0699	14.3411	13.4573	14.0857	17.2158	14.2307	7.30714	8.88402	13.7951	15.1693	10.646	6.33571	1.73865	2.51051	2.1378	0.778191	0.077479	0	0	0	0	0
1292	CCCCOC(=O)c1ccc(O)cc1	BUTYL-4-HYDROXYBENZOATE	245.628	0	0	0	0	0	0	0.302242	1.36727	0.790984	0.801548	1.17315	1.17432	0.764936	0.621359	0.911445	0.823526	1.30283	1.57958	4.0188	6.55397	9.47346	11.7861	24.0573	24.3521	23.8813	20.0909	21.3279	24.5597	18.4529	11.3597	3.89381	5.06767	2.31188	2.98148	5.18449	4.10283	3.99398	4.47471	0.580508	0	0	0	0	0	0	0
1293	CCCCOC(=O)c1ccc(N)cc1	BUTYL-P-AMINOBENZOATE	248.862	0	0	0	0	0	0	0	0	0	0	0	0.746667	3.3137	2.05022	2.84665	3.2845	2.27471	2.63432	4.08651	5.32748	9.73109	12.553	24.565	24.047	21.9293	18.9108	19.5237	21.6642	15.311	16.6186	9.94869	3.28849	2.62329	2.50822	2.85382	3.43687	3.04083	6.88704	1.77785	0.072656	0	0	0	0	0	0
1294	CCC[C@@H](C)C1(CC)C(=O)NC(=S)NC1=O	THIOPENTAL	296.845	0	0	0	0	0	0	0	0.228362	1.12475	2.62095	2.59609	1.10429	0.296199	0.918918	2.61755	2.6573	1.07198	0.973197	1.19308	1.11543	7.01206	18.7473	29.7072	28.3358	28.0448	22.8795	23.4933	16.6547	8.7074	5.92004	9.13255	8.25158	5.213	8.18252	4.66557	8.11294	6.12804	1.0293	0	0	0	0	0	0	0	0
1295	CCC1(CCC(C)C)C(=O)NC(=O)NC1=O	AMOBARBITAL	287.527	0	0	0	0	0	0	0	0.281904	1.55703	1.72738	2.53646	3.27171	0.158322	0.719987	0.296696	2.92578	3.18612	0.754222	1.68677	1.36518	5.45415	21.1203	35.2554	27.9238	29.1601	22.2885	16.2789	14.8911	7.14615	4.70336	4.52387	2.1572	3.67961	5.94321	6.34089	14.0859	11.3088	2.04564	0	0	0	0	0	0	0	0
1296	CCC[C@@H](C)C1(CC)C(=O)NC(=O)NC1=O	PENTOBARBITAL	281.494	0	0	0	0	0	0	0	0.278193	1.3682	2.20433	2.4839	2.89489	0.33907	0.738112	0.330885	2.91799	3.23206	0.833738	1.81198	1.56334	4.8701	20.0098	31.5488	27.9542	26.5525	21.9948	21.3896	13.4563	3.8894	4.82942	3.83679	3.1403	3.49598	5.03772	6.63015	13.1398	11.4422	2.15814	0	0	0	0	0	0	0	0
1297	Oc1ccc(-c2ccccc2)cc1	P-HYDROXYBIPHENYL	214.501	0	0	0	0	0	0	0.037457	0.685643	1.37603	0.65808	0.703848	1.38672	0.886257	0.719385	0.75838	0.887306	0.834953	1.44545	3.62392	13.7137	18.4814	13.5007	11.5117	8.7562	11.0548	9.78279	10.0053	14.1224	18.6639	23.68	20.941	11.0183	3.01738	0.818399	2.17267	2.47206	1.49254	0	0	0	0	0	0	0	0	0
1298	CC(=O)c1c(O)ccc2ccccc12	1-ACETYL-2-NAPHTHOL	219.725	0	0	0	0	0	0	0	0	0	0	0	0	0	0	0	0	0.121836	3.48894	9.05628	15.6211	15.2938	13.956	11.4065	14.0591	12.6858	14.6412	17.277	21.2549	17.7669	12.3795	7.90201	3.034	3.49581	3.82052	3.85102	4.02595	2.46784	1.06909	0.131373	0	0	0	0	0	0	0
1299	CC(=O)c1ccc2ccccc2c1O	2-ACETYL-1-NAPHTHOL	220.339	0	0	0	0	0	0	0	0	0	0	0	0	0	0	0	0	0	0.716133	8.41948	17.5914	16.9459	14.5628	10.1916	14.1908	15.5936	14.7655	15.3084	18.9484	21.2315	17.3419	6.39982	1.84306	5.18117	3.60822	4.29372	2.18175	1.24273	1.41616	0.06397	0	0	0	0	0	0	0
1300	O=S(=O)(c1ccccc1)c1ccccc1	DIPHENYL-SULFONE	252.798	0	0	0	0	0	0	0	0	0	0	0	0	0	0	0	0	0	3.06209	19.7103	20.6003	17.5162	10.4127	16.5578	8.35211	9.14518	16.9219	12.7083	27.2974	27.8701	10.2911	2.75642	2.37665	2.15159	5.05982	8.6108	8.94086	4.23304	0	0	0	0	0	0	0	0	0
1301	CCC1(c2ccccc2)C(=O)NC(=O)NC1=O	PHENOBARBITAL	270.604	0	0	0	0	0	0	0	0.518959	1.7692	2.18456	2.62768	2.26498	0.41801	0.598549	0.53468	4.03705	2.10148	1.57445	5.72321	12.2731	19.6738	19.7896	17.6118	14.8485	12.3523	14.8248	10.9398	8.14323	12.4212	13.8278	11.3079	2.68284	5.63417	4.12835	8.96163	16.4036	8.97901	1.06639	0	0	0	0	0	0	0	0
1302	Cc1cc(NS(=O)(=O)c2ccc(N)cc2)nc(C)n1	SULFISOMIDINE	317.644	0	0	0	0	0	0	0	0	0.176595	0.851213	1.17118	2.79868	3.79325	3.01641	4.12044	4.37592	4.72892	5.55633	7.82889	12.0807	13.9946	16.9907	17.2275	15.6739	17.1004	24.5092	23.0636	16.2609	18.9639	16.3556	7.88175	6.6627	6.22731	10.1314	12.1292	10.0484	2.42927	2.29572	1.69692	0.498978	0.490805	0.688459	0.220936	0	0	0
1303	Cc1cc(C)nc(NS(=O)(=O)c2ccc(N)cc2)n1	SULFAMETHAZINE	317.677	0	0	0	0	0	0	0	0	0	0	0.458848	2.08318	4.10923	2.98387	4.05677	3.01585	3.40956	5.12138	8.56719	14.9048	16.7152	18.6122	14.5872	15.3054	21.3777	23.9613	21.5527	13.9406	19.6415	17.9728	8.34203	7.29723	6.85446	9.64032	11.4235	10.3125	2.80357	1.55636	1.04869	0.726368	0.103758	0	0	0	0	0
1304	CCCCCCc1ccc(O)cc1O	4-HEXYLRESORCINOL	262.586	0	0	0	0	0	0	0	0.440232	1.43294	0.993607	1.0129	2.03539	2.30386	1.25846	1.50495	1.6258	1.4833	2.13245	2.52089	4.94279	8.23829	8.67802	17.9347	29.1995	30.8383	25.8352	20.9184	19.6592	13.7224	12.5856	12.9817	9.37844	5.39426	3.29256	3.12689	4.95402	4.10622	0.165084	0	0	0	0	0	0	0	0
1305	C=CCC1([C@H](C)CCC)C(=O)NC(=S)NC1=O	THIAMYLAL	314.178	0	0	0	0	0	0	0	0.283406	1.13258	2.63807	2.65688	0.934797	0.28069	1.09923	2.48666	2.74134	0.996656	0.99415	1.92015	5.40512	12.0298	19.2884	24.6797	26.8364	28.5451	21.743	21.0067	18.7065	12.3724	9.05849	12.0513	8.44851	6.09148	9.09844	4.38184	8.14412	5.21951	0.855375	0	0	0	0	0	0	0	0
1306	CCCCNC(=O)NS(=O)(=O)c1ccc(C)cc1	TOLBUTAMIDE	321.359	0	0	0	0	0	0	0.041776	0.911356	2.1438	1.47569	1.61921	1.13245	1.05283	1.36895	1.60619	1.47821	0.738301	1.33828	6.72243	9.61887	16.5657	18.4805	29.1656	28.6714	29.4013	25.408	21.2061	22.4345	17.8436	9.91029	6.08148	5.35244	4.7665	11.2411	11.8329	6.90944	2.66067	3.05738	2.53688	0.82433	0	0	0	0	0	0
1307	O=c1c2ccccc2sc2ccccc12	THIOXANTHONE	238.421	0	0	0	0	0	0	0	0	0	0	0	0	0	0	0	0	1.58619	4.65567	12.2427	14.1212	13.7955	11.5221	10.8006	11.762	11.1633	20.8205	23.8304	27.3238	29.2119	13.1294	0.988169	0.343253	0.751633	1.20515	2.30727	3.30209	1.16007	5.29704	2.47265	0	0	0	0	0	0	0
1308	O=C(O)c1cccnc1Nc1cccc(C(F)(F)F)c1	NIFLUMIC-ACID	291.455	0	0	0	0	0	0	0.3244	1.20595	0.468579	1.13997	1.22962	0.887578	0.265461	0.275186	0.64386	1.01792	1.10583	2.97845	11.6876	13.218	9.91091	9.07653	10.9328	15.3802	16.8811	22.7651	27.8326	39.7968	44.838	20.0508	3.90177	4.34021	5.83467	2.45417	1.93954	1.91289	0.757435	0	0	0	0	0	0	0	0	0
1309	c1ccc2c(c1)Cc1ccccc1S2	THIOXANTHENE	237.222	0	0	0	0	0	0	0	0	0	0	0	0	0	0	0	0	0	0.138758	5.398	19.8286	20.6864	15.453	13.3021	13.5051	11.919	14.629	9.54031	18.0918	19.0253	24.924	21.7284	12.9006	1.59827	0.036852	0	0	0	0	0	0	0	0	0	0	0	0
1310	c1ccc2c(c1)Cc1ccccc1O2	XANTHENE	221.903	0	0	0	0	0	0	0	0	0	0	0	0	0	0	0	0	0	0.00275	2.43079	15.1982	20.5429	19.3002	16.5337	12.1028	11.5811	15.1466	10.7572	16.894	19.2351	19.1575	17.5132	13.5276	1.51372	1.70898	0.053372	0	0	0	0	0	0	0	0	0	0	0
1311	Cc1c(N(C)C)c(=O)n(-c2ccccc2)n1C	AMINOPYRINE	296.46	0	0	0	0	0	0	0	0	0	0	0	0	0	0	0	0	0	0.342784	2.85841	15.6748	21.2243	25.9575	27.3349	20.6068	22.907	26.0422	22.2743	19.6631	12.946	13.4524	12.2359	5.34549	2.10553	1.20329	1.23371	2.55346	2.45391	2.56312	2.77644	4.54646	0.27737	0	0	0	0	0
1312	O=C1c2ccccc2C(=O)c2ccccc21	ANTHRAQUINONE	238.906	0	0	0	0	0	0	0	0	0	0	0	0	0	0	0	0	0	2.15519	11.5612	17.192	15.7528	13.2688	14.0307	12.4776	16.1621	22.5408	30.1602	29.2145	6.22035	0.392469	1.7841	1.95573	3.45182	6.21191	4.34357	6.64176	9.16994	0.466834	0	0	0	0	0	0	0	0
1313	O=C(C(=O)c1ccccc1)c1ccccc1	DIPHENYLGLYOXAL	257.604	0	0	0	0	0	0	0	0	0	0	0	0	0	0	0	0	0	0.716908	13.9312	20.6481	19.785	12.7674	15.4388	10.8837	14.0169	20.3536	21.0047	28.0967	26.5306	8.42911	2.52291	2.08876	3.68973	5.27747	5.94223	8.38928	2.60001	0.69894	0	0	0	0	0	0	0	0
1314	Clc1ccc([C@H](c2ccccc2Cl)C(Cl)Cl)cc1	MITOTANE	335.822	0	0	0	0	0	0	0	0	0	0	0	0	0	0.21937	1.90058	1.24309	1.50917	4.55412	11.6505	15.452	14.6664	13.8725	18.003	11.4195	14.7954	21.4369	24.5295	30.5675	45.5526	38.3488	19.0671	1.60041	0	0	0	0	0	0	0	0	0	0	0	0	0	0
1315	CN(C)c1ccc(N=C2C=CC(=O)C=C2)cc1	N,N-DIMETHYLINDOANILINE	281.981	0	0	0	0	0	0	0	0	0	0	0	0	0	0	0	0	0.074832	3.29854	11.1301	24.3476	26.8846	18.351	17.4609	20.0211	12.8259	18.2141	20.9306	24.6139	19.048	15.8609	2.33941	2.5044	0.991781	1.3097	2.45976	2.87468	4.2344	4.2495	5.85799	2.7943	3.14953	1.05085	0	0	0	0
1316	CCN(CC)CC(=O)Nc1c(C)cccc1C	LIDOCAINE	323.495	0	0	0	0	0	0	0	0	0	0	0.24768	0.920149	1.15242	0.902536	0.75944	0.517742	1.43306	1.27737	2.43481	7.98767	15.7955	24.6127	27.3636	32.0134	32.7211	31.0505	31.2336	19.0759	11.1512	8.22451	9.75777	7.72383	2.50796	1.38886	1.95152	1.18116	2.42951	2.30533	3.86909	2.35697	1.73066	0.62352	1.02639	0.611912	0.258908	0
1317	CN1C(C(=O)Nc2ccccn2)=C(O)c2ccccc2S1(=O)=O	PIROXICAM	355.982	0	0	0	0	0	0.24566	0.701424	0.99964	0.771007	0.909599	0.706784	0.649311	0.730658	0.708002	0.852876	1.84211	2.98363	9.77557	18.2236	21.054	17.1889	19.2146	17.8722	15.5634	18.4303	21.2348	26.6784	22.3437	18.4139	7.85594	8.37074	6.32257	9.45785	15.3432	10.8114	4.59373	4.27342	3.97981	3.61192	2.78219	0.265717	0	0	0	0	0
1318	C[C@H](C(=O)O)c1ccc(-c2ccccc2)c(F)c1	FLURBIPROFEN	293.224	0	0	0	0	0	0	0.038851	1.11848	0.628803	0.707637	1.46602	1.35368	0.319677	0.153781	0.350755	0.98511	1.26722	2.46925	6.8331	13.9837	20.2207	19.6492	18.0052	14.1132	15.4687	16.9703	21.2576	22.3361	22.1066	26.6408	17.8367	6.1134	4.13781	3.7733	1.78289	5.2712	3.80651	0.661207	0	0	0	0	0	0	0	0
1319	Cc1cccc(Nc2ccccc2C(=O)O)c1C	MEFENAMIC-ACID	296.118	0	0	0	0	0	0	0	0.731275	0.909875	0.419593	1.66	0.757445	0.916437	0.164458	0.315938	0.747694	0.860841	0.717844	1.81504	9.43374	18.8369	22.3665	19.6625	19.6194	19.9092	22.1677	26.5863	21.5251	21.8104	18.6373	17.6602	10.0862	4.93771	3.0102	1.8432	2.1943	1.55255	0.492977	0	0	0	0	0	0	0	0
1320	CCOC(=O)C1(c2ccccc2)CCN(C)CC1	MEPERIDINE	325.19	0	0	0	0	0	0	0	0	0	0	0	0	0	0	0	0	0	0	0.319748	6.64939	17.9699	33.7424	31.395	33.2058	31.8951	28.7358	23.6345	13.2723	11.9156	12.515	10.5728	7.39239	2.27184	1.35502	3.00873	3.40053	4.95559	3.48776	0.881716	0.156936	0.609009	0.399892	0.432034	0.035689	0	0
1321	Cc1nnc2n1-c1ccc(Cl)cc1C(c1ccccc1Cl)=NC2	TRIAZOLAM	375.95	0	0	0	0	0	0	0	0	0	0	0	0	0	0	0	1.17196	4.45407	8.25593	17.3149	22.4591	18.3704	17.602	20.0299	20.7624	23.8046	22.6639	28.2206	25.0375	30.6696	16.9689	2.63306	4.05733	2.28934	4.02355	3.67445	3.23266	2.75391	5.55535	4.66006	3.50911	2.71767	1.5508	0	0	0	0
1322	CN1CC[C@]23c4c5ccc(O)c4O[C@H]2[C@@H](O)C=C[C@H]3[C@H]1C5	MORPHINE	326.631	0	0	0	0	0	0	0	0	0.587986	0.623639	0.484558	0.556333	0.722838	1.2649	1.57368	1.41492	1.51239	0.906229	4.69594	9.61712	18.5972	30.7206	24.6453	23.4986	22.2977	22.6883	16.1128	10.7654	10.613	10.5575	9.8831	9.85762	8.55801	4.94962	5.27027	4.20216	3.20151	2.82995	3.34978	1.41633	0.68654	0.329881	0	0	0	0
1323	CN1CC[C@]23c4c5ccc(O)c4O[C@H]2C(=O)CC[C@H]3[C@H]1C5	HYDROMORPHINONE	327.283	0	0	0	0	0	0	0	0	0.390642	0.777589	0.334793	0.881835	0.677061	0.343062	0.604182	1.00829	3.2458	2.92308	5.42846	7.06571	15.9393	32.0032	30.0131	26.0494	24.5203	20.977	14.2471	9.06737	9.1788	9.12769	9.92193	7.63054	6.647	4.32663	7.19036	7.42669	6.28232	3.02856	2.39838	0.596284	0.507691	0.312421	0	0	0	0
1324	COc1ccc2c3c1O[C@H]1[C@@H](O)C=C[C@H]4[C@@H](C2)N(C)CC[C@]314	CODEINE	348.588	0	0	0	0	0	0	0	0	0	0	0	0	0	0	0.005122	0.548728	0.594653	0.368573	4.51135	13.6337	26.3356	35.2725	30.5981	27.3761	22.4389	23.4199	16.119	10.5748	11.3029	11.6699	7.86112	10.1485	8.61662	5.84233	5.51723	4.68593	2.50136	2.49418	3.44325	1.75098	0.698714	0.38607	0	0	0	0
1325	C[C@]12CC[C@@H]3c4ccc(O)cc4CC[C@H]3[C@@H]1CCC2=O	ESTRONE	340.891	0	0	0	0	0	0	0	0.164102	0.880771	1.1238	0.628967	0.860026	1.4099	0.745671	0.675633	0.691626	0.87268	0.859733	1.46513	4.37044	12.6529	26.7874	38.712	37.367	31.9351	26.2956	18.6499	9.25193	9.44138	10.3689	11.6885	8.58723	5.04585	4.33015	1.73345	4.752	7.77219	4.55098	2.78935	0.876699	0.113724	0	0	0	0	0
1326	C[C@]12CC[C@@H]3c4ccc(O)cc4CC[C@H]3[C@@H]1CC[C@@H]2O	ESTRADIOL	343.674	0	0	0	0	0	0	0	0.299641	1.27777	0.953713	1.11573	2.498	2.22744	0.657184	1.47843	2.28239	1.54056	2.08073	2.23983	3.65659	5.71103	12.1107	33.4555	39.6507	34.5344	27.9233	22.3454	19.1513	14.2346	9.93611	11.6934	9.76325	6.76553	3.5059	2.34873	3.50215	4.16798	2.7318	1.89743	1.49248	0.566344	0	0	0	0	0
1327	C[C@]12CC[C@@H]3c4ccc(O)cc4CC[C@H]3[C@@H]1C[C@@H](O)[C@@H]2O	ESTRIOL	355.427	0	0	0	0	0	0	0	0.270948	1.24134	1.20037	2.24082	3.44837	1.98444	1.87496	2.19802	2.76356	2.46062	3.26397	2.37891	4.66705	7.32982	20.1368	33.7323	34.7132	28.4097	24.6738	21.1444	15.2495	12.2612	10.6016	12.2492	10.8636	6.77837	5.61526	3.51614	5.68623	4.99475	3.9447	3.5111	2.48391	0.694892	0	0	0	0	0
1328	C[C@]12CC[C@@H]3[C@H]4CCC(=O)C=C4CC[C@H]3[C@@H]1CC[C@@H]2O	NANDROLONE	351.457	0	0	0	0	0	0	0	0	0	0.250147	0.507067	1.54732	0.796631	0	0.911757	1.43564	0.827744	0.909242	0.541305	2.04767	9.99383	23.7282	48.3734	44.3081	38.2156	26.509	20.3171	18.3807	10.7192	3.93644	3.23209	1.45582	1.32242	1.64236	2.34709	3.72576	3.41103	8.47073	5.03042	3.64608	2.66954	0.345716	0	0	0	0
1329	C[C@]12CC[C@H]3[C@@H](CCC4=CC(=O)CC[C@@]43C)[C@@H]1CC[C@@H]2O	TESTOSTERONE	372.211	0	0	0	0	0	0	0	0	0	0.248976	0.508849	1.5309	0.81245	0	0.940526	1.37896	0.810981	0.91918	0.540473	2.2563	10.9867	23.4747	46.0007	45.2904	40.0524	27.3729	25.1414	19.0667	8.91284	4.28861	3.1651	1.58676	1.12204	1.51232	2.92219	3.06639	4.04895	8.26966	4.96629	3.71392	2.63554	0.218579	0	0	0	0
1330	C[C@]12CC[C@H]3[C@@H](CC[C@H]4CC(=O)CC[C@@]43C)[C@@H]1CC[C@@H]2O	ANDROSTANOLONE	377.118	0	0	0	0	0	0	0	0	0	0.22076	0.475304	1.47772	0.927382	0	0.783368	1.53181	0.753632	0.895563	2.03134	4.93647	4.98198	16.2727	42.5727	48.9176	46.2379	32.6355	24.8302	22.5053	8.4795	3.35331	1.60949	1.73763	1.82265	2.06465	3.35461	3.3226	6.90263	5.67426	3.90492	3.8857	0.908137	0	0	0	0	0
1331	C#C[C@]1(O)CC[C@H]2[C@@H]3CCc4cc(O)ccc4[C@H]3CC[C@@]21C	ETHINYL-ESTRADIOL	374.752	0	0	0	0	0	0	0	0.276122	1.24856	0.929832	1.73675	1.92037	1.4988	1.70592	2.82158	4.49295	2.13667	2.1642	2.72929	4.92212	6.78019	17.1732	29.9495	34.859	32.2762	27.3198	28.0931	18.1417	14.474	15.7649	16.6694	13.0904	9.00201	4.24713	2.46137	4.39726	4.66408	2.19964	0.63764	0.210504	0	0	0	0	0	0
1332	C#C[C@]1(O)CC[C@H]2[C@@H]3CCC4=CC(=O)CC[C@@H]4[C@H]3CC[C@@]21C	NORETHINDRONE	383.508	0	0	0	0	0	0	0	0	0	0.092275	1.09521	0.869834	0.206077	1.10755	2.32764	3.48166	1.26573	1.18157	1.03844	3.33176	10.931	31.6259	41.3685	40.6046	34.59	28.0895	25.9467	17.5287	11.3891	9.72871	8.14302	5.00276	3.28159	2.37995	2.41904	4.97452	3.68646	7.87937	3.7333	2.56149	2.0302	0.273687	0	0	0	0
1333	C[C@]12C=CC(=O)C=C1CC[C@@H]1[C@@H]2CC[C@@]2(C)[C@H]1CC[C@]2(C)O	METHANEDIENONE	386.187	0	0	0	0	0	0	0	0	0	0	0.362288	0.878079	1.19499	0.426417	0.24374	1.24237	0.99496	0.929084	2.90941	7.20004	16.0573	24.2905	37.395	39.1405	38.7507	30.0589	29.4547	21.9126	13.2968	6.12048	1.55471	1.51344	0.7571	1.18962	2.43204	3.63684	3.22711	6.59046	6.33174	3.3942	3.66561	0.62981	0	0	0	0
1334	CC(=O)O[C@H]1CC[C@H]2[C@@H]3CCC4=CC(=O)CC[C@@H]4[C@H]3CC[C@]12C	NANDROLONE-ACETATE	403.562	0	0	0	0	0	0	0	0	0	0	0	0	0	0	0	0	0	0	1.24168	6.45341	16.0404	37.4507	51.2091	49.8068	43.3718	30.7842	23.5706	18.6765	7.43588	4.19111	3.46812	2.47324	1.98657	3.38106	3.70803	5.13432	7.43407	8.77687	4.30157	2.31524	2.0306	0.307071	0	0	0	0
1335	C[C@]1(O)CC[C@H]2[C@@H]3CCC4=CC(=O)CC[C@]4(C)[C@H]3CC[C@@]21C	METHYLTESTOSTERONE	391.763	0	0	0	0	0	0	0	0	0	0.003928	0.427882	0.823455	1.19119	0.443327	0.175347	1.13924	1.05558	0.630641	1.03049	2.67428	12.3775	25.6462	42.1112	46.3837	42.61	29.8068	30.2055	19.9041	9.86262	4.47187	3.23922	1.14234	0.880503	1.17525	2.69239	4.08433	3.4346	7.71692	4.98066	3.35044	2.91438	0.321203	0	0	0	0
1336	C[C@]12CCC(=O)C[C@@H]1CC[C@@H]1[C@@H]2CC[C@@]2(C)[C@H]1CC[C@]2(C)O	MESTANOLONE	397.085	0	0	0	0	0	0	0	0	0	0	0.310425	0.747227	1.27618	0.497977	0.249233	1.05588	1.12644	0.598826	2.42829	5.36362	6.26582	18.5757	38.7683	50.3833	48.3624	35.4152	29.1887	24.0789	9.23257	3.86614	1.73444	1.139	1.57849	1.71188	3.00365	4.71267	5.93565	5.26169	3.94864	3.418	1.22607	0.07822	0	0	0	0
1337	C#C[C@]1(O)CC[C@H]2[C@@H]3CCC4=CC(=O)CC[C@@]4(C)[C@H]3CC[C@@]21C	ETHISTERONE	405.331	0	0	0	0	0	0	0	0	0	0.103201	0.918426	1.03369	0.269008	1.08223	2.39505	3.13464	1.48565	1.38195	1.05826	4.52309	11.734	29.7246	41.6924	40.2667	36.1107	29.8694	30.1013	18.5323	10.9575	8.89839	8.7806	5.2138	3.09549	2.47572	2.30872	4.59412	3.76673	7.52334	4.38764	2.323	2.25905	0.274032	0	0	0	0
1338	CC(=O)[C@H]1CC[C@H]2[C@@H]3CCC4=CC(=O)CC[C@]4(C)[C@H]3CC[C@]12C	PROGESTERONE	408.623	0	0	0	0	0	0	0	0	0	0	0	0	0	0	0	0	0	0	0.607869	5.72339	18.5261	35.5629	49.491	45.3282	43.4588	32.1539	23.0326	16.5485	8.76137	4.08155	2.43022	0.805918	1.05784	2.72662	2.58302	5.07747	6.59124	9.68287	4.88939	3.31943	2.05142	0.290049	0	0	0	0
1339	C[C@]12CC[C@H]3[C@@H](CCC4=CC(=O)CC[C@@]43C)[C@@H]1CC[C@@H]2C(=O)CO	DESOXYCORTICOSTERONE	417.34	0	0	0	0	0	0	0	0	0	0	0	0	0	0	0	0.550015	0.902425	0.499142	3.86377	9.87783	20.2492	39.7859	47.5234	42.707	36.4451	27.708	22.7347	15.7784	9.22253	5.4421	2.44498	2.45822	3.35389	4.15293	5.23962	6.35853	5.37933	9.51203	4.8301	4.03191	2.05341	0.275665	0	0	0	0
1340	CC(=O)O[C@H]1CC[C@H]2[C@@H]3CCC4=CC(=O)CC[C@]4(C)[C@H]3CC[C@]12C	TESTOSTERONE-ACETATE	422.474	0	0	0	0	0	0	0	0	0	0	0	0	0	0	0	0	0	0	1.21607	7.32983	17.4963	35.5048	49.9647	50.0293	45.5246	32.5528	26.6992	19.8736	7.97489	3.30793	3.89965	2.3592	1.86345	3.43152	3.71787	5.00762	7.52969	8.66613	4.32851	2.31586	2.01036	0.315979	0	0	0	0
1341	CCC(=O)O[C@H]1CC[C@H]2[C@@H]3CCC4=CC(=O)CC[C@@H]4[C@H]3CC[C@]12C	NANDROLONE-PROPIONATE	424.392	0	0	0	0	0	0	0	0	0	0	0	0	0	0	0	0	0	0	0.168013	4.76453	14.3807	38.8256	56.6376	53.1998	44.2238	32.4927	30.3646	21.5026	8.72657	4.05319	3.54918	2.72877	1.82402	3.73621	3.1932	5.01628	7.09734	8.8899	3.70727	2.32318	2.01945	0.301884	0	0	0	0
1342	C#C[C@]1(OC(C)=O)CC[C@H]2[C@@H]3CCC4=CC(=O)CC[C@@H]4[C@H]3CC[C@@]21C	NORETHINDRONE-ACETATE	433.371	0	0	0	0	0	0	0	0	0	0	0	0	0.034698	0.573762	1.65543	1.99744	0.704468	0.840352	2.14878	8.39359	19.3053	38.882	46.0782	46.6448	39.3151	32.4533	24.7516	14.5397	10.795	9.69693	7.81234	7.10187	3.19279	2.59857	4.45843	4.97558	7.121	8.72183	3.89982	2.37905	2.03484	0.272443	0	0	0	0
1343	CCC(=O)O[C@H]1CC[C@H]2[C@@H]3CCC4=CC(=O)CC[C@]4(C)[C@H]3CC[C@]12C	TESTOSTERONE-PROPIONATE	444.177	0	0	0	0	0	0	0	0	0	0	0	0	0	0	0	0	0	0	0.171393	5.5986	15.9633	36.6844	55.1723	53.7337	46.3883	35.5488	33.6291	21.9516	8.57426	3.56487	4.09972	2.01626	2.09024	3.79248	3.61315	4.80199	6.91357	9.04778	3.60723	2.44155	1.96957	0.261702	0	0	0	0
1344	CC/C=C(\C)C1(CC)C(=O)NC(=O)NC1=O	VINBARBITAL	276.391	0	0	0	0	0	0	0	0.28691	1.65642	1.88076	2.4374	2.82969	0.303846	0.573305	0.505642	2.64676	3.27782	0.850666	1.54355	4.81543	8.28386	17.9427	26.8501	25.7211	22.764	25.2982	21.1051	15.1005	7.96635	5.20493	4.04068	3.18044	4.86203	4.18653	6.58858	13.386	9.80674	1.76373	0	0	0	0	0	0	0	0
1345	COC(=O)c1ccc(N(C)C)cc1	METHYL-4-DIMETHYLAMINOBENZOATE	226.626	0	0	0	0	0	0	0	0	0	0	0	0	0	0	0	0	0	0.85065	4.52738	10.7341	24.1038	23.5217	18.7847	21.3185	18.2578	12.3657	11.8425	9.40526	14.6149	12.4147	14.1158	6.15757	2.59852	1.97919	1.25048	3.60039	1.51069	6.46216	1.86382	0.127704	0	0	0	0	0	0
1346	COc1ccc(NC(C)=O)cc1	METHACETIN	205.37	0	0	0	0	0	0	0	0	0.040084	0.596518	1.03994	0.903691	0.76424	1.51041	0.791759	0.947933	1.17005	1.41983	7.09963	15.107	17.7681	15.0247	15.4155	12.9044	14.0654	10.5002	9.80442	9.24669	14.0624	14.77	11.6264	4.83273	2.82162	3.09518	3.75072	3.67302	3.02126	3.6067	2.95258	1.7418	0.649642	0	0	0	0	0
1347	CCn1cc(C(=O)O)c(=O)c2ccc(C)nc21	NALIDIXIC-ACID	270.375	0	0	0	0	0	0	0	0.36139	1.24645	0.204861	1.40606	1.14882	0.879094	0.273167	0.318545	1.18172	2.51609	4.20328	5.89666	10.3043	16.0652	19.2714	22.4765	22.7518	27.8666	27.3401	19.1369	11.1058	5.2576	4.47589	3.26097	4.09253	4.10554	1.69196	4.66917	4.29155	8.79066	4.0415	6.42996	3.29131	1.87482	0.415629	0	0	0	0
1348	COP(C)(=O)OC	METHYL-PHOSPHONICACIDDIMETHYLESTER	147.444	0	0	0	0	0	0	0	0	0	0	0	0	0	0	0	0	0.102096	3.16758	6.66112	13.9374	14.6331	13.777	16.8332	17.3989	10.9993	6.31928	6.07938	3.25085	3.27579	2.23544	3.38576	3.55079	3.96658	4.06697	3.91406	4.60142	1.15869	0.373267	4.26904	4.93912	1.79425	0.008943	0	0	0	0
1349	C/C=N/O	ACETALDOXIME	80.8993	0	0	0	0	0	0	0	0.164343	0.599704	1.70886	0.49139	0.799142	0.817932	1.03272	0.797608	0.428657	0.704263	0.951822	3.04121	7.31143	7.10487	7.8825	6.84054	5.64703	7.84386	6.31187	4.43291	1.81884	2.73663	1.64159	2.1467	2.30221	2.8721	5.55565	4.21493	3.59935	3.53175	2.12834	1.40267	0.697656	0.019637	0	0	0	0	0
1350	Nc1ccc([N][N]c2ccccc2)cc1	P-AMINOAZOBENZENE	250.289	0	0	0	0	0	0	0	0	0	0	0	0.004472	1.027	3.25633	2.05345	2.6122	3.10781	2.89898	9.05412	18.0772	18.2112	16.6737	12.624	11.7665	11.8323	11.0784	9.98292	18.1219	17.3278	23.3367	24.0518	10.2564	2.4729	4.56566	1.93751	3.01402	2.97248	1.21655	0.874853	0.979272	0.288876	0	0	0	0	0
1351	Cc1ccc([N+](=O)[O-])c([N+](=O)[O-])c1	3,4-DINITROTOLUENE	195.993	0	0	0	0	0	0	0	0	0	0	0	0	0	0	0	2.4344	6.3214	6.49098	9.68691	9.3536	11.1138	8.22095	11.2071	14.9916	16.7874	12.0884	9.94566	4.96581	5.56357	11.3391	18.0014	14.0332	6.40882	6.10128	4.96133	3.05295	0.099636	0	0	0	0	0	0	0	0	0
1352	C=C1CC(=O)O1	DIKETENE	100.985	0	0	0	0	0	0	0	0	0	0	0	0	0	0	0	2.36497	5.86259	6.60378	7.11388	8.02962	4.99289	7.87994	4.6296	4.07868	5.54074	4.20005	4.4209	4.17751	6.1519	6.43631	5.62223	7.02811	4.17354	7.20346	5.84232	3.54515	0.749937	0	0	0	0	0	0	0	0	0
1353	C=Cc1ccccc1C	O-METHYLSTYRENE	168.787	0	0	0	0	0	0	0	0	0	0	0	0	0	0	0	0	0	0.493984	3.33674	11.7311	18.0685	15.3646	12.6718	9.46528	10.0999	11.568	13.9202	8.55899	10.8344	7.927	14.2635	12.1035	7.90277	2.36206	0	0	0	0	0	0	0	0	0	0	0	0
1354	C=Cc1cccc(C)c1	M-METHYLSTYRENE	169.385	0	0	0	0	0	0	0	0	0	0	0	0	0	0	0	0	0	0.236504	3.83182	11.9923	16.5988	14.8008	14.1821	9.53686	11.2795	13.2097	12.8556	10.6088	8.95548	8.14347	16.3298	11.83	7.11806	2.05022	0	0	0	0	0	0	0	0	0	0	0	0
1355	CC(C)[C@@H](C)C(C)(C)C	2,2,3,4-TETRAMETHYLPENTANE	208.099	0	0	0	0	0	0	0	0	0	0	0	0	0	0	0	0	0	0	0	0	0	3.31391	21.0112	28.1746	36.9619	23.1555	21.0605	23.829	26.1114	4.29027	0	0	0	0	0	0	0	0	0	0	0	0	0	0	0	0
1356	CC(C)C(C)(C)C(C)C	2,3,3,4-TETRAMETHYLPENTANE	207.603	0	0	0	0	0	0	0	0	0	0	0	0	0	0	0	0	0	0	0	0	0.105216	2.69259	20.7103	29.2593	37.0156	21.7862	20.8874	23.356	25.5867	4.72398	0	0	0	0	0	0	0	0	0	0	0	0	0	0	0	0
1357	CCC(C)(C)C(C)(C)C	2,2,3,3-TETRAMETHYLPENTANE	205.628	0	0	0	0	0	0	0	0	0	0	0	0	0	0	0	0	0	0	0	0	0	2.21224	23.6185	25.813	33.3407	21.8943	24.747	25.8886	25.0264	2.16983	0	0	0	0	0	0	0	0	0	0	0	0	0	0	0	0
1358	CC(C)(C)CC(C)(C)C	2,2,4,4-TETRAMETHYLPENTANE	210.994	0	0	0	0	0	0	0	0	0	0	0	0	0	0	0	0	0	0	0	0	0	2.58304	21.9737	33.5602	37.5415	18.8172	17.7565	21.0938	31.1918	5.37781	0	0	0	0	0	0	0	0	0	0	0	0	0	0	0	0
1359	CC(=O)Nc1ccc(O)cc1	ACETAMINOPHEN	183.802	0	0	0	0	0	0	0	0.542832	1.42465	1.16758	1.87044	2.18514	1.60868	2.64016	1.01683	2.07688	1.96979	2.72717	7.71715	10.2065	10.4901	9.47812	10.3243	8.24482	11.9509	10.0392	8.02839	10.336	14.1466	14.23	11.7029	5.0247	1.97032	2.52809	4.27576	3.99503	4.74429	3.64311	2.96091	1.56729	0.846105	0	0	0	0	0
1360	FC(F)(F)CCl	2-CHLORO-1,1,1-TRIFLUOROETHANE	106.194	0	0	0	0	0	0	0	0	0	0	0	0	0	0.790246	4.95789	3.08459	3.50775	2.80321	2.17353	1.31465	1.57384	2.39394	4.33341	3.56387	3.48346	4.99948	10.5617	23.6155	28.5094	9.42532	6.662	0	0	0	0	0	0	0	0	0	0	0	0	0	0	0
1361	Cc1cc([N+](=O)[O-])cc([N+](=O)[O-])c1	3,5-DINITROTOLUENE	193.825	0	0	0	0	0	0	0	0	0	0	0	0	0	0	0	0.298066	2.26239	5.67243	9.23533	10.1788	14.0097	15.8349	15.5414	22.9363	16.6401	5.95247	4.61478	5.00968	6.85465	5.48738	16.168	13.4617	8.53906	4.70556	4.77403	5.99623	1.56858	0	0	0	0	0	0	0	0	0
1362	Cc1cc([N+](=O)[O-])ccc1[N+](=O)[O-]	2,5-DINITROTOLUENE	193.683	0	0	0	0	0	0	0	0	0	0	0	0	0	0	0	0.158016	4.26146	6.5476	9.39182	9.3447	10.9147	13.4487	13.9066	22.4545	18.8234	6.1368	6.24045	3.37264	5.76892	7.74546	14.7511	15.0819	7.76369	5.25143	5.43813	5.06381	0.549498	0	0	0	0	0	0	0	0	0
1363	C=CCCCCCCCCCCCCCCC	1-HEPTADECENE	383.142	0	0	0	0	0	0	0	0	0	0	0	0	0	0	0	0	0	0	0	0.109446	2.81793	6.04369	22.1192	59.4545	80.9418	67.4323	53.7028	33.9598	28.628	4.13132	3.29564	3.37466	3.14925	1.75949	0.102238	0	0	0	0	0	0	0	0	0	0	0
1364	C=CCCCCCCCCCCCCCCCCC	1-NONADECENE	427.751	0	0	0	0	0	0	0	0	0	0	0	0	0	0	0	0	0	0	0	0.701414	4.253	7.71667	27.2328	68.2384	86.6425	68.2387	60.3775	34.8126	35.2231	6.25103	2.34806	2.87183	3.39592	2.04425	2.1993	0.115218	0	0	0	0	0	0	0	0	0	0
1365	C#CCCl	PROPARGYL_CHLORIDE	93.4702	0	0	0	0	0	0	0	0	0	0	0	0.168071	0.58421	2.48054	1.9383	4.07976	5.94196	2.83514	4.23642	3.02337	2.57146	4.16758	2.93066	3.95727	2.46558	6.29941	8.20538	3.83597	2.81808	14.0818	11.8447	18.4998	3.28067	0	0	0	0	0	0	0	0	0	0	0	0	0
1366	FC(F)C(F)(Cl)Cl	2,2-DICHLORO-1,1,2-TRIFLUOROETHANE	129.336	0	0	0	0	0	0	0	0	0	0	0	0	1.21019	2.97479	1.81798	1.19441	0.845791	0.627129	1.95007	4.43694	2.82881	1.70658	8.25104	6.27546	1.44661	9.01444	21.7511	35.721	26.796	5.77162	0	0	0	0	0	0	0	0	0	0	0	0	0	0	0	0
1367	C/C=C\C=C\C	CIS,TRANS-2,4-HEXADIENE	133.549	0	0	0	0	0	0	0	0	0	0	0	0	0	0	0	0	0	0	0.139119	1.75817	10.7265	15.3271	20.6328	12.6137	13.3499	12.7399	16.8538	8.92026	7.26814	5.36105	4.57607	5.00528	7.0848	4.81968	0.554403	0	0	0	0	0	0	0	0	0	0	0
1368	CCCCCCCCC1CCCC1	N-OCTYLCYCLOPENTANE	285.689	0	0	0	0	0	0	0	0	0	0	0	0	0	0	0	0	0	0	0	0	0	0.556904	15.006	45.0389	62.2619	51.8396	42.8656	27.8285	28.8338	1.86479	0	0	0	0	0	0	0	0	0	0	0	0	0	0	0	0
1369	CCCCCCCCCC1CCCC1	N-NONYLCYCLOPENTANE	307.593	0	0	0	0	0	0	0	0	0	0	0	0	0	0	0	0	0	0	0	0	0	0.567214	15.5861	48.0675	67.5881	55.6376	46.3028	29.5641	30.6339	1.93853	0	0	0	0	0	0	0	0	0	0	0	0	0	0	0	0
1370	c1ccc([N][N]Nc2ccccc2)cc1	1,3-DIPHENYLTRIAZENE	246.52	0	0	0	0	0	0	0	0	0	0.504659	0.900027	1.31251	1.301	0.841795	0.568863	0.914063	1.2429	1.70578	8.45958	18.4137	20.8985	15.298	13.342	10.016	10.8818	12.9003	11.1439	21.2228	20.4219	23.0196	22.1443	17.0771	5.37438	0.884096	1.19718	1.04884	0.764225	0.7096	0.486254	0	0	0	0	0	0	0
1371	CC(C)=CC=C(C)C	2,5-DIMETHYL-2,4-HEXADIENE	176.406	0	0	0	0	0	0	0	0	0	0	0	0	0	0	0	0	0	0	0	2.27133	7.20396	21.0121	24.0824	19.0254	15.3925	14.9701	26.5701	15.301	6.21699	7.80854	4.98854	4.05093	4.89772	6.8588	1.10226	0	0	0	0	0	0	0	0	0	0	0
1372	FC(F)=CCl	2-CHLORO-1,1-DIFLUOROETHYLENE	91.801	0	0	0	0	0	0	0	0	0	0	0	0	0	0.367485	2.30023	1.57192	1.02304	1.44236	0.841813	1.00074	1.88149	4.94807	4.04094	5.98996	10.1854	7.7316	16.6088	26.7997	11.6059	8.91715	0.204546	0	0	0	0	0	0	0	0	0	0	0	0	0	0	0
1373	O=C(F)F	CARBONYL_FLUORIDE	58.4185	0	0	0	0	0	0	0	0	0	0	0	0	0	0	0.313868	1.40149	1.71428	2.00893	1.31612	2.10655	1.91649	2.25958	2.6544	3.35423	7.62231	15.622	14.5057	3.30214	1.86863	2.879	4.44504	5.60494	2.43732	0.065826	0	0	0	0	0	0	0	0	0	0	0	0
1374	FC(Cl)(Cl)C(Cl)(Cl)Cl	PENTACHLOROFLUOROETHANE	178.38	0	0	0	0	0	0	0	0	0	0	0	0	0	0	0	0	0	1.17302	2.14595	12.3202	1.88301	2.95774	16.0907	8.50013	1.08898	21.1044	26.757	60.328	12.9697	0	0	0	0	0	0	0	0	0	0	0	0	0	0	0	0	0
1375	C=C=O	KETENE	58.8225	0	0	0	0	0	0	0	0	0	0	0	0	0	0	0	1.84895	3.14191	4.0781	3.06994	3.00001	2.46423	4.2173	4.41351	2.53228	4.1673	5.03283	5.71582	3.8104	4.96735	3.7098	8.91437	7.48133	3.41601	1.58673	0.050749	0	0	0	0	0	0	0	0	0	0	0
1376	O=C1CCC(=O)N1	SUCCINIMIDE	112.383	0	0	0	0	0	0	0	0.127182	0.986041	1.57923	1.07394	1.70736	0.021998	0.400937	0.312643	1.52594	1.48944	6.3745	13.912	11.0338	6.416	6.80746	9.00123	8.05044	3.29516	1.73116	1.71614	1.23785	2.28863	2.03588	1.87775	3.74633	1.55949	1.8526	4.60348	5.06653	11.2527	6.88481	4.69647	0.371325	0	0	0	0	0	0
1377	CC1CC=CC1	4-METHYLCYCLOPENTENE	125.62	0	0	0	0	0	0	0	0	0	0	0	0	0	0	0	0	0	0	0	0.596511	3.17812	6.92555	16.8562	19.6418	19.3793	16.7332	15.911	14.0698	5.61465	3.21687	3.14994	2.23773	2.83379	2.16464	1.29295	0.153831	0	0	0	0	0	0	0	0	0	0
1378	C[C@H]1CC[C@@H](C)C1	CIS-1,3-DIMETHYLCYCLOPENTANE	154.597	0	0	0	0	0	0	0	0	0	0	0	0	0	0	0	0	0	0	0	0	0	0.906373	11.9248	24.5499	32.6235	28.6183	20.7082	18.0386	17.9354	1.53205	0	0	0	0	0	0	0	0	0	0	0	0	0	0	0	0
1379	CCCC(C)(C)C(C)(C)C	2,2,3,3-TETRAMETHYLHEXANE	227.881	0	0	0	0	0	0	0	0	0	0	0	0	0	0	0	0	0	0	0	0	0	3.79631	27.2559	27.8681	36.6179	23.8932	26.3441	26.0831	27.6227	5.43708	0	0	0	0	0	0	0	0	0	0	0	0	0	0	0	0
1380	CC(C)(C)CCC(C)(C)C	2,2,5,5-TETRAMETHYLHEXANE	234.652	0	0	0	0	0	0	0	0	0	0	0	0	0	0	0	0	0	0	0	0	0	1.89769	24.7606	37.4862	42.9166	21.4183	21.7361	25.2409	32.3949	5.84321	0	0	0	0	0	0	0	0	0	0	0	0	0	0	0	0
1381	CCCCCc1cccc2ccccc12	1-N-PENTYLNAPHTHALENE	274.791	0	0	0	0	0	0	0	0	0	0	0	0	0	0	0	0	0	0	2.50623	12.9147	15.4992	16.5153	24.8334	28.8656	27.1683	22.245	20.1373	20.472	16.1063	12.1617	20.6469	15.7529	5.29856	0	0	0	0	0	0	0	0	0	0	0	0	0
1382	CCCCCCOC=O	N-HEXYL_FORMATE	185.341	0	0	0	0	0	0	0	0	0	0	0	0	0	0	0	0.050866	2.63356	2.6708	1.66799	4.22582	6.04619	11.249	24.1586	29.198	25.992	19.4944	15.4275	13.843	7.55698	2.5401	1.98779	3.10956	2.56073	2.9626	2.91582	4.47524	4.973	2.57431	0.654039	0	0	0	0	0	0	0
1383	CCCCCCCCCCCCC1CCCC1	N-DODECYLCYCLOPENTANE	372.281	0	0	0	0	0	0	0	0	0	0	0	0	0	0	0	0	0	0	0	0	0	0.589776	17.0751	58.92	82.0354	67.0869	56.4512	35.0362	36.1684	2.35991	0	0	0	0	0	0	0	0	0	0	0	0	0	0	0	0
1384	CCCCCCCCCCCCCC1CCCC1	N-TRIDECYLCYCLOPENTANE	394.779	0	0	0	0	0	0	0	0	0	0	0	0	0	0	0	0	0	0	0	0	0	0.594448	17.7099	61.9908	87.4206	70.9245	60.114	36.5606	37.9601	2.58369	0	0	0	0	0	0	0	0	0	0	0	0	0	0	0	0
1385	O=C(Cl)c1cccc(Cl)c1	M-CHLOROBENZOYL_CHLORIDE	181.158	0	0	0	0	0	0	0	0	0	0	0	0	0	0	0	0.213207	3.59755	7.01012	7.09077	5.25319	5.22485	8.14493	8.89764	9.54327	16.1673	20.8177	21.4455	16.015	19.9066	13.7034	5.01473	2.54364	4.93779	3.98369	1.72704	0.195469	0	0	0	0	0	0	0	0	0	0
1386	CCCCCCCCCCCCCCC1CCCC1	N-TETRADECYLCYCLOPENTANE	415.07	0	0	0	0	0	0	0	0	0	0	0	0	0	0	0	0	0	0	0	0	0	0.134896	12.8426	62.8463	95.5872	83.5052	64.0725	40.4412	35.4861	0.23256	0	0	0	0	0	0	0	0	0	0	0	0	0	0	0	0
1387	NCCNCCNCCNCCN	TETRAETHYLENEPENTAMINE	270.627	0	0	0	0	0	0	0	0	0	0	0	0	0	0	1.36873	8.0689	7.88322	8.57077	9.11775	9.03906	13.7319	25.1389	24.5031	34.0517	25.3966	19.7439	19.094	7.01583	6.31746	9.3709	3.10269	2.23079	4.23339	2.36322	2.56632	3.26465	3.37533	0.578868	1.61285	5.27089	5.98457	2.17569	1.85167	2.53787	2.02826	2.62189
1388	CC1(C)[C@H]2CC[C@]1(C)C(=O)C2	CAMPHOR	208.282	0	0	0	0	0	0	0	0	0	0	0	0	0	0	0	0	0	0	0.137358	2.64935	6.06342	19.346	26.6461	29.0846	20.1186	20.7391	21.9064	13.989	1.27781	1.64157	1.81775	1.33108	1.02674	1.10743	2.23825	2.14988	4.34548	3.96922	2.52902	1.13768	0.064391	0	0	0	0	0
1389	c1cnoc1	ISOXAZOLE	83.26	0	0	0	0	0	0	0	0	0	0	0	0	0	0.160523	2.17276	4.92773	5.61525	4.63436	3.77938	4.56656	3.34871	3.84717	4.07545	3.50371	4.49346	3.77897	5.74718	5.4719	7.17704	5.49837	2.60982	3.97123	6.31106	3.10607	1.96447	2.21052	0.929998	2.33526	1.38641	0.627788	0	0	0	0	0	0
1390	CCCC[C@@H](CC)COC(C)=O	2-ETHYLHEXYL_ACETATE	250.867	0	0	0	0	0	0	0	0	0	0	0	0	0	0	0	0	0	0.330795	2.63627	4.88175	8.91261	11.3964	28.4513	37.6338	41.705	26.8786	23.0739	19.8139	12.0453	3.35988	0.947654	1.83532	2.34829	1.97373	2.10728	2.36202	3.92765	4.55506	2.37597	0.378272	0	0	0	0	0	0
1391	CC(C)(c1ccccc1)c1ccc(O)cc1	P-CUMYLPHENOL	278.454	0	0	0	0	0	0	0.171724	0.865193	1.20755	0.625444	0.7052	1.35898	0.806048	0.729221	0.761728	0.844034	0.7409	3.2225	7.90955	15.2012	16.79	19.2841	17.0295	15.6249	13.3281	15.4105	18.8494	9.55101	16.4993	13.1078	15.1318	16.4503	17.3188	5.48477	1.07641	2.51012	2.54749	0.346529	0	0	0	0	0	0	0	0
1392	C[C@H]1CC[C@H](O)CC1	TRANS-4-METHYLCYCLOHEXANOL	161.882	0	0	0	0	0	0	0	0	0	0.052593	0.343654	1.59822	0.380481	0.525505	0.890421	1.32385	0.915032	0.492112	0.554102	1.45541	0.784094	6.61536	17.6132	22.2634	22.6764	19.412	19.4065	16.1354	8.76186	1.60668	1.80075	0.375446	0.631497	0.444792	0.723146	0.843035	1.6381	2.18262	0.888179	1.67101	1.41104	0.71082	0.146242	0	0	0
1393	C=COC	METHYL_VINYL_ETHER	87.4531	0	0	0	0	0	0	0	0	0	0	0	0	0	0	0	0	0	0.652199	3.58855	10.5021	11.5024	10.6475	7.97325	8.69789	6.08034	4.31952	4.83704	3.33314	3.69547	3.47233	3.22145	4.24825	4.86278	4.92454	4.54604	2.69546	1.76006	0.023473	0	0	0	0	0	0	0	0
1394	COCC(=O)O	METHOXYACETIC_ACID	108.264	0	0	0	0	0	0	0.134774	1.24432	0.440783	1.06788	1.4123	1.06332	0.289386	0.200716	0.381641	1.3308	0.668283	1.78735	6.20894	6.32763	11.0722	11.664	9.44581	10.8196	7.01465	3.27315	1.94387	3.34732	4.4905	3.79864	2.7446	1.24495	4.70462	4.48596	3.84738	6.2308	4.46047	2.77769	2.71549	1.90216	0.050687	0	0	0	0	0
1395	ClC/C=C\CCl	1,4-DICHLORO-CIS-2-BUTENE	142.818	0	0	0	0	0	0	0	0	0	0	0	0	0	0	0	0	4.11754	10.6306	8.88215	8.03296	8.90039	4.58542	5.63785	6.24808	8.13146	5.13348	11.7776	11.7587	6.73996	7.76719	22.0914	14.3624	7.13111	0	0	0	0	0	0	0	0	0	0	0	0	0
1396	ClC/C=C/CCl	1,4-DICHLORO-TRANS-2-BUTENE	142.377	0	0	0	0	0	0	0	0	0	0	0	0	0	0	0	0	1.60942	8.33869	10.746	9.59211	11.0986	6.02147	5.74005	4.72635	8.73782	6.98392	11.4123	11.7819	6.99601	7.08158	19.8752	13.9702	8.86054	0	0	0	0	0	0	0	0	0	0	0	0	0
1397	C=C[C@H](Cl)CCl	3,4-DICHLORO-1-BUTENE	141.422	0	0	0	0	0	0	0	0	0	0	0	0	0	0	0	0.309077	4.92776	5.24884	4.92354	8.28799	8.15333	7.2008	6.97799	8.24909	7.27001	7.27849	12.373	11.3216	8.81325	15.5907	17.633	10.5598	1.8141	0	0	0	0	0	0	0	0	0	0	0	0	0
1398	C=COC=C	DIVINYL_ETHER	103.424	0	0	0	0	0	0	0	0	0	0	0	0	0	0	0	1.14917	3.40006	3.7141	6.30443	8.36552	10.5492	4.50971	6.19055	6.40208	6.23889	7.37019	6.36499	6.24294	4.63379	7.83	9.13508	9.60079	6.3883	6.75551	0.724994	0	0	0	0	0	0	0	0	0	0	0
1399	C/C=C\C(=O)O	CIS-CROTONIC_ACID	110.468	0	0	0	0	0	0	0	0.293056	1.32559	0.147857	1.12745	1.40019	1.02972	0.273644	0.278069	0.322541	0.987229	0.864709	2.93286	6.2841	9.38873	7.53062	6.73991	8.44764	9.53426	12.6002	9.54236	6.82421	6.71457	4.16353	3.78354	2.1704	1.37041	5.35686	4.25661	2.62198	5.04844	1.533	0.265855	0	0	0	0	0	0	0
1400	C/C=C/C(=O)O	TRANS-CROTONIC_ACID	111.898	0	0	0	0	0	0	0	0.952548	0.813942	0.308251	1.60344	1.31822	0.481683	0.173841	0.309074	0.591252	0.98664	1.23689	2.57412	9.42295	9.08291	8.23446	7.64514	7.1149	11.3524	11.3245	7.34583	5.08953	5.91107	5.16634	4.01482	1.75877	1.48694	3.44695	5.42597	1.73481	5.17304	4.90948	0.622588	0	0	0	0	0	0	0
1401	CC[C@@H](C)C(=O)O	2-METHYLBUTYRIC_ACID	139.891	0	0	0	0	0	0	0	0.742767	1.02372	0.240283	1.48441	1.386	0.623575	0.143248	0.289326	0.634311	1.04484	0.665612	0.371384	1.33428	4.98061	12.651	16.0123	18.1513	16.0541	14.5484	12.2208	8.17839	3.21421	3.17597	3.46597	2.40836	2.13114	3.23745	3.3455	2.57925	6.41334	2.98509	0.615343	0	0	0	0	0	0	0
1402	N[C@@H](Cc1ccccc1)C(=O)O	L-PHENYLALANINE	209.394	0	0	0	0	0	0	0.078698	1.1216	0.587234	0.822097	1.39654	1.29544	0.331538	0.1862	1.39747	2.78329	2.80479	3.44041	4.59743	9.5142	15.2657	16.5078	15.4319	14.0756	10.8301	9.05275	7.78189	7.92824	13.0286	11.0297	12.3082	10.2364	7.85319	5.0905	2.71648	6.47498	4.06931	1.09264	0.256551	0.801954	0.966946	0	0	0	0	0
1403	FC(F)OCC(F)(F)F	2-(DIFLUOROMETHOXY)-1,1,1-TRIFLUOROETHANE	133.005	0	0	0	0	0	0	0	0	0	0	0	0	0	0.913513	4.77621	4.51565	4.2321	3.71982	4.77355	2.29635	3.3344	2.36213	2.67695	3.39162	3.51016	5.2781	14.4538	30.7155	28.7855	14.8471	7.76877	1.63482	0	0	0	0	0	0	0	0	0	0	0	0	0	0
1404	CCCCCCCC1CCCC1	N-HEPTYLCYCLOPENTANE	263.743	0	0	0	0	0	0	0	0	0	0	0	0	0	0	0	0	0	0	0	0	0	0.553777	14.3575	41.7327	57.3839	47.6945	39.4903	26.2472	26.9853	1.6152	0	0	0	0	0	0	0	0	0	0	0	0	0	0	0	0
1405	O=COC1CCCCC1	CYCLOHEXYL_FORMATE	167.694	0	0	0	0	0	0	0	0	0	0	0	0	0	0	0	0.390169	3.41093	3.44009	2.54886	2.95988	4.86692	14.1547	25.1437	23.7664	18.0768	18.0345	12.3478	5.74954	1.80257	1.30112	2.28918	3.32028	1.56481	3.22054	4.08081	7.2381	4.59965	3.1342	1.292	0.02116	0	0	0	0	0	0
1406	CC(C)(C)c1ccc(C(C)(C)C)cc1	1,4-DI-TERT-BUTYLBENZENE	282.664	0	0	0	0	0	0	0	0	0	0	0	0	0	0	0	0	0	0	0.290512	3.21872	7.29607	22.3938	34.2178	33.5798	24.6612	19.2686	21.1311	40.1197	13.8459	5.78893	6.37382	8.54923	6.24156	4.96427	0.481803	0	0	0	0	0	0	0	0	0	0	0
1407	CCCOC(=O)/C=C\C(=O)OCCC	DIPROPYL_MALEATE	265.114	0	0	0	0	0	0	0	0	0	0	0	0	0	0	0	0	1.24393	3.58105	4.39982	6.40346	12.2761	20.8429	27.2094	33.2876	24.7851	26.2538	18.0141	14.094	5.26173	2.30439	3.15999	3.44549	2.91827	4.8384	3.49441	4.77341	9.87171	4.76365	0.886509	0	0	0	0	0	0	0
1408	O=CC=O	GLYOXAL	70.5604	0	0	0	0	0	0	0	0	0	0	0	0	0	0	0	0.227959	7.2714	11.5966	5.56922	3.94803	4.50538	3.86705	2.53812	3.22971	1.98399	0.999932	2.24895	2.58196	1.83291	3.31531	4.10646	5.67137	5.37287	7.91186	6.20765	3.26398	0.599832	0	0	0	0	0	0	0	0	0
1409	CC[C@H](O)c1ccccc1	1-PHENYL-1-PROPANOL	185.318	0	0	0	0	0	0	0	0	0	0.260104	0.515215	1.55468	0.044946	0.16327	1.36608	1.16368	0.822979	0.417551	1.66166	9.52343	12.9769	16.3421	15.0618	16.1878	13.0727	13.0674	14.7421	11.9329	11.7165	5.89849	10.6303	8.52452	6.77315	1.17809	1.9201	1.79133	0.686581	0.713075	2.04384	1.36685	0.288813	0	0	0	0	0
1410	C1CN2CCN1CC2	TRIETHYLENEDIAMINE	148.896	0	0	0	0	0	0	0	0	0	0	0	0	0	0	0	0	0	0	0	0	1.16389	24.7634	32.7673	23.934	14.4737	12.3384	7.10266	4.73442	2.011	3.01239	1.94917	2.74453	1.5826	0.570928	0.694196	1.65191	0.247987	2.7004	1.92169	0.546971	0.717048	1.81681	1.2057	1.18702	0.753374	0
1411	CC[C@H](C)O[C@@H](C)CC	DI-SEC-BUTYL_ETHER	202.92	0	0	0	0	0	0	0	0	0	0	0	0	0	0	0	0	0	0	0	0	1.73853	15.1439	24.9194	33.2521	25.636	23.993	25.9756	27.3919	9.76122	1.48969	0.881835	0.207116	0.681861	1.96007	0.175408	0.05997	0.947244	1.92567	1.04788	1.20441	0.595019	0.803496	0.049096	0	0	0
1412	FC(F)OC(F)F	BIS(DIFLUOROMETHYL)ETHER	102.944	0	0	0	0	0	0	0	0	0	0	0	0	0	5.43473	5.92091	2.46201	2.56856	1.82621	1.63668	2.47401	2.78393	1.31859	2.2129	3.22929	2.58904	2.36643	4.172	16.0616	22.361	32.6535	3.88793	0.172161	0	0	0	0	0	0	0	0	0	0	0	0	0	0
1413	CCCCCCCOC=O	N-HEPTYL_FORMATE	207.516	0	0	0	0	0	0	0	0	0	0	0	0	0	0	0	0.05474	2.64195	2.65956	1.70921	4.09656	6.15538	11.0638	24.3391	33.612	30.4105	24.0179	18.4909	15.1688	9.67399	2.72576	1.94754	3.1253	2.50802	3.03088	2.90408	4.48395	4.88767	2.61795	0.651211	0	0	0	0	0	0	0
1414	CCOCCOCCOCCO	2-(2-(2-ETHOXYETHOXY)ETHOXY)ETHANOL	234.219	0	0	0	0	0	0	0	0	0.109235	0.601784	1.72481	0.465249	0.731169	0.715562	1.09478	1.07577	0.647944	0.998528	0.981718	2.66597	14.6829	39.0323	35.8276	24.2263	22.5784	19.758	15.2452	6.89073	4.25612	4.79455	2.90398	3.27809	2.10675	3.91582	9.01326	7.18193	4.17753	6.78932	4.22726	2.55932	0.905909	0	0	0	0	0
1415	FC(F)(F)c1ccc(Cl)cc1	P-CHLOROBENZOTRIFLUORIDE	178.876	0	0	0	0	0	0	0	0	0	0	0	0	0	0	0	0.043911	4.74893	8.62018	5.53975	6.35534	4.56875	5.49747	4.96647	3.45377	10.4647	15.693	19.8388	35.7461	38.9171	13.9225	0.54838	0	0	0	0	0	0	0	0	0	0	0	0	0	0	0
1416	C[C@@H](Cl)[C@@H](C)Cl	2,3-DICHLOROBUTANE	146.991	0	0	0	0	0	0	0	0	0	0	0	0	0	0	0	0	0.229962	3.66642	3.56394	5.1472	12.946	12.2082	10.4682	10.1112	16.0416	9.00692	6.12999	9.93812	7.59516	6.37918	16.6914	12.1975	5.34774	0	0	0	0	0	0	0	0	0	0	0	0	0
1417	CCc1cc(CC)c(CC)c(CC)c1	1,2,3,5-TETRAETHYLBENZENE	285.25	0	0	0	0	0	0	0	0	0	0	0	0	0	0	0	0	0	0	0	0.073034	1.60229	12.3274	40.5036	36.6833	33.9594	34.4735	32.1407	32.3316	8.39933	6.81235	5.49892	6.17029	5.58614	3.03705	0.643312	0	0	0	0	0	0	0	0	0	0	0
1418	C/C=C\c1ccccc1	CIS-1-PROPENYLBENZENE	167.887	0	0	0	0	0	0	0	0	0	0	0	0	0	0	0	0	0	0	1.77195	11.5177	18.884	15.675	15.8137	9.49267	10.4144	11.4532	11.1727	9.56948	9.51123	7.81569	17.1536	11.2585	8.68919	1.0315	0	0	0	0	0	0	0	0	0	0	0	0
1419	C/C=C/c1ccccc1	TRANS-1-PROPENYLBENZENE	168.241	0	0	0	0	0	0	0	0	0	0	0	0	0	0	0	0	0	0.149478	3.40051	11.6362	16.9725	15.6488	15.5933	10.7084	11.2351	11.2252	12.3232	9.43041	10.7945	7.31426	15.9097	12.2371	9.30728	0.944644	0	0	0	0	0	0	0	0	0	0	0	0
1420	CCCCOCCOCCOCCO	2-(2-(2-BUTOXYETHOXY)ETHOXY)ETHANOL	277.857	0	0	0	0	0	0	0	0	0.147968	0.550451	1.57461	0.430845	1.0357	0.59811	1.52745	0.425451	1.00866	0.877374	1.27738	2.31372	13.4864	35.4651	41.1554	34.5631	32.4655	26.1702	17.2559	14.7673	7.24798	5.08299	2.75757	2.97938	2.02329	4.11868	8.71434	7.53457	4.47521	6.0323	4.78358	2.5188	0.749591	0	0	0	0	0
1421	CCC(C(C)C)C(C)C	2,4-DIMETHYL-3-ETHYLPENTANE	209.47	0	0	0	0	0	0	0	0	0	0	0	0	0	0	0	0	0	0	0	0	0	3.36595	22.4715	24.5135	37.2317	28.0884	24.2222	27.2969	23.2231	3.31735	0	0	0	0	0	0	0	0	0	0	0	0	0	0	0	0
1422	CCCCC(CC)CC	3-ETHYLHEPTANE	212.103	0	0	0	0	0	0	0	0	0	0	0	0	0	0	0	0	0	0	0	0	0	1.18732	15.9317	32.528	43.1488	32.4113	31.1004	28.431	20.2338	1.56069	0	0	0	0	0	0	0	0	0	0	0	0	0	0	0	0
1423	CC1=CC(=O)OC1=O	METHYL_MALEIC_ANHYDRIDE	125.77	0	0	0	0	0	0	0	0	0	0	0	0	0	0.023528	1.10305	2.78104	1.3624	3.6282	10.5491	11.5016	8.32687	9.72999	10.9572	12.7068	5.3557	2.12731	2.39356	2.70267	2.57577	3.9548	5.75411	6.21416	8.64718	11.0826	7.63937	4.52153	0.722416	0	0	0	0	0	0	0	0	0
1424	C[C@H](O)C#N	LACTONITRILE	96.7995	0	0	0	0	0	0	0.104522	0.724492	0.974034	1.07786	0.294576	0.911677	1.52482	0.723426	0.248064	3.41826	3.70995	2.72756	4.7729	7.40518	7.24979	5.37468	6.22696	4.57014	7.99311	3.58923	3.60082	2.91138	2.06168	3.08019	2.15795	3.36633	4.14707	6.26484	6.4675	5.87957	4.92724	3.59065	0.348545	0	0	0	0	0	0	0
1425	C[C@@H]1CCC[C@H]1C	TRANS-1,2-DIMETHYLCYCLOPENTANE	153.352	0	0	0	0	0	0	0	0	0	0	0	0	0	0	0	0	0	0	0	0	0	0.948125	14.2593	22.6987	30.3903	25.2827	19.4648	22.1521	16.5508	1.11243	0	0	0	0	0	0	0	0	0	0	0	0	0	0	0	0
1426	CC(C)CCCCO	5-METHYL-1-HEXANOL	180.246	0	0	0	0	0	0	0	0	0	0.211515	0.547233	1.71509	0.332913	0.603298	0.894567	1.21349	0.850858	0.501631	0.423837	1.44716	2.3257	6.3566	21.5512	29.3578	30.5574	20.9828	17.3384	15.7039	12.4681	2.19267	1.09622	1.28401	1.39755	0.703225	1.17188	1.01229	1.24144	1.44634	2.37695	2.20872	1.87167	0.824657	0	0	0	0
1427	Clc1sc(Cl)c(Cl)c1Cl	TETRACHLOROTHIOPHENE	192.382	0	0	0	0	0	0	0	0	0	0	0	0	0	0	0	0	0	0	1.32162	3.69325	10.6839	5.0314	9.7254	16.4588	17.5717	31.3016	30.0678	31.2766	25.3665	4.34813	0	0	0	0	0	0	0	0	0	0	0	0	0	0	0	0
1428	COc1ccc(CC(=O)O)cc1	4-METHOXYPHENYLACETIC_ACID	204.029	0	0	0	0	0	0	0	0.918335	0.867795	0.445164	1.52901	1.37793	0.453425	0.137096	0.347683	0.790885	1.01725	0.784333	5.40238	16.9779	18.4093	15.4176	13.9582	12.8039	11.388	8.33873	6.60293	7.79384	12.9762	15.8561	11.8231	7.09111	5.4197	5.8795	4.21851	6.03942	5.19646	1.6238	0.000211	0	0	0	0	0	0	0
1429	C[C@@H]1CCCC[C@@H]1O	CIS-2-METHYLCYCLOHEXANOL	160.68	0	0	0	0	0	0	0	0	0	0.154463	0.463691	1.45738	0.593816	0.602574	0.583651	1.14297	0.990752	0.634635	0.440631	1.30134	0.996217	4.27757	20.0759	24.543	25.1047	16.0282	17.0569	15.3821	8.15396	2.36127	1.02734	0.6738	1.39915	0.735122	0.791696	0.50428	1.82526	2.01261	1.95877	1.26629	1.15433	0.822749	0.122359	0	0	0
1430	C[C@H]1CCCC[C@@H]1O	TRANS-2-METHYLCYCLOHEXANOL	160.892	0	0	0	0	0	0	0	0	0	0.112052	0.331212	1.64421	0.47104	0.400218	0.539564	1.63646	0.790721	0.481961	0.856588	1.16269	0.622838	5.86482	18.5176	22.617	21.827	18.8034	18.9146	18.1279	7.841	1.27084	1.78081	0.446534	0.628062	0.45083	0.685113	0.898851	1.58884	2.21763	0.88763	1.72937	1.33344	0.693628	0.122108	0	0	0
1431	CC(C)(C)NC=O	TERT-BUTYLFORMAMIDE	146.59	0	0	0	0	0	0	0	0	0	0	0.089261	0.734797	0.667651	0.926353	1.34862	1.03855	0.566916	0.428447	2.85738	4.88886	13.9986	17.7041	17.7838	11.3013	10.3188	11.5358	18.905	6.0672	2.62368	2.06602	0.48838	0.368493	1.11212	1.66896	1.11547	1.04085	1.01516	2.21168	4.82432	5.13118	3.51015	1.24785	0.022145	0	0	0
[truncated: 714 more rows]
[truncated: 5 more columns]

## Sheet: Table S2
Table S2. The infinite dilution activity coefficient in benzene and cyclohexane of 2130 compounds.
A: Cyclohexane B: Benzene
No.	SMILES	Names	lnγA	lnγB
[truncated: 2,125 more rows]

## Sheet: Table S3
Table S3. The optimal hyperparameter combinations for the random forest and support vector machine-based prediction models of the IDAC-benzene and IDAC-cyclohexane.
[truncated: 10 more rows]

[truncated: 4 more sheets: Table S4, Table S5, Table S6, Table S7]
